# Supplementary material for: FSHβ links photoperiodic signaling to seasonal reproduction in Japanese quail
Source: eLife. 2023 Dec 27;12:RP87751. doi: 10.7554/eLife.87751 (PMC10752586; doi:10.7554/eLife.87751)
Supplement: Figure 1—source data 6. [file elife-87751-fig1-data6.xlsx]

## Sheet: MBH WGCNA analyses
Figure 1 - Supplement 8 - WGCNA analyses of the MBH
Gene ID	GS.PTW	p.GS.PTW	MM.green	p.MM.green	MM.pink	p.MM.pink	MM.brown	p.MM.brown	MM.blue	p.MM.blue	MM.red	p.MM.red	MM.turquoise	p.MM.turquoise	MM.magenta	p.MM.magenta	MM.yellow	p.MM.yellow	MM.black	p.MM.black	MM.grey	p.MM.grey
LOC121108687	0.35859	0.0143996	0.93442	2.39301e-21	-0.0535689	0.723656	0.00114694	0.993964	-0.0732417	0.628578	0.0148283	0.922085	0.167789	0.265018	-0.245862	0.0995542	0.107363	0.477587	0.173026	0.250175	-0.0175002	0.908101
LOC121108688	0.354736	0.0155645	0.934133	2.62654e-21	-0.0549743	0.716704	-4.12077e-05	0.999783	-0.0717343	0.63568	0.0170117	0.910655	0.167041	0.267186	-0.233462	0.118405	0.103792	0.492437	0.183948	0.221051	-0.00947357	0.950176
LOC121108697	0.4023	0.00557792	0.914964	5.93373e-19	0.00257733	0.986437	-0.00827839	0.956455	-0.0799341	0.597454	0.00966652	0.949162	0.158741	0.292018	-0.265187	0.0748911	0.108781	0.471758	0.133159	0.377663	-0.0209119	0.890285
LOC112531365	0.399082	0.00600718	0.901134	1.4128e-17	-0.0571784	0.705847	0.00454315	0.976095	-0.061781	0.683363	0.0242	0.873166	0.170783	0.256464	-0.27933	0.0601104	0.0961526	0.524994	0.133941	0.374842	-0.00480546	0.974715
LOC121108682	0.396283	0.00640356	0.862295	1.37041e-14	-0.048836	0.747226	0.00399351	0.978986	-0.0561342	0.710984	0.0306963	0.839518	0.164817	0.273697	-0.28215	0.0574631	0.094686	0.531363	0.121532	0.421063	0.0203257	0.893343
LOC121106527	0.378781	0.00943612	0.776456	2.27932e-10	-0.0410927	0.786277	0.00155657	0.991809	-0.0452234	0.765374	0.0369486	0.807398	0.164473	0.274714	-0.295623	0.0460798	0.0862515	0.568711	0.153233	0.309299	0.0495278	0.743766
LOC101747238	0.239858	0.108371	0.749839	2.00667e-09	-0.0996384	0.510008	-0.0547539	0.717793	-0.103697	0.492836	-0.0361569	0.811449	0.257447	0.0841167	-0.227323	0.128682	0.320595	0.0298379	0.244957	0.100847	-0.0265208	0.861116
ACP6	0.239226	0.109332	0.724217	1.27999e-08	-0.0877017	0.562204	0.00277978	0.985372	-0.0694694	0.646412	0.0209109	0.89029	0.301312	0.0418589	-0.233245	0.118757	-0.0117872	0.938029	0.0655918	0.66495	0.109887	0.467237
KLF3	0.331944	0.0242139	0.716502	2.14912e-08	-0.0725677	0.63175	-0.0455399	0.763779	-0.136434	0.365936	-0.0482296	0.750263	0.231685	0.121314	-0.197269	0.188819	-0.125241	0.406924	0.0667995	0.659154	0.0112562	0.940816
MAP3K4	0.140021	0.353346	0.709448	3.40172e-08	-0.151342	0.315378	-0.0473613	0.754619	-0.0751196	0.619777	-0.0221695	0.883731	0.330635	0.0248135	-0.227133	0.129011	-0.0482249	0.750287	0.029279	0.846837	0.36624	0.0123059
DNMBP	0.326355	0.0268613	0.708901	3.52299e-08	-0.0773477	0.609402	-0.0106641	0.943924	-0.0641848	0.671726	0.00377823	0.980119	0.228173	0.127221	-0.242892	0.103844	0.0995409	0.510424	0.165983	0.27027	-0.0574421	0.704552
NARF	0.498557	0.000421391	0.69924	6.45937e-08	-0.162367	0.28099	0.0093838	0.950647	0.0412007	0.785728	0.0469078	0.756896	-0.00657492	0.965409	0.0774997	0.608697	-0.00615977	0.967592	-0.0593508	0.695203	0.0893331	0.554926
STYK1	0.202003	0.178215	0.673855	2.85291e-07	-0.181265	0.227978	0.134739	0.371979	-0.14941	0.321669	0.156464	0.299084	0.270527	0.0690064	-0.302056	0.0413313	0.271729	0.0677327	0.0768321	0.611796	0.246068	0.0992623
HPS5	0.190494	0.204767	0.665709	4.45883e-07	-0.0758803	0.616227	-0.029553	0.84542	-0.0645118	0.670149	-0.0219772	0.884733	0.147992	0.326333	-0.0267469	0.859944	0.17798	0.23666	0.090333	0.550487	0.0978521	0.51766
PRKCD	0.176956	0.239411	0.664069	4.86996e-07	-0.110383	0.465215	-0.0591012	0.696423	-0.114426	0.448925	-0.031333	0.836234	0.243356	0.103164	-0.358738	0.0143564	0.286209	0.0538184	0.136253	0.366579	-0.011591	0.939059
CETN1L	0.193019	0.198716	0.660537	5.87871e-07	-0.0981405	0.516421	-0.035967	0.812421	-0.0193964	0.898193	-0.00847171	0.955439	0.297563	0.0446032	-0.225118	0.132533	0.0531486	0.725739	-0.00779939	0.958973	0.152921	0.310296
CHST15	0.254618	0.0877019	0.647121	1.17547e-06	-0.0493729	0.744541	-0.0252527	0.867697	-0.12897	0.392983	0.0625793	0.679491	0.0783622	0.604703	-0.0742604	0.623797	0.0868038	0.566229	-0.0982376	0.516004	0.0804601	0.595037
JAM3	0.0807186	0.59385	0.63519	2.11734e-06	-0.235964	0.114399	0.215306	0.150717	-0.146426	0.331534	-0.14467	0.337432	0.154281	0.305962	-0.14913	0.322584	0.126766	0.401188	0.0573517	0.704996	0.0149457	0.92147
SNX13	0.145565	0.334419	0.634522	2.18663e-06	0.0486529	0.748143	0.06948	0.646361	-0.0168777	0.911357	-0.0279306	0.853812	0.00134219	0.992937	-0.134446	0.373026	-0.0281151	0.852857	-0.131692	0.382987	-0.0370009	0.807131
GTF3C3	0.253447	0.0892193	0.614854	5.46108e-06	-0.196674	0.190184	-0.091273	0.54633	-0.0792029	0.600821	-0.0747462	0.621523	0.385524	0.00814643	-0.392505	0.00697465	0.126468	0.402303	0.178245	0.235953	0.145155	0.335796
GCN1	0.211857	0.157526	0.607378	7.61052e-06	-0.175622	0.24303	-0.0930455	0.538532	0.0482067	0.750378	0.257942	0.0835005	0.137767	0.361228	-0.21083	0.159596	0.0401681	0.790976	0.0918334	0.543859	0.264019	0.0762305
BTN3A3	0.326398	0.0268399	0.603019	9.19964e-06	-0.106725	0.480223	-0.0727224	0.631021	-0.0577523	0.70303	0.453471	0.00155089	-0.0749529	0.620556	0.019227	0.899078	0.153444	0.308623	-0.0646128	0.669663	0.0533398	0.724791
CHMP7	0.0775448	0.608488	0.597509	1.16453e-05	-0.217148	0.147169	-0.0452663	0.765158	0.13259	0.379722	-0.0826931	0.584823	0.327556	0.0262727	-0.336177	0.0223572	0.160082	0.287907	0.367813	0.0119093	0.216776	0.147882
BTN3A2	0.211836	0.157567	0.590603	1.55532e-05	-0.156789	0.298068	0.395834	0.00646929	-0.15136	0.315319	0.228431	0.12678	-0.122917	0.415754	-0.0116561	0.938717	0.146754	0.33044	-0.0829819	0.583507	-0.0128183	0.93262
BTBD10	0.174936	0.244906	0.584939	1.96224e-05	-0.137727	0.361368	-0.246407	0.0987828	0.00370532	0.980502	0.0362899	0.810768	0.352477	0.0162837	-0.243753	0.102586	-0.00818837	0.956928	0.215261	0.150804	0.361759	0.0134983
SH2D1A	0.0525187	0.728865	0.584388	2.00667e-05	-0.271407	0.0680724	-0.0240909	0.873733	0.207012	0.167468	0.0873083	0.563966	0.111165	0.46204	-0.206714	0.168092	0.05754	0.704072	0.241705	0.105597	0.327691	0.0262073
LOC121107837	0.238518	0.110416	0.584312	2.01282e-05	-0.163027	0.279015	0.349766	0.017184	-0.155015	0.303639	0.315224	0.0328551	-0.0960895	0.525267	-0.0349204	0.817786	0.180145	0.230914	-0.111419	0.461009	-0.0259041	0.864315
RPP38	0.136256	0.366568	0.581358	2.26773e-05	0.0392959	0.795417	-0.0821651	0.587231	-0.11696	0.438876	-0.0794904	0.599496	0.0960043	0.525636	-0.0678843	0.653965	0.175393	0.243655	0.0388616	0.79763	0.0607621	0.688318
PCBP3	0.312137	0.0347002	0.57567	2.84387e-05	-0.0456822	0.763062	-0.0142285	0.925227	0.00655108	0.965535	-0.00775144	0.959225	0.0170902	0.910245	-0.0509484	0.736677	-0.0449883	0.766559	0.0642549	0.671388	0.123144	0.414883
GGT2	0.06603	0.662845	0.574281	3.0036e-05	-0.172662	0.251188	0.135778	0.368268	-0.137759	0.361253	-0.0202865	0.893547	0.567023	3.98036e-05	-0.456258	0.00143809	0.245561	0.0999828	0.357582	0.014697	0.138993	0.356927
LOC101752265	0.141934	0.346742	0.572937	3.16593e-05	-0.072973	0.629842	0.000985398	0.994814	-0.0435351	0.773898	-0.0287916	0.849357	0.083158	0.582706	-0.0739854	0.625086	0.11557	0.444373	0.0448455	0.767279	-0.106045	0.483043
LOC121113332	0.27224	0.0671982	0.571499	3.34856e-05	-0.111456	0.460862	-0.0478039	0.752398	-0.0171543	0.90991	-0.0797989	0.598076	0.31641	0.0321681	-0.131347	0.384247	0.19232	0.200379	0.0294287	0.846063	0.000129368	0.999319
DHRS7	0.0457796	0.762571	0.561104	4.98354e-05	-0.131644	0.383161	-0.0326023	0.829696	-0.00691176	0.963638	0.10739	0.477474	0.411023	0.00454588	-0.44747	0.00182082	0.0783814	0.604614	0.283938	0.0558345	0.332588	0.0239232
ATXN1L	0.178537	0.235173	0.560829	5.03542e-05	-0.20006	0.182514	0.180457	0.230093	-0.183211	0.22294	0.4704	0.000970703	0.138681	0.358017	-0.293249	0.04794	0.147777	0.327046	-0.0827312	0.584649	0.0315184	0.835278
GNAO1	0.0041963	0.977919	-0.558028	5.59155e-05	0.335272	0.0227438	-0.110207	0.465932	0.0456492	0.763228	-0.130297	0.388092	-0.205654	0.170333	0.157035	0.297303	-0.117163	0.438075	-0.00350401	0.981561	-0.129328	0.391659
S100A1	0.463223	0.00118748	0.557953	5.60716e-05	-0.137201	0.363221	-0.0781521	0.605675	-0.144581	0.33773	-0.126897	0.400697	0.189864	0.206297	0.0310698	0.837591	0.0660269	0.66286	0.176312	0.241155	-0.0272011	0.85759
AMFR	0.350463	0.0169485	0.557746	5.65058e-05	0.196742	0.190027	-0.196836	0.189811	-0.0761554	0.614945	-0.017514	0.908028	0.294256	0.0471435	-0.251169	0.0922318	0.0252299	0.867815	0.189284	0.207712	0.246859	0.0981463
NT5C1A	0.102315	0.498651	0.554574	6.35456e-05	-0.234369	0.11694	0.0927925	0.539642	-0.133161	0.377654	-0.0415671	0.783868	0.313743	0.0337303	-0.182782	0.224045	0.0174503	0.908362	0.105301	0.486134	0.261978	0.0786137
KCNT1	0.00890815	0.953146	0.551995	6.98516e-05	-0.0791229	0.60119	-0.0736097	0.626849	-0.0978945	0.517478	-0.0416144	0.783628	0.025077	0.868609	0.0846913	0.57575	-0.107707	0.476168	0.24997	0.0938488	0.411001	0.00454828
NAA40	0.450844	0.00166432	0.550279	7.43585e-05	0.00846535	0.955473	-0.100627	0.505796	-0.132403	0.3804	0.0153699	0.919248	0.280995	0.0585361	-0.174761	0.245385	-0.0564166	0.709593	0.134572	0.372575	0.0712668	0.637889
TMEM39B	0.0669944	0.658221	0.547666	8.17321e-05	-0.182402	0.225025	-0.09985	0.509105	-0.089399	0.554633	0.180461	0.230084	0.421406	0.00353829	-0.374679	0.0103036	0.117384	0.437205	0.122817	0.416134	0.337779	0.0216863
ACSBG2	0.319027	0.0306936	0.547155	8.32481e-05	0.00187857	0.990114	-0.151707	0.314198	-0.0198651	0.895747	0.359226	0.0142146	0.429608	0.00288683	-0.522833	0.000193266	0.0820845	0.587598	0.250273	0.093438	0.0427335	0.777955
LRCH1	-0.123292	0.414319	0.542823	9.71845e-05	-0.0603468	0.690342	-0.094499	0.532178	0.205796	0.170031	-0.0889791	0.556502	0.0460856	0.761031	-0.203846	0.174204	-0.0765815	0.612962	0.0541789	0.720636	0.114641	0.448065
AGO3	-0.0747363	0.621569	0.537616	0.000116728	-0.169862	0.259074	-0.0137647	0.927658	0.0514426	0.734215	-0.0928205	0.539519	0.186426	0.214785	-0.179196	0.233422	-0.148462	0.324782	0.16893	0.261736	0.499812	0.00040531
ASPHD1	-0.0789086	0.602179	0.534605	0.0001296	-0.255699	0.0863176	0.454865	0.00149355	-0.213943	0.153381	-0.130527	0.387247	0.245022	0.100754	-0.129376	0.391483	0.102452	0.498073	-0.0159964	0.915968	0.272797	0.0666184
TIMM17B	0.25334	0.0893593	0.532042	0.000141561	0.0571269	0.7061	-0.120831	0.423771	-0.108238	0.473987	0.250335	0.0933543	0.467369	0.00105751	-0.452855	0.00157686	0.1259	0.40444	0.217277	0.146923	0.202922	0.176206
HRASLS	0.180258	0.230616	0.530946	0.000146974	-0.106367	0.481704	-0.0934252	0.536868	-0.0871994	0.564454	0.153839	0.307366	0.502295	0.000375136	-0.488589	0.000570877	0.400509	0.00581341	0.280249	0.0592372	0.0955419	0.527641
ARMC10	0.325336	0.0273691	0.530295	0.000150278	-0.182155	0.225663	0.222493	0.137229	-0.0492878	0.744966	0.187391	0.212379	0.219353	0.143006	-0.194157	0.196031	0.136682	0.365055	0.0816052	0.589789	0.0685757	0.650666
LOC107049692	0.343801	0.019314	0.529963	0.000151989	-0.0967222	0.52253	0.112228	0.457742	-0.0848965	0.574822	-0.0332331	0.826451	-0.0394421	0.794672	0.0408198	0.787663	-0.0328433	0.828456	-0.111126	0.462198	0.137412	0.362475
EEF1D	0.299712	0.0430126	0.528358	0.000160511	-0.203424	0.175116	-0.186433	0.214768	-0.109844	0.467411	0.291273	0.0495348	0.448463	0.00177344	-0.356074	0.0151512	0.213751	0.153759	0.276692	0.0626738	-0.0442827	0.77012
CCDC40	-0.0830378	0.583253	0.526723	0.000169636	-0.16061	0.286302	-0.134229	0.373807	-0.0595425	0.694266	-0.00197285	0.989618	0.466333	0.00108874	-0.349726	0.0171976	0.199953	0.182754	0.400119	0.00586582	0.187707	0.211594
TMSB4Y	0.333487	0.0235226	0.524592	0.000182234	-0.11401	0.450586	-0.118639	0.432285	0.00305567	0.98392	-0.0253387	0.86725	0.550298	7.43058e-05	-0.443525	0.00202023	0.162464	0.280701	0.243512	0.102936	0.151033	0.316377
SLCO1A2	0.423589	0.00335344	0.524089	0.00018533	-0.10633	0.481857	-0.0735928	0.626929	-0.103371	0.494205	-0.0259118	0.864276	0.245382	0.100238	-0.0793343	0.600215	0.139517	0.3551	0.193222	0.198236	0.164745	0.273911
CPSF3	0.0665668	0.66027	0.524053	0.000185556	-0.123721	0.412683	-0.0178777	0.906127	-0.165485	0.27173	0.0633225	0.675892	0.0790059	0.60173	-0.0852028	0.573438	-0.0269186	0.859054	0.000335984	0.998232	0.233509	0.118328
ATPAF2	0.110133	0.466235	0.516842	0.000235544	-0.198699	0.185571	-0.031377	0.836007	-0.0763135	0.614208	0.13561	0.368864	0.508013	0.000313199	-0.47246	0.000915388	0.176054	0.241853	0.229838	0.124393	0.201417	0.179505
PNPLA6	0.478364	0.00077216	0.516785	0.000235986	-0.0863153	0.568424	-0.0697209	0.645217	-0.0820758	0.587638	-0.0648303	0.668614	0.0959649	0.525807	0.0474823	0.754011	0.174228	0.24685	-0.0551613	0.715781	0.203016	0.176001
RAD21L1	0.241949	0.105235	0.515933	0.00024265	-0.0761203	0.615108	-0.0164106	0.9138	-0.0496212	0.743299	0.110184	0.466026	0.056739	0.708007	0.0481611	0.750607	0.061255	0.68592	-0.00291419	0.984665	-0.0532937	0.72502
RAB23	0.105138	0.486812	0.515365	0.000247177	-0.240012	0.108137	-0.180656	0.229571	0.0532956	0.72501	0.184188	0.22044	0.148092	0.326003	-0.186449	0.214726	0.165708	0.271077	0.0715041	0.636767	0.173686	0.248347
MELTF	0.371029	0.0111325	0.513644	0.000261391	-0.0869903	0.565392	-0.237046	0.112698	0.12434	0.410332	0.273609	0.0657801	0.144214	0.338972	-0.187934	0.211031	-0.134575	0.372565	0.0847999	0.575259	0.132686	0.379376
DPAGT1	0.145407	0.33495	0.513018	0.000266742	-0.286707	0.0533845	-0.0572962	0.705269	-0.164792	0.273772	0.201329	0.179697	-0.035295	0.815865	0.0318376	0.833634	0.14433	0.338579	0.0128682	0.932359	-0.276147	0.0632146
SLC4A4	0.474799	0.000856034	0.511176	0.000283061	0.0247193	0.870467	0.0144732	0.923945	-0.168038	0.2643	0.00487112	0.97437	0.527038	0.000167838	-0.407179	0.00497805	0.189185	0.207955	0.17725	0.238619	0.352288	0.0163451
ITSN2	0.207615	0.166205	0.510479	0.000289463	-0.244304	0.101787	-0.284862	0.0550069	0.0298251	0.844015	0.275544	0.0638165	0.195713	0.192402	-0.0204963	0.892453	-0.00580012	0.969484	0.0481901	0.750461	0.326785	0.0266493
NEK1	0.200047	0.182544	0.509404	0.000299602	0.150341	0.318626	-0.152071	0.313025	-0.0554796	0.71421	-0.138713	0.357906	0.104927	0.487691	-0.0189373	0.900591	-0.00708043	0.962752	0.0506495	0.738166	0.288384	0.0519433
PCMT1L	0.14211	0.346138	0.505146	0.000342991	-0.350714	0.0168645	0.008063	0.957587	-0.0818037	0.588881	0.0273633	0.85675	0.437411	0.0023675	-0.234976	0.115969	0.49863	0.000420437	0.143172	0.342511	0.234981	0.115961
ANKDD1B	0.0703016	0.64246	0.505075	0.000343765	0.047291	0.754971	0.118971	0.43099	-0.0882972	0.559542	-0.02389	0.874777	0.0476038	0.753401	-0.134345	0.373391	0.0890592	0.556145	0.0834526	0.581367	-0.0644219	0.670583
C1GALT1	0.256222	0.0856549	0.505074	0.000343775	-0.149689	0.320754	-0.0816363	0.589647	-0.10467	0.488767	-0.0955798	0.527477	0.239566	0.108814	-0.120572	0.424772	0.0351299	0.816711	0.197203	0.188971	0.0251113	0.868431
CDH12	-0.0668289	0.659013	0.503946	0.000356211	-0.131638	0.383185	-0.0795161	0.599378	0.0586168	0.698793	-0.0406056	0.788752	0.101918	0.500328	0.0240609	0.873889	0.0567403	0.708	0.0507463	0.737684	0.375631	0.0100965
TRAF2	0.206942	0.167613	0.501953	0.000379162	-0.16973	0.259451	-0.103645	0.493056	-0.183279	0.222765	-0.142609	0.344431	0.222109	0.137926	-0.0993506	0.511237	0.220903	0.140133	0.179679	0.232143	-0.0505406	0.738709
RB1CC1	-0.465738	0.00110704	-0.500715	0.000394095	0.0626734	0.679035	0.48633	0.000610757	0.00115711	0.993911	-0.0150964	0.92068	-0.519561	0.000215416	0.275327	0.0640348	0.0548212	0.71746	-0.280704	0.0588084	-0.234181	0.117243
SMIM4	0.371604	0.0109981	0.500149	0.0004011	0.00868143	0.954337	-0.12395	0.411814	-0.122617	0.416898	-0.0958657	0.526237	0.381749	0.00884828	-0.191443	0.202478	0.055925	0.712014	0.418533	0.00379532	0.192322	0.200375
CEP97	0.0701641	0.643113	0.50004	0.000402449	-0.07743	0.60902	-0.0582983	0.700353	0.0144343	0.924149	-0.0110789	0.941746	0.0542242	0.720412	-0.158695	0.292159	-0.0140271	0.926283	0.0778436	0.607103	0.290187	0.0504293
TPH2	0.367782	0.0119169	0.499022	0.000415359	-0.0332392	0.82642	-0.0659034	0.663453	-0.0283474	0.851654	-0.0743323	0.62346	0.014782	0.922327	0.140343	0.352229	-0.0886697	0.55788	0.192389	0.200213	0.128589	0.394393
B4GALNT4	-0.0620187	0.68221	0.498497	0.000422165	-0.151713	0.314179	-0.188319	0.210081	-0.0640475	0.672389	-0.180392	0.230265	0.097892	0.517489	-0.101302	0.502934	0.102128	0.499437	-0.0886648	0.557902	-0.115202	0.445836
MTHFD1L	0.05324	0.725286	0.49835	0.000424088	0.0255962	0.865913	0.0338905	0.823073	-0.0199847	0.895122	-0.0814385	0.590552	0.209382	0.162548	-0.102378	0.498385	-0.0881154	0.560354	0.119373	0.429424	0.3569	0.0149008
AGTRAP	0.208063	0.165272	0.496689	0.000446375	-0.257908	0.0835435	-0.0367086	0.808625	-0.079172	0.600964	-0.129412	0.391348	0.478906	0.000760072	-0.301259	0.0418967	0.121443	0.421406	0.161781	0.282755	0.0216514	0.88643
AGL	0.259991	0.0809909	0.495657	0.000460734	-0.139572	0.354909	0.0154797	0.918673	-0.0800309	0.597008	-0.0311246	0.837309	0.172487	0.251677	-0.0573609	0.704951	0.0439617	0.771742	0.0494698	0.744056	0.362484	0.0132989
LOC107049643	0.285771	0.0542029	0.493711	0.000488971	-0.081526	0.590151	-0.0492154	0.745328	-0.0943492	0.532831	-0.0561698	0.710808	-0.0931736	0.537971	0.12532	0.406625	0.191584	0.202139	-0.193662	0.197197	0.0485861	0.748478
LOC107052100	-0.121669	0.420538	0.489273	0.00055926	-0.114501	0.448627	-0.0334406	0.825384	-0.0660643	0.66268	-0.0112634	0.940778	0.323706	0.0281978	-0.261995	0.0785946	0.196775	0.189953	0.239441	0.109005	0.164228	0.27544
TERF2	0.327	0.0265438	0.484274	0.000649214	-0.199661	0.183407	0.0332364	0.826434	-0.10753	0.4769	0.443424	0.00202557	0.132143	0.381345	-0.178515	0.235231	0.0036828	0.980621	0.0643319	0.671017	0.157332	0.296379
ANAPC1	0.20803	0.165341	0.482976	0.000674596	-0.162137	0.281683	-0.0954447	0.528063	-0.140989	0.349996	0.36565	0.0124575	0.445465	0.00191985	-0.359118	0.0142458	0.317371	0.03162	0.234257	0.117121	0.203061	0.175905
CSNK1A1	0.227619	0.128172	0.482886	0.000676399	-0.109113	0.470397	-0.134643	0.37232	0.0421113	0.781108	0.261398	0.0793019	0.462202	0.00122159	-0.572183	3.26055e-05	0.186425	0.214787	0.175205	0.244169	0.159831	0.288676
CMAS	0.254225	0.0882087	0.481111	0.000712636	-0.0875542	0.562864	-0.172328	0.252122	-0.217412	0.146666	0.386873	0.00790764	0.11207	0.458378	-0.0221151	0.884015	0.313507	0.0338713	-0.0455306	0.763826	0.138258	0.359502
ATF6B	0.167717	0.265227	0.480837	0.000718378	-0.307565	0.0375902	0.228882	0.126012	-0.00951446	0.949961	-0.176078	0.241789	0.325676	0.0271988	-0.244875	0.100965	0.19709	0.189229	0.12685	0.400874	0.0109984	0.942169
VWA5B1	0.262745	0.0777111	0.480643	0.000722466	-0.0301054	0.842568	-0.0655714	0.665048	-0.0720098	0.63438	-0.0119716	0.937062	0.27558	0.063781	-0.179877	0.231619	0.0863149	0.568426	0.171123	0.255504	0.327399	0.0263491
COG1	0.295478	0.0461914	0.480436	0.000726868	-0.191975	0.201204	0.0372415	0.805901	-0.252848	0.0900045	0.0150989	0.920667	0.17095	0.25599	0.0447591	0.767715	0.0117033	0.938469	0.0830345	0.583268	-0.0610513	0.686911
DUSP26	-0.00624799	0.967128	0.478827	0.000761819	-0.214169	0.152936	0.442558	0.00207192	-0.168635	0.262581	0.0177928	0.906571	0.408835	0.00478769	-0.307384	0.0377081	0.24725	0.0975976	0.0763513	0.614033	0.267434	0.0723681
HID1	0.129494	0.391049	0.478755	0.000763426	-0.305867	0.0387122	-0.0743248	0.623495	0.237081	0.112644	0.0525741	0.72859	0.0457376	0.762783	0.0822918	0.586652	0.115629	0.444139	0.0674509	0.656036	0.363074	0.0131384
NUFIP2	0.229889	0.124307	0.477995	0.000780471	-0.194332	0.19562	0.0667894	0.659203	-0.0495006	0.743902	0.106934	0.479359	0.161676	0.283073	-0.0648887	0.668333	0.0605646	0.68928	0.135749	0.36837	0.0577786	0.702901
GC	0.43978	0.00222717	0.47538	0.000841819	-0.261998	0.0785905	-0.0726056	0.631571	-0.0442984	0.770041	0.266255	0.073684	0.358362	0.0144663	-0.191751	0.201739	0.226665	0.129822	0.168682	0.262447	0.226179	0.13067
WHSC1L1	0.199338	0.18413	0.474952	0.00085227	-0.109933	0.467046	-0.146719	0.330559	0.176881	0.239614	0.181039	0.228568	0.46482	0.00113583	-0.530252	0.000150496	-0.132931	0.378486	0.262729	0.0777307	0.378591	0.0094749
PFKFB4	0.143085	0.342806	0.473598	0.000886061	-0.0639511	0.672855	0.0399375	0.79215	-0.06311	0.676921	-0.127278	0.399272	0.124373	0.410209	-0.043173	0.77573	0.0462517	0.760195	0.0786498	0.603374	-0.061742	0.683553
FOCAD	0.204885	0.171972	0.472501	0.000914317	0.166655	0.268307	0.0640331	0.672459	-0.178659	0.234847	-0.0540436	0.721305	0.149001	0.32301	-0.148454	0.324809	0.0391458	0.796182	0.0329794	0.827756	0.0298284	0.843998
TNFRSF11B	0.0425079	0.779098	0.471334	0.000945275	-0.160361	0.287057	0.123608	0.413116	0.0728899	0.630233	0.0187787	0.901419	0.0965105	0.523445	-0.253627	0.0889853	0.135232	0.370213	0.0528153	0.727392	0.251541	0.0917342
TRIM32	0.266296	0.0736376	0.470007	0.000981592	-0.238559	0.110354	-0.0429523	0.776847	-0.154615	0.304902	-0.115418	0.444977	0.320858	0.0296964	-0.136812	0.364598	0.329157	0.025505	0.350846	0.0168204	0.0314037	0.835869
LOC101748323	-0.157297	0.296486	0.469852	0.000985905	-0.0869691	0.565487	-0.038582	0.799056	-0.0625894	0.679442	0.0416382	0.783507	0.242114	0.10499	-0.311933	0.0348253	0.175944	0.242155	0.100367	0.506903	0.25688	0.0848254
CRABP1	0.0866405	0.566962	0.467535	0.00105259	-0.160243	0.287418	-0.159513	0.289647	-0.101841	0.500653	-0.146961	0.329754	0.294827	0.0466966	-0.0739998	0.625019	0.173245	0.249567	0.0485074	0.748871	0.0184167	0.90331
ETFRF1	0.0667808	0.659244	0.467448	0.00105517	-0.324005	0.0280443	0.0941192	0.533835	-0.0594443	0.694746	-0.0783232	0.604884	0.511508	0.000280053	-0.243386	0.10312	0.373511	0.0105628	0.301571	0.0416745	0.315483	0.0327038
CLIC4	0.131944	0.382069	0.467219	0.00106199	-0.329789	0.0252074	0.243698	0.102666	0.0522945	0.729979	-0.0714686	0.636935	0.151253	0.315666	-0.0970241	0.521226	0.192947	0.198888	0.0273289	0.856928	0.246718	0.098344
RBBP5	0.193903	0.196628	0.466691	0.00107787	-0.145226	0.335555	0.126088	0.403732	-0.193696	0.197117	0.0449272	0.766868	0.209614	0.162073	-0.0656953	0.664453	0.139749	0.354292	0.204593	0.172596	-0.0730903	0.62929
ZCCHC4	0.170161	0.258225	0.466167	0.00109384	-0.129092	0.392531	-0.0997228	0.509648	-0.14133	0.348819	-0.102564	0.497598	0.321773	0.0292078	-0.205331	0.17102	-0.0631952	0.676508	0.244264	0.101846	0.160247	0.287404
HELQ	-0.15446	0.305393	0.463419	0.00118104	-0.200345	0.18188	-0.138178	0.359782	0.217677	0.146164	-0.0653531	0.666098	0.216663	0.148097	-0.279789	0.059673	0.123919	0.411931	0.161466	0.283707	0.289466	0.0510308
SORL1	0.0233376	0.877651	0.462902	0.00119812	-0.220896	0.140145	0.100615	0.505847	-0.0286304	0.85019	0.198553	0.1859	-0.254549	0.0877896	0.145911	0.333256	0.0424418	0.779433	-0.194986	0.194091	0.0816459	0.589603
TRAPPC9	0.240199	0.107854	0.462654	0.00120639	0.143825	0.340289	-0.304287	0.0397809	0.0462437	0.760235	-0.0795364	0.599284	-0.022439	0.882328	0.0235849	0.876364	-0.0440186	0.771454	0.0296273	0.845037	0.0451844	0.76557
SRGAP2	0.0509936	0.736452	0.460789	0.00127024	-0.268475	0.071222	0.0545333	0.718883	0.367621	0.0119571	0.0720727	0.634083	0.126931	0.400571	-0.06225	0.681087	0.0585162	0.699285	0.23601	0.114326	0.265807	0.074188
MAPK11	-0.204052	0.17376	0.460562	0.0012782	-0.273661	0.0657266	0.390113	0.00735844	-0.271696	0.0677673	-0.10526	0.486305	0.134689	0.372155	0.0172626	0.909343	0.308945	0.0366979	0.028641	0.850135	0.0324368	0.830548
PDCD11	0.0789676	0.601907	0.460369	0.00128504	-0.169247	0.26083	-0.154837	0.3042	0.411461	0.00449879	-0.140248	0.352558	0.151346	0.315367	-0.260584	0.0802762	-0.287259	0.0529063	0.168552	0.262821	0.336688	0.0221413
PURA	0.00942471	0.950433	0.459862	0.00130308	-0.225097	0.132569	0.0434031	0.774566	-0.0733551	0.628045	0.0401455	0.791092	0.229971	0.12417	-0.346389	0.0183643	-0.0284497	0.851125	0.168143	0.263997	0.3269	0.0265926
KIF11	0.0240237	0.874082	0.458854	0.00133966	-0.195831	0.192128	-0.134869	0.37151	-0.174159	0.247039	-0.003295	0.982661	0.373251	0.0106215	-0.0715657	0.636477	0.418912	0.00376051	0.092995	0.538753	0.103746	0.49263
STAT3	0.0513558	0.734647	0.45551	0.00146762	-0.205308	0.171069	-0.137418	0.362457	0.207934	0.16554	-0.190287	0.20527	0.224132	0.134282	-0.188007	0.210852	-0.0158418	0.916777	0.272956	0.0664528	0.177744	0.237292
CCDC73	0.352102	0.0164058	0.455217	0.00147934	0.195452	0.193007	-0.134324	0.373465	-0.153737	0.307689	-0.0754852	0.618069	0.156584	0.298709	0.0444739	0.769155	-0.239463	0.10897	0.0931095	0.538251	0.244744	0.101153
PRMT7	0.0662642	0.661721	0.454285	0.00151715	-0.0989002	0.513164	-0.0557721	0.712768	-0.073252	0.62853	-0.0524222	0.729344	0.175547	0.243236	-0.0114455	0.939822	0.00366467	0.980716	0.108072	0.474667	0.195061	0.193917
TMEM50B	0.270808	0.0687066	0.450201	0.00169321	-0.300324	0.0425686	-0.238583	0.110317	-0.0897247	0.553186	0.0830826	0.583049	0.419211	0.00373328	-0.0649256	0.668156	0.159955	0.288295	0.312421	0.0345276	0.2729	0.0665107
ADPGK	0.0455899	0.763527	0.446574	0.0018645	-0.188511	0.209608	-0.135851	0.368009	-0.134325	0.373463	-0.0881552	0.560177	0.53939	0.0001097	-0.200421	0.18171	0.431054	0.00278363	0.243792	0.10253	0.302655	0.0409101
IL1R2	-0.0348352	0.818223	0.445934	0.00189627	-0.290312	0.0503258	-0.168663	0.262502	0.123381	0.413981	0.140698	0.351002	0.185961	0.21595	-0.286945	0.0531784	0.191027	0.20348	0.388473	0.00763221	0.325028	0.027524
PAK6	-0.0190232	0.900142	0.445307	0.00192785	-0.120974	0.423218	0.0044594	0.976535	-0.145319	0.335244	-0.0452668	0.765155	0.196257	0.191144	-0.20438	0.173054	0.193752	0.196984	-0.106077	0.48291	0.175524	0.243297
PREP	0.139479	0.355232	0.442334	0.0020841	-0.169729	0.259453	0.0338591	0.823234	0.266432	0.0734855	-0.025358	0.86715	0.027292	0.857119	-0.235537	0.115074	-0.0574967	0.704284	0.108355	0.473504	-0.155908	0.300828
AMBRA1	0.308291	0.0371186	0.44164	0.00212215	-0.0591258	0.696303	-0.0733942	0.627861	-0.0920878	0.542739	-0.0430004	0.776604	0.367898	0.0118881	-0.154518	0.305209	0.0568075	0.70767	0.317663	0.0314552	0.172681	0.251136
GADL1	0.260951	0.0798353	0.441291	0.00214151	-0.233105	0.118984	0.185739	0.21651	0.00338366	0.982195	0.0517694	0.732589	0.0583385	0.700156	-0.0555617	0.713805	0.0399834	0.791916	0.15268	0.311069	0.109648	0.468211
TCP11L1	-0.162155	0.281628	0.440088	0.00220945	-0.0722503	0.633245	-0.142903	0.343427	0.248122	0.0963828	-0.0120798	0.936494	0.0729631	0.629888	-0.107205	0.47824	-0.257825	0.0836457	0.0528797	0.727073	0.207265	0.166937
CADM1	0.35083	0.0168259	0.439926	0.00221875	-0.0858856	0.570358	-0.0346211	0.819321	-0.189797	0.20646	0.252515	0.0904432	-0.194428	0.195397	0.264389	0.0758037	-0.231243	0.122045	-0.0648129	0.668698	0.0947659	0.531015
PRELID3A	0.0523052	0.729925	0.439605	0.00223728	-0.167249	0.266583	-0.0962555	0.524548	-0.0963723	0.524043	-0.113504	0.452612	0.320698	0.0297824	-0.322211	0.0289763	0.17351	0.248834	0.0687609	0.649784	-0.105394	0.485746
IST1	0.385036	0.00823431	0.438945	0.00227574	0.329419	0.0253813	-0.192563	0.199801	-0.082627	0.585124	-0.126842	0.400902	0.133381	0.37686	-0.00250346	0.986826	-0.0223375	0.882856	-0.0504481	0.739171	0.258225	0.0831505
DDI2	0.173379	0.249197	0.438843	0.00228175	-0.238419	0.110569	-0.187022	0.213297	-0.197996	0.187162	0.286288	0.0537497	0.216466	0.148477	-0.233131	0.118942	0.0635739	0.674677	0.204506	0.172783	0.0895454	0.553982
LOC772071	0.0130693	0.931304	0.438374	0.00230953	-0.177223	0.238694	0.0584914	0.699407	-0.0849659	0.574508	0.0227875	0.880513	0.19648	0.19063	-0.167492	0.265877	-0.0619138	0.682719	0.336458	0.0222382	0.126093	0.403715
RPL23A	0.117857	0.435348	0.438057	0.00232849	-0.202051	0.178108	-0.00951384	0.949964	-0.183669	0.221766	-0.0461769	0.760572	0.760222	8.88097e-10	-0.518654	0.000221955	0.374217	0.0104055	0.379294	0.00933208	0.221293	0.139415
KCNS1	0.162363	0.281005	0.437687	0.00235079	-0.122897	0.415827	-0.130409	0.387678	0.245111	0.100626	0.273207	0.0661941	-0.0757153	0.616996	-0.0797668	0.598224	0.158304	0.293366	-0.176301	0.241184	0.146544	0.33114
NEK4	0.209633	0.162034	0.437684	0.00235098	-0.093524	0.536436	0.292588	0.0484693	-0.12495	0.408023	-0.0299101	0.843576	0.137306	0.36285	-0.0476807	0.753015	0.0587771	0.698008	0.155944	0.300714	0.163555	0.27744
NCEH1	0.117338	0.437387	0.436856	0.00240154	-0.145024	0.336237	0.0110504	0.941896	-0.175096	0.244466	0.00788109	0.958543	0.122908	0.415787	-0.0293744	0.846344	-0.142525	0.344719	0.068816	0.649521	0.147129	0.329193
XPO7	0.10371	0.492783	0.435309	0.00249859	-0.13789	0.360792	-0.03334	0.825901	0.0583202	0.700246	-0.0328406	0.82847	0.310632	0.035631	-0.316204	0.0322863	-0.0363683	0.810367	0.072043	0.634223	0.479837	0.000739708
PCDH7	-0.109315	0.469569	-0.435092	0.00251244	0.473698	0.000883527	-0.151471	0.314962	0.052639	0.728268	-0.331783	0.0242868	-0.229142	0.125569	0.205365	0.170947	-0.15082	0.317071	-0.350211	0.0170336	-0.144381	0.338407
CAMK4L	0.351926	0.0164634	0.434875	0.00252644	-0.0829597	0.583608	-0.00572238	0.969892	-0.235785	0.114682	0.1301	0.388814	0.471139	0.000950531	-0.435545	0.00248355	0.305445	0.0389955	0.208252	0.16488	-0.155077	0.303442
RPL26L1	0.140222	0.35265	0.434315	0.00256274	-0.202421	0.177298	-0.00295961	0.984426	-0.127873	0.397056	0.0013984	0.992641	0.747589	2.38204e-09	-0.580579	2.33979e-05	0.484717	0.000640751	0.342266	0.0198972	0.0264087	0.861697
PSRC1	0.08879	0.557344	0.434262	0.00256623	-0.043436	0.774399	-0.0812946	0.59121	0.229892	0.124302	-0.0799274	0.597485	0.17419	0.246954	-0.271456	0.0680211	0.0878434	0.56157	0.0759958	0.615688	-0.10428	0.490394
ZFX	0.155759	0.301294	0.433371	0.00262505	-0.0818262	0.588778	-0.0349404	0.817683	-0.179671	0.232163	0.251338	0.0920061	0.160713	0.285987	0.0724589	0.632262	0.269329	0.0702937	-0.0759822	0.615752	0.148245	0.325497
SDHAF2	0.0975451	0.518981	0.432362	0.00269308	-0.205293	0.1711	0.165937	0.270405	-0.2016	0.179101	-0.131458	0.383841	0.580783	2.3207e-05	-0.269103	0.0705384	0.532848	0.000137695	0.201282	0.179801	0.139608	0.354784
AK1	0.246267	0.0989805	0.432157	0.00270707	-0.109487	0.468868	-0.243677	0.102696	-0.217771	0.145985	0.121197	0.422355	0.756695	1.17675e-09	-0.41528	0.00410593	0.344464	0.0190668	0.53785	0.000115777	0.269535	0.0700706
EPHB1	0.150025	0.319658	0.432013	0.00271697	0.0814092	0.590685	0.0489794	0.746509	-0.0788283	0.60255	0.0356872	0.813855	0.0545024	0.719036	-0.000778764	0.995902	-0.0593216	0.695346	0.11062	0.464253	0.214082	0.153109
NEU4	0.223611	0.135214	0.431257	0.00276935	-0.215551	0.150241	0.224449	0.133718	-0.0539376	0.72183	-0.0383655	0.80016	0.294894	0.0466444	-0.371371	0.0110524	0.244794	0.101081	0.166531	0.268671	-0.036212	0.811167
AXIN1	-0.0650193	0.667704	0.431214	0.00277242	-0.109594	0.46843	-0.0944885	0.532223	-0.0613574	0.685422	-0.095031	0.529861	0.152824	0.310606	-0.224805	0.133087	0.241908	0.105296	-0.218949	0.143763	-0.12192	0.419574
GRIA1	0.264638	0.0755185	0.43047	0.00282486	-0.109953	0.466964	0.103505	0.493644	0.0239805	0.874307	0.223272	0.135821	-0.34717	0.0180852	0.189424	0.20737	-0.220073	0.141666	-0.111803	0.45946	0.103084	0.495411
PALLD	0.115347	0.445259	0.430196	0.00284443	-0.0871574	0.564642	-0.110906	0.463091	0.325842	0.0271158	-0.0955396	0.527651	0.220521	0.140836	-0.3445	0.0190538	-0.131353	0.384223	0.080483	0.594931	0.0772381	0.609911
UBA7	0.0894334	0.55448	0.430119	0.00284993	-0.281574	0.057996	0.190139	0.205627	0.15013	0.319314	0.366335	0.0122817	-0.00559067	0.970585	-0.0722253	0.633363	-0.0172078	0.90963	0.0510647	0.736097	0.201377	0.179591
BNC2	0.042324	0.78003	0.429705	0.00287976	-0.20068	0.181135	-0.1817	0.226844	0.0647589	0.668959	-0.106076	0.482912	0.365735	0.0124356	-0.289869	0.0506939	0.135695	0.368561	0.128875	0.393333	0.369031	0.0116099
IQSEC1	-0.154034	0.306746	-0.429684	0.00288128	0.313939	0.0336133	0.0393485	0.795149	0.0627214	0.678802	-0.164076	0.275892	-0.179347	0.233022	0.238176	0.110944	-0.0424518	0.779382	-0.22956	0.124862	0.138388	0.359044
MEIOB	0.175479	0.243421	0.42909	0.00292454	-0.0356827	0.813878	0.0220095	0.884565	-0.0380276	0.801885	-0.055479	0.714213	0.354788	0.0155481	-0.252974	0.0898389	0.00265093	0.98605	0.00838442	0.955898	0.113721	0.451741
PPP2R2B	0.0172847	0.909228	0.42722	0.00306456	-0.361413	0.0135941	-0.0716386	0.636132	0.138875	0.357339	0.15555	0.301953	0.238738	0.110079	-0.183633	0.221857	-0.0162648	0.914563	-0.00346973	0.981742	0.540098	0.000107004
SMTN	-0.0625625	0.679572	0.426052	0.00315501	-0.0757364	0.616898	-0.0447318	0.767853	-0.0445826	0.768606	-0.0402102	0.790762	0.365624	0.0124642	-0.40121	0.00572026	0.0694659	0.646429	-0.0138776	0.927066	0.179831	0.231741
OGFR	0.177213	0.23872	0.425126	0.00322836	-0.107209	0.478224	0.0499486	0.741664	-0.0737946	0.625982	-0.0284095	0.851333	0.200814	0.180838	-0.11509	0.446279	-0.0415743	0.783831	0.12487	0.408326	0.244887	0.100947
L3MBTL1	0.0659798	0.663086	0.424893	0.00324701	0.0107506	0.94347	0.0388128	0.797879	-0.0197427	0.896385	-0.0413108	0.785169	0.226537	0.130045	-0.150182	0.319146	-0.100033	0.508324	0.108443	0.473144	0.191465	0.202426
SLC38A4	0.187358	0.21246	0.424761	0.00325771	0.345735	0.0186005	-0.137122	0.363499	-0.186675	0.214163	-0.134165	0.374038	0.0177774	0.906652	-0.186496	0.214609	-0.115096	0.446255	-0.0639053	0.673076	-0.236313	0.113848
CREB3L1	-0.0554042	0.714582	0.424498	0.00327895	-0.0944951	0.532195	-0.0631354	0.676798	-0.0995806	0.510255	-0.0940853	0.533982	0.283086	0.0566055	-0.308091	0.0372476	-0.0386935	0.798487	0.0544809	0.719142	-0.0201402	0.894311
FOXRED2	-0.0154956	0.91859	0.423221	0.00338396	0.0328065	0.828645	-0.0602843	0.690646	-0.0829966	0.58344	-0.0534263	0.724363	0.00598403	0.968516	0.0289032	0.848779	-0.0267274	0.860045	0.0377366	0.803371	0.0714488	0.637029
ANKS6	-0.101822	0.500731	0.422548	0.00344048	-0.0429025	0.777099	0.143994	0.339717	-0.152673	0.311091	-0.136825	0.364549	0.182259	0.225394	-0.285123	0.054775	0.111755	0.459652	0.187888	0.211147	0.0498916	0.741948
KLHL3	0.184039	0.220819	0.42165	0.00351724	-0.112056	0.458436	-0.0588151	0.697822	-0.0943057	0.533021	0.00939022	0.950614	0.331646	0.0243493	-0.128134	0.396084	0.0900255	0.551851	0.312523	0.0344652	0.270565	0.0689651
SNX24	-0.101905	0.500382	0.42068	0.00360175	-0.0862147	0.568876	-0.200239	0.182115	0.0605525	0.689339	-0.123883	0.412069	0.338749	0.0212884	-0.204386	0.173041	0.322772	0.028682	0.105547	0.485108	0.0948038	0.53085
S100B	-0.0245276	0.871463	0.419915	0.00366975	-0.268564	0.0711253	-0.0683246	0.651864	0.153446	0.308618	0.0720954	0.633976	0.284488	0.0553401	-0.268279	0.0714368	0.0524355	0.729278	0.186679	0.214153	0.0990564	0.512495
RCSD1	0.0982705	0.515863	0.419663	0.00369231	-0.126643	0.40165	-0.0666075	0.660074	-0.0349746	0.817508	0.00767421	0.95963	0.262599	0.0778828	-0.248317	0.0961133	0.100097	0.508052	0.109267	0.469767	0.203809	0.174284
TMEM19	0.0465631	0.758629	0.419314	0.0037239	-0.0814911	0.590311	-0.0442575	0.770247	0.356372	0.0150606	-0.10929	0.469671	0.239353	0.109139	-0.366108	0.0123398	0.0995378	0.510438	0.127355	0.398984	0.0896312	0.553601
PTPN2	0.0728187	0.630568	0.418973	0.00375496	-0.050755	0.73764	0.0840301	0.578745	-0.107467	0.477157	-0.127412	0.398773	0.184177	0.220468	-0.263396	0.076952	-0.121567	0.42093	0.299832	0.0429257	-0.0241408	0.873474
SORBS2	0.134932	0.371288	0.418474	0.00380081	-0.0208069	0.890833	0.242246	0.104795	-0.0688793	0.64922	-0.0498257	0.742278	-0.0579163	0.702225	0.0189171	0.900696	0.0909087	0.54794	-0.084611	0.576113	-0.143882	0.340096
LMAN2L	-0.175261	0.244015	-0.417441	0.00389724	0.29397	0.0473691	-0.21731	0.146862	0.0606398	0.688914	-0.153327	0.308997	-0.0477197	0.75282	0.151328	0.315425	-0.167101	0.267012	0.0221458	0.883855	-0.0382187	0.80091
ITFG1	-0.1623	0.281193	-0.416369	0.00399955	0.0919754	0.543233	-0.0983051	0.515714	-0.172379	0.251979	-0.0983241	0.515633	-0.027625	0.855394	0.0534318	0.724335	-0.152406	0.311948	-0.13782	0.36104	-0.146478	0.331363
OGDH	0.0339411	0.822813	0.416116	0.00402401	-0.160161	0.287667	0.0781551	0.605661	0.000456218	0.997599	0.140377	0.352111	0.406343	0.00507667	-0.435937	0.00245877	0.0303999	0.841047	0.112958	0.454804	0.152441	0.311835
RNF152	0.0879763	0.560976	0.415356	0.00409848	-0.256751	0.0849876	-0.00261431	0.986243	0.394203	0.00671277	0.00719267	0.962162	-0.169558	0.259941	0.169577	0.259886	-0.243855	0.102438	0.0983231	0.515637	0.349127	0.0174024
LOC769726	0.277935	0.061455	0.414226	0.00421126	-0.0222804	0.883154	-0.22244	0.137325	0.0466816	0.758033	0.101213	0.50331	0.459045	0.00133268	-0.431119	0.00277901	0.0431645	0.775773	0.303924	0.0400303	-0.152193	0.312633
ARL8BL	0.048576	0.748528	-0.413167	0.00431943	-0.163166	0.2786	-0.156583	0.298711	0.11114	0.462143	0.297695	0.0445043	-0.227978	0.127555	0.23149	0.121635	-0.230837	0.122721	-0.215385	0.150563	-0.262796	0.0776515
ARF1	0.247045	0.0978842	0.412053	0.00443587	0.0375397	0.804377	-0.15526	0.302866	-0.261792	0.0788347	-0.103632	0.493107	0.571046	3.40807e-05	-0.346567	0.0183004	0.191867	0.201461	0.417853	0.0038585	0.148899	0.323343
RNF180	-0.0764883	0.613395	0.411871	0.0044551	-0.0838709	0.579467	-0.105483	0.485375	-0.0765918	0.612914	-0.0843136	0.57746	0.0328064	0.828646	0.0475095	0.753875	0.220431	0.141003	0.24314	0.10348	0.174542	0.245987
ADAT2	0.131389	0.384091	0.411814	0.00446121	-0.195423	0.193074	0.298948	0.043573	-0.330577	0.0248404	-0.0218202	0.885551	0.445159	0.00193541	-0.335938	0.0224588	0.350179	0.0170441	0.270835	0.068678	-0.00124987	0.993423
TSPO	0.533354	0.000135315	0.411458	0.0044991	-0.0756437	0.61733	-0.224158	0.134237	-0.114061	0.450384	0.295933	0.0458414	0.426234	0.00314079	-0.189058	0.208266	0.169374	0.260465	0.362741	0.0132288	0.0698554	0.644578
KMT2C	0.00334051	0.982422	0.411382	0.00450731	-0.0468103	0.757386	0.11039	0.465187	0.0553361	0.714918	-0.0748281	0.62114	-0.167814	0.264947	0.167138	0.266905	-0.001326	0.993022	0.00577257	0.969628	0.171199	0.255289
UBE2E3	0.023817	0.875157	0.411309	0.00451507	0.200409	0.181736	-0.232008	0.120781	0.0371367	0.806436	0.145712	0.333925	0.171062	0.255676	-0.184957	0.218485	-0.0480359	0.751234	0.166322	0.269279	0.413748	0.00425974
MOB3B	-0.131295	0.384437	0.411036	0.0045445	-0.214455	0.152376	-0.0958557	0.52628	-0.20207	0.178067	0.269457	0.0701551	0.240007	0.108144	-0.219779	0.142213	0.175759	0.242656	0.354783	0.0155499	0.439895	0.00222054
UBN2	0.0502102	0.740358	-0.410737	0.00457688	0.261365	0.0793415	-0.281193	0.0583514	0.241299	0.106202	0.247371	0.0974282	-0.507334	0.000320034	0.27575	0.06361	-0.259422	0.0816824	-0.202985	0.176069	-0.150519	0.318048
MAPK8IP1	0.0297889	0.844202	-0.410268	0.00462812	0.0073281	0.96145	0.176118	0.241679	-0.27033	0.0692165	0.1992	0.18444	0.0800415	0.59696	-0.0795016	0.599444	0.127869	0.397068	0.0726384	0.631417	-0.158006	0.294288
SIDT2	0.00197472	0.989608	0.40982	0.00467754	-0.0440623	0.771234	-0.135254	0.370136	-0.148194	0.325666	0.162473	0.280674	0.270129	0.0694318	-0.309425	0.0363916	0.0190657	0.89992	0.0323763	0.83086	0.265185	0.0748935
MAPT	-0.0715978	0.636325	-0.409053	0.00476308	0.345718	0.0186067	-0.249342	0.0947041	-0.191177	0.203117	-0.362602	0.0132666	-0.196396	0.190823	0.177447	0.238089	-0.194846	0.194418	0.0643225	0.671062	-0.192485	0.199986
PDE1A	0.222622	0.136994	0.408996	0.00476953	-0.0978708	0.51758	-0.0816261	0.589693	-0.0673818	0.656367	0.0154218	0.918976	0.243968	0.102274	-0.145341	0.335169	0.0217477	0.885929	0.329927	0.0251427	0.100449	0.506555
NDST1	0.136239	0.366628	0.407826	0.00490297	-0.182216	0.225506	-0.0191508	0.899476	0.121894	0.419674	-0.107538	0.476866	0.347951	0.01781	-0.171356	0.254847	0.148313	0.325273	0.332354	0.0240284	0.250837	0.0926779
SYNJ2BP	-0.0589497	0.697164	-0.407643	0.00492412	0.0876764	0.562318	-0.128155	0.396006	0.184648	0.219268	0.0678404	0.654175	-0.0164765	0.913456	-0.0501831	0.740493	-0.0895505	0.55396	0.128802	0.393606	0.0129977	0.931679
GABRP	-0.0179261	0.905874	0.407367	0.00495616	-0.0970508	0.521112	-0.0593073	0.695415	-0.0591835	0.696021	-0.0439334	0.771885	0.291266	0.0495405	-0.274923	0.0644415	0.159956	0.288292	0.105735	0.484328	0.0917048	0.544425
ARHGEF10	-0.158866	0.291635	-0.406941	0.00500603	0.0725318	0.631918	0.0198916	0.895608	0.0266132	0.860637	-0.220242	0.141353	-0.168762	0.262218	0.318767	0.0308375	0.146136	0.332505	0.0314272	0.835748	0.0730881	0.6293
CORO2B	0.0510938	0.735952	0.40565	0.00515964	-0.20372	0.174475	0.424604	0.00327038	-0.0184166	0.903311	-0.117861	0.435333	0.0110098	0.942109	-0.0465457	0.758716	0.221295	0.139411	-0.129145	0.392336	0.206851	0.167805
DAB2IP	0.0799794	0.597246	0.405076	0.0052294	-0.106036	0.483077	0.0833366	0.581894	0.190318	0.205194	-0.064649	0.669488	-0.273311	0.0660863	0.374299	0.0103875	-0.172898	0.250532	-0.0465008	0.758942	0.352684	0.0162168
TYMS	0.188753	0.209015	0.40496	0.00524358	-0.0340417	0.822296	0.00241096	0.987313	-0.197488	0.18832	-0.145531	0.334532	0.501169	0.000388566	-0.386757	0.0079278	0.202598	0.176913	0.272893	0.0665184	0.0987845	0.513659
CENPX	0.227911	0.127671	0.404769	0.00526696	-0.182588	0.224545	-0.144489	0.33804	-0.0987911	0.51363	0.136496	0.365715	0.670455	3.4432e-07	-0.589576	1.62278e-05	0.261699	0.0789448	0.292958	0.0481722	0.107228	0.478146
VTN	0.299747	0.0429874	0.404478	0.00530277	-0.141966	0.346632	0.0675314	0.655651	-0.334837	0.0229317	-0.062147	0.681587	0.426833	0.00309426	-0.165	0.273159	0.200387	0.181786	0.36162	0.0135368	0.055209	0.715545
NPR3	0.175308	0.243886	0.403339	0.00544513	-0.184764	0.218975	0.173361	0.249246	-0.235183	0.115638	-0.0429194	0.777013	0.00709064	0.962698	-0.0020205	0.989367	0.0175312	0.907939	0.058502	0.699355	-0.267391	0.0724162
MOSPD2	0.0140592	0.926114	0.402981	0.00549055	-0.193192	0.198307	0.067705	0.654822	-0.276363	0.063	-0.0563911	0.709719	0.336349	0.0222843	-0.265144	0.0749407	0.146997	0.329632	-0.00964289	0.949286	-0.0676913	0.654887
RDM1	0.011382	0.940156	0.401911	0.00562838	0.0992858	0.511514	-0.128827	0.393511	-0.100088	0.508091	-0.0635003	0.675033	0.212911	0.155421	-0.224823	0.133054	0.148657	0.324141	0.229198	0.125474	0.17767	0.237492
GPX4	0.138965	0.357026	0.401368	0.00569936	-0.128688	0.394027	-0.0419315	0.782019	-0.133731	0.375599	0.126914	0.400635	0.751395	1.78044e-09	-0.690158	1.11796e-07	0.450197	0.00169336	0.482019	0.000693888	0.0840803	0.578517
ACOX3	-0.0625993	0.679394	0.401243	0.00571587	-0.0618007	0.683268	-0.0501379	0.740719	-0.0443758	0.76965	-0.0084772	0.95541	0.277815	0.0615725	-0.378112	0.00957306	0.0391621	0.796099	0.177456	0.238066	0.249177	0.0949293
NEDD4L	0.19576	0.192293	0.400221	0.00585211	-0.203321	0.175339	0.142648	0.344298	-0.16869	0.262424	-0.145685	0.334015	0.371936	0.0109212	-0.120708	0.424246	0.185805	0.216343	0.466869	0.0010725	0.125194	0.407101
AARS2	0.0785132	0.604005	0.399877	0.00589853	-0.0547815	0.717656	-0.0605792	0.689209	-0.0612671	0.685861	-0.0400325	0.791667	0.110757	0.463693	0.0475667	0.753588	0.11536	0.445206	0.0959957	0.525673	0.269637	0.0699608
RALBP1	0.0346003	0.819428	-0.399318	0.00597476	0.207783	0.165855	0.133641	0.375922	-0.379045	0.00938251	0.131526	0.383591	0.117852	0.435367	-0.0647633	0.668937	0.0760058	0.615642	0.0488633	0.74709	-0.167569	0.265656
SLC12A4	0.249156	0.0949584	0.398278	0.00611883	-0.184854	0.218745	0.0619198	0.68269	-0.2127	0.155841	0.0597036	0.693479	0.206752	0.168013	-0.04131	0.785173	0.106052	0.483011	-0.091273	0.54633	0.031682	0.834435
RNF151	0.109322	0.469543	0.397904	0.00617128	-0.177175	0.238821	-0.146957	0.329767	-0.143544	0.341242	0.309706	0.0362135	0.183052	0.223349	0.0148323	0.922064	-0.0302284	0.841932	0.233814	0.117835	0.381922	0.00881502
ATP9A	0.0549318	0.716914	-0.397066	0.00629053	0.259441	0.0816588	0.187513	0.212075	0.0381211	0.801407	-0.0773155	0.609552	-0.559203	5.35182e-05	0.540461	0.000105645	-0.414001	0.00423399	-0.24705	0.097877	-0.0931976	0.537865
LOC101747587	0.00742297	0.960951	0.395767	0.00647911	-0.241662	0.105661	0.00622462	0.967251	-0.184597	0.219399	-0.118222	0.43392	0.650494	9.9073e-07	-0.574066	3.02908e-05	0.469857	0.000985763	0.375287	0.010171	-0.145015	0.336266
GALNT16	0.0912897	0.546256	0.395054	0.00658473	-0.0383116	0.800436	-0.0398357	0.792668	-0.0773931	0.609192	0.322332	0.0289127	-0.050035	0.741232	0.131688	0.383	0.0537067	0.722973	0.160856	0.285554	0.0552349	0.715417
TBCE	0.119017	0.43081	0.394572	0.00665697	-0.202279	0.17761	0.239753	0.10853	-0.114519	0.448553	-0.0224713	0.88216	0.333887	0.0233462	-0.331128	0.0245861	0.170808	0.256393	0.235328	0.115407	0.237975	0.111254
PM20D1	0.0621157	0.681739	0.394533	0.00666287	-0.192588	0.19974	-0.0475675	0.753583	-0.0164867	0.913402	0.0645664	0.669886	0.0669118	0.658617	0.0872033	0.564437	0.0810454	0.592351	0.19445	0.195345	0.129981	0.389251
RPL30	0.0705566	0.641252	0.39352	0.006817	-0.404053	0.00535552	0.0478735	0.752049	-0.0243586	0.872341	-0.0973047	0.520017	0.760407	8.74956e-10	-0.548716	7.86919e-05	0.510955	0.000285078	0.411883	0.00445388	0.134696	0.372132
UNC119	-0.311244	0.03525	-0.393292	0.00685212	0.0447332	0.767846	0.15938	0.290056	-0.0926683	0.540187	-0.0850881	0.573956	-0.255474	0.086604	0.139781	0.354182	-0.0275368	0.855851	-0.331051	0.0246215	-0.183472	0.22227
ZMYM3	-0.0850667	0.574053	0.392099	0.00703847	0.139613	0.354765	-0.257341	0.084249	0.120185	0.426268	-0.216911	0.147623	0.329253	0.02546	-0.318617	0.0309209	-0.0483076	0.749873	-0.0910178	0.547457	0.119495	0.428951
RC3H1	-0.200192	0.182219	0.391844	0.00707892	-0.131505	0.383667	-0.0168651	0.911423	-0.171447	0.25459	-0.158777	0.291909	0.133065	0.378001	-0.0745305	0.622532	0.0312642	0.836588	0.0220725	0.884236	0.267571	0.0722163
RIOK3	0.292054	0.0488992	0.390694	0.00726361	0.306868	0.0380474	-0.0446708	0.768161	-0.211853	0.157534	-0.16459	0.274367	0.153798	0.307496	-0.127136	0.399804	-0.0255861	0.865966	0.186047	0.215735	0.21426	0.152758
C5orf24	0.0411944	0.78576	0.390441	0.00730477	-0.326193	0.0269412	-0.214261	0.152756	0.0977607	0.518053	0.154497	0.305277	0.043883	0.77214	0.21717	0.147129	-0.0906366	0.549143	0.256784	0.0849456	0.489266	0.000559386
TMEM266	-0.035657	0.814009	0.390417	0.00730875	0.117858	0.435346	-0.239761	0.108517	0.222576	0.137077	0.106576	0.480839	0.011048	0.941908	-0.173404	0.249126	-0.194342	0.195598	0.151942	0.313443	0.0839045	0.579315
DSP	0.057279	0.705353	0.390068	0.00736583	0.0382182	0.800912	-0.161547	0.283461	-0.156861	0.297844	-0.110811	0.463476	0.105313	0.486084	0.0376635	0.803744	0.0632877	0.676061	-0.101964	0.500134	0.270199	0.0693561
GPD2	0.0541732	0.720664	-0.3885	0.00762751	0.190199	0.205484	-0.123879	0.412085	0.27137	0.0681111	-0.14952	0.321307	-0.436316	0.00243499	0.621503	4.03589e-06	-0.146561	0.331086	-0.423497	0.00336102	-0.215074	0.151168
KLF7	-0.226152	0.130716	0.387835	0.007741	-0.255238	0.0869058	-0.083996	0.5789	0.278787	0.0606307	-0.158091	0.294026	0.199627	0.183483	-0.224231	0.134106	0.0159595	0.916161	0.15928	0.290362	0.186748	0.21398
LOC121107689	0.255636	0.0863979	0.387525	0.0077943	-0.270176	0.069381	0.0275039	0.856021	0.113185	0.453893	0.110123	0.466274	0.322727	0.0287058	-0.320511	0.029883	0.239813	0.108438	-0.0378096	0.802998	-0.0321136	0.832212
MTFR1	-0.0291458	0.847525	0.387045	0.00787762	-0.157874	0.294698	-0.0603964	0.6901	-0.0931904	0.537897	-0.0397841	0.792931	0.581934	2.21581e-05	-0.594254	1.3358e-05	0.25659	0.08519	0.2972	0.0448763	0.170827	0.256338
IGF2BP2	0.429055	0.00292715	0.387021	0.00788179	0.273443	0.0659506	-0.10976	0.467753	-0.131754	0.38276	-0.0475065	0.75389	0.132491	0.380081	-0.017312	0.909085	-0.0935253	0.53643	-0.0515442	0.73371	0.260225	0.0807089
LOC107049870	0.188256	0.210237	0.386677	0.00794197	-0.0831952	0.582537	0.468744	0.00101732	-0.096764	0.522349	-0.0733478	0.628079	-0.295222	0.0463895	0.157447	0.29602	-0.115678	0.443945	-0.0582007	0.700831	0.071981	0.634515
APOA1	0.121996	0.41928	0.386167	0.00803176	-0.335749	0.0225392	0.113089	0.454276	-0.0617022	0.683746	-0.0368243	0.808034	0.361853	0.0134723	-0.385881	0.00808261	0.338017	0.0215881	-0.0265045	0.861201	-0.193488	0.197606
LINGO3	0.213752	0.153757	0.385225	0.00820026	-0.026513	0.861157	-0.0468667	0.757103	-0.0975162	0.519106	-0.0156688	0.917683	0.386342	0.00800081	-0.250335	0.0933544	0.0337631	0.823727	0.106289	0.482028	0.107476	0.47712
TSPAN7	-0.107824	0.475689	0.384907	0.00825783	-0.176659	0.240214	-0.0312859	0.836477	-0.0314785	0.835484	-0.157389	0.296202	0.2126	0.15604	-0.20584	0.169938	0.104554	0.48925	-0.00928466	0.951168	0.227921	0.127653
ZNF335	0.257944	0.0834985	0.384484	0.00833477	-0.114903	0.447023	-0.0691965	0.64771	-0.142997	0.343105	0.230882	0.122646	0.436299	0.00243611	-0.348816	0.0175094	0.182066	0.225894	-0.0227281	0.880823	0.0561992	0.710663
SEC23IP	0.195189	0.193619	0.384329	0.00836313	-0.124526	0.409628	-0.117597	0.436369	0.0981952	0.516186	0.141554	0.348049	0.0868369	0.56608	0.0279385	0.853771	-0.212085	0.157068	0.135423	0.369533	0.316472	0.0321325
MORF4L2	0.0588894	0.697459	-0.38396	0.0084312	0.290128	0.0504788	0.28495	0.0549286	0.0342738	0.821104	0.0711706	0.638344	-0.556379	5.94484e-05	0.512437	0.000271788	-0.129127	0.392401	-0.303846	0.0400834	-0.157628	0.295459
ANKRD42	-0.154912	0.303964	0.383589	0.00849984	-0.0344013	0.820449	-0.0189339	0.900608	-0.00995956	0.947623	0.0687014	0.650067	0.0111501	0.941373	-0.0602993	0.690573	-0.0348209	0.818296	0.167577	0.265632	0.300057	0.0427617
PPM1E	0.112886	0.455093	0.383525	0.00851192	-0.231289	0.121969	0.471	0.000954305	-0.012941	0.931977	-0.266938	0.0729196	-0.0401423	0.791108	0.012479	0.9344	-0.105536	0.485158	-0.013926	0.926813	0.150935	0.316695
LOC107052650	0.120318	0.425754	0.383514	0.00851394	-0.0887811	0.557384	-0.230093	0.123966	-0.152332	0.312186	0.426701	0.00310448	0.099763	0.509476	-0.147785	0.327017	0.166795	0.2679	-0.234766	0.116304	0.0678449	0.654153
PPIL3	-0.0422159	0.780578	0.383186	0.00857519	-0.247002	0.0979452	0.00562881	0.970384	0.106726	0.480219	-0.0128682	0.932359	0.225036	0.132678	-0.192698	0.199478	0.106813	0.479859	0.37311	0.0106531	0.0616398	0.684049
CTNNBL1	-0.0365812	0.809277	-0.382891	0.00863069	0.362908	0.0131835	0.0818898	0.588488	-0.0134245	0.929442	-0.414894	0.00414423	-0.222232	0.137701	0.0207042	0.891368	-0.0624458	0.680138	-0.0945691	0.531872	-0.378264	0.00954177
SLC7A3	0.186247	0.215233	0.382844	0.00863957	-0.242778	0.10401	0.303935	0.0400227	0.00363002	0.980898	-0.130838	0.386109	0.208497	0.164372	-0.11866	0.432207	-0.0971363	0.520743	0.0547716	0.717705	0.273232	0.0661682
RAB11FIP5	0.261336	0.0793758	0.38266	0.00867437	-0.201842	0.178568	0.108621	0.472412	-0.201993	0.178237	0.260256	0.0806711	0.102111	0.499512	0.0508575	0.73713	0.0322268	0.831629	-0.101551	0.50188	0.188507	0.209619
SLC30A4	0.0257698	0.865012	0.382615	0.00868272	-0.136676	0.365079	-0.0912456	0.546451	-0.0677335	0.654686	0.109592	0.468439	0.160794	0.285742	-0.109821	0.467503	-0.00627459	0.966989	-0.00525063	0.972373	0.244666	0.101266
KIN	-0.0318354	0.833645	0.382216	0.00875863	-0.20425	0.173334	0.151712	0.314182	0.237137	0.112557	-0.0350323	0.817212	-0.0872636	0.564166	0.00936459	0.950748	0.0746554	0.621948	-0.148471	0.324752	0.0773101	0.609577
PRDM10	0.292357	0.0486551	0.38203	0.00879429	-0.219636	0.142478	-0.156122	0.300156	0.149745	0.320572	0.195964	0.19182	0.0238553	0.874958	0.0336241	0.824441	-0.20133	0.179696	0.0550183	0.716487	0.266852	0.0730154
LOC121108888	0.262207	0.0783437	0.379997	0.0091913	-0.0271041	0.858093	-0.104263	0.490467	-0.232851	0.119399	0.0192443	0.898987	0.813573	6.33299e-12	-0.453079	0.00156735	0.299022	0.0435182	0.42019	0.00364518	0.245363	0.100265
SIRT2	0.100644	0.505725	0.379702	0.00925022	-0.262364	0.0781586	0.202317	0.177527	-0.0922317	0.542106	0.152439	0.311843	0.366414	0.0122614	-0.320753	0.0297524	0.352193	0.0163761	-0.0326613	0.829393	-0.13308	0.377949
MFF	0.162193	0.281515	0.378748	0.00944283	0.25359	0.0890333	-0.202519	0.177085	-0.145956	0.333108	-0.0476	0.753421	0.377864	0.00962434	-0.329356	0.025411	-0.0708002	0.640097	0.161379	0.28397	0.286098	0.0539158
NOL8	0.157383	0.296221	0.378312	0.00953205	-0.148231	0.325545	-0.106777	0.480008	0.34348	0.0194348	-0.0752283	0.619269	0.0857623	0.570914	-0.155834	0.301059	0.0273856	0.856634	0.122479	0.41743	0.112066	0.458394
SGCE	-0.107829	0.475667	0.377972	0.009602	-0.0705903	0.641092	0.00812963	0.957237	-0.11478	0.447513	-0.148497	0.324667	0.376042	0.010008	-0.233189	0.118848	0.161781	0.282754	0.22644	0.130215	0.321706	0.0292432
STARD3	0.092818	0.53953	0.377077	0.00978846	0.0221826	0.883663	-0.155538	0.301989	0.1912	0.203063	0.0583583	0.700059	0.279275	0.0601628	-0.360166	0.013945	0.0808893	0.593067	0.085499	0.572101	0.00925016	0.951349
RNF144A	-0.0119508	0.937171	0.377009	0.00980279	-0.194529	0.195159	-0.114402	0.449021	-0.109307	0.469605	-0.0359086	0.812721	0.170293	0.257851	-0.0343478	0.820724	-0.0136603	0.928206	0.14782	0.326903	0.367714	0.0119339
ZNF143	0.0970327	0.52119	0.376065	0.0100031	0.0951075	0.529528	-0.101121	0.503699	-0.109159	0.470208	-0.0564644	0.709358	-0.038175	0.801132	0.230336	0.123558	-0.141117	0.349555	0.10088	0.504722	0.391228	0.00717725
FRMD4B	0.0855751	0.571758	0.375847	0.0100498	-0.029028	0.848134	-0.0218185	0.88556	-0.059393	0.694997	-0.00171721	0.990963	0.257506	0.0840426	-0.237099	0.112616	0.173401	0.249136	0.0902149	0.551011	0.188326	0.210065
RPL10A	-0.0697444	0.645105	0.375365	0.0101541	-0.465121	0.0011263	0.0698947	0.644391	0.0969947	0.521354	0.133024	0.378149	0.697012	7.40352e-08	-0.597609	1.15957e-05	0.459416	0.00131917	0.340636	0.0205323	0.129834	0.389794
ZFR2	-0.225743	0.131434	-0.375085	0.0102149	-0.0462105	0.760402	0.423981	0.00332108	-0.0339294	0.822872	0.0483378	0.749721	-0.314583	0.0332313	0.0732426	0.628574	-0.181524	0.227302	-0.0926237	0.540383	-0.256965	0.0847186
PHIP	0.316725	0.0319877	0.374772	0.0102832	0.255074	0.0871156	-0.229973	0.124167	-0.228204	0.127168	0.2171	0.147263	0.030052	0.842843	0.083146	0.58276	0.101067	0.503929	0.125383	0.406386	0.0895502	0.553961
LRRFIP1	0.427879	0.00301462	0.3742	0.0104093	-0.125231	0.40696	0.00013077	0.999312	-0.0176926	0.907095	-0.0808598	0.593202	0.0698727	0.644496	0.131724	0.382869	0.11743	0.437025	0.161184	0.284558	0.209325	0.162665
LOC100857331	0.104004	0.491552	0.373645	0.0105329	-0.13446	0.372977	-0.0490502	0.746154	0.0450455	0.766271	0.0783559	0.604733	0.204488	0.172821	-0.184729	0.219062	0.0605832	0.68919	0.0385927	0.799002	0.0391869	0.795972
MLPH	0.065608	0.664872	0.373471	0.0105719	-0.138222	0.359628	-0.0838312	0.579647	-0.0688069	0.649564	0.0448634	0.767189	0.16615	0.269783	-0.0169385	0.911038	0.0681618	0.65264	0.0710218	0.639048	0.22665	0.12985
RSBN1L	0.0495329	0.743741	0.373417	0.010584	-0.167722	0.265211	0.143167	0.342528	0.481356	0.00070753	0.0140781	0.926015	-0.0579266	0.702175	-0.213416	0.154421	0.00956672	0.949687	-0.234599	0.116571	0.100095	0.508062
PCMTD1	-0.0509206	0.736815	0.373358	0.0105972	-0.184429	0.219826	0.516397	0.000239	-0.025831	0.864695	0.0570649	0.706405	-0.173164	0.249793	-0.0822134	0.58701	-0.0169253	0.911107	-0.161914	0.282353	-0.130414	0.387663
COPS9	0.152092	0.312958	0.373228	0.0106265	-0.266427	0.0734904	0.11734	0.437381	-0.151882	0.313634	0.0531372	0.725796	0.636475	1.98965e-06	-0.453577	0.00154648	0.445351	0.00192563	0.269818	0.0697656	0.0571103	0.706182
ZNF330	0.0758003	0.6166	0.373161	0.0106416	-0.122455	0.417521	-0.104609	0.489021	-0.102837	0.496448	-0.0659055	0.663443	0.212917	0.15541	0.0106571	0.943961	-0.0288888	0.848854	0.145	0.336318	0.369416	0.0115164
RPS24	0.110604	0.464317	0.372637	0.0107605	-0.245258	0.100416	-0.0309598	0.838158	-0.0339571	0.82273	0.0846633	0.575877	0.620738	4.18033e-06	-0.431341	0.00276353	0.454367	0.00151382	0.333356	0.0235804	0.192179	0.200715
BEND5	0.105747	0.484278	0.372492	0.0107935	-0.108066	0.47469	0.0336145	0.82449	-0.23426	0.117115	-0.15798	0.294367	0.483656	0.000661183	-0.337995	0.0215974	0.238321	0.11072	0.468702	0.00101852	0.205384	0.170907
ZBBX	-0.269121	0.0705189	-0.372067	0.0108911	0.125061	0.407603	-0.0479422	0.751704	0.248673	0.0956221	0.132516	0.379992	-0.511034	0.000284357	0.175287	0.243946	-0.154078	0.306607	-0.313403	0.0339336	-0.382882	0.0086324
MPRIP	0.0347753	0.81853	-0.37191	0.0109274	0.247901	0.0966903	-0.208001	0.165401	0.143625	0.340969	0.276699	0.0626674	-0.395456	0.00652497	0.253321	0.0893844	-0.130027	0.389084	-0.275232	0.0641299	-0.0416239	0.78358
CMIP	0.206934	0.16763	0.371875	0.0109353	-0.180775	0.22926	0.18041	0.230216	0.0817758	0.589009	-0.120318	0.425754	-0.025966	0.863994	0.0699729	0.64402	-0.0974526	0.51938	0.0771226	0.610447	0.411774	0.00446539
GPAT2	-0.0642527	0.671399	0.371782	0.0109568	-0.0918712	0.543692	-0.0705443	0.64131	-0.0945583	0.531919	0.0101196	0.946783	0.141523	0.348156	0.044698	0.768024	-0.202944	0.176159	0.29004	0.0505517	0.323776	0.0281618
CCT2	0.209379	0.162556	0.371598	0.0109997	-0.068441	0.651309	0.120509	0.425013	-0.325677	0.0271984	-0.249294	0.0947692	0.358285	0.0144889	-0.033579	0.824673	0.0182854	0.903996	0.221826	0.138441	0.244957	0.100848
SMG6	0.0246474	0.870841	0.370646	0.0112225	-0.0657277	0.664297	-0.101472	0.502211	-0.0752106	0.619352	-0.00527463	0.972247	0.37061	0.011231	-0.363557	0.0130085	0.104951	0.487592	0.230181	0.123818	0.314505	0.0332774
KCNJ5	0.322923	0.0286036	0.37039	0.0112832	0.446943	0.0018464	0.289748	0.0507945	-0.244965	0.100835	-0.197421	0.188473	-0.245246	0.100432	0.282416	0.0572184	-0.199303	0.18421	-0.201333	0.17969	0.02523	0.867815
STARD13	0.272614	0.0668075	0.369957	0.0113863	-0.0585669	0.699037	0.345192	0.0187987	-0.0837137	0.58018	-0.0520375	0.731256	0.0874216	0.563458	-0.00987721	0.948056	-0.0480255	0.751286	-0.046522	0.758835	0.177898	0.236881
ELMOD1	0.0140333	0.92625	0.369061	0.0116025	-0.192499	0.199952	-0.0786197	0.603513	-0.0148706	0.921863	0.145926	0.333206	0.223424	0.13555	-0.140824	0.350565	0.202772	0.176533	-0.185055	0.218236	0.0292624	0.846922
CALML4	-0.175447	0.243507	0.368892	0.0116437	-0.175573	0.243164	0.0891946	0.555542	-0.0496551	0.74313	-0.0856169	0.571569	0.213001	0.155242	-0.227801	0.12786	0.11067	0.46405	0.0605437	0.689382	0.239532	0.108865
BZW1	-0.00348628	0.981655	0.36839	0.0117666	-0.300534	0.0424169	0.461675	0.00123955	-0.140349	0.352211	-0.282858	0.056814	0.186743	0.213993	-0.137456	0.362323	-0.034943	0.81767	0.233978	0.11757	-0.0431936	0.775626
RSPH3	0.0351182	0.816771	0.368333	0.0117807	-0.078446	0.604316	-0.106525	0.481049	-0.0900229	0.551862	-0.0962993	0.524358	0.0667561	0.659362	-0.0541178	0.720938	-0.0575587	0.70398	0.167856	0.264826	-0.105223	0.48646
FAM69B	-0.0732093	0.62873	-0.367727	0.0119306	0.0669205	0.658575	-0.111664	0.46002	-0.0646664	0.669404	0.0784931	0.604098	-0.022512	0.881948	0.171886	0.253358	0.169602	0.259814	0.328157	0.0259825	0.147758	0.327107
ZNF512B	0.171353	0.254856	0.367522	0.0119819	-0.180398	0.230249	0.0168297	0.911607	-0.159859	0.28859	-0.0369395	0.807445	0.0911964	0.546668	0.153532	0.308344	0.031948	0.833065	0.148236	0.325528	0.0849641	0.574516
FAM102A	-0.190436	0.204907	0.367156	0.0120735	-0.168351	0.263397	-0.181422	0.227569	-0.189922	0.206157	0.166931	0.267506	0.171871	0.2534	-0.118249	0.433813	-0.122878	0.415902	0.1846	0.219391	0.149196	0.322369
MPP1	0.17275	0.250943	0.366453	0.0122515	-0.192011	0.201116	-0.154962	0.303806	0.0469923	0.756472	0.0985134	0.514821	0.284802	0.0550605	-0.182311	0.22526	0.188589	0.209417	0.0231547	0.878602	0.0453457	0.764757
GOLGA3	-0.0161416	0.915208	0.366336	0.0122814	-0.185827	0.216289	0.0889071	0.556822	0.0424036	0.779626	-0.153984	0.306905	0.241637	0.105698	-0.295004	0.0465587	0.359413	0.0141608	0.083094	0.582997	0.219957	0.141881
MOB2	0.00731752	0.961505	0.365947	0.012381	-0.182464	0.224865	0.306311	0.0384159	-0.143434	0.341619	-0.170178	0.258176	0.0191617	0.899419	-0.0219864	0.884685	0.00473818	0.975069	-0.00613698	0.967712	0.0213	0.888262
ANKRD49	0.256699	0.0850532	0.36564	0.0124601	0.342065	0.0199745	-0.401023	0.00574498	-0.0159565	0.916177	-0.0877022	0.562202	0.282412	0.057222	-0.361312	0.0136224	0.0140122	0.926361	0.177964	0.236704	-0.078026	0.606259
ACOT11	0.0852859	0.573063	0.36536	0.0125325	-0.0324716	0.830369	-0.157244	0.296651	-0.119467	0.429059	-0.120738	0.424129	0.23174	0.121222	-0.0294698	0.845851	-0.00531249	0.972048	0.302134	0.0412765	0.37972	0.00924668
LOC121110493	0.0460513	0.761203	0.3652	0.0125744	-0.0293221	0.846614	-0.0184859	0.902948	0.0248281	0.869902	0.0302911	0.841609	0.0914202	0.54568	-0.116621	0.440213	0.0608937	0.687678	-0.0639783	0.672723	0.264946	0.0751664
SLC1A2	0.414434	0.00419029	0.364832	0.0126703	0.0189963	0.900283	0.060526	0.689468	0.00756818	0.960188	0.120172	0.426318	-0.255116	0.0870615	0.343725	0.0193427	-0.127893	0.396979	-0.144141	0.339217	-0.0542016	0.720523
DGCR2	0.42241	0.00345223	0.364665	0.0127143	0.101224	0.503264	-0.0727058	0.631099	-0.0235623	0.876482	-0.232451	0.120054	0.210668	0.159924	0.0293923	0.846251	-0.0816588	0.589544	0.315494	0.0326976	0.0815096	0.590226
TKFC	0.136729	0.364891	0.364458	0.0127688	-0.182798	0.224004	0.22132	0.139365	-0.14816	0.325779	-0.0486314	0.748251	0.0836369	0.580529	0.0770339	0.610859	0.0801638	0.596398	0.23159	0.121471	0.368355	0.0117751
OVCH1	0.1588	0.291838	0.363694	0.0129718	-0.077614	0.608167	-0.0323283	0.831106	-0.0600079	0.691994	0.0138842	0.927032	0.317471	0.0315632	-0.221916	0.138277	0.101446	0.502321	0.0471918	0.75547	0.177748	0.237282
SLC26A4	0.000410214	0.997841	0.362216	0.0133722	-0.0952656	0.528841	-0.0381677	0.80117	0.0442573	0.770249	0.0850367	0.574188	0.211088	0.159074	-0.225626	0.131639	0.0422776	0.780265	0.0362739	0.81085	0.0370257	0.807004
CCDC88A	-0.088947	0.556644	-0.362051	0.0134176	0.486827	0.000601777	0.2072	0.167072	0.153071	0.309815	-0.152517	0.311593	-0.540346	0.000106075	0.251427	0.091887	-0.275915	0.0634457	-0.258039	0.0833803	-0.146658	0.330762
GSPT2	-0.355995	0.0151754	-0.361763	0.0134969	-0.00579804	0.969495	0.373894	0.0104773	0.0989154	0.513098	-0.397538	0.00622306	-0.32315	0.0284853	0.168652	0.262534	-0.447325	0.00182781	0.00537309	0.971729	-0.141092	0.349641
HOOK3	-0.0710036	0.639134	-0.361736	0.0135045	0.0067166	0.964664	-0.223016	0.136283	0.217537	0.14643	0.116679	0.439985	-0.254062	0.0884197	0.283457	0.0562685	-0.338996	0.0211881	-0.174698	0.245558	0.000382109	0.997989
C4H4ORF50	-0.184498	0.219649	0.361673	0.0135219	-0.177352	0.238347	-0.0874022	0.563545	-0.0979223	0.517358	-0.057143	0.706021	0.0882268	0.559857	0.0927811	0.539692	-0.167562	0.265676	0.160942	0.285293	0.397888	0.00617363
LOC427025	0.382227	0.00875657	0.36143	0.0135894	-0.111952	0.458857	-0.0970579	0.521081	-0.103886	0.492044	-0.106145	0.482626	0.0792118	0.60078	0.101401	0.502514	-0.064034	0.672454	0.283349	0.0563669	0.148829	0.323576
SREK1	-0.00430031	0.977372	-0.360053	0.0139774	0.384056	0.00841336	-0.0883716	0.55921	0.0809029	0.593005	0.113089	0.454276	-0.584555	1.99311e-05	0.411301	0.00451594	-0.323446	0.0283319	-0.286377	0.0536718	-0.174978	0.24479
LOC101750715	0.0943013	0.53304	0.359966	0.014002	-0.106759	0.480084	-0.0852216	0.573353	-0.152787	0.310726	-0.0639978	0.672629	0.523005	0.000192162	-0.186468	0.21468	0.128255	0.395632	0.122099	0.418884	0.304815	0.0394211
ACOT7	0.131696	0.382972	0.359814	0.0140455	-0.249952	0.0938736	-0.19546	0.192988	0.0495663	0.743574	-0.00502795	0.973545	0.684629	1.5464e-07	-0.425928	0.00316477	0.272404	0.0670261	0.385489	0.00815267	0.217588	0.146332
GALNT7	0.24464	0.101302	-0.359367	0.0141738	0.242604	0.104267	-0.190117	0.205682	-0.0365955	0.809204	0.0884557	0.558835	-0.435212	0.00250475	0.490115	0.000545272	-0.269069	0.070575	-0.406484	0.0050599	-0.198719	0.185525
CREBRF	-0.152077	0.313006	-0.358902	0.0143085	-0.235793	0.11467	-0.123498	0.413533	0.239947	0.108236	0.349976	0.0171127	-0.435328	0.00249733	0.410867	0.00456275	0.00755624	0.960251	-0.0844501	0.576842	0.0902548	0.550834
SMARCE1	0.0258493	0.8646	0.358902	0.0143086	-0.146031	0.332855	0.0725418	0.631872	0.0536466	0.723271	-0.0969137	0.521703	0.370772	0.0111928	-0.320584	0.0298436	0.303285	0.0404715	0.226684	0.129789	0.169279	0.260739
GLUL	0.407252	0.00496952	0.35886	0.0143208	-0.112818	0.455367	-0.00142467	0.992503	0.0837401	0.580061	-0.00524472	0.972405	0.219677	0.142401	-0.226981	0.129274	0.178281	0.235854	0.122391	0.417766	-0.134066	0.374394
ATP11C	0.116208	0.441844	0.35877	0.0143472	-0.0538475	0.722276	-0.00182489	0.990397	-0.0679281	0.653756	-0.178815	0.234432	0.154901	0.303998	-0.0173761	0.90875	0.0892676	0.555217	0.136101	0.367119	0.39508	0.00658083
LRRN3	-0.112377	0.457139	-0.358716	0.0143629	0.278364	0.0610391	-0.180673	0.229528	-0.167658	0.265397	-0.217802	0.145927	-0.123459	0.413684	0.185947	0.215986	-0.180647	0.229594	0.0330892	0.827191	-0.177754	0.237266
PPP1R21	-0.0711594	0.638397	0.358093	0.0145454	-0.0210723	0.889449	-0.114388	0.449076	-0.138125	0.359967	-0.0993739	0.511138	0.291677	0.0492051	-0.219562	0.142617	0.0843467	0.57731	0.147018	0.329562	0.164416	0.274882
LOC121110413	0.321717	0.0292376	0.357806	0.0146303	0.314718	0.0331518	0.0725348	0.631905	-0.0985222	0.514783	-0.0713872	0.63732	-0.0751091	0.619826	-0.173324	0.249348	-0.219653	0.142447	0.0353596	0.815534	-0.401355	0.00570114
STEAP2	0.23079	0.122798	0.357455	0.0147348	-0.162084	0.281844	-0.0213086	0.888217	-0.158452	0.292909	0.228174	0.12722	0.239514	0.108893	-0.0484903	0.748957	0.158553	0.292597	0.0563872	0.709738	0.138286	0.359401
LOC416263	0.248103	0.0964095	0.357312	0.0147775	-0.175146	0.244331	-0.066597	0.660125	-0.139335	0.355734	0.0362057	0.811199	0.257345	0.0842438	-0.232816	0.119456	0.195142	0.193728	0.0940692	0.534053	0.0703301	0.642325
PXYLP1	0.197326	0.18869	0.357161	0.0148227	-0.0911396	0.546919	-0.118674	0.432149	0.0818371	0.588729	0.329403	0.0253891	-0.0540106	0.721468	-0.0771557	0.610293	0.0711582	0.638403	-0.220686	0.140533	0.12298	0.415511
OLAH	-0.21328	0.154689	-0.356607	0.0149893	-0.183172	0.22304	-0.23077	0.122832	0.185787	0.216389	-0.00223034	0.988263	0.119483	0.428996	-0.0988235	0.513492	0.0933554	0.537174	0.00345637	0.981812	-0.246608	0.0984989
NUP188	-0.10401	0.491525	-0.356604	0.0149902	-0.175872	0.24235	0.35251	0.016273	0.0249757	0.869135	-0.0334576	0.825297	-0.103415	0.494021	-0.0837465	0.580032	-0.0778217	0.607205	0.0760671	0.615356	-0.280138	0.0593426
FUNDC1	0.0603596	0.690279	0.355972	0.0151825	-0.341254	0.0202893	0.329516	0.0253357	-0.192664	0.199559	-0.044449	0.76928	0.262601	0.0778805	-0.124522	0.409642	0.336385	0.0222692	0.063919	0.67301	0.0639564	0.672829
CCDC157	0.026631	0.860545	0.355877	0.0152116	0.0317773	0.833944	0.0257655	0.865035	-0.0837701	0.579924	-0.0726684	0.631275	-0.0581691	0.700986	-0.00259135	0.986363	0.0534456	0.724267	0.0573897	0.704809	0.102002	0.499972
OXSM	-0.115012	0.44659	0.355174	0.0154282	-0.118833	0.43153	0.184797	0.218891	-0.0691861	0.647759	-0.132988	0.37828	0.119695	0.428173	-0.012991	0.931714	-0.159757	0.288902	0.101165	0.503515	0.164087	0.275858
RABGAP1L	0.166195	0.269652	0.354675	0.0155835	-0.390282	0.00733073	0.327998	0.0260592	-0.230198	0.123788	0.422231	0.00346738	0.259396	0.0817139	-0.291444	0.0493954	0.444512	0.00196858	0.0332822	0.826199	0.0678598	0.654082
ZMAT5	0.275645	0.0637159	0.354492	0.0156409	-0.0744514	0.622902	0.0188571	0.901009	-0.0260227	0.8637	-0.060894	0.687676	0.134703	0.372105	-0.110237	0.46581	-0.165773	0.270885	0.524248	0.000184346	0.131011	0.385475
JAKMIP1	-0.031858	0.833529	0.354475	0.0156462	-0.209343	0.162629	-0.0363536	0.810442	-0.226231	0.130578	-0.0117479	0.938235	0.381216	0.00895154	-0.0761716	0.614869	0.299455	0.0432009	0.0482503	0.750159	0.262408	0.0781073
CSNK2A2	-0.028479	0.850973	0.353155	0.0160651	-0.334802	0.0229468	0.347038	0.0181321	-0.132294	0.380796	-0.14747	0.328061	0.539227	0.000110328	-0.409019	0.00476698	0.231967	0.120848	0.125281	0.40677	0.244149	0.102012
FGFR2	0.333057	0.0237134	0.352968	0.0161253	-0.113939	0.450872	0.19739	0.188542	-0.176135	0.241635	0.00485135	0.974474	-0.126416	0.4025	0.184037	0.220825	0.0438458	0.772328	-0.0397807	0.792948	-0.046024	0.761341
HNMT	-0.113377	0.453119	0.352905	0.0161454	-0.109747	0.467807	-0.228924	0.125939	0.144575	0.337749	0.159403	0.289986	0.249756	0.0941396	-0.381708	0.0088561	-0.0485756	0.74853	0.383211	0.00857051	0.259299	0.081832
TMEM60	0.0811866	0.591705	0.352589	0.0162475	-0.243466	0.103004	0.223951	0.134606	-0.17995	0.231428	-0.0675778	0.65543	0.5875	1.76744e-05	-0.512684	0.000269629	0.0653496	0.666114	0.225787	0.131355	0.23365	0.1181
NSG1	0.0796433	0.598792	-0.352212	0.0163699	0.226625	0.129892	0.007567	0.960194	-0.0273853	0.856636	-0.184016	0.220879	-0.445565	0.00191479	0.619195	4.48622e-06	-0.328684	0.0257302	-0.217047	0.147362	-0.115595	0.444272
LUZP1	0.0123882	0.934876	-0.352087	0.0164107	0.263	0.0774133	-0.326617	0.0267319	0.116166	0.442011	0.343161	0.0195553	0.00957989	0.949617	0.0147409	0.922542	-0.0874556	0.563306	0.0308669	0.838637	0.2209	0.140137
LOC100858742	-0.109091	0.470486	0.351668	0.0165482	-0.0396396	0.793666	-0.295875	0.0458854	0.198647	0.185687	0.165642	0.271271	0.0539717	0.721661	-0.329316	0.0254302	-0.0185395	0.902668	0.225239	0.132319	0.166962	0.267414
PTPRD	-0.488044	0.000580274	-0.351349	0.0166535	-0.0313738	0.836023	0.170133	0.258306	0.0787837	0.602755	0.0642018	0.671645	-0.461528	0.0012446	0.30796	0.0373327	-0.0951591	0.529304	-0.301316	0.0418566	0.0874692	0.563245
STT3B	-0.0150763	0.920786	0.3503	0.0170036	-0.341851	0.0200571	0.354663	0.0155873	-0.272278	0.0671576	0.197444	0.188421	0.078083	0.605995	0.0127492	0.932982	0.408517	0.0048238	0.0587125	0.698324	0.0553365	0.714916
RORA	0.112738	0.455686	0.350144	0.017056	-0.238434	0.110547	0.244595	0.101368	-0.0559054	0.712111	-0.0651703	0.666977	0.177433	0.238127	-0.124872	0.408318	0.186287	0.215133	0.074971	0.620472	0.0297821	0.844237
P4HA2	0.242045	0.105092	0.349971	0.0171145	-0.0594454	0.694741	-0.114503	0.448616	-0.0439593	0.771754	0.0282814	0.851996	0.226463	0.130174	0.0494149	0.744331	-0.078203	0.605439	0.0395318	0.794215	0.064706	0.669213
LOC112531236	0.0391593	0.796113	-0.349835	0.0171607	-0.0646118	0.669667	0.0207446	0.891158	-0.107269	0.477976	-0.0464741	0.759077	-0.218832	0.143982	0.514012	0.00025829	-0.0197018	0.896599	-0.0835048	0.581129	0.117131	0.438201
PACRG	-0.0488313	0.74725	0.349759	0.0171865	-0.186503	0.214591	-0.0415578	0.783915	-0.0560573	0.711362	0.352083	0.0164122	0.340783	0.0204741	-0.272427	0.0670028	0.0269799	0.858736	0.147111	0.329253	0.248246	0.0962117
KCNC1	-0.0255457	0.866175	0.349751	0.0171891	-0.322628	0.0287575	-0.168163	0.263941	0.189643	0.206834	0.132905	0.37858	-0.00332561	0.9825	0.0409774	0.786862	0.260825	0.0799865	-0.0678298	0.654226	0.0899002	0.552407
TIMM9	-0.0141012	0.925894	0.349445	0.0172933	-0.255695	0.0863227	0.00264287	0.986092	-0.246934	0.0980407	0.233195	0.118838	0.351555	0.0165853	-0.2461	0.0992169	0.111195	0.461919	0.253763	0.0888076	0.140789	0.350687
P2RX5	0.28773	0.0525015	0.349435	0.0172968	0.155993	0.30056	-0.18998	0.206013	-0.252315	0.0907073	0.0705429	0.641316	0.420381	0.00362825	-0.432689	0.00267086	0.164559	0.274459	0.252472	0.0905	0.0312927	0.836442
BCL2L13	-0.0265568	0.86093	0.349397	0.0173097	-0.0577659	0.702963	0.144661	0.33746	-0.178953	0.234067	-0.145479	0.334706	0.0737817	0.626042	0.0247852	0.870125	0.186368	0.214931	0.0631353	0.676798	0.326743	0.0266699
TMED2	0.160791	0.285749	0.348234	0.0177111	-0.0716756	0.635957	0.0233393	0.877642	-0.0728944	0.630212	0.349574	0.0172495	0.0826009	0.585243	0.0146984	0.922765	0.0114917	0.93958	0.0690108	0.648594	0.387409	0.00781433
DAB2	0.369248	0.0115571	0.347081	0.0181169	0.0016306	0.991419	0.0874555	0.563306	-0.239735	0.108556	0.259868	0.0811406	-0.0948451	0.53067	0.0901118	0.551468	-0.148502	0.324651	-0.090113	0.551462	0.118401	0.433217
RNF24	0.085142	0.573712	0.346854	0.0181977	-0.045473	0.764116	-0.102072	0.499674	-0.0260362	0.86363	-0.0918124	0.543951	0.0934747	0.536652	0.00908899	0.952196	0.128715	0.393928	-0.0771502	0.610319	0.286761	0.0533375
KANK1	0.194888	0.194319	0.346348	0.0183789	-0.220752	0.14041	0.0897989	0.552856	-0.247324	0.0974945	-0.102081	0.499636	0.252834	0.0900225	-0.150947	0.316658	0.196136	0.191424	0.367095	0.012089	-0.11134	0.461329
FAM159A	-0.120406	0.425413	-0.346208	0.0184293	-0.126234	0.403183	-0.0265424	0.861004	0.00714899	0.962391	-0.071479	0.636886	-0.380956	0.00900214	0.475427	0.000840693	-0.17936	0.232985	-0.214556	0.152178	-0.0658435	0.663741
TUBGCP4	0.196123	0.191453	0.346148	0.0184509	-0.0462408	0.76025	-0.115797	0.443472	0.0605498	0.689353	0.135123	0.370603	0.240517	0.107375	-0.232976	0.119195	0.00718264	0.962214	0.345628	0.0186391	0.210844	0.159568
POU2F1	-0.207179	0.167117	-0.346107	0.0184657	0.131842	0.38244	0.32874	0.0257032	0.275932	0.0634286	-0.0227394	0.880764	-0.719724	1.73448e-08	0.453394	0.00155412	-0.420116	0.00365173	-0.189645	0.206831	-0.0287049	0.849805
NCAM2	-0.0450516	0.76624	-0.345982	0.0185108	0.0979934	0.517053	-0.0697015	0.645309	0.0565696	0.70884	0.144173	0.33911	-0.206837	0.167833	0.143793	0.340399	-0.183423	0.222396	0.138923	0.357172	0.0401232	0.791205
BCAP29	0.134576	0.372561	0.345925	0.0185315	-0.264829	0.0753	-0.0472842	0.755005	0.127892	0.396983	0.386125	0.00803927	0.248318	0.096112	-0.297494	0.0446547	0.0330103	0.827597	0.270555	0.0689761	-0.0819576	0.588178
UQCC3	0.302838	0.0407827	0.345769	0.018588	-0.00567792	0.970126	0.0178207	0.906425	-0.139906	0.353747	-0.103904	0.491967	0.374644	0.0103115	-0.418905	0.00376119	0.0164753	0.913462	0.256061	0.0858582	-0.104548	0.489274
OSBPL5	0.176984	0.239337	0.345558	0.0186647	0.266241	0.0736992	0.00956584	0.949691	-0.013101	0.931138	0.00297607	0.984339	-0.0899021	0.552398	-0.0340663	0.82217	0.0233617	0.877525	-0.223436	0.135527	0.217198	0.147074
LARP4	0.197048	0.189326	0.345048	0.0188515	0.0557263	0.712994	0.0734744	0.627485	-0.250089	0.0936868	0.0637896	0.673635	-0.126609	0.401776	0.217475	0.146548	-0.217945	0.145654	-0.0356922	0.813829	0.261903	0.0787026
TEDC1	-0.09574	0.526782	0.344672	0.0189901	-0.0117487	0.938231	-0.135305	0.369955	0.112911	0.454994	-0.0038946	0.979507	0.109854	0.467372	-0.0733595	0.628024	0.173515	0.24882	-0.101616	0.501603	0.220146	0.141531
WWC2	0.0893465	0.554867	0.344579	0.0190242	-0.160983	0.285168	0.0301255	0.842464	0.182175	0.225612	0.00397981	0.979058	-0.0120696	0.936548	-0.108333	0.473595	-0.00728675	0.961667	0.167864	0.264804	0.12123	0.422229
LOC101750283	0.112242	0.457685	0.344568	0.0190283	-0.0997786	0.50941	-0.0658112	0.663896	-0.0624095	0.680314	-0.0543264	0.719906	0.192271	0.200496	-0.203152	0.175707	-0.00771281	0.959428	0.402564	0.00554398	0.0502479	0.74017
PSEN2	0.0243011	0.87264	0.344344	0.0191117	-0.272139	0.0673037	0.0721975	0.633494	0.165589	0.271427	0.0822699	0.586752	0.21618	0.149026	-0.449136	0.001742	0.0580615	0.701513	-0.0987775	0.513689	0.158064	0.294107
LYN	0.099397	0.511039	0.344322	0.0191199	-0.0767704	0.612083	-0.0500458	0.741179	-0.0398836	0.792424	-0.032546	0.829986	-0.06146	0.684923	0.0153215	0.919501	-0.0204403	0.892745	-0.0158539	0.916714	0.219563	0.142614
CCDC30	-0.00284144	0.985048	0.344102	0.0192014	-0.0784994	0.604069	-0.042682	0.778216	-0.0427749	0.777745	0.0243361	0.872459	0.110895	0.463135	-0.174314	0.246614	0.00634633	0.966611	0.0996366	0.510016	0.375116	0.0102081
AQP4	-0.146683	0.330679	-0.343819	0.0193076	0.0764506	0.61357	-0.245904	0.0994955	-0.105365	0.485867	-0.0393119	0.795335	0.0873593	0.563737	-0.121585	0.420863	0.111789	0.459514	-0.0281175	0.852844	-0.120754	0.424068
STAG3	0.0395456	0.794145	0.343765	0.0193279	0.00258624	0.98639	-0.000218137	0.998852	0.142	0.346515	0.435666	0.0024759	-0.254991	0.0872217	0.0298172	0.844056	-0.149586	0.321092	-0.124239	0.410715	-0.00559387	0.970568
GABRA5	-0.00935397	0.950804	0.343612	0.0193852	-0.100081	0.508121	-0.212528	0.156184	0.0747701	0.621411	-0.232038	0.120732	0.167866	0.264797	-0.151795	0.313916	0.151761	0.314024	0.051157	0.735637	-0.182805	0.223984
GLI2	-0.160923	0.285349	0.343454	0.0194448	-0.0501346	0.740736	-0.0769443	0.611275	-0.0432223	0.775481	-0.0280989	0.85294	0.107789	0.47583	-0.139639	0.354675	0.0663787	0.661171	0.119142	0.430326	0.155599	0.301798
PEAK1	0.121814	0.419981	0.343216	0.0195347	-0.0305878	0.840077	-0.00934018	0.950877	0.161337	0.284095	-0.0280255	0.85332	-0.16386	0.276533	0.24985	0.0940119	-0.191501	0.202339	-0.227205	0.128887	0.392385	0.00699341
KRR1	0.118897	0.431279	-0.342696	0.0197324	0.608148	7.35749e-06	-0.263355	0.0769997	0.229384	0.125159	-0.27194	0.0675114	-0.068106	0.652907	-0.0406628	0.788461	-0.2233	0.135773	0.172894	0.250543	-0.209916	0.161455
NUP58	-0.0467669	0.757605	-0.342287	0.019889	0.359139	0.0142398	-0.15691	0.297691	0.0606069	0.689074	-0.143259	0.342213	0.140823	0.350567	-0.133343	0.376997	-0.00219138	0.988468	-0.00180993	0.990475	-0.00377272	0.980148
TRPM2	0.13635	0.366232	0.341965	0.020013	-0.293004	0.0481358	0.278186	0.0612116	-0.241129	0.106455	0.416468	0.00399001	0.15745	0.296012	-0.0225167	0.881923	0.328938	0.0256089	0.169274	0.260751	0.225585	0.131711
NUDC	-0.0950179	0.529918	-0.341629	0.0201431	0.524233	0.000184439	-0.0806844	0.594007	-0.343268	0.0195149	-0.247424	0.0973542	-0.0277305	0.854848	0.137947	0.360595	-0.175565	0.243185	0.0412384	0.785537	0.0684503	0.651264
NDUFS6	0.183492	0.222219	0.341517	0.0201868	0.096392	0.523957	-0.136058	0.36727	0.0952431	0.528939	-0.181623	0.227045	0.432572	0.00267877	-0.270371	0.0691727	0.303892	0.040052	0.0846765	0.575817	0.0780916	0.605955
SLC16A7	0.11387	0.451145	-0.341412	0.0202276	0.503063	0.000366223	-0.0728106	0.630606	-0.0357421	0.813573	-0.101679	0.501337	-0.376201	0.00997409	0.293368	0.0478457	-0.306538	0.0382652	-0.223474	0.13546	-0.133653	0.375879
HIF1A	0.265286	0.0747791	0.341047	0.0203702	0.470587	0.000965564	-0.281886	0.0577068	-0.15571	0.301449	-0.1007	0.505488	0.141151	0.349436	-0.0576539	0.703512	0.140727	0.350899	-0.00677806	0.964341	0.0498242	0.742285
TRDMT1	0.18327	0.222788	0.340569	0.0205585	-0.102954	0.495956	-0.120157	0.426378	-0.0259911	0.863864	0.329986	0.0251154	-0.142995	0.343112	0.219745	0.142276	-0.0887369	0.557581	0.103182	0.495001	0.353808	0.0158566
LOC121113113	0.108898	0.471278	0.340341	0.0206488	0.0214993	0.887223	-0.238401	0.110597	0.119032	0.430754	0.0416253	0.783573	-0.0496225	0.743293	0.14216	0.345966	-0.151041	0.316352	0.154576	0.305027	0.17647	0.240725
TTLL1	-0.330411	0.0249171	-0.339733	0.0208912	-0.117982	0.43486	-0.00441633	0.976762	0.141249	0.3491	-0.120836	0.423751	-0.0297566	0.844369	0.169808	0.259228	-0.119117	0.430423	0.130851	0.38606	0.0795124	0.599395
LRP2	-0.043699	0.773069	0.339674	0.0209148	-0.0593383	0.695264	-0.0217284	0.886029	-0.0156901	0.917572	0.0139817	0.926521	0.246571	0.0985512	-0.239962	0.108212	-0.0325704	0.82986	0.224233	0.134102	0.16836	0.263372
SYTL5	0.427577	0.00303739	0.339563	0.0209596	0.0807044	0.593915	-0.12323	0.414558	-0.0222764	0.883174	-0.0247278	0.870423	0.33221	0.0240932	-0.332964	0.0237549	0.0566478	0.708456	0.340909	0.0204246	0.152061	0.313058
TEX2	0.0865275	0.56747	-0.339414	0.0210192	-0.042129	0.781018	0.11483	0.447316	-0.289972	0.0506083	0.0674596	0.655995	-0.0110831	0.941725	0.404347	0.00531901	-0.0731871	0.628835	0.136403	0.366047	0.106101	0.48281
EXOC3	0.225694	0.131518	0.338565	0.0213635	-0.218096	0.145369	-0.088099	0.560428	-0.109729	0.46788	0.0802103	0.596184	0.154437	0.305467	0.200489	0.181559	0.191475	0.202402	-0.0482114	0.750354	0.253408	0.089271
SESN3	-0.269469	0.0701417	-0.338417	0.0214239	0.13884	0.357462	-0.0924793	0.541017	0.15515	0.303211	-0.197225	0.18892	-0.35714	0.014829	0.238338	0.110695	0.0212834	0.888349	-0.319764	0.0302889	-0.240548	0.107328
BIRC8	-0.230017	0.124092	-0.338345	0.0214534	-0.24191	0.105293	0.199457	0.183863	0.456983	0.00140998	-0.0349382	0.817695	-0.374459	0.0103521	0.213165	0.154917	-0.0216449	0.886464	-0.0279433	0.853746	-0.172327	0.252124
SSTR2	-0.165131	0.272772	-0.338335	0.0214577	-0.290868	0.0498671	0.343164	0.0195544	-0.143949	0.33987	-0.332262	0.02407	-0.0991058	0.512284	0.201375	0.179597	-0.0105123	0.944721	0.189277	0.207728	-0.202997	0.176042
RNFT1	0.0693229	0.647108	0.337992	0.0215985	-0.113491	0.452666	-0.093556	0.536296	0.459217	0.0013264	-0.190041	0.205865	0.0156553	0.917754	-0.0349552	0.817607	-0.0982203	0.516078	-0.0108794	0.942794	0.195778	0.192251
GAA2	0.333392	0.0235646	0.337661	0.021735	-0.155587	0.301835	0.205708	0.170219	-0.136287	0.366456	0.386864	0.00790912	0.0067499	0.964489	-0.108447	0.473126	0.0961352	0.525069	-0.185531	0.217035	-0.0979384	0.517289
UNC13B	-0.0190785	0.899853	-0.337399	0.021844	0.157288	0.296515	0.321172	0.0295277	-0.278914	0.0605091	-0.12852	0.39465	-0.435498	0.00248652	0.567158	3.95983e-05	0.0302042	0.842058	-0.0624383	0.680174	-0.0532792	0.725092
RAPGEF6	-0.088497	0.558651	0.337323	0.0218755	0.0374285	0.804945	0.243114	0.103519	-0.340401	0.0206252	0.437028	0.00239097	-0.0998555	0.509082	-0.0660523	0.662738	6.24951e-05	0.999671	-0.0524081	0.729414	-0.0805442	0.59465
HNRNPAB	0.172795	0.250818	-0.337199	0.0219271	0.190407	0.204978	-0.0928821	0.539248	-0.291913	0.0490134	0.11609	0.44231	-0.146844	0.330141	0.423709	0.00334351	-0.122296	0.418128	-0.107775	0.475889	-0.0344758	0.820067
MRPL57	0.155838	0.301046	0.337143	0.0219507	0.180332	0.230421	-0.402694	0.0055272	-0.091801	0.544001	0.102089	0.499603	0.508169	0.00031165	-0.373334	0.0106026	0.173148	0.249837	0.178733	0.23465	0.127675	0.397793
GRK5	0.130286	0.38813	0.336982	0.0220177	0.0588157	0.69782	-0.23942	0.109036	-0.00774147	0.959277	-0.147938	0.326513	0.201738	0.178796	-0.0967878	0.522247	-0.0636193	0.674458	-0.0233323	0.877678	0.265115	0.0749731
PHF21B	0.0889118	0.556801	0.336848	0.0220743	-0.305703	0.0388221	0.300571	0.0423904	-0.151758	0.314033	-0.0489125	0.746843	0.200345	0.18188	-0.156692	0.298372	0.202606	0.176895	0.0497264	0.742774	0.0653667	0.666033
TRAPPC8	-0.0595128	0.694411	0.336797	0.0220955	-0.211598	0.158045	-0.107942	0.475203	0.260605	0.0802505	-0.123324	0.414199	-0.0197641	0.896274	-0.0243823	0.872218	-0.175968	0.242088	0.319515	0.0304251	0.161505	0.283587
UGT2A1	-0.075307	0.618901	0.336527	0.0222089	-0.258964	0.0822423	-0.0640848	0.672209	-0.0466162	0.758362	-0.200631	0.181243	0.45991	0.00130138	-0.387931	0.00772446	0.36031	0.0139042	0.51869	0.000221688	0.38973	0.00742171
DYSF	0.202222	0.177734	0.336067	0.0224039	0.390535	0.00728941	-0.214311	0.152658	-0.237486	0.112013	0.104256	0.490497	0.316561	0.0320811	-0.30445	0.0396699	-0.0436479	0.773328	0.197811	0.187583	0.0175109	0.908045
KCND3	-0.283453	0.0562725	-0.336027	0.022421	0.0611811	0.686279	0.180831	0.229114	0.16503	0.273071	-0.0405962	0.7888	-0.375472	0.0101308	0.217882	0.145774	-0.1627	0.279994	-0.200022	0.182599	0.0892246	0.555409
MED8	0.202092	0.178019	0.336005	0.0224304	0.00260742	0.986279	-0.186974	0.213415	-0.0853174	0.57292	-0.022386	0.882604	0.336522	0.0222111	-0.0910607	0.547268	0.155637	0.301678	0.0960729	0.525339	0.157842	0.294796
CSGALNACT2	0.272306	0.0671285	0.335868	0.0224883	-0.209177	0.162969	-0.0779087	0.606802	0.51598	0.000242276	-0.0979068	0.517425	0.0758457	0.616388	-0.0839016	0.579328	0.0784029	0.604515	-0.0704863	0.641585	0.0041723	0.978046
PCF11	0.195967	0.191814	0.335623	0.022593	0.0471766	0.755546	-0.243409	0.103088	-0.0433	0.775088	0.206837	0.167835	0.190705	0.204257	-0.238258	0.110817	0.021426	0.887605	0.0355306	0.814657	0.0203079	0.893436
DPM2	-0.0430036	0.776587	0.335613	0.0225972	-0.234058	0.11744	-0.245948	0.0994328	0.233175	0.118871	-0.00773713	0.9593	0.405538	0.00517328	-0.350504	0.0169349	-0.134717	0.372054	0.268522	0.0711714	0.311236	0.035255
COL12A1	-0.0359783	0.812363	0.335599	0.0226036	-0.193022	0.19871	-0.176809	0.239809	-0.11946	0.429084	0.16804	0.264295	0.311192	0.0352821	-0.212834	0.155575	0.170216	0.258068	0.276762	0.0626044	0.079306	0.600346
PACSL	-0.0962691	0.524489	-0.335483	0.0226529	0.259585	0.0814841	0.199262	0.1843	-0.229192	0.125485	0.171946	0.253191	-0.146308	0.331928	0.074388	0.623199	-0.1882	0.210375	-0.0789283	0.602088	-0.115844	0.443285
NAV2	-0.259843	0.0811702	-0.335318	0.0227238	0.0265629	0.860898	0.221262	0.139472	0.116728	0.439793	-0.312004	0.0347822	-0.182257	0.225399	0.17096	0.255962	-0.192994	0.198777	-0.100638	0.505751	0.196086	0.19154
CAPN7	0.0424288	0.779499	0.33515	0.0227962	-0.248458	0.0959188	-0.0612801	0.685798	-0.0459714	0.761606	-0.0145803	0.923384	0.28097	0.0585595	-0.289404	0.0510828	0.223535	0.13535	0.21099	0.159272	-0.217612	0.146287
LOC121110749	-0.0356259	0.814169	0.334705	0.0229889	-0.180462	0.230079	-0.109942	0.46701	0.336857	0.0220702	0.0286787	0.849941	0.0846942	0.575737	-0.143689	0.340751	-0.244629	0.101318	0.0800573	0.596887	0.231605	0.121445
YRDC	0.0938261	0.535115	0.333745	0.0234088	0.0802025	0.59622	-0.00784816	0.958716	-0.079196	0.600853	0.075246	0.619186	0.303746	0.0401524	-0.455159	0.00148169	-0.00679512	0.964252	0.244015	0.102205	-0.164891	0.273481
ANKRD13B	-0.156506	0.298952	0.333706	0.023426	-0.0662768	0.66166	-0.0614701	0.684874	0.114324	0.449334	0.0166674	0.912457	0.149744	0.320575	-0.262545	0.0779461	0.0672982	0.656767	0.137098	0.363586	0.181141	0.228301
GDAP1	-0.17939	0.232908	0.333671	0.0234413	-0.0956809	0.527038	-0.133061	0.378017	0.238988	0.109696	-0.0778941	0.606869	0.329216	0.0254775	-0.401264	0.00571311	0.0298768	0.843748	0.252165	0.0909056	0.245926	0.0994641
GDE1	0.353964	0.0158072	0.333534	0.0235019	-0.116161	0.44203	-0.0754405	0.618278	-0.0813519	0.590948	-0.0563082	0.710127	0.280864	0.0586589	-0.097429	0.519481	-0.0318083	0.833784	0.474688	0.00085876	0.118624	0.432346
MAP7D1	-0.061903	0.682771	-0.333247	0.023629	0.0411259	0.786108	-0.102902	0.496176	-0.167921	0.264639	-0.0516428	0.733219	0.0651252	0.667194	-0.0369837	0.807218	0.299391	0.0432471	0.0615267	0.684599	-0.100803	0.505051
OSTC	0.11483	0.447312	0.333225	0.0236389	-0.0384166	0.799899	-0.027536	0.855855	-0.22933	0.125251	0.0166486	0.912555	0.584967	1.96004e-05	-0.44601	0.00189249	0.530098	0.000151291	0.354922	0.0155064	0.0489114	0.746849
SLC4A8	0.142965	0.343214	0.333147	0.0236732	0.123566	0.413276	-0.150637	0.317664	-0.154103	0.306525	-0.132298	0.380782	-0.0581119	0.701266	0.0557895	0.712682	-0.163431	0.277808	0.0366301	0.809027	-0.157031	0.297315
RAB10L	0.050423	0.739296	-0.333082	0.0237025	0.0568535	0.707444	0.00901761	0.952571	0.480378	0.000728092	-0.105837	0.483906	-0.132624	0.3796	-0.00397363	0.979091	-0.14678	0.330357	-0.123935	0.411869	-0.196581	0.190398
SS18L2	-0.0488671	0.747071	0.333032	0.0237246	-0.303982	0.0399899	-0.0981634	0.516323	0.176057	0.241846	0.272057	0.0673894	0.48048	0.000725937	-0.396276	0.00640456	0.185639	0.216761	0.184791	0.218905	0.367984	0.0118669
TYW1	-0.026376	0.861867	0.332935	0.023768	-0.264212	0.0760074	0.188797	0.208905	0.226757	0.129663	-0.0104266	0.945171	0.192587	0.199744	-0.125347	0.406524	0.0218061	0.885625	0.253978	0.0885283	0.219776	0.142217
SDHD	0.207748	0.165929	0.332825	0.023817	-0.00886049	0.953397	0.338049	0.021575	-0.0439408	0.771847	-0.204148	0.173553	-0.267102	0.0727372	0.294409	0.0470235	-0.106431	0.481439	-0.134669	0.372229	-0.135038	0.370906
SYT14	-0.0646838	0.66932	0.332593	0.0239212	0.0003981	0.997905	0.100926	0.50453	-0.224016	0.13449	0.0864378	0.567873	0.0958714	0.526212	-0.08789	0.561362	0.333667	0.0234432	0.11116	0.46206	-0.0590017	0.696909
PKLR	-0.0715529	0.636537	0.332298	0.0240537	-0.211042	0.159168	0.266523	0.0733828	-0.284936	0.054941	0.0768609	0.611662	0.294885	0.0466519	-0.243672	0.102704	0.346139	0.0184541	0.114219	0.449751	0.0831826	0.582594
SLC2A14	0.13699	0.363968	0.332029	0.0241752	-0.179628	0.232276	-0.14822	0.32558	-0.0405322	0.789125	0.0623274	0.680712	0.326628	0.0267264	-0.0595226	0.694363	0.32461	0.0277355	0.330716	0.0247759	0.510545	0.000288853
LOC107053888	0.0967172	0.522551	0.332011	0.0241832	-0.142718	0.344058	-0.144511	0.337968	-0.0243365	0.872456	-0.0553199	0.714998	0.235894	0.114509	-0.170692	0.256722	-0.0820032	0.58797	0.55909	5.37444e-05	0.2442	0.101938
BLCAP	0.32816	0.0259809	0.331959	0.0242068	-0.0134206	0.929462	0.030563	0.840206	-0.223611	0.135213	0.063329	0.675861	0.377866	0.0096239	-0.156145	0.300084	0.0632274	0.676353	0.176963	0.239392	0.234744	0.11634
TLN1	0.0644113	0.670634	0.331939	0.0242158	-0.111899	0.459071	0.178981	0.233992	-0.340034	0.0207711	0.139191	0.356238	0.172132	0.252669	-0.192453	0.200061	0.317472	0.0315631	-0.196121	0.191457	-0.193045	0.198656
UBXN2A	0.00768125	0.959593	0.331861	0.0242516	-0.21814	0.145286	-0.0869323	0.565652	-0.12999	0.38922	-0.195018	0.194018	0.242476	0.104456	-0.134914	0.371349	0.104442	0.489718	-0.0535192	0.723902	0.0606798	0.688719
SETD6	-0.0180179	0.905394	0.331847	0.0242577	-0.181901	0.226322	0.00905797	0.952359	-0.156289	0.299632	0.365648	0.012458	0.249702	0.0942128	-0.14555	0.334468	0.148767	0.323779	0.0636637	0.674243	0.230294	0.123627
LOC107054033	0.243226	0.103354	0.331313	0.0245012	0.286853	0.0532579	0.0336125	0.824501	-0.22569	0.131527	-0.0213418	0.888044	-0.100453	0.506539	0.232772	0.119528	-0.095063	0.529722	0.0348034	0.818386	0.139856	0.353921
SEMA6D	0.0360148	0.812177	0.331313	0.0245012	-0.0808437	0.593276	-0.366941	0.0121277	0.255658	0.0863702	0.0581058	0.701296	0.0771667	0.610242	-0.0332302	0.826466	0.202164	0.177862	0.00754984	0.960284	-0.0886026	0.55818
MYL6	0.0184792	0.902984	0.331147	0.0245772	-0.183453	0.222319	-0.092168	0.542386	0.172103	0.252749	-0.111419	0.461009	0.0624255	0.680236	-0.0901607	0.551251	-0.00557359	0.970675	0.0755754	0.617648	0.140022	0.353342
SNRPD1	0.0756616	0.617246	0.330593	0.0248328	-0.114001	0.450624	-0.184671	0.21921	0.601797	9.69693e-06	-0.102828	0.496488	0.223204	0.135945	-0.28607	0.0539406	-0.0912264	0.546536	0.0719648	0.634592	0.0940348	0.534203
ARL4A	-0.0617324	0.683599	-0.3302	0.0250153	0.11762	0.436279	-0.0794261	0.599793	-0.0703528	0.642218	-0.271877	0.0675775	-0.201329	0.179698	0.222586	0.13706	-0.320563	0.0298549	-0.0378512	0.802786	-0.318322	0.0310856
MACIR	0.296689	0.0452635	0.330086	0.0250685	0.154558	0.305084	-0.162909	0.279368	0.114821	0.447351	0.131099	0.38515	0.218647	0.144331	-0.344958	0.0188845	0.0705359	0.641349	-0.0230456	0.87917	-0.07997	0.597289
PLEKHA1	0.16239	0.280924	-0.32976	0.0252212	0.222188	0.137782	-0.00978506	0.94854	-0.210301	0.160669	-0.114637	0.448083	-0.135372	0.369714	0.152251	0.312446	0.200213	0.182174	-0.272086	0.0673583	-0.439727	0.00223018
FTH1	0.236987	0.112791	0.329687	0.0252555	-0.236663	0.113298	-0.136061	0.367261	-0.108414	0.473264	-0.0495913	0.743449	0.66516	4.59273e-07	-0.615192	5.37875e-06	0.3742	0.0104094	0.395741	0.0064829	-0.235639	0.114913
SHISA5	-0.15451	0.305237	-0.32964	0.0252774	-0.0621374	0.681634	-0.233477	0.11838	-0.151336	0.315398	0.0998502	0.509105	0.300883	0.0421659	-0.274175	0.0652006	0.34228	0.0198917	0.084229	0.577843	-0.17717	0.238835
VEZT	0.0581112	0.70127	0.329635	0.0252799	0.0335373	0.824887	0.181896	0.226335	0.308427	0.0370304	0.0555164	0.714029	-0.201589	0.179125	0.0788776	0.602322	-0.126474	0.402283	-0.215706	0.149941	0.0835546	0.580903
GTDC1	-0.0199149	0.895487	0.329382	0.0253991	-0.0732483	0.628547	0.102512	0.497821	-0.0955064	0.527795	-0.0609735	0.687289	0.238211	0.110889	-0.214381	0.152521	0.0191625	0.899414	0.112992	0.454668	0.300486	0.0424512
PPP1R9A	-0.0564589	0.709385	0.329176	0.0254961	0.0551022	0.716073	-0.249505	0.0944812	0.0327638	0.828865	0.139529	0.355057	0.0571596	0.70594	-0.105225	0.486449	-0.218135	0.145295	0.0286501	0.850088	0.16604	0.270103
RRAGA	0.0396742	0.79349	-0.329125	0.0255204	-0.334163	0.0232248	0.227373	0.128597	-0.197284	0.188786	0.252241	0.0908041	0.0452269	0.765356	0.0464799	0.759047	0.342853	0.0196725	-0.12485	0.408401	-0.411665	0.00447699
LOC112532411	-0.0655908	0.664955	0.329054	0.0255542	-0.0641581	0.671856	-0.0540864	0.721094	-0.0389929	0.796961	-0.038705	0.798429	0.0883719	0.559209	0.0143174	0.924762	-0.0503725	0.739548	0.218054	0.145449	0.0507204	0.737813
PNPLA8	-0.0254724	0.866556	0.328825	0.0256628	-0.452415	0.00159566	0.0458606	0.762164	0.086971	0.565478	0.275551	0.0638094	0.340648	0.0205275	-0.204408	0.172995	0.154455	0.305408	0.120712	0.424229	0.36159	0.0135449
TMEM42	0.0346701	0.81907	0.328734	0.0257063	-0.169253	0.260812	0.193763	0.196958	0.186695	0.214113	-0.223328	0.135722	-0.0987403	0.513848	0.0943212	0.532953	-0.315327	0.032795	-0.170109	0.258374	-0.00568058	0.970112
LOC771422	-0.0282647	0.852083	0.328697	0.025724	-0.185186	0.217905	0.0454178	0.764394	-0.114605	0.448212	-0.0778067	0.607274	0.321897	0.029142	-0.167146	0.266881	0.273284	0.0661139	0.0458171	0.762382	0.375251	0.0101787
ORC3	0.0727565	0.630861	0.32844	0.0258469	-0.15114	0.316032	-0.0781017	0.605908	-0.0395355	0.794196	-0.0629692	0.677602	0.242064	0.105064	-0.151122	0.316091	0.250118	0.0936477	0.272402	0.0670291	-0.10576	0.484224
RPS7	-0.0592067	0.695907	0.328397	0.0258673	-0.180699	0.229458	0.239536	0.10886	-0.0193125	0.898631	-0.0555784	0.713723	0.643119	1.43601e-06	-0.620363	4.2527e-06	0.427328	0.00305638	0.267639	0.0721421	0.0405642	0.788962
IGBP1	0.197747	0.18773	-0.328359	0.0258856	0.307848	0.0374056	-0.26033	0.0805814	-0.445458	0.00192022	0.416412	0.00399538	0.0838341	0.579634	0.0291527	0.847489	0.092653	0.540254	0.055383	0.714687	-0.255428	0.0866624
LRRC8D	-0.289368	0.0511129	-0.327563	0.0262696	-0.246889	0.0981043	-0.104771	0.488342	-0.0286662	0.850005	0.359083	0.014256	-0.293797	0.0475052	0.25325	0.0894768	0.155383	0.302478	-0.155391	0.302453	-0.219149	0.143389
WWTR1	-0.0506617	0.738106	0.327006	0.0265408	-0.315944	0.0324365	-0.0639238	0.672986	0.290201	0.0504182	-0.296993	0.045033	0.346305	0.0183945	-0.272961	0.0664485	0.22568	0.131543	0.0516002	0.733431	-0.0841083	0.57839
MCMDC2	0.16635	0.269197	0.326995	0.0265465	-0.0599607	0.692225	-0.00754394	0.960315	-0.0561098	0.711104	0.0706139	0.64098	0.143502	0.341385	-0.0213652	0.887922	0.0108966	0.942703	-0.0533874	0.724555	0.0243228	0.872527
TLCD4	-0.137228	0.363126	-0.326993	0.0265471	0.325402	0.027336	0.160745	0.28589	0.406179	0.00509621	-0.307426	0.037681	-0.139119	0.356487	-0.12005	0.426794	-0.110883	0.463184	-0.269974	0.0695973	-0.123644	0.412978
BRD2	0.0523998	0.729455	0.326881	0.0266023	-0.0466826	0.758028	0.240548	0.107328	0.393435	0.00683001	-0.0305885	0.840074	-0.314903	0.0330431	0.106607	0.480711	-0.118791	0.431695	-0.122764	0.416336	0.00377849	0.980117
BTBD3	0.254276	0.0881425	0.325818	0.0271279	-0.382478	0.00870872	-0.0394734	0.794513	-0.0871011	0.564895	0.296419	0.0454687	0.0596115	0.693929	0.198011	0.187129	-0.077023	0.610909	0.207592	0.166252	0.403688	0.00540124
FAM135A	-0.0309959	0.837972	0.325509	0.0272824	-0.13289	0.378636	-0.0633672	0.675676	-0.0774017	0.609152	-0.0848908	0.574848	0.116388	0.441132	0.038285	0.800571	0.0576627	0.703469	-0.0771551	0.610296	0.22605	0.130895
PRUNE2	0.276457	0.0629061	-0.325426	0.0273238	0.552707	6.80572e-05	-0.122187	0.418546	0.0446573	0.768229	0.0104497	0.94505	-0.376472	0.00991637	0.305921	0.0386764	-0.457736	0.0013813	-0.137966	0.360526	-0.143952	0.33986
FGFR1	-0.00536035	0.971796	0.325341	0.0273665	-0.222544	0.137136	0.295298	0.0463309	0.259055	0.0821303	-0.208096	0.165204	-0.0101232	0.946764	-0.100115	0.507977	-0.0788315	0.602535	-0.0621594	0.681527	-0.0955597	0.527564
RUNX1	0.023076	0.879012	0.325221	0.0274267	-0.0858134	0.570683	-0.0528125	0.727407	-0.0381967	0.801022	0.00166683	0.991228	0.253071	0.0897115	-0.203179	0.175649	0.15512	0.303305	0.171562	0.254268	0.24417	0.10198
BRPF1	0.176368	0.241001	0.323927	0.0280844	-0.0944471	0.532404	-0.0486428	0.748194	-0.123068	0.415173	-0.0599439	0.692307	0.44445	0.00197178	-0.225508	0.131845	0.143103	0.342743	0.0642572	0.671377	0.166965	0.267408
TAF2	-0.0842123	0.577919	-0.323716	0.0281928	0.362454	0.0133071	0.309469	0.0363633	-0.0689083	0.649082	-0.10543	0.485598	-0.278189	0.0612084	0.109794	0.467613	-0.179375	0.232946	-0.34243	0.0198341	-0.107963	0.475117
OSER1	0.267374	0.0724347	0.323544	0.0282815	-0.143053	0.342916	-0.0828136	0.584274	-0.176377	0.240978	-0.041592	0.783742	0.496632	0.000447149	-0.336712	0.022131	0.253666	0.0889344	0.523102	0.000191545	-0.0160242	0.915823
LETM1	0.0767627	0.612119	-0.323455	0.0283275	0.235595	0.114983	-0.0160177	0.915857	0.221015	0.139927	-0.204855	0.172035	-0.499987	0.000403121	0.447854	0.00180238	-0.306123	0.0385415	-0.159064	0.291026	-0.0574334	0.704595
SNAP29	0.130076	0.388902	-0.323191	0.0284638	0.32819	0.0259666	-0.07379	0.626003	-0.0677588	0.654565	-0.41183	0.00445946	0.0616768	0.68387	0.133589	0.376112	-0.071592	0.636352	0.0594913	0.694516	0.102754	0.496801
NT5C2	0.0125758	0.933892	0.32318	0.02847	-0.139197	0.356214	0.122709	0.416549	0.0784996	0.604068	0.111247	0.461706	0.248295	0.0961437	-0.282723	0.056937	0.133964	0.374759	0.146671	0.330717	0.151125	0.316079
DYRK2	0.0759079	0.616098	-0.323076	0.0285237	0.224187	0.134185	0.0373649	0.80527	-0.255346	0.0867677	-0.177881	0.236924	-0.0622508	0.681083	0.0065243	0.965676	0.0494267	0.744272	-0.172651	0.25122	-0.282114	0.0574962
DYNC2H1	-0.318795	0.0308223	-0.322959	0.0285845	-0.0448761	0.767125	-0.154995	0.303701	0.731393	7.78087e-09	-0.344827	0.0189325	-0.352372	0.0163179	0.195453	0.193004	-0.326934	0.0265764	-0.109305	0.469612	-0.107585	0.476671
BCOR	-0.00714232	0.962426	0.322878	0.0286266	-0.0857281	0.571068	0.153017	0.309991	-0.0530292	0.726331	-0.0520435	0.731226	0.184383	0.219943	-0.233931	0.117645	0.127313	0.399141	0.208133	0.165128	0.146224	0.332211
PDE3A	0.00299294	0.98425	0.322867	0.0286327	-0.265477	0.0745622	0.0681833	0.652538	0.292748	0.0483409	0.192588	0.199741	-0.00880436	0.953691	-0.0604469	0.689854	0.194692	0.194779	-0.102981	0.495843	0.270793	0.0687229
DDX59	-0.392388	0.00699299	-0.322576	0.0287848	0.0764211	0.613708	-0.000994032	0.994769	-0.00654956	0.965543	0.315697	0.0325796	-0.0925014	0.54092	0.0074382	0.960871	0.0524909	0.729003	-0.00543487	0.971404	0.0644205	0.670589
MAST4	-0.336524	0.0222105	-0.322395	0.0288795	-0.0353756	0.815452	-0.329397	0.0253916	0.105753	0.484252	-0.218078	0.145403	-0.164521	0.274572	0.24408	0.102111	0.000458722	0.997586	-0.195865	0.192049	0.0313313	0.836243
ETV3	-0.0571413	0.706029	-0.32208	0.0290454	0.07671	0.612364	0.0698951	0.644389	0.0127579	0.932937	-0.0495748	0.743531	-0.318633	0.0309124	0.116759	0.43967	-0.342592	0.0197721	-0.286278	0.053758	-0.373086	0.0106586
RPL27	0.0613499	0.685459	0.321547	0.0293279	-0.326553	0.0267636	-0.210476	0.160315	-0.0682601	0.652171	-0.076486	0.613406	0.639573	1.71068e-06	-0.112287	0.457502	0.271371	0.06811	0.429311	0.00290836	0.464965	0.00113123
ELP2	-0.000811125	0.995731	0.32128	0.0294698	0.0809044	0.592998	-0.199926	0.182814	0.0847156	0.57564	0.349789	0.0171761	0.156208	0.299884	-0.344372	0.0191012	0.0243322	0.872478	0.0756489	0.617306	0.153191	0.309431
SLC7A4	0.0847534	0.575469	0.321073	0.029581	-0.321964	0.0291066	0.156313	0.299557	0.0746346	0.622045	0.293338	0.0478694	0.0333763	0.825715	-0.116105	0.442252	0.0731091	0.629201	-0.127711	0.397659	-0.0740795	0.624645
RNF166	0.299364	0.0432671	0.321042	0.0295974	0.440216	0.00220213	-0.140835	0.350528	-0.190069	0.205797	0.0560141	0.711575	0.0273254	0.856946	-0.144763	0.337117	-0.0941639	0.533639	0.0833289	0.581929	-0.294434	0.0470044
TP53I11	-0.109674	0.468102	-0.320923	0.0296615	0.552209	6.9308e-05	0.00416289	0.978095	-0.145542	0.334496	-0.327459	0.0263197	-0.308027	0.0372896	0.0891602	0.555695	-0.0715454	0.636573	-0.0464885	0.759004	-0.511064	0.000284079
IP6K1	0.180109	0.231008	0.32077	0.0297435	-0.0695208	0.646168	-0.0494545	0.744133	-0.0612705	0.685844	0.0118201	0.937856	0.347344	0.0180237	-0.232944	0.119248	0.177988	0.236638	0.10018	0.507697	0.255674	0.0863491
TMEM214	0.213109	0.155029	0.320703	0.0297793	-0.107805	0.475766	-0.0952907	0.528732	-0.145344	0.33516	-0.0940546	0.534117	0.352636	0.0162322	-0.109092	0.470483	0.203706	0.174505	0.245392	0.100224	0.11696	0.438874
PCBD2	0.229285	0.125328	0.320543	0.029866	0.050227	0.740274	-0.0715204	0.636691	-0.252844	0.090009	-0.0824994	0.585705	0.475088	0.00084894	-0.173943	0.247635	0.0759629	0.615842	0.0928798	0.539259	-0.0563354	0.709993
INTS13	-0.0324618	0.83042	-0.320473	0.0299038	0.313169	0.0340744	0.432317	0.00269618	-0.177177	0.238818	-0.332825	0.0238172	-0.327615	0.026244	0.163759	0.276834	-0.234818	0.116221	-0.130603	0.386968	-0.250438	0.0932148
FAM234A	0.0164127	0.913789	0.320247	0.0300258	-0.088909	0.556814	-0.0706802	0.640666	0.0935845	0.536171	-0.287013	0.053119	0.21966	0.142434	-0.130764	0.386379	0.0317607	0.83403	-0.0157498	0.917259	0.11143	0.460967
TMBIM1	0.0990017	0.512729	-0.320198	0.0300528	-0.0165536	0.913052	0.323807	0.028146	0.251244	0.0921311	-0.0909072	0.547946	-0.0518229	0.732323	-0.173462	0.248965	-0.151696	0.314233	-0.0776954	0.60779	-0.325524	0.0272749
SULF2	0.105371	0.485844	0.319402	0.0304874	0.0064471	0.966081	-0.152565	0.311439	-0.199104	0.184656	-0.194521	0.195179	0.320411	0.0299371	-0.193855	0.196741	0.123847	0.412207	0.213101	0.155044	0.104453	0.489672
SERHL	0.0190919	0.899783	0.31935	0.0305157	-0.0438374	0.77237	-0.194883	0.194331	0.108469	0.473036	0.0232293	0.878214	-0.0652042	0.666814	-0.0584351	0.699683	0.021221	0.888674	-0.127168	0.399683	-0.0509567	0.736635
USP44	0.184921	0.218575	0.319196	0.0306004	-0.174958	0.244844	-0.143593	0.341078	-0.169885	0.259009	0.314642	0.0331969	0.011411	0.940003	0.0488122	0.747346	0.221779	0.138526	0.188722	0.20909	-0.0563049	0.710143
GAS7	0.00760913	0.959973	-0.318981	0.0307192	0.345015	0.0188633	-0.00833436	0.956161	-0.118858	0.431431	0.00969629	0.949006	-0.371858	0.0109392	0.330361	0.0249402	-0.245835	0.0995928	-0.142932	0.343328	0.0987159	0.513953
SBF1	-0.0420944	0.781194	0.318941	0.0307413	0.0141699	0.925534	-0.0372547	0.805833	-0.0215094	0.887171	-0.011912	0.937374	-0.00765138	0.95975	-0.0430148	0.776531	-0.103467	0.4938	0.0395296	0.794226	0.0519628	0.731627
OGDHL	0.118746	0.431869	0.318842	0.0307961	0.0925043	0.540907	-0.0291095	0.847713	-0.176783	0.239879	-0.15261	0.311293	0.140968	0.350068	0.155725	0.301401	0.12583	0.404701	-0.117942	0.435015	0.143829	0.340276
MANBAL	0.183254	0.222829	0.318503	0.0309843	-0.20737	0.166717	-0.118685	0.432108	0.0353436	0.815616	0.22534	0.132141	0.134772	0.371858	-0.100984	0.504282	0.261115	0.0796392	0.192815	0.199201	0.108034	0.474824
LOC101748122	0.287033	0.0531022	0.318248	0.0311269	0.0185281	0.902728	-0.291802	0.0491042	-0.133299	0.377155	-0.024174	0.873301	0.124213	0.410814	-0.10435	0.490102	0.0767753	0.61206	0.201759	0.178751	-0.0157405	0.917308
GLCE	-0.142049	0.346349	0.317991	0.0312704	-0.131392	0.384082	-0.0758425	0.616403	-0.0661043	0.662488	0.00735194	0.961324	0.271225	0.0682647	-0.0827222	0.58469	0.0620788	0.681918	-0.034099	0.822001	0.419378	0.00371813
ARID4B	-0.0652295	0.666692	-0.316717	0.031992	-0.163652	0.277151	0.000233641	0.99877	0.236819	0.113053	0.292429	0.0485965	-0.613203	5.88058e-06	0.476119	0.000824077	-0.302011	0.0413627	-0.261575	0.0790918	-0.17743	0.238136
NIPAL2	0.149308	0.322001	0.316655	0.0320278	-0.295308	0.0463229	-0.165287	0.272312	0.172926	0.250453	0.160083	0.287905	0.235198	0.115615	-0.266369	0.0735552	0.102757	0.496788	0.257249	0.0843638	0.217518	0.146466
ADAMTSL1	-0.16966	0.25965	-0.316464	0.0321372	-0.126823	0.400975	-0.195552	0.192775	0.383818	0.00845746	-0.0839263	0.579216	-0.0240181	0.874111	-0.0833819	0.581688	-0.218376	0.14484	0.183694	0.221701	0.0285563	0.850574
EBF3	0.398008	0.00615674	0.31638	0.0321852	-0.113866	0.451163	0.154397	0.305592	-0.186868	0.21368	0.263952	0.0763075	0.193403	0.197809	-0.146947	0.329798	0.0400742	0.791454	0.175544	0.243244	0.203788	0.174329
WDR70	0.0922868	0.541863	0.316294	0.0322349	-0.0628027	0.678408	-0.106934	0.47936	-0.33765	0.0217399	0.286086	0.0539265	0.124299	0.410488	0.0245664	0.871261	0.284163	0.0556322	-0.146756	0.330435	0.200427	0.181698
LOC426626	-0.135198	0.370336	0.316273	0.0322469	-0.097475	0.519283	-0.144025	0.339612	-0.125587	0.405619	-0.0929423	0.538984	0.223934	0.134636	-0.0121211	0.936277	0.045178	0.765603	0.167385	0.266188	0.367097	0.0120885
SLC29A4	0.0428207	0.777513	0.316261	0.0322535	-0.109878	0.46727	0.0507461	0.737685	-0.126526	0.402089	0.22283	0.136619	0.432463	0.00268619	-0.337192	0.0219302	0.334122	0.023243	0.185005	0.218363	0.164909	0.273425
NDUFS4	0.0525604	0.728658	-0.316143	0.0323217	0.0455094	0.763932	0.0651179	0.66723	-0.130255	0.388246	-0.289927	0.0506454	0.00364604	0.980814	0.165802	0.270802	-0.0169768	0.910838	0.172947	0.250397	-0.351632	0.0165602
BCAS3	0.0688841	0.649197	-0.316043	0.0323792	0.068238	0.652277	-0.0786863	0.603205	-0.140897	0.350315	0.0480861	0.750983	-0.345123	0.0188239	0.439892	0.0022207	0.155437	0.302306	-0.406896	0.00501124	-0.223474	0.135459
ARHGEF7	0.0869332	0.565648	-0.315779	0.032532	0.582969	2.12528e-05	-0.0165917	0.912853	0.241301	0.106199	-0.229645	0.124719	-0.369926	0.0113938	0.114328	0.449317	-0.1068	0.479911	-0.323156	0.0284823	-0.417386	0.00390237
RASGEF1C	-0.0984666	0.515021	-0.315742	0.0325535	0.00832036	0.956235	0.137757	0.36126	0.165613	0.271354	-0.254823	0.0874371	-0.190826	0.203964	0.315488	0.0327012	-0.00688319	0.963789	-0.0668726	0.658804	0.136345	0.366253
INSR	0.13703	0.363827	0.315656	0.0326035	0.0737663	0.626114	0.0877425	0.562022	-0.122235	0.418363	0.0835529	0.580911	-0.0293368	0.846538	0.0847749	0.575372	-0.0974826	0.51925	0.161782	0.282752	0.287913	0.052345
ARHGAP1	0.00625375	0.967098	0.315336	0.0327899	-0.128138	0.396068	0.000411784	0.997833	0.145562	0.334429	-0.0272775	0.857194	-0.269891	0.0696875	0.245533	0.100023	-0.119624	0.428449	-0.357418	0.0147458	-0.0237422	0.875546
GFOD1	0.13897	0.357009	0.315306	0.0328074	0.0957613	0.526689	-0.180946	0.22881	-0.170114	0.258358	0.340733	0.0204937	-0.087995	0.560892	0.122149	0.418695	-0.102057	0.499739	-0.0630793	0.677069	0.140401	0.352031
MAZ	0.169998	0.258689	0.315287	0.032818	0.0675998	0.655324	-0.02369	0.875818	-0.118458	0.432994	-0.0657638	0.664123	0.192194	0.200679	-0.218118	0.145327	0.0100926	0.946925	0.143734	0.340597	-0.290388	0.0502627
GTSF1	-0.142352	0.345309	0.315168	0.0328878	-0.25216	0.0909119	0.133153	0.377686	0.228442	0.126761	-0.111298	0.461499	0.0266349	0.860525	-0.107502	0.477015	0.0317544	0.834062	-0.0456375	0.763287	0.114074	0.45033
SLC25A3	0.176894	0.239581	0.314709	0.0331571	0.192247	0.200553	-0.188786	0.208933	-0.221787	0.138512	-0.327592	0.0262555	0.022237	0.88338	0.240692	0.107111	-0.162077	0.281864	0.254983	0.0872319	0.249822	0.0940495
NDUFAF1	0.0318011	0.833821	0.314461	0.0333038	-0.0799866	0.597212	-0.248083	0.0964371	-0.178986	0.233979	0.190388	0.205024	0.197404	0.18851	-0.282236	0.0573845	0.111157	0.462072	-0.160856	0.285554	-0.378095	0.00957657
KCNK10	0.174122	0.247143	0.314433	0.0333198	-0.146832	0.330182	-0.0828673	0.584029	-0.118961	0.431031	-0.000233675	0.99877	0.111685	0.459936	-0.0858037	0.570727	-0.07973	0.598393	0.262195	0.0783578	0.0617109	0.683704
NUMB	0.129671	0.390392	0.314212	0.0334508	-0.146914	0.329909	-0.13425	0.373733	-0.0908365	0.548259	-0.110421	0.465062	0.316817	0.0319352	-0.0812247	0.59153	0.104941	0.487634	0.375828	0.0100541	0.467065	0.00106659
LARP4B	-0.032425	0.830609	0.313573	0.0338317	-0.209339	0.162636	0.149183	0.322412	0.290674	0.0500266	-0.173715	0.248266	-0.0184239	0.903273	0.0905165	0.549675	-0.226349	0.130374	0.0782973	0.605003	0.362317	0.0133445
ST18	0.0301858	0.842152	0.313555	0.0338428	-0.263904	0.0763625	-0.203951	0.173978	0.420323	0.00363337	0.145832	0.333523	0.0687905	0.649642	-0.131674	0.383051	0.0659436	0.663259	0.0738821	0.625571	0.0785951	0.603627
SMARCD3	0.308638	0.0368949	0.313127	0.0340993	-0.00953375	0.94986	0.0839289	0.579204	-0.264984	0.0751228	0.34526	0.0187737	-0.0454354	0.764305	-0.0160368	0.915757	-0.0814046	0.590706	0.0466686	0.758099	-0.123687	0.412814
POP5	-0.244521	0.101474	-0.313109	0.0341103	0.112686	0.455896	0.0712824	0.637815	0.0109744	0.942295	-0.0169666	0.910891	0.185966	0.215938	-0.312027	0.0347678	0.30764	0.0375411	-0.137117	0.363519	-0.0605189	0.689503
SASH1	0.0301749	0.842209	0.312844	0.0342702	-0.195491	0.192916	0.211042	0.159167	-0.320291	0.0300022	0.16235	0.281044	0.111319	0.461416	0.0591475	0.696197	0.499416	0.000410319	-0.0730717	0.629377	0.192911	0.198973
ZC3H14	0.0865264	0.567475	0.312667	0.0343779	-0.116037	0.44252	-0.103531	0.493534	-0.0874889	0.563157	0.216809	0.147819	0.0192501	0.898957	-0.0618711	0.682926	0.189492	0.207203	0.20564	0.170362	0.178564	0.235101
NF1	0.145839	0.333499	0.312572	0.0344354	-0.295395	0.0462561	-0.0249238	0.869405	0.061734	0.683592	-0.0792962	0.600391	0.195346	0.193254	-0.197935	0.1873	-0.0286557	0.85006	0.105998	0.483234	-0.210111	0.161057
RERE	0.191242	0.202962	0.312441	0.0345152	0.202105	0.177991	-0.264737	0.0754051	-0.313337	0.0339735	0.333909	0.0233365	-0.111602	0.460272	0.146415	0.331572	-0.0817462	0.589144	-0.0910328	0.547391	0.0763058	0.614244
LSAMP	-0.106506	0.48113	-0.312424	0.0345252	0.117273	0.437644	-0.0792168	0.600757	-0.0451061	0.765965	0.0215187	0.887122	-0.214911	0.151485	0.368025	0.0118566	-0.18091	0.228907	-0.039871	0.792488	0.527453	0.000165502
LOC107050229	0.182033	0.225982	0.312364	0.0345621	-0.0817749	0.589013	0.0859618	0.570015	-0.0880909	0.560464	0.117796	0.435587	0.287426	0.0527627	-0.220926	0.140089	0.103695	0.492845	0.160588	0.286367	0.103958	0.491745
TERT	0.280641	0.058868	0.312033	0.0347641	-0.14905	0.322849	-0.0722663	0.63317	0.106302	0.481975	0.0146847	0.922837	0.375647	0.010093	-0.385702	0.0081145	-0.0608314	0.687981	0.294542	0.0469197	0.139977	0.353499
KLHL25	-0.415692	0.00406544	-0.311947	0.0348168	0.219714	0.142333	0.0304488	0.840795	0.0258524	0.864583	-0.00151487	0.992028	-0.0877097	0.562168	-0.0464159	0.759369	0.0865403	0.567412	-0.055778	0.712738	-0.141288	0.348966
LIMS1	-0.142697	0.344131	0.311894	0.0348493	-0.0844391	0.576891	-0.0189388	0.900583	-0.0804897	0.594901	0.0104259	0.945174	0.343852	0.0192949	-0.27947	0.0599771	0.105203	0.486543	0.11793	0.435062	0.262335	0.0781932
NOTCH2	0.0029583	0.984433	0.311679	0.0349815	-0.15458	0.305014	-0.228784	0.126177	0.223166	0.136014	-0.0783522	0.604749	0.401205	0.00572088	-0.118211	0.433962	0.140679	0.351067	0.277387	0.0619902	0.467	0.00106856
LSM8	-0.058184	0.700913	-0.311603	0.035028	-0.0278247	0.85436	0.0649761	0.667912	-0.0693439	0.647009	-0.068893	0.649155	-0.320302	0.0299964	0.548963	7.79928e-05	0.137211	0.363185	-0.197346	0.188644	-0.227852	0.127772
CHAMP1	-0.133517	0.376369	-0.311484	0.0351013	0.422126	0.00347639	0.302251	0.041194	-0.262451	0.0780562	0.077431	0.609016	-0.371628	0.0109925	0.233166	0.118885	-0.283737	0.0560152	-0.394751	0.00663003	-0.220037	0.141732
MFSD14A	-0.149875	0.320146	0.311437	0.0351306	-0.0618481	0.683038	0.442928	0.002052	-0.229766	0.124515	-0.183702	0.221679	0.173984	0.247523	-0.169679	0.259597	0.158388	0.293108	-0.124207	0.410838	-0.0359013	0.812758
CTPS1	0.293224	0.0479604	0.311118	0.0353283	0.362393	0.0133237	0.355607	0.0152945	-0.339944	0.0208068	-0.094221	0.53339	0.11409	0.450266	-0.220362	0.14113	-0.0161279	0.91528	-0.0772519	0.609847	-0.3794	0.00931075
ANKZF1	0.00618153	0.967478	-0.310999	0.0354021	0.3439	0.019277	0.282868	0.0568048	-0.211376	0.158494	0.274152	0.0652237	-0.220166	0.141493	-0.032158	0.831983	-0.0899533	0.552171	-0.193943	0.196534	-0.238775	0.110022
LRRC1	-0.0991289	0.512185	0.310968	0.0354211	-0.164976	0.27323	-0.0690045	0.648624	0.0756656	0.617228	0.104144	0.490965	-0.0696901	0.645363	-0.00034077	0.998207	0.0530668	0.726145	-0.0338409	0.823327	-0.178585	0.235045
FSD1L	-0.139421	0.355433	0.310742	0.0355623	-0.27688	0.0624882	-0.0294671	0.845865	0.0199133	0.895495	0.229864	0.12435	0.0453895	0.764537	-0.295275	0.0463484	-0.00595128	0.968689	0.290131	0.0504761	0.135651	0.368719
IFT20	0.304011	0.03997	0.310484	0.0357231	-0.181486	0.227403	-0.381148	0.00896464	-0.114659	0.447996	0.0166037	0.91279	0.418813	0.00376956	-0.111713	0.459821	0.0508284	0.737275	0.244441	0.10159	0.243637	0.102754
C3orf18	0.0290266	0.848142	0.31031	0.0358322	-0.165971	0.270305	0.155267	0.302844	-0.116042	0.4425	-0.0980473	0.516821	0.223113	0.136108	0.022026	0.884479	-0.133748	0.375537	0.249358	0.0946817	0.196437	0.190728
MIGA2	-0.103467	0.493802	0.310051	0.0359953	0.0327191	0.829095	0.267882	0.0718737	0.0296515	0.844912	-0.128382	0.395164	-0.0562575	0.710377	0.0457961	0.762488	-0.136916	0.364228	-0.174704	0.245541	0.286711	0.053381
ITPA	0.10804	0.474799	0.309924	0.0360756	-0.0824217	0.586059	-0.221185	0.139614	0.196796	0.189904	0.0537961	0.72253	0.444167	0.00198647	-0.449458	0.0017271	0.0871293	0.564768	0.233696	0.118025	-0.00117152	0.993835
CELF1	-0.0970948	0.520922	-0.309827	0.0361369	-0.0259645	0.864002	0.0638834	0.673182	-0.0255641	0.86608	0.208951	0.163436	-0.358752	0.0143524	0.347405	0.0180021	0.0574928	0.704303	-0.369734	0.0114397	0.0226087	0.881444
TSEN15	0.154646	0.304803	0.309647	0.0362509	-0.0976414	0.518567	0.156452	0.299121	-0.0655452	0.665174	-0.162218	0.281439	0.39442	0.00667983	-0.378971	0.00939743	0.0900064	0.551935	0.260054	0.0809146	0.249146	0.0949727
SYNE3	0.0351183	0.816771	0.309517	0.0363331	-0.194817	0.194486	-0.215043	0.151229	0.243733	0.102615	0.280243	0.0592426	0.286878	0.0532365	-0.264609	0.075552	0.171774	0.253671	0.291076	0.0496964	0.33027	0.0249829
LOC112533398	0.191692	0.201881	0.309388	0.0364153	-0.146505	0.331271	-0.087481	0.563192	-0.125158	0.407236	0.00847252	0.955435	0.398628	0.00606996	-0.34113	0.0203377	0.171341	0.254888	0.314102	0.0335165	0.105488	0.485356
AKR1E2	-0.116724	0.439806	0.309091	0.0366041	-0.074555	0.622418	-0.113192	0.453865	-0.0751514	0.619628	-0.0195148	0.897575	0.476519	0.00081459	-0.373936	0.010468	0.119054	0.430667	0.266383	0.0735397	0.445685	0.00190875
WDR11	0.0211319	0.889138	0.309022	0.0366482	-0.199697	0.183325	-0.129528	0.390923	-0.159571	0.28947	0.561213	4.96322e-05	0.0285722	0.850492	-0.000375233	0.998025	-0.0125286	0.93414	0.106178	0.48249	0.196048	0.191627
DDX5	0.0211398	0.889097	-0.308647	0.036889	0.270033	0.0695348	-0.143358	0.341876	-0.00994913	0.947678	-0.142743	0.343973	-0.324725	0.0276773	0.492718	0.000503967	-0.362704	0.0132388	-0.0768716	0.611613	0.244877	0.100962
RCBTB2	0.243511	0.102939	0.307985	0.0373165	0.0589789	0.697021	-0.152613	0.311283	0.184648	0.219268	0.057895	0.70233	0.198776	0.185396	-0.210123	0.161034	0.000823712	0.995665	0.108445	0.473135	0.122446	0.417553
AP3B2	-0.101825	0.500719	0.307949	0.0373397	0.0337892	0.823593	-0.175822	0.242486	-0.17439	0.246404	-0.101122	0.503696	0.297388	0.0447348	-0.192668	0.199551	0.0362872	0.810782	0.18795	0.210992	0.248335	0.0960883
PPCDC	0.0171445	0.909961	0.307903	0.0373697	-0.141238	0.349135	-0.112003	0.458651	-0.132114	0.381449	0.221149	0.139679	0.0495639	0.743586	-0.049627	0.74327	0.159163	0.290723	-0.0743242	0.623498	-0.155936	0.30074
SYNGAP1	-0.0498104	0.742354	-0.30787	0.0373912	0.330881	0.0246999	0.346214	0.0184271	0.0500849	0.740983	-0.378007	0.00959483	-0.331891	0.0242379	0.226743	0.129687	-0.237262	0.112362	-0.128642	0.394198	-0.209345	0.162624
GPRIN3	-0.158741	0.292017	0.307483	0.0376438	-0.134366	0.373314	-0.00749344	0.960581	0.392128	0.00703386	-0.161137	0.284702	-0.114401	0.449024	-0.0163024	0.914367	-0.201906	0.178428	-0.129283	0.391826	0.137454	0.362327
RPS15A	0.0662876	0.661609	0.30729	0.0377697	-0.0910854	0.547158	-0.150911	0.316776	-0.191986	0.201176	0.0260217	0.863705	0.608312	7.30458e-06	-0.396215	0.00641348	0.512923	0.000267556	0.207529	0.166385	0.105009	0.487351
PTK2B	0.134829	0.371656	0.307094	0.0378984	-0.149987	0.319781	-0.0760743	0.615322	0.369665	0.0114563	-0.0780106	0.60633	0.296961	0.0450572	-0.242593	0.104284	-0.193852	0.196748	0.113197	0.453842	0.161217	0.284458
LOC107054281	-0.00252618	0.986706	0.307044	0.0379314	-0.0704968	0.641535	-0.0378951	0.802562	-0.0729416	0.62999	-0.00483637	0.974552	0.407042	0.00499411	-0.200766	0.180945	0.184818	0.218837	0.190159	0.205579	0.149595	0.321063
EIF4B	0.0163089	0.914332	0.306961	0.0379859	-0.266036	0.0739305	-0.0930875	0.538348	-0.136474	0.365793	-0.263414	0.0769312	0.284417	0.0554043	-0.0565067	0.70915	-0.110673	0.464036	0.173495	0.248875	0.117126	0.43822
CSNK1G2	-0.0510437	0.736202	0.306925	0.0380101	-0.120623	0.424574	-0.0373088	0.805557	-0.0626217	0.679285	-0.0161996	0.914905	0.224821	0.133058	-0.158311	0.293344	0.17287	0.250609	0.25762	0.0839007	0.221652	0.138758
PTGFR	-0.0596054	0.693959	0.306696	0.0381611	-0.0971459	0.520701	-0.113983	0.450695	0.330149	0.025039	-0.102088	0.499609	-0.121049	0.422928	0.0528213	0.727363	-0.058624	0.698757	0.0915389	0.545157	0.102744	0.496841
ZNF346	-0.000708168	0.996273	0.306616	0.038214	-0.391226	0.00717761	0.15247	0.311744	-0.08229	0.586661	-0.125976	0.404152	0.466376	0.00108744	-0.189616	0.2069	0.302927	0.0407206	0.37428	0.0103915	0.248921	0.0952806
FAM169A	0.0498819	0.741997	0.306581	0.038237	-0.214837	0.151629	-0.0745643	0.622374	0.101694	0.501275	-0.209669	0.161961	-0.0108259	0.943074	0.0875077	0.563073	0.350232	0.0170263	-0.0202511	0.893732	-0.0173301	0.90899
TRAPPC11	0.0307165	0.839414	0.306361	0.0383831	-0.153908	0.307147	-0.046906	0.756905	0.059284	0.695529	-0.176568	0.24046	0.376886	0.0098287	-0.269963	0.0696093	0.062563	0.67957	0.313231	0.0340368	0.249987	0.093826
MAP4K3	0.276617	0.0627477	-0.306276	0.0384397	0.578946	2.49753e-05	-0.224046	0.134435	-0.166215	0.269591	0.197166	0.189055	-0.273839	0.0655441	0.236643	0.113329	-0.108936	0.471121	-0.0635743	0.674675	-0.168704	0.262384
RALA	-0.141543	0.348085	-0.306172	0.0385087	-0.0605582	0.689312	0.114074	0.450332	0.201659	0.17897	-0.142865	0.343556	-0.671071	3.32841e-07	0.617124	4.92922e-06	-0.32783	0.0261403	-0.258527	0.0827779	-0.318912	0.0307575
SLX4	0.0567405	0.708	0.306013	0.0386147	-0.105912	0.483594	-0.016507	0.913296	-0.0640662	0.672299	0.122453	0.417528	0.0260036	0.863799	0.00260044	0.986316	0.0148021	0.922222	-0.0159846	0.91603	0.102506	0.497844
C1QTNF4	0.0566692	0.70835	0.305787	0.038766	-0.153671	0.307902	0.28138	0.0581768	-0.398051	0.00615065	0.255783	0.0862107	0.276943	0.0624262	-0.202363	0.177427	0.308843	0.0367631	0.00227348	0.988036	0.179146	0.233552
DNAL1	-0.366413	0.0122617	-0.305713	0.0388151	0.0553844	0.71468	0.396647	0.00635075	-0.0848435	0.575062	-0.127629	0.397963	-0.233842	0.117789	-0.00343615	0.981918	-0.222179	0.137798	-0.27892	0.0605035	-0.28352	0.0562119
MTUS1	0.0585665	0.699039	0.30549	0.038965	-0.193319	0.198006	0.18733	0.21253	-0.126942	0.400531	0.0753583	0.618662	-0.0100328	0.947239	-0.00430425	0.977351	-0.0304676	0.840698	-0.104023	0.491469	0.00131648	0.993072
LOC101751181	-0.0392977	0.795408	0.305056	0.0392579	0.0189021	0.900774	-0.103463	0.493817	-0.251561	0.0917078	-0.0795237	0.599343	0.28673	0.0533645	-0.16879	0.262138	-0.0443739	0.76966	0.229776	0.124497	0.0225909	0.881537
PDPK1	0.140825	0.350561	0.304707	0.0394943	0.0460739	0.76109	-0.167812	0.264952	-0.323842	0.0281279	0.467178	0.00106323	0.190066	0.205806	-0.105659	0.484644	0.288988	0.0514323	0.165639	0.271279	0.185512	0.217083
PRMT5	0.0448647	0.767183	0.304465	0.0396593	-0.200498	0.181539	-0.0361137	0.81167	-0.110736	0.463782	0.0279176	0.853879	0.505919	0.000334724	-0.22386	0.134768	0.175913	0.242239	0.232634	0.119754	0.425436	0.00320366
CETN3	-0.059488	0.694532	-0.304259	0.0398004	0.337742	0.0217016	-0.308946	0.0366972	0.0164885	0.913393	-0.248563	0.0957739	0.0664589	0.660787	0.0206007	0.891908	-0.164934	0.273352	0.144012	0.339657	0.0196214	0.897019
SRSF5A	0.0145293	0.923651	0.303914	0.0400368	-0.334967	0.0228753	0.195921	0.19192	-0.0630214	0.67735	-0.114575	0.448329	0.139321	0.355783	-0.0694594	0.646459	-0.00178742	0.990594	0.194557	0.195093	-0.0647102	0.669193
OSBPL6	0.0147954	0.922257	-0.303883	0.0400582	0.177712	0.237377	0.154872	0.304089	-0.0392939	0.795427	0.255259	0.0868792	-0.211393	0.158459	-0.0388805	0.797534	-0.0773988	0.609165	-0.174488	0.246135	-0.191593	0.202117
LHFPL5	0.140583	0.351398	0.303864	0.0400711	-0.0332741	0.82624	0.117079	0.438407	-0.0868359	0.566085	-0.166418	0.269001	0.457945	0.00137343	-0.426406	0.00312739	0.366285	0.0122945	0.203227	0.175544	0.0471584	0.755637
TMEM183A	0.158397	0.29308	0.30374	0.0401567	0.364089	0.0128666	-0.0804809	0.594941	-0.241526	0.105863	-0.0422664	0.780321	0.32058	0.0298459	-0.375219	0.0101857	-0.0725887	0.631651	0.141037	0.349832	0.161579	0.283366
LOC101748714	0.00809423	0.957423	-0.30336	0.0404196	0.123313	0.41424	0.341384	0.0202387	-0.0971658	0.520616	-0.267022	0.0728254	-0.141059	0.349756	-0.00747297	0.960688	-0.068175	0.652577	-0.113157	0.454004	-0.357176	0.0148181
TAOK3	-0.235736	0.11476	-0.303075	0.0406175	-0.235434	0.115239	0.377098	0.0097842	0.450958	0.00165927	-0.233191	0.118844	-0.358665	0.0143776	0.258687	0.0825811	-0.187221	0.2128	-0.0667295	0.65949	0.136779	0.364714
ELMO2	0.147304	0.328612	0.302966	0.0406928	-0.0581687	0.700988	-0.245417	0.100188	-0.05564	0.713419	-0.12078	0.423965	0.196573	0.190416	-0.107769	0.475915	-0.0690774	0.648276	0.0427415	0.777914	0.151054	0.31631
PREB	-0.0401959	0.790835	0.302906	0.0407348	-0.0383896	0.800037	-0.0408657	0.78743	-0.157162	0.296908	-0.105477	0.485403	0.246926	0.0980518	-0.153243	0.309266	0.0590208	0.696816	0.144951	0.336484	-0.047788	0.752478
MAGI3	0.309031	0.0366429	0.302827	0.0407901	0.231132	0.12223	-0.153098	0.309729	-0.120427	0.425332	0.194468	0.195301	0.0954488	0.528045	-0.152362	0.312088	0.00165454	0.991293	-0.153081	0.309786	0.210652	0.159957
BBS5	0.040677	0.788389	0.302752	0.0408425	-0.102437	0.498136	-0.142092	0.346201	-0.150068	0.319515	0.406393	0.0050707	0.369663	0.0114568	-0.205864	0.169888	0.12689	0.400722	0.323886	0.0281051	0.299352	0.0432761
LOC100858814	-0.0192123	0.899154	0.302653	0.0409117	-0.0708172	0.640017	-0.00246069	0.987051	-0.0725662	0.631757	0.0783577	0.604724	0.503422	0.000362114	-0.570293	3.50913e-05	0.271544	0.0679281	0.205172	0.171358	0.24808	0.0964421
CHID1	-0.0578223	0.702686	-0.301878	0.041457	-0.0935098	0.536498	-0.0122794	0.935447	0.0216314	0.886535	-0.348724	0.0175411	-0.0812434	0.591445	0.142862	0.343567	-0.0313718	0.836034	-0.151342	0.315377	-0.333833	0.0233698
ZFPM1	0.0533929	0.724528	0.301809	0.0415062	-0.23514	0.115706	0.369935	0.0113916	-0.131963	0.381999	-0.128418	0.395029	-0.0193387	0.898494	0.0549348	0.716899	0.25533	0.0867878	-0.303925	0.0400293	0.209994	0.161297
MAD2L2	-0.199937	0.18279	-0.301654	0.041616	-0.0070258	0.963039	-0.120045	0.426811	-0.0833474	0.581845	-0.0810034	0.592544	-0.0122187	0.935765	0.00781575	0.958887	-0.19737	0.188588	0.0506754	0.738037	-0.221797	0.138494
HPCAL4	0.0298234	0.844024	0.301555	0.0416859	0.00259295	0.986355	0.113058	0.4544	0.0991361	0.512154	-0.166926	0.267519	0.303554	0.0402848	-0.44553	0.00191658	0.0386756	0.798578	0.278502	0.0609059	0.304268	0.0397941
SMN	-0.229378	0.12517	-0.301505	0.0417213	0.30425	0.0398061	-0.34967	0.0172167	0.0851794	0.573544	-0.198294	0.186485	0.0159363	0.916283	-0.043412	0.774521	-0.111798	0.459478	-0.241792	0.105467	-0.0692502	0.647454
ODF2	0.159785	0.288816	0.301448	0.0417622	-0.127249	0.39938	0.211098	0.159053	-0.119509	0.428897	-0.0813714	0.590859	-0.0252481	0.867721	0.0856954	0.571215	-0.000711408	0.996256	0.13554	0.369114	0.211488	0.158268
PTPRR	-0.220848	0.140234	-0.301383	0.0418081	-0.0275122	0.855979	0.472183	0.000922674	0.0593723	0.695098	-0.407844	0.00490082	-0.437268	0.00237627	0.335269	0.0227449	-0.124509	0.409691	-0.204333	0.173155	-0.3169	0.0318878
DEK	-0.23792	0.111339	-0.300827	0.042206	-0.253027	0.0897696	0.381081	0.00897783	-0.127574	0.398169	-0.0970429	0.521145	0.170744	0.256573	-0.0502562	0.740128	-0.00473362	0.975093	0.130498	0.387352	0.119413	0.429268
TNIK	-0.115336	0.445301	-0.300318	0.0425728	-0.322357	0.0288997	0.17876	0.234579	0.2015	0.17932	0.122278	0.4182	-0.0295028	0.84568	0.0840185	0.578798	0.0535237	0.72388	0.186882	0.213646	0.162562	0.280407
ARID5B	0.120024	0.426894	0.299962	0.0428305	-0.483113	0.000671883	0.0570878	0.706292	0.117038	0.438569	0.324404	0.0278403	0.0583297	0.700199	-0.0743511	0.623372	0.0978749	0.517562	0.12138	0.421651	0.189598	0.206946
AGPS	0.017346	0.908907	-0.299865	0.042901	0.430752	0.00280488	-0.199595	0.183554	0.166816	0.267839	-0.131537	0.383553	-0.437794	0.00234429	0.302086	0.0413103	-0.420426	0.00362422	-0.078285	0.60506	-0.33177	0.0242927
PYCRL	0.134569	0.372587	0.299851	0.0429113	-0.0656244	0.664793	-0.157737	0.29512	-0.210056	0.161169	0.136694	0.365015	0.537421	0.000117526	-0.4064	0.0050699	0.275308	0.0640533	0.226912	0.129394	0.202112	0.177975
SHROOM3	0.0129857	0.931742	0.299791	0.0429554	-0.0358257	0.813145	-0.0480598	0.751114	-0.035145	0.816634	0.00454139	0.976104	0.2812	0.0583448	-0.290791	0.04993	0.166041	0.270101	0.261787	0.0788401	0.167758	0.265108
GLRB	0.172037	0.252936	-0.299701	0.0430211	0.385947	0.00807097	-0.174747	0.245423	-0.210997	0.159257	0.100088	0.508093	-0.480434	0.0007269	0.574629	2.96286e-05	-0.173782	0.24808	-0.228053	0.127427	-0.242255	0.104782
MXRA7	0.00744319	0.960845	-0.299238	0.0433595	0.0472541	0.755157	-0.145385	0.335021	-0.0698344	0.644678	-0.141535	0.348115	0.0142067	0.925341	0.221169	0.139644	0.0794199	0.599821	-0.00544522	0.97135	-0.0328542	0.8284
TMEM138	0.0296196	0.845077	-0.298811	0.0436736	0.241555	0.10582	0.124053	0.411421	-0.261855	0.0787594	0.0275592	0.855735	0.198475	0.186077	-0.320782	0.0297371	0.131874	0.382326	0.155463	0.302227	-0.244243	0.101876
LOC112533366	0.121977	0.419355	0.298784	0.0436938	-0.0543208	0.719934	-0.0805264	0.594732	-0.0734744	0.627485	-0.156395	0.299301	0.282599	0.057051	-0.244549	0.101433	0.232572	0.119854	0.148231	0.325546	-0.0539536	0.721751
CACNA2D1	-0.0433157	0.775008	-0.298724	0.0437378	0.0749516	0.620562	-0.0892107	0.55547	-0.0198616	0.895765	0.332772	0.023841	-0.4001	0.00586832	0.356238	0.0151013	-0.101787	0.500879	-0.17241	0.251893	-0.080612	0.594339
NUP153	0.183071	0.223299	0.298703	0.043754	0.279372	0.0600701	-0.18788	0.211166	-0.225547	0.131778	0.419941	0.00366742	-0.0173992	0.908629	-0.197294	0.188762	-0.0304648	0.840712	-0.266982	0.0728702	-0.101367	0.50266
DEF6	0.109154	0.47023	0.298691	0.0437625	0.0624997	0.679877	-0.138116	0.36	-0.178136	0.236242	0.347227	0.0180651	0.235487	0.115155	-0.2532	0.089543	0.173204	0.24968	0.226609	0.129921	-0.0370477	0.806891
CSPP1	-0.422729	0.00342523	-0.298598	0.0438311	-0.212355	0.156529	0.0942634	0.533205	0.145138	0.335854	-0.192102	0.2009	0.0550755	0.716204	-0.058993	0.696952	0.0319285	0.833166	0.30951	0.0363377	0.142919	0.343371
MAN1B1	-0.0411541	0.785965	0.298249	0.0440904	-0.227988	0.127538	0.134484	0.372891	-0.177694	0.237428	0.0999878	0.508518	0.369259	0.0115545	-0.38786	0.0077366	0.190785	0.204064	0.482601	0.000682099	0.297488	0.0446595
CORO1C	0.196809	0.189875	0.297888	0.0443598	0.154464	0.305381	0.0755395	0.617816	0.0217076	0.886138	-0.0682541	0.6522	0.39014	0.00735408	-0.301657	0.0416133	0.172613	0.251325	0.206377	0.168803	0.313993	0.0335812
C20orf173	-0.021865	0.885318	-0.297795	0.0444291	0.103841	0.492232	-0.227865	0.127749	0.525504	0.000176739	-0.204038	0.173789	-0.135571	0.369006	0.230094	0.123964	-0.20323	0.175538	0.0191115	0.89968	0.276774	0.0625935
NKAIN2	-0.0509005	0.736915	0.297366	0.0447515	-0.337609	0.0217569	0.27176	0.0677005	-0.0292583	0.846944	0.22427	0.134036	0.0260274	0.863675	-0.106928	0.479385	0.0853962	0.572565	0.0419335	0.782009	-0.128112	0.396164
PFKP	0.144914	0.336606	0.297273	0.0448215	-0.0803848	0.595382	-0.168988	0.261571	-0.0407707	0.787912	0.160022	0.288091	0.630925	2.5974e-06	-0.433891	0.00259054	0.21424	0.152798	0.227944	0.127614	0.269056	0.0705898
XRCC3	-0.033752	0.823784	0.297041	0.0449965	-0.101772	0.500944	-0.0524635	0.729139	-0.0620497	0.682059	-0.0218612	0.885337	0.302819	0.0407958	-0.188802	0.208893	0.133493	0.376455	0.277343	0.0620331	0.256732	0.0850108
NDST2	-0.171144	0.255444	0.296802	0.0451774	-0.22078	0.140358	-0.0338641	0.823208	-0.0277707	0.85464	0.00132488	0.993028	0.436464	0.0024258	-0.234503	0.116726	0.197467	0.188367	0.27476	0.0646065	0.493573	0.000491029
GFRAL	-0.0907598	0.548598	-0.296775	0.0451984	-0.0836138	0.580634	0.42299	0.00340333	-0.216459	0.148489	-0.252503	0.090458	-0.0276178	0.855431	0.265864	0.0741236	0.0334707	0.82523	0.235256	0.115521	-0.0173292	0.908995
BTRC	0.104247	0.490531	0.296772	0.0452002	0.00714067	0.962435	-0.234936	0.116032	0.0195924	0.89717	-0.0342983	0.820978	0.155959	0.300665	-0.108651	0.472288	0.0197843	0.896168	0.0654676	0.665547	-0.181758	0.226695
NLK	-0.152043	0.313115	-0.296734	0.0452294	0.00428078	0.977475	0.141015	0.349904	0.21854	0.144531	-0.135183	0.370389	-0.570305	3.50749e-05	0.55823	5.54967e-05	-0.16459	0.27437	-0.260706	0.0801294	-0.0327637	0.828866
TENM2	0.336753	0.022114	0.296459	0.0454389	0.484941	0.000636509	-0.113355	0.453207	-0.141297	0.348932	-0.0441308	0.770887	-0.048079	0.751018	-0.0549729	0.716711	-0.162429	0.280804	0.108547	0.472717	0.255948	0.0860016
RPS14	0.0717002	0.635841	0.296181	0.0456512	-0.229413	0.12511	0.0257681	0.865021	-0.138636	0.358177	-0.0604683	0.68975	0.731636	7.64846e-09	-0.49639	0.000450487	0.498052	0.000428015	0.307934	0.0373495	0.142385	0.345197
C11orf58	0.0349218	0.817779	0.296113	0.0457033	-0.315702	0.0325765	-0.253184	0.0895638	0.0831157	0.582898	-0.0156361	0.917854	0.569473	3.62217e-05	-0.431867	0.002727	0.256895	0.084807	0.356581	0.0149971	0.15526	0.302866
SNX27	-0.0442777	0.770145	-0.2959	0.0458661	0.163947	0.276273	0.152751	0.310841	-0.251344	0.0919982	0.246493	0.098661	-0.116292	0.441512	0.0799243	0.597499	0.0107247	0.943606	-0.213081	0.155084	-0.0825524	0.585464
NEURL1B	0.0195947	0.897158	-0.295839	0.0459136	-0.212109	0.157021	0.136698	0.365001	-0.184898	0.218634	0.37949	0.00929266	-0.252222	0.0908295	0.246837	0.0981765	0.180749	0.229329	0.0381035	0.801498	-0.0820061	0.587956
IFFO2	0.112055	0.45844	0.295814	0.0459323	-0.21083	0.159597	-0.158399	0.293073	-0.236729	0.113195	0.574447	2.98415e-05	0.250509	0.0931193	-0.191414	0.202549	0.309331	0.0364511	0.0961128	0.525166	0.102531	0.497738
ZNF644	-0.166292	0.269366	-0.295806	0.0459385	0.468598	0.00102153	0.196065	0.191586	-0.100118	0.507964	-0.411636	0.00448012	-0.102955	0.495955	-0.00210595	0.988918	-0.350903	0.0168016	-0.246468	0.0986958	-0.333406	0.0235582
ERBIN	0.00631096	0.966797	0.295233	0.0463809	-0.0981773	0.516263	-0.21049	0.160286	-0.0723348	0.632847	-0.0785607	0.603786	0.0897125	0.55324	0.0654909	0.665435	-0.0325641	0.829893	0.0729059	0.630157	0.329307	0.0254345
GATD3A	0.129436	0.391263	-0.294899	0.0466411	0.214947	0.151416	0.12549	0.405982	-0.210233	0.160809	-0.0632427	0.676278	-0.0230569	0.879111	0.166811	0.267854	-0.227154	0.128974	0.0900482	0.55175	0.24825	0.0962063
EGF	-0.0331837	0.826705	-0.294884	0.0466521	0.301778	0.0415276	-0.177702	0.237406	-0.0845296	0.576482	0.191856	0.201487	-0.0446667	0.768182	-0.0408384	0.787569	-0.115429	0.444933	-0.00543921	0.971382	0.18418	0.220461
PTPN4	-0.0272114	0.857537	0.294826	0.0466973	-0.194138	0.196077	-0.0739254	0.625368	0.134895	0.371419	0.207509	0.166425	0.239021	0.109645	-0.381251	0.00894467	0.0943669	0.532753	0.0277987	0.854495	0.176979	0.239351
DYM	-0.113011	0.454592	0.294802	0.0467162	0.0478947	0.751942	0.0622794	0.680945	-0.173612	0.24855	0.10702	0.479003	0.155386	0.302466	-0.104667	0.488779	0.120746	0.424098	0.0604376	0.689899	0.101554	0.501864
COX7A2	0.207635	0.166164	0.294624	0.0468553	-0.218304	0.144977	-0.0767564	0.612148	-0.245183	0.100523	-0.0988679	0.513302	0.749985	1.98439e-09	-0.23982	0.108429	0.437443	0.0023656	0.344099	0.0192028	0.172177	0.252544
RNF103	0.243613	0.10279	0.294214	0.0471767	0.0903679	0.550333	-0.195875	0.192027	-0.0985997	0.514451	0.0180977	0.904978	0.16181	0.282668	0.0320518	0.83253	0.0447215	0.767905	0.211822	0.157595	0.329587	0.0253021
FAM120C	-0.142302	0.345481	-0.294115	0.0472543	0.147509	0.327931	-0.00520183	0.97263	-0.127079	0.400017	-0.161421	0.283841	-0.190163	0.20557	0.180087	0.231067	0.0274784	0.856153	-0.0799607	0.597331	-0.131151	0.384962
RTCA	-0.0827915	0.584374	0.29407	0.0472902	0.0599957	0.692054	-0.150487	0.318151	-0.191668	0.201937	-0.147651	0.327461	0.304251	0.039806	-0.253102	0.0896705	0.16618	0.269694	0.0722652	0.633175	0.118318	0.433544
KANK4	0.226075	0.130851	0.293828	0.0474806	0.0400242	0.791709	-0.0199744	0.895176	-0.0932319	0.537715	-0.0668887	0.658727	-0.0673278	0.656625	0.146321	0.331886	-0.0824487	0.585936	0.173347	0.249284	0.329971	0.0251224
SEC23A	0.0348948	0.817917	-0.293825	0.0474834	0.581187	2.28337e-05	0.0357689	0.813436	-0.155726	0.301398	0.000395166	0.99792	-0.168034	0.264311	0.114216	0.449762	-0.113154	0.454014	-0.185737	0.216516	-0.129305	0.391744
KDM4C	0.0240797	0.873791	0.293547	0.0477034	-0.292131	0.0488372	-0.0924608	0.541098	-0.135833	0.368072	0.270113	0.0694492	0.193773	0.196934	-0.281057	0.0584781	0.358253	0.0144985	0.0210093	0.889777	-0.0857945	0.570769
LOC101749287	-0.076575	0.612992	0.293437	0.0477905	-0.234715	0.116385	0.0870548	0.565102	-0.227674	0.128078	0.0956196	0.527304	0.488175	0.000578004	-0.30398	0.0399917	0.486722	0.00060366	0.00615779	0.967603	0.203506	0.174939
B3GNTL1	0.161508	0.28358	-0.293423	0.0478019	0.74163	3.71945e-09	-0.205671	0.170297	-0.161437	0.283794	-0.0390787	0.796524	-0.203895	0.174097	0.0956573	0.52714	-0.312881	0.0342484	-0.15418	0.306283	-0.0937321	0.535526
GTF3C1	-0.191045	0.203436	-0.29342	0.0478039	-0.0044973	0.976336	0.445442	0.00192101	0.327869	0.0261211	-0.0851466	0.573692	-0.427125	0.00307186	0.0644185	0.670599	-0.082995	0.583448	-0.217396	0.146697	-0.0373802	0.805192
LRR1	0.326852	0.0266163	0.293193	0.0479849	0.0363106	0.810662	-0.0504132	0.739345	-0.133973	0.374726	-0.10898	0.470939	-0.193495	0.197591	0.457629	0.00138535	-0.258397	0.0829386	-0.0829315	0.583737	0.189381	0.207474
TGFBRAP1	0.187794	0.211378	0.292811	0.0482901	0.0182742	0.904055	-0.244837	0.101019	0.318175	0.0311673	0.112241	0.457691	-0.0562422	0.710452	-0.0666263	0.659984	-0.149232	0.322251	-0.0872191	0.564366	-0.286078	0.0539336
CSF1R	-0.100566	0.506056	-0.292643	0.0484247	-0.177954	0.23673	-0.248019	0.0965266	0.172807	0.250784	-0.0835097	0.581107	0.0159953	0.915974	0.0476547	0.753146	-0.168163	0.263939	0.0483947	0.749436	-0.0652991	0.666358
ADCY8	-0.109379	0.469311	-0.292352	0.0486591	-0.0518426	0.732225	-0.0793927	0.599946	0.0465736	0.758576	0.221649	0.138764	0.209369	0.162575	-0.186287	0.215133	-0.052904	0.726952	0.0143558	0.92456	0.0216265	0.88656
NTPCR	-0.18145	0.227495	0.292184	0.0487943	-0.122853	0.415995	0.220889	0.140158	-0.0481172	0.750826	-0.0961253	0.525112	0.269559	0.0700443	-0.279349	0.0600919	0.185844	0.216245	0.278784	0.060634	0.161649	0.283154
NT5C3A	0.0363406	0.810509	-0.292116	0.0488492	0.116691	0.439937	-0.231323	0.121912	-0.0433454	0.774858	0.379394	0.00931202	-0.246689	0.0983849	0.15577	0.301259	-0.0432247	0.775468	-0.323524	0.0282915	-0.0185252	0.902743
SAMD11	-0.000265426	0.998603	0.291884	0.0490373	-0.149399	0.321702	-0.0501125	0.740846	-0.0987715	0.513715	0.214476	0.152334	0.293125	0.0480391	-0.129028	0.392767	0.153081	0.309783	0.0230494	0.87915	0.406785	0.00502439
SYT4	-0.336511	0.0222159	-0.291865	0.0490527	0.0774066	0.609129	0.461205	0.00125576	-0.120847	0.423706	-0.0217033	0.88616	-0.301671	0.0416036	0.120209	0.426177	-0.0505797	0.738515	-0.322896	0.0286176	-0.108415	0.473257
COMMD6	0.117157	0.438099	0.291724	0.0491673	-0.0357437	0.813565	-0.203506	0.174938	0.268448	0.0712525	-0.221846	0.138405	-0.0897209	0.553203	0.0935333	0.536395	-0.133882	0.375054	-0.147076	0.329371	0.202172	0.177845
SPIRE1	0.162104	0.281783	0.291712	0.0491772	0.131217	0.384721	-0.178246	0.235949	-0.165252	0.272417	-0.0190845	0.899822	0.110795	0.463542	0.0685907	0.650595	-0.0838696	0.579473	0.10983	0.467467	0.2727	0.0667187
RBBP8	0.0424095	0.779596	0.291702	0.0491854	0.00485348	0.974462	-0.0641243	0.672018	-0.0346647	0.819098	-0.0258077	0.864815	0.264063	0.0761787	-0.19781	0.187585	0.145561	0.334431	0.0478989	0.751921	0.264817	0.0753139
RSU1	0.213015	0.155214	0.291613	0.0492579	-0.369572	0.0114789	-0.0749602	0.620522	0.276643	0.0627228	0.548113	8.04244e-05	0.0994632	0.510756	-0.138693	0.357975	0.0409116	0.787197	0.0858142	0.57068	0.150937	0.31669
VSTM2A	0.0626907	0.678951	-0.291427	0.0494095	-0.0743385	0.623431	-0.00988874	0.947995	-0.0559946	0.711671	0.0362066	0.811195	-0.354818	0.015539	0.588073	1.7264e-05	-0.208986	0.163363	-0.184284	0.220196	0.0214154	0.887661
RTN1	0.184246	0.220292	-0.291192	0.0496014	0.132357	0.380566	-0.132257	0.380931	0.0615706	0.684386	0.213199	0.154849	-0.464847	0.00113499	0.531245	0.000145477	-0.0512742	0.735054	-0.329391	0.0253946	-0.520256	0.000210532
RAB7A	0.229057	0.125714	-0.291187	0.049605	0.281365	0.0581909	-0.123436	0.41377	-0.156381	0.299345	-0.0700081	0.643853	-0.4671	0.00106555	0.681822	1.81846e-07	-0.250142	0.0936153	-0.252745	0.0901399	-0.36242	0.0133163
ARL8B	-0.18032	0.230453	-0.291106	0.0496715	-0.0371809	0.80621	-0.126591	0.401845	-0.317259	0.0316836	-0.0943078	0.533011	-0.142541	0.344662	0.401844	0.00563704	-0.0667002	0.65963	-0.322478	0.0288357	-0.339624	0.0209348
SARNP	-0.29325	0.0479397	-0.291026	0.0497371	0.248305	0.0961302	0.217881	0.145776	0.115382	0.44512	-0.3638	0.0129434	-0.113737	0.451677	0.0531746	0.72561	-0.231768	0.121176	-0.104779	0.488308	0.437706	0.00234963
PPFIBP2	0.0364439	0.80998	0.290865	0.0498698	-0.204681	0.172409	-0.183783	0.221473	0.33878	0.021276	-0.120853	0.423683	0.1601	0.287855	-0.0983402	0.515564	0.152606	0.311305	0.148109	0.325948	0.237647	0.111762
ZNF800	0.162039	0.281978	0.290797	0.0499252	-0.0564467	0.709445	-0.0960296	0.525526	-0.11656	0.440456	0.31603	0.0323865	0.215159	0.151003	-0.149933	0.319957	0.240985	0.106671	-0.0419049	0.782154	0.042275	0.780278
SAR1B	0.0486283	0.748266	0.290577	0.0501071	-0.0629251	0.677816	0.070217	0.642862	0.0120903	0.936439	-0.29464	0.0468429	0.35183	0.016495	-0.193618	0.197301	-0.189182	0.207961	0.213741	0.15378	0.284128	0.0556635
KBTBD12	-0.106557	0.48092	0.290465	0.0501993	-0.191924	0.201324	0.271156	0.068338	-0.00684178	0.964006	-0.0457517	0.762712	0.209773	0.161748	-0.187174	0.212919	-0.0221878	0.883636	0.372275	0.0108432	0.169627	0.259743
RFFL	0.015312	0.919551	0.290188	0.050429	-0.0916893	0.544494	-0.0799926	0.597185	-0.0947609	0.531037	0.389272	0.00749777	0.0141076	0.925861	-0.0489837	0.746487	-0.00343319	0.981934	-0.0124209	0.934704	0.236756	0.113152
MORC4	0.176828	0.239758	-0.290186	0.0504304	0.374535	0.0103352	0.0699502	0.644128	-0.300761	0.0422533	-0.00493667	0.974025	-0.250581	0.0930218	0.152221	0.312543	-0.190437	0.204905	0.131205	0.384764	-0.213725	0.153811
SPATA20	-0.169236	0.260861	-0.290018	0.0505697	0.0528287	0.727326	0.00816025	0.957076	0.000976301	0.994862	0.253533	0.0891077	-0.176837	0.239732	0.0218637	0.885324	0.030152	0.842327	-0.29865	0.0437931	-0.194603	0.194985
TLR7	-0.135572	0.369001	0.289846	0.0507129	-0.217876	0.145786	0.636079	2.02826e-06	-0.125148	0.407274	-0.0959966	0.525669	0.197526	0.188233	-0.285457	0.054479	0.0929711	0.538858	0.187778	0.211418	0.0768649	0.611644
LOC121108542	0.0205494	0.892176	0.289712	0.0508251	-0.0167506	0.912022	-0.111386	0.461145	-0.145116	0.335926	-0.13769	0.361498	-0.0162714	0.914529	0.0999825	0.508541	0.258103	0.0833014	0.184641	0.219288	-0.0486315	0.74825
MLYCD	0.108533	0.472773	0.289678	0.0508537	-0.154337	0.305784	-0.0873868	0.563614	-0.0559442	0.71192	-0.00512009	0.97306	0.424202	0.00330304	-0.291401	0.0494304	0.214765	0.151769	0.185354	0.217481	0.240167	0.107902
DOCK11	0.0581621	0.70102	0.289607	0.0509125	-0.137408	0.36249	-0.0765524	0.613097	-0.0571702	0.705888	-0.0208591	0.890561	0.167181	0.26678	0.00298147	0.984311	0.083735	0.580084	-0.00257981	0.986424	0.455158	0.0014817
CNKSR2	-0.0545216	0.718941	0.289589	0.0509273	0.0174585	0.908319	-0.0772581	0.609818	0.289089	0.0513473	-0.148973	0.323102	-0.0110257	0.942026	-0.137116	0.363523	0.0661358	0.662337	-0.0518737	0.73207	0.0918029	0.543993
EFNB1	-0.134206	0.373888	0.289586	0.0509305	-0.109431	0.469098	-0.25261	0.0903175	0.190507	0.204736	0.00673123	0.964588	0.218598	0.144422	-0.292894	0.0482233	0.138463	0.358784	0.309741	0.0361911	0.0767059	0.612383
ATXN10	-0.0276005	0.855521	0.289392	0.0510927	-0.183595	0.221954	0.382171	0.00876737	-0.161058	0.28494	-0.144172	0.339112	0.0243157	0.872564	0.0607021	0.68861	0.00112187	0.994096	0.270535	0.0689977	0.27737	0.062007
CKAP5	-0.00620182	0.967371	0.289364	0.0511164	-0.209344	0.162626	0.204497	0.172803	0.362355	0.013334	-0.15203	0.313158	-0.292664	0.0484081	0.142357	0.345291	-0.138886	0.357301	-0.358229	0.0145054	0.127346	0.399018
CDKAL1	-0.00686727	0.963872	0.289293	0.0511758	-0.205126	0.171457	0.0689701	0.648788	-0.186637	0.214257	0.0403604	0.789998	0.132172	0.381242	0.0384683	0.799636	0.183755	0.221546	0.156223	0.299839	0.0111029	0.94162
LOC107053537	-0.105227	0.48644	0.289102	0.0513359	-0.159047	0.291076	0.0193462	0.898455	-0.0131403	0.930932	-0.0573051	0.705225	0.340116	0.0207382	-0.418601	0.0037891	0.166038	0.27011	0.187438	0.21226	0.145422	0.334897
EIF3B	-0.0153139	0.919541	-0.289095	0.0513424	0.56863	3.74201e-05	0.391373	0.007154	-0.197514	0.18826	-0.166138	0.269819	-0.342974	0.0196263	0.148397	0.324997	-0.175271	0.243989	-0.310315	0.0358294	-0.15193	0.31348
NDST3	0.209948	0.161389	-0.289049	0.0513813	0.758945	9.83877e-10	0.0802272	0.596106	-0.0845012	0.57661	0.0344358	0.820273	-0.361371	0.0136058	0.156713	0.298305	-0.351575	0.0165787	-0.298344	0.0440198	-0.201262	0.179845
ALDH1L2	0.200365	0.181834	-0.288778	0.0516093	0.488234	0.000576978	0.0768403	0.611758	-0.165906	0.270497	-0.000173391	0.999088	-0.0120941	0.936419	-0.046191	0.7605	-0.222481	0.137249	-0.106605	0.480719	-0.321823	0.0291814
PLPPR1	-0.109043	0.470683	0.288693	0.0516812	-0.316376	0.0321876	-0.248782	0.0954721	0.508452	0.000308847	-0.101022	0.504121	0.0669504	0.658431	-0.107374	0.477544	-0.111014	0.462651	-0.00689868	0.963707	0.215531	0.150281
EBF1	0.0345251	0.819814	0.28856	0.0517941	-0.172712	0.251049	-0.029268	0.846894	-0.141955	0.346669	0.101771	0.500948	0.474351	0.000867118	-0.291776	0.0491248	0.280091	0.0593866	0.146093	0.332648	0.342638	0.0197544
RELT	-0.0157379	0.917321	-0.288533	0.0518173	0.00649763	0.965816	0.0316382	0.834661	-0.0508863	0.736986	-0.0361219	0.811628	-0.191016	0.203507	0.503956	0.000356091	-0.113476	0.452723	-0.134333	0.373433	0.329061	0.0255507
LOC107054808	-0.0217421	0.885958	0.288533	0.0518173	-0.236951	0.112848	0.210341	0.160589	-0.190291	0.205259	0.0194435	0.897947	0.206553	0.168432	0.00991443	0.94786	0.280838	0.0586827	0.223139	0.136061	0.0991979	0.51189
YWHAE	0.0368204	0.808053	-0.288163	0.0521314	0.053423	0.724379	0.210319	0.160633	-0.211647	0.157947	-0.160014	0.288116	-0.153983	0.306908	0.394373	0.0066869	-0.377981	0.00960023	-0.0525846	0.728538	0.156991	0.297439
YBX1	-0.125761	0.404963	-0.288155	0.0521388	-0.160191	0.287575	-0.304835	0.0394078	-0.0599777	0.692142	-0.147949	0.326476	0.406009	0.00511652	-0.183586	0.221979	0.206621	0.168288	0.207314	0.166835	-0.137566	0.361934
ACACA	0.239877	0.108341	0.288019	0.0522543	0.170309	0.257806	-0.396836	0.00632349	0.0253358	0.867265	-0.213903	0.153461	0.406208	0.00509271	-0.204203	0.173436	0.170629	0.2569	0.198521	0.185973	0.259223	0.0819245
TPPP	-0.183492	0.222218	-0.28798	0.0522873	0.104144	0.490963	-0.391926	0.00706585	0.359338	0.0141823	-0.135441	0.369467	-0.356077	0.0151504	0.296592	0.0453373	-0.204981	0.171767	-0.164879	0.273514	-0.331212	0.0245476
TUFT1	0.0327481	0.828946	0.287891	0.0523639	-0.0720644	0.634122	-0.102648	0.497247	-0.0554894	0.714162	-0.0555216	0.714003	0.265959	0.0740172	-0.0552167	0.715507	0.105291	0.486174	0.193374	0.197877	0.226661	0.12983
PTBP3	-0.161165	0.284616	-0.28758	0.0526306	0.127189	0.399607	0.47395	0.000877167	0.118009	0.434755	-0.180388	0.230275	-0.285931	0.0540618	0.0633359	0.675828	-0.242225	0.104827	-0.0725145	0.632	-0.0106323	0.944091
JAK1	-0.0302794	0.841669	-0.287391	0.0527931	-0.102403	0.498277	0.00211143	0.988889	-0.136433	0.365939	0.0594083	0.694922	-0.210441	0.160385	0.275469	0.063892	0.178099	0.236341	-0.305263	0.0391182	-0.302751	0.0408431
TFG	0.188802	0.208893	-0.287365	0.0528156	0.482186	0.000690476	-0.146266	0.332071	0.0302372	0.841887	-0.143999	0.339699	-0.531228	0.000145562	0.620291	4.26686e-06	-0.343897	0.0192782	-0.331484	0.0244231	-0.297134	0.0449265
EIF2S1	0.0327836	0.828763	-0.28725	0.0529149	0.0980334	0.516881	-0.1226	0.416966	-0.0618451	0.683052	-0.170028	0.258604	0.161731	0.282906	-0.257849	0.0836163	0.0976255	0.518635	0.25883	0.082406	-0.341778	0.0200856
TFDP3	0.0492737	0.745036	0.287122	0.0530249	-0.147641	0.327494	-0.172866	0.250621	0.0478087	0.752373	0.00299414	0.984244	-0.0136112	0.928463	0.12782	0.397253	0.188816	0.208859	0.237407	0.112136	0.298983	0.0435469
HCRT	0.341936	0.0200244	0.286881	0.0532336	-0.245593	0.0999374	-0.0198753	0.895693	-0.0364773	0.809809	0.0875997	0.562661	0.556944	5.8215e-05	-0.471578	0.000938723	0.16134	0.284088	0.331754	0.0243001	-0.151787	0.31394
NAMPTP1	0.233716	0.117993	0.286681	0.0534073	-0.185875	0.216168	-0.175716	0.242773	0.219584	0.142575	0.0427857	0.777691	-0.0660776	0.662616	-0.0762161	0.614662	-0.0965281	0.523369	0.177844	0.237025	-0.17334	0.249304
SNCA	-0.265651	0.0743645	-0.286447	0.0536108	-0.0721585	0.633678	-0.0600297	0.691888	-0.162004	0.282082	-0.0480048	0.75139	0.00750855	0.960501	0.0663516	0.661301	0.0169472	0.910993	-0.149132	0.322579	-0.329368	0.0254056
CNDP1	-0.164002	0.276111	0.286432	0.0536238	-0.0882424	0.559787	0.0452425	0.765278	-0.0483328	0.749746	-0.048897	0.746921	0.241518	0.105876	-0.277826	0.0615618	0.0419018	0.78217	0.190149	0.205604	0.161823	0.282627
SYT7	-0.201177	0.180034	-0.286362	0.0536851	-0.190474	0.204815	-0.254552	0.0877861	0.292014	0.0489323	-0.0325376	0.830029	0.0229578	0.879627	0.0596129	0.693922	0.217658	0.146199	-0.0521156	0.730868	0.0210752	0.889434
SMCHD1	0.149443	0.321559	-0.286256	0.0537774	0.48031	0.000729558	-0.114735	0.447693	0.0483384	0.749718	0.0340407	0.822301	-0.389065	0.00753238	0.275169	0.0641929	-0.193837	0.196784	-0.156557	0.298794	-0.122129	0.418772
AGPAT2	0.0904878	0.549802	0.286029	0.053976	-0.221521	0.138998	-0.01594	0.916264	-0.159147	0.29077	0.0130295	0.931512	0.408352	0.00484253	-0.183481	0.222246	0.198678	0.185617	0.145729	0.333867	0.275387	0.0639743
HIVEP3	0.282529	0.057115	0.285873	0.0541134	0.0920571	0.542874	-0.122065	0.419017	0.144417	0.338285	-0.155205	0.303037	-0.0189675	0.900433	-0.0155506	0.918302	0.00603688	0.968239	0.0538169	0.722427	-0.0298462	0.843906
ZMYND12	0.11954	0.428773	0.285759	0.0542135	-0.148634	0.324217	0.0448231	0.767392	0.121014	0.423061	-0.147775	0.327052	-0.0213415	0.888046	0.0996018	0.510164	0.243325	0.10321	-0.134027	0.374533	0.0453816	0.764576
GATSL2	-0.0590109	0.696865	-0.285755	0.0542171	0.308765	0.0368132	-0.243524	0.102919	0.0657978	0.66396	-0.125007	0.407805	0.140912	0.350261	0.131239	0.384639	0.0380703	0.801667	0.0663511	0.661304	0.286522	0.053545
ARHGAP29	0.219632	0.142486	0.28572	0.0542477	0.29733	0.0447788	-0.242979	0.103717	-0.109052	0.470646	0.0638409	0.673387	0.231432	0.121731	-0.359361	0.0141757	-0.0065325	0.965632	0.148565	0.324442	-0.0105255	0.944651
PLA2G6	0.0203731	0.893095	-0.285331	0.0545906	0.0388675	0.7976	-0.241357	0.106115	0.121148	0.422545	-0.097476	0.519279	-0.280203	0.0592806	0.355788	0.015239	-0.0411291	0.786092	-0.212167	0.156905	-0.400706	0.00578704
GALNT9	0.128673	0.394082	0.285251	0.0546614	-0.0265848	0.860784	-0.0415084	0.784166	-0.228941	0.12591	-0.0142076	0.925337	0.289679	0.0508524	-0.147167	0.329069	0.0248549	0.869763	0.255709	0.0863055	0.058842	0.697691
MRPS18A	0.0237501	0.875505	0.285152	0.0547493	-0.245118	0.100616	-0.224832	0.133039	0.0906205	0.549214	0.129241	0.391983	0.468161	0.0010342	-0.478327	0.000772977	0.265245	0.0748251	0.189049	0.208287	-0.1454	0.334973
COQ7	-0.017622	0.907464	0.285072	0.0548204	-0.202313	0.177536	0.472666	0.000910037	-0.247448	0.0973205	-0.0487013	0.747901	0.198988	0.184918	-0.291638	0.0492374	0.146309	0.331925	-0.0237989	0.875251	-0.1353	0.369969
PRSS35	-0.0309413	0.838254	-0.284725	0.0551285	-0.146878	0.330029	-0.165391	0.272008	-0.204915	0.171907	0.548299	7.98863e-05	-0.0806411	0.594206	0.11873	0.43193	0.154391	0.305612	-0.235501	0.115131	-0.192838	0.199147
REEP3	0.0185431	0.90265	0.284691	0.0551591	0.0669672	0.658351	0.134265	0.373678	-0.107762	0.475944	-0.0441201	0.770941	0.107166	0.478401	-0.140101	0.353071	0.047701	0.752914	0.185692	0.216628	0.0466003	0.758442
RPL22	0.18695	0.213475	0.284621	0.0552218	0.0604822	0.689682	0.0435622	0.773761	-0.326926	0.0265802	0.026552	0.860955	0.709652	3.35753e-08	-0.539115	0.000110766	0.375633	0.010096	0.313144	0.0340892	0.0461355	0.76078
GRK2	0.0595056	0.694446	-0.284325	0.0554867	0.203033	0.175964	-0.302212	0.0412213	0.0962324	0.524648	0.0495744	0.743533	-0.266339	0.0735892	0.278904	0.0605181	-0.189393	0.207445	0.134796	0.371773	-0.0630858	0.677038
NFIL3	0.195442	0.19303	0.284174	0.0556221	0.209525	0.162256	-0.153488	0.308484	-0.212591	0.156059	0.217818	0.145896	0.122401	0.417729	0.0263847	0.861822	0.124314	0.41043	-0.00218884	0.988481	0.141166	0.349385
SRPK2	0.0960932	0.525251	0.284134	0.0556578	-0.0604757	0.689713	-0.0393967	0.794903	0.0255743	0.866027	0.0343893	0.820511	0.382701	0.00866645	-0.157128	0.297013	0.212901	0.155441	0.238484	0.110468	0.31526	0.0328338
AMPD3	-0.223554	0.135317	-0.283856	0.0559076	-0.055047	0.716345	-0.148677	0.324074	0.0278258	0.854354	0.174833	0.245188	-0.200899	0.180649	0.195412	0.1931	-0.0999439	0.508705	0.138034	0.360287	0.190982	0.203588
C19orf12	-0.147391	0.328323	0.283806	0.055953	-0.40152	0.00567943	-0.161971	0.282184	0.266455	0.0734588	-0.162033	0.281997	0.241954	0.105227	-0.251078	0.0923544	0.0501807	0.740505	0.127321	0.399112	-0.220107	0.141602
NUDT14	0.0388233	0.797826	0.283583	0.0561545	0.0879895	0.560917	-0.209546	0.162213	-0.142546	0.344645	-0.150634	0.317674	0.301592	0.0416596	-0.255197	0.0869584	-0.103252	0.494704	0.186919	0.213553	-0.0842875	0.577578
RPS12	0.129413	0.391345	0.283233	0.0564723	-0.189426	0.207364	-0.0791721	0.600963	0.0264986	0.861231	-0.0462575	0.760166	0.790839	6.19439e-11	-0.672894	3.00942e-07	0.307816	0.0374266	0.354236	0.0157214	-0.0160008	0.915945
ANKRD24	0.0404358	0.789615	0.28317	0.0565295	0.0670086	0.658153	-0.0308094	0.838934	0.017108	0.910152	0.0765906	0.612919	0.0430094	0.776558	-0.186468	0.214679	0.0308574	0.838687	-0.00224423	0.98819	0.0847688	0.575399
GSK3A	0.0578815	0.702396	-0.282854	0.0568172	0.185859	0.216208	-0.0752399	0.619215	0.18879	0.208923	0.0681781	0.652562	-0.40394	0.00536959	0.314813	0.033096	-0.100914	0.504577	-0.140975	0.350045	0.0478909	0.751961
FYCO1	-0.231124	0.122243	0.282843	0.0568278	-0.239211	0.109354	0.407557	0.00493405	0.0219882	0.884676	-0.209847	0.161596	-0.0589163	0.697327	0.0772633	0.609794	0.168194	0.263851	-0.0261459	0.863061	0.262023	0.0785615
LOC420480	0.00153415	0.991927	0.282727	0.0569334	0.163139	0.278681	-0.289167	0.0512814	0.173197	0.249702	-0.181403	0.227619	0.493902	0.000486132	-0.488855	0.000566325	0.151558	0.31468	0.313211	0.0340493	0.201454	0.179423
HPSE2	-0.0484034	0.749393	0.282645	0.0570086	-0.111674	0.459977	0.118388	0.433268	0.0847739	0.575376	-0.0793029	0.60036	0.132357	0.380569	-0.0351979	0.816362	-0.107466	0.477162	0.376964	0.00981226	0.209237	0.162846
NEFL	-0.0963785	0.524016	-0.282272	0.0573507	-0.00334255	0.982411	0.107242	0.478086	-0.0749492	0.620573	-0.125112	0.40741	0.0368378	0.807965	0.120686	0.424331	0.0249007	0.869525	0.00982166	0.948348	0.114435	0.44889
MEMO1	0.0408055	0.787736	0.281793	0.0577935	-0.1849	0.218629	0.0487288	0.747763	-0.184986	0.218411	0.0324515	0.830472	0.270227	0.0693265	-0.0712906	0.637777	0.337818	0.0216704	0.0591919	0.695979	0.0216843	0.886259
LOC101751623	-0.162639	0.280175	0.281765	0.0578195	-0.12989	0.389588	-0.179828	0.231749	0.370873	0.011169	0.0478397	0.752218	0.176747	0.239977	-0.396822	0.00632547	-0.022657	0.881193	0.315518	0.0326836	0.127224	0.399476
RBFOX3	0.158021	0.294242	0.281697	0.057882	-0.240658	0.107163	0.0744668	0.622831	0.0296326	0.845009	-0.0693473	0.646993	0.172903	0.250518	-0.00386409	0.979667	0.0839532	0.579094	0.178002	0.236602	0.329794	0.0252053
SSR2	-0.10792	0.475293	0.281593	0.0579789	-0.157274	0.296558	-0.12851	0.394687	0.187684	0.211652	-0.145988	0.333	0.542516	9.82476e-05	-0.674644	2.73009e-07	0.288596	0.0517638	0.512054	0.000275172	0.159163	0.29072
DOLK	0.2875	0.0526989	0.281583	0.0579883	0.0804155	0.595241	-0.125434	0.406193	-0.158114	0.293953	-0.338073	0.0215653	0.578533	2.53893e-05	-0.256649	0.085116	0.171591	0.254187	0.415722	0.00406244	0.211002	0.159249
PCDH10	-0.300737	0.0422711	-0.281552	0.0580171	0.0074888	0.960605	0.268054	0.0716839	0.0146304	0.923121	-0.148031	0.326206	-0.174119	0.247149	0.0723515	0.632768	0.0590355	0.696744	-0.202662	0.176774	0.117085	0.438385
LATS1	0.0552077	0.715552	-0.281524	0.0580428	-0.119572	0.428648	0.10386	0.492153	0.0737623	0.626133	-0.000653109	0.996563	-0.401119	0.00573222	0.361791	0.0134894	-0.141915	0.346808	0.0787456	0.602932	-0.0678537	0.654111
PPIP5K2	-0.0491425	0.745693	-0.281079	0.0584577	0.177537	0.23785	0.0812578	0.591379	0.0348182	0.81831	-0.376873	0.0098315	-0.302774	0.0408269	0.277429	0.0619494	-0.0875825	0.562738	-0.0674965	0.655818	-0.0304291	0.840897
DPP9	-0.0578274	0.702661	-0.280475	0.0590245	0.0629302	0.677791	-0.10335	0.494292	-0.107727	0.476086	-0.000414617	0.997818	0.0372448	0.805884	0.089791	0.552891	-0.254251	0.0881746	0.191101	0.203302	0.105833	0.483921
HTRA2	-0.0470747	0.756058	-0.280349	0.0591426	0.219867	0.142049	-0.248997	0.0951765	0.683587	1.64263e-07	-0.128316	0.395407	-0.18141	0.227599	0.0785174	0.603986	-0.281442	0.0581186	-0.11829	0.433653	0.0187763	0.901432
RSRP1	-0.154897	0.304012	-0.280206	0.0592775	-0.00342264	0.98199	0.355929	0.0151957	-0.134314	0.373502	0.0720577	0.634153	-0.109664	0.468146	-0.16272	0.279932	0.153566	0.308235	-0.0401472	0.791083	-0.3259	0.0270869
SS18	0.0992006	0.511878	0.280052	0.0594237	-0.245977	0.0993916	-0.329627	0.0252833	0.0962269	0.524672	0.122761	0.416347	0.150671	0.317554	-0.0724441	0.632332	0.0365587	0.809392	-0.177001	0.239291	-0.146956	0.329769
SFXN5	0.0105889	0.944319	0.279928	0.0595411	-0.065357	0.666079	0.463722	0.00117111	-0.21133	0.158585	0.124397	0.410118	0.191762	0.201713	-0.382342	0.00873459	0.210221	0.160833	-0.138166	0.359824	-0.0873669	0.563703
ERI3	-0.0643739	0.670814	-0.27991	0.0595585	0.0466816	0.758033	0.0743345	0.62345	-0.179586	0.232389	0.149702	0.320712	0.249798	0.0940817	-0.148256	0.325462	0.189224	0.20786	-0.0800253	0.597034	0.0392844	0.795475
PNPLA3	0.0846278	0.576037	0.279863	0.059603	-0.138112	0.360015	0.0715411	0.636593	-0.148649	0.324167	-0.0283053	0.851872	0.270305	0.0692432	-0.0357929	0.813313	0.0350149	0.817301	0.07978	0.598163	0.392141	0.00703186
DKK3	0.0630758	0.677086	-0.279834	0.0596302	0.0186961	0.901851	-0.097678	0.518409	-0.180823	0.229135	-0.01667	0.912443	-0.413481	0.00428707	0.748191	2.27562e-09	-0.0479498	0.751666	-0.157923	0.294544	-0.00301133	0.984154
THSD7B	-0.100552	0.506115	-0.279424	0.060021	0.110945	0.462932	0.143217	0.342355	0.38786	0.00773667	0.0535308	0.723845	-0.332946	0.023763	-0.0319366	0.833123	0.0171587	0.909886	-0.388566	0.00761636	-0.374967	0.0102405
ATP6V1H	-0.172829	0.250723	0.279285	0.0601531	-0.249371	0.0946639	-0.300756	0.0422569	0.019304	0.898675	0.00779385	0.959002	0.0994138	0.510967	-0.141862	0.346992	0.0903756	0.550299	-0.0551709	0.715733	-0.0755443	0.617794
POLE4	0.0265182	0.86113	0.279154	0.0602788	-0.117031	0.438596	-0.13867	0.358058	0.000110563	0.999418	0.067397	0.656294	0.523034	0.000191975	-0.588185	1.71846e-05	0.179118	0.233627	0.205055	0.171609	-0.0433352	0.774909
TMEM208	-0.304121	0.0398946	0.27908	0.0603494	-0.303632	0.0402314	0.113041	0.454468	0.506639	0.000327172	-0.279786	0.0596755	0.0494207	0.744301	-0.298514	0.0438939	-0.034996	0.817398	-0.0440685	0.771202	0.0244192	0.872026
CDKN1B	0.216777	0.147879	0.279069	0.0603603	-0.0581768	0.700948	-0.208106	0.165184	-0.230152	0.123866	0.368792	0.011668	0.0904962	0.549765	0.0436978	0.773076	0.097385	0.519671	-0.138302	0.359348	-0.110124	0.46627
PCSK2	0.149801	0.320388	-0.279005	0.0604211	0.0123252	0.935206	0.0548433	0.717351	-0.0433689	0.774739	-0.078632	0.603456	-0.457477	0.00139112	0.541241	0.000102781	-0.0989958	0.512754	-0.0745406	0.622485	-0.216885	0.147672
PPFIA4	0.207669	0.166093	0.278863	0.0605577	0.287138	0.0530111	-0.163374	0.277978	-0.128407	0.39507	-0.160941	0.285295	-0.0121935	0.935897	0.183407	0.222437	-0.156012	0.3005	0.0677736	0.654494	0.200075	0.182481
RNF144B	0.297613	0.0445652	0.278829	0.0605903	-0.101145	0.503598	-0.0705045	0.641498	-0.0894911	0.554223	-0.056495	0.709207	0.20091	0.180625	0.00354049	0.98137	-0.186711	0.214071	0.0432744	0.775217	0.346282	0.0184027
PPP1R16B	-0.0186791	0.901939	-0.278796	0.0606221	-0.313939	0.0336133	-0.0786663	0.603298	0.103034	0.495622	0.296649	0.0452937	-0.10068	0.505574	0.180013	0.231262	0.148451	0.32482	-0.0136392	0.928316	0.0970286	0.521207
SART3	0.254105	0.0883642	-0.278701	0.060714	0.119299	0.429713	0.109508	0.468782	0.0607239	0.688504	-0.252124	0.0909591	-0.179341	0.233035	0.232163	0.120526	0.0396943	0.793388	0.0601416	0.691342	-0.104184	0.490795
FAM207A	-0.131263	0.384551	0.27865	0.0607635	-0.214326	0.152629	-0.159456	0.289823	0.410198	0.00463582	-0.148665	0.324113	-0.0215531	0.886943	0.0203959	0.892977	-0.0505306	0.73876	-0.0717863	0.635435	0.266345	0.0735821
LOC112531854	0.214611	0.152071	0.278567	0.0608431	0.121514	0.421134	-0.109317	0.469563	0.164376	0.275003	-0.0242118	0.873104	0.101936	0.500249	-0.32538	0.0273469	-0.150241	0.318952	0.0769341	0.611323	0.129211	0.392093
LOC107056412	0.0168564	0.911468	0.278464	0.0609421	-0.191064	0.203389	-0.165042	0.273036	0.0813489	0.590961	-0.0919607	0.543298	0.253329	0.0893735	-0.129959	0.389332	0.444718	0.00195797	0.0910115	0.547485	0.163134	0.278696
GJC2	0.138723	0.357871	0.278453	0.0609529	-0.062552	0.679623	0.0936777	0.535764	0.0749113	0.620751	-0.112381	0.457123	-0.0384719	0.799618	0.166385	0.269097	-0.154438	0.305462	-0.112949	0.454837	0.0584599	0.699561
DLG1	-0.176938	0.239462	-0.278352	0.0610512	-0.218978	0.143708	0.151011	0.316451	0.240785	0.106972	-0.173548	0.248728	-0.400326	0.00583794	0.274073	0.0653051	-0.351626	0.016562	-0.286612	0.0534673	-0.408441	0.00483235
TPRA1	-0.0224095	0.882482	0.278198	0.0612003	-0.10831	0.473691	-0.139573	0.354904	-0.140787	0.350693	-0.175654	0.242943	0.238598	0.110293	0.0637965	0.673601	0.195355	0.193232	0.0243025	0.872633	0.277153	0.0622197
SCARF2	0.0467066	0.757907	0.278166	0.0612309	-0.0446984	0.768022	-0.0115058	0.939506	0.169636	0.25972	-0.175343	0.243791	0.192123	0.200849	-0.359946	0.0140078	0.108312	0.473682	-0.096878	0.521857	-0.0187142	0.901756
CDC37L1	0.0680709	0.653074	0.278152	0.0612449	-0.205631	0.170382	-0.1354	0.369613	0.0551792	0.715692	0.0106293	0.944106	0.498504	0.000422073	-0.403585	0.00541414	0.0266067	0.860671	0.374897	0.0102559	0.222936	0.136428
TMEM87B	0.0796878	0.598587	-0.278117	0.0612784	0.172309	0.252175	-0.142401	0.345143	-0.11528	0.445524	-0.101949	0.500195	0.0843526	0.577283	-0.0420323	0.781509	-0.0865955	0.567164	0.156789	0.298068	0.0301379	0.8424
LPGAT1	0.224326	0.133938	0.278111	0.0612839	0.0310929	0.837472	-0.226042	0.130908	-0.0622386	0.681143	0.280219	0.0592657	-0.0106041	0.944239	-0.0174308	0.908464	0.0712225	0.638099	0.0473439	0.754706	-0.200841	0.180776
PREPL	0.180469	0.230062	0.278018	0.0613745	-0.153308	0.309058	-0.252653	0.0902612	-0.140159	0.35287	0.318721	0.0308632	-0.0102749	0.945967	0.120907	0.423477	-0.0947877	0.53092	0.040608	0.78874	0.0761081	0.615165
OPHN1	-0.209056	0.16322	0.277914	0.061476	-0.22743	0.128498	0.337458	0.0218196	0.03945	0.794632	-0.136597	0.365359	0.330263	0.0249862	-0.36792	0.0118828	0.485842	0.000619693	0.0737989	0.625961	0.0957473	0.52675
LOC107052573	0.198661	0.185657	0.277813	0.0615744	0.0972901	0.52008	-0.0285616	0.850546	-0.0682295	0.652317	0.425921	0.00316532	-0.104829	0.4881	0.0662409	0.661833	-0.183322	0.222654	-0.121124	0.422637	0.232607	0.119797
TAF12	-0.0770739	0.610673	0.277705	0.0616792	-0.301029	0.0420615	0.341119	0.020342	0.039103	0.7964	0.229753	0.124537	0.260337	0.0805731	-0.556259	5.97124e-05	0.275998	0.0633632	0.0151229	0.920542	-0.236242	0.113959
LOC112530775	-0.05908	0.696527	0.277492	0.0618876	0.0831429	0.582775	-0.111163	0.462048	0.122114	0.418826	-0.0605166	0.689514	0.128856	0.393405	-0.330422	0.0249122	-0.0265598	0.860914	0.349894	0.0171407	0.346504	0.0183227
ARMC3	-0.11571	0.443818	0.277491	0.0618884	-0.0546004	0.718551	-0.0653626	0.666052	0.0446353	0.76834	-0.0387368	0.798267	0.226837	0.129524	-0.311233	0.0352569	0.0474791	0.754027	0.000210336	0.998893	0.234026	0.117492
LOC417372	0.167994	0.264426	-0.277451	0.0619277	0.34	0.0207846	-0.234471	0.116776	0.0578404	0.702597	-0.0455735	0.763609	-0.287117	0.0530291	0.182311	0.225261	0.00832242	0.956224	-0.247163	0.0977193	-0.643953	1.37767e-06
CHTF8	0.0491991	0.74541	0.277404	0.0619738	0.0998556	0.509081	-0.157185	0.296836	-0.101942	0.500227	-0.138759	0.357747	0.30466	0.0395263	-0.299167	0.043412	-0.0338345	0.82336	0.333696	0.0234301	-0.0224747	0.882142
COPZ1	0.0150503	0.920922	0.277252	0.0621229	-0.0612148	0.686116	-0.15009	0.319444	0.243023	0.103651	-0.101913	0.500348	0.288868	0.0515334	-0.38263	0.00867994	-0.0349724	0.817519	0.0679214	0.653788	-0.23242	0.120104
MGAT5	-0.102868	0.496321	0.277181	0.0621923	-0.450207	0.00169293	0.359669	0.014087	-0.0442487	0.770292	0.0427225	0.778011	0.0948897	0.530476	-0.217914	0.145715	0.150991	0.316515	0.047263	0.755112	0.0528652	0.727145
RGS3	0.0993879	0.511078	0.277047	0.0623239	-0.0962527	0.52456	0.0471491	0.755684	-0.155752	0.301318	0.269013	0.0706359	0.247442	0.0973291	-0.269458	0.0701538	0.078889	0.602269	0.0548957	0.717092	-0.0793144	0.600307
AAGAB	-0.220556	0.140772	0.276847	0.0625207	-0.0399638	0.792016	-0.0408327	0.787598	-0.29003	0.0505599	-0.0813947	0.590752	0.439466	0.00224531	-0.382712	0.00866437	0.0153623	0.919288	0.198767	0.185416	0.126415	0.402504
BACE1	-0.108781	0.471756	0.276784	0.0625834	0.0176007	0.907575	-0.0220663	0.884269	-0.0626364	0.679214	-0.177314	0.238448	0.198673	0.185628	0.0571816	0.705831	-0.0483552	0.749634	0.152824	0.310608	0.377379	0.00972518
KIF12	0.252411	0.0905798	0.276692	0.0626744	-0.120161	0.426364	0.0169576	0.910938	-0.283036	0.056651	0.107283	0.477916	0.0566612	0.70839	0.0681967	0.652474	0.12247	0.417461	0.142492	0.34483	-0.117152	0.438118
CC2D1A	-0.206946	0.167606	-0.276595	0.0627702	0.107494	0.477047	0.104229	0.490606	-0.0531258	0.725852	-0.187113	0.213069	-0.33571	0.022556	0.355836	0.0152241	-0.262571	0.0779152	0.0490128	0.746342	0.081628	0.589685
C5H11ORF9	0.0714528	0.63701	0.276441	0.0629219	0.0132101	0.930566	-0.265241	0.0748302	0.0951432	0.529373	-0.0845165	0.576541	-0.0742112	0.624028	0.0691327	0.648013	0.0134769	0.929167	-0.177988	0.23664	0.0501981	0.740418
NPTN	-0.0420993	0.781168	-0.27628	0.0630825	0.290314	0.0503244	0.101903	0.500391	0.00502169	0.973578	0.0510096	0.736372	-0.0398481	0.792605	-0.0807919	0.593514	-0.187479	0.212161	-0.277737	0.0616484	-0.0216304	0.88654
C9orf85	0.0158054	0.916968	0.275693	0.0636675	-0.276673	0.0626927	-0.186933	0.213519	-0.193986	0.196433	0.125093	0.407481	0.345567	0.0186615	-0.163305	0.278185	0.356661	0.0149729	0.476382	0.000817833	0.242885	0.103855
BUD31	0.200996	0.180435	0.275591	0.0637691	0.084293	0.577553	-0.39055	0.00728698	-0.0654432	0.665665	-0.0210936	0.889338	0.484517	0.000644568	-0.473897	0.000878508	0.0560691	0.711304	0.164696	0.274056	-0.079261	0.600554
ODC	0.0110905	0.941686	0.275399	0.0639624	-0.249279	0.0947908	0.300269	0.0426083	-0.00888614	0.953262	-0.106611	0.480695	0.294716	0.0467836	-0.223129	0.13608	0.0680857	0.653004	0.187046	0.213236	0.189397	0.207436
ADAM12	0.292505	0.048536	0.27535	0.064011	-0.19982	0.183052	-0.0675444	0.655589	-0.173644	0.248463	0.2114	0.158444	0.232593	0.119821	-0.0827187	0.584706	0.394714	0.00663562	0.0590299	0.696772	-0.0384014	0.799977
CAMK1D	-0.15156	0.314674	-0.275236	0.0641263	0.0566006	0.708688	-0.0497949	0.742431	0.136385	0.36611	-0.268871	0.0707904	0.321877	0.0291528	-0.396523	0.00636874	-0.00212617	0.988811	0.100755	0.505253	0.137577	0.361894
UBE2I	-0.284907	0.0549669	-0.275128	0.0642351	-0.0170611	0.910397	0.0820145	0.587918	0.147959	0.326444	-0.200071	0.18249	-0.298031	0.0442531	0.079983	0.597229	-0.00675426	0.964466	-0.240876	0.106836	-0.451382	0.00164051
C14orf159	0.0390304	0.79677	0.275121	0.064242	0.08415	0.578201	-0.120451	0.425237	-0.0980194	0.516941	0.0056318	0.970369	0.0647728	0.668892	0.0613674	0.685373	-0.102719	0.496945	-0.0595792	0.694087	0.405085	0.00522829
LOC107052408	-0.00159107	0.991627	0.275034	0.0643292	-0.247833	0.0967839	-0.0627765	0.678535	0.405915	0.00512781	0.0928459	0.539407	0.0744607	0.622859	-0.244804	0.101066	0.219123	0.143437	0.0714021	0.63725	0.181234	0.22806
C20orf112	-0.334223	0.0231988	-0.274994	0.0643701	-0.202357	0.17744	-0.00401904	0.978852	0.638846	1.77268e-06	-0.190464	0.204839	-0.0301485	0.842345	-0.115346	0.44526	-0.0645669	0.669883	0.00916312	0.951807	0.0230401	0.879199
UTRN	-0.00144489	0.992396	-0.274989	0.0643753	0.461927	0.00123094	-0.0647374	0.669062	0.251739	0.0914702	-0.485336	0.000629079	-0.39528	0.00655104	0.162892	0.279419	-0.307593	0.037572	-0.27217	0.0672708	-0.220911	0.140117
FGFR1OP2	0.0535816	0.723593	0.274977	0.0643874	-0.145756	0.333776	-0.352844	0.0161651	0.0180278	0.905343	0.0245521	0.871336	0.477881	0.000783065	-0.303856	0.0400767	0.255212	0.0869391	0.427308	0.00305787	0.348179	0.0177305
TCHP	-0.197651	0.187947	-0.274615	0.0647536	0.180243	0.230655	0.131451	0.383867	-0.213618	0.154021	-0.242213	0.104844	0.166305	0.269329	0.0687373	0.649896	0.0270008	0.858628	0.0109028	0.942671	0.177492	0.237969
LOC430766	0.0805085	0.594814	-0.274537	0.0648323	0.106806	0.479887	0.344407	0.019088	-0.09383	0.535098	-0.246211	0.0990604	-0.232721	0.119611	0.249909	0.0939319	-0.0516772	0.733048	0.00608654	0.967977	-0.102305	0.498691
GMPPA	-0.053394	0.724522	0.274433	0.0649381	-0.152334	0.312179	0.276964	0.0624058	-0.12141	0.421534	-0.124246	0.410688	0.296804	0.0451761	-0.344822	0.0189345	0.0425899	0.778682	0.213064	0.155117	0.191186	0.203096
FGFR3	0.169189	0.260995	0.274285	0.0650881	0.491741	0.000519131	-0.181847	0.226463	-0.182724	0.224193	0.0305528	0.840258	0.223549	0.135325	-0.309925	0.0360749	0.0527648	0.727643	0.196547	0.190475	0.0357652	0.813455
NFAT5	0.14915	0.322521	0.274181	0.0651947	-0.287353	0.0528257	0.0382645	0.800676	-0.0255186	0.866316	0.117644	0.436187	0.0948761	0.530535	0.0867937	0.566274	0.309892	0.0360954	-0.172534	0.251545	0.112387	0.4571
NECTIN1	-0.0354412	0.815116	-0.274176	0.0651992	0.0260405	0.863608	-0.139932	0.353656	0.310583	0.0356616	0.105765	0.484202	-0.259749	0.0812845	0.119449	0.429127	-0.222649	0.136945	-0.119266	0.429841	-0.261884	0.0787255
ABHD8	-0.0631648	0.676655	0.274151	0.0652249	-0.13466	0.372259	-0.131807	0.382569	-0.0230254	0.879275	-0.0251741	0.868104	0.28048	0.0590198	-0.15362	0.308062	0.0953516	0.528467	0.0433185	0.774994	0.0554217	0.714496
BRAT1	0.299289	0.0433219	0.274006	0.0653735	-0.112256	0.457628	-0.0794246	0.599799	0.229596	0.124802	0.355153	0.0154348	-0.128235	0.395706	0.106909	0.479462	-0.172748	0.250949	-0.184694	0.219153	0.0917204	0.544357
UBE3A	0.0476104	0.753368	0.273988	0.0653914	-0.192176	0.200722	-0.126692	0.401465	0.0824365	0.585992	0.0371986	0.80612	-0.121708	0.420387	0.212591	0.156059	-0.164354	0.275068	0.162749	0.279846	0.0773981	0.609168
ABCG1	-0.065386	0.665939	0.273801	0.0655831	-0.393405	0.00683468	-0.0900331	0.551817	0.367388	0.0120155	0.296058	0.0457452	-0.026861	0.859353	-0.183912	0.221143	0.100937	0.504483	0.00793995	0.958234	0.0297355	0.844478
PAPOLB	0.110298	0.46556	-0.273678	0.0657087	0.42809	0.00299871	-0.259448	0.0816499	0.0760114	0.615615	-0.348182	0.0177294	-0.280331	0.0591599	0.391472	0.00713825	-0.212089	0.15706	-0.302905	0.0407358	-0.14434	0.338546
ANP32A	-0.123233	0.414546	-0.273574	0.0658154	-0.107864	0.475524	-0.125541	0.405791	0.152603	0.311315	0.0846989	0.575716	0.122269	0.418234	-0.338208	0.0215097	-0.151171	0.315932	0.0113785	0.940174	-0.0373364	0.805415
GNPTAB	-0.175117	0.244409	0.273551	0.0658395	-0.138682	0.358016	-0.118668	0.432173	-0.0709052	0.6396	-0.0433696	0.774735	0.0664763	0.660703	0.0167263	0.912148	0.0228514	0.880181	0.14884	0.323538	0.245754	0.0997083
LMAN1L	0.152496	0.311657	-0.273539	0.0658519	0.469945	0.000983324	-0.370303	0.0113038	-0.129628	0.390554	-0.235557	0.115044	0.0259019	0.864327	0.061683	0.68384	-0.0265288	0.861075	0.233537	0.118283	-0.362845	0.0132004
TMEM258	0.133248	0.37734	0.273486	0.0659062	-0.0147182	0.922662	-0.0500575	0.74112	-0.298982	0.0435479	-0.119588	0.428587	0.66708	4.13996e-07	-0.208103	0.16519	0.296201	0.0456355	0.453637	0.00154397	0.234837	0.116191
ARFGEF2	-0.192044	0.201037	-0.273391	0.0660042	0.0418191	0.78259	0.0556935	0.713155	-0.0948819	0.53051	0.183535	0.222107	-0.181345	0.227769	0.135029	0.370941	0.119019	0.430806	-0.243791	0.10253	-0.438084	0.00232689
NUTF2	-0.0438348	0.772383	0.273241	0.0661589	-0.412651	0.00437306	-0.0607266	0.688491	-0.1099	0.467183	0.163998	0.276122	0.689394	1.16977e-07	-0.631368	2.54326e-06	0.585821	1.89302e-05	0.325529	0.027272	0.0675555	0.655536
PAIP1	0.00628587	0.966929	-0.272786	0.066629	0.188244	0.210268	0.0584148	0.699782	-0.229493	0.124976	-0.28294	0.0567385	-0.138283	0.359415	0.230449	0.123368	-0.00125483	0.993396	-0.0881904	0.560019	0.0202131	0.89393
PNISR	-0.123316	0.414229	0.272726	0.0666918	-0.189775	0.206512	0.188129	0.210551	0.00306209	0.983887	-0.161227	0.28443	0.0471542	0.755659	-0.200974	0.180483	-0.17542	0.243581	0.0973052	0.520015	0.0673443	0.656546
LOC101749244	0.138582	0.358367	0.272627	0.0667944	0.035717	0.813702	-0.116327	0.441374	0.0613833	0.685296	-0.0595286	0.694334	0.143807	0.34035	-0.118165	0.43414	0.0095463	0.949794	0.119106	0.430465	0.250023	0.093776
SMIM8	0.0338025	0.823525	0.272588	0.0668354	-0.245538	0.100016	-0.131312	0.384372	-0.0262012	0.862774	0.16604	0.270103	0.283809	0.0559507	-0.296961	0.0450573	0.300379	0.042529	-0.111164	0.462043	0.00505635	0.973395
EIF4E3	0.0979611	0.517192	0.272526	0.0669	-0.102891	0.496224	-0.0978758	0.517558	-0.113079	0.454315	-0.122005	0.419246	0.174704	0.24554	0.0604591	0.689794	0.139216	0.356148	-0.0438509	0.772302	0.206141	0.169301
MAN2A2	0.0587113	0.69833	-0.272524	0.0669018	0.413097	0.0043267	0.214766	0.151768	0.0350393	0.817176	-0.106773	0.480025	-0.445793	0.00190332	0.373946	0.0104658	-0.316578	0.0320716	-0.12271	0.416542	0.0951113	0.529512
SET	0.0360165	0.812168	-0.272278	0.067158	0.166867	0.267691	0.220745	0.140422	-0.0634433	0.675308	0.0153839	0.919175	-0.529299	0.000155459	0.645685	1.26349e-06	-0.01946	0.897861	-0.240565	0.107303	-0.0363133	0.810649
GABRA4	-0.379742	0.00924226	-0.272271	0.0671655	0.061515	0.684656	-0.0263792	0.86185	-0.198127	0.186866	0.131083	0.385209	-0.147155	0.329106	0.0859015	0.570287	-0.0457279	0.762832	-0.333169	0.0236638	-0.152661	0.31113
PPA2	0.0733439	0.628098	0.272195	0.0672443	0.114234	0.449692	-0.0379705	0.802176	0.0832923	0.582095	-0.0547372	0.717875	0.310037	0.036004	-0.302624	0.0409323	0.108727	0.471979	-0.0112677	0.940756	-0.066688	0.659689
RWDD2B	0.202464	0.177205	0.27191	0.0675434	-0.0771786	0.610187	-0.0296606	0.844865	-0.159724	0.289003	-0.152227	0.312524	0.0386677	0.798619	-0.0521347	0.730773	-0.0855472	0.571884	0.426928	0.00308694	0.0397185	0.793265
FRMD3	-0.156158	0.300043	-0.271846	0.0676105	0.393768	0.00677899	0.150742	0.317324	-0.271808	0.0676502	-0.00143103	0.992469	-0.233321	0.118633	0.231941	0.12089	-0.281225	0.0583213	-0.0201784	0.894111	-0.0391821	0.795997
SDK1	-0.0909573	0.547725	-0.271657	0.0678088	0.134679	0.372193	0.082789	0.584386	0.577987	2.59467e-05	-0.218758	0.14412	-0.11803	0.434672	-0.177018	0.239244	-0.310686	0.0355967	-0.180768	0.229277	-0.2158	0.149759
JMY	0.162053	0.281936	0.271654	0.0678119	-0.0127362	0.933051	-0.148667	0.324106	0.168759	0.262228	-0.0848769	0.574911	0.176191	0.241484	-0.115792	0.443493	-0.085533	0.571948	0.125215	0.407022	0.45667	0.00142207
NRG4	0.040519	0.789192	-0.271476	0.0679997	0.472805	0.00090641	-0.214009	0.153251	-0.183591	0.221964	0.0853388	0.572824	-0.115391	0.445083	0.161426	0.283827	-0.0703942	0.642021	-0.22952	0.12493	-0.063166	0.676649
UBE2E2	0.011917	0.937348	-0.271303	0.068182	0.162295	0.28121	-0.0813175	0.591105	-0.0781937	0.605482	-0.016015	0.915871	-0.534005	0.000132313	0.779858	1.68959e-10	-0.153589	0.308162	-0.271318	0.0681658	0.0448628	0.767192
BEGAIN	0.11342	0.45295	-0.271274	0.0682125	0.2773	0.0620759	-0.259791	0.0812338	-0.0472173	0.755342	0.077527	0.608571	-0.282361	0.0572696	0.156894	0.297742	-0.217165	0.147138	-0.355069	0.0154609	-0.716836	2.10214e-08
STEAP3	0.0310215	0.83784	0.271192	0.0682994	-0.108949	0.471067	-0.0818463	0.588687	-0.102071	0.499681	0.30014	0.0427015	0.455428	0.0014709	-0.38929	0.00749475	0.153746	0.307661	0.201033	0.180351	0.236691	0.113255
PRXL2A	0.0423035	0.780133	-0.271187	0.0683051	-0.240875	0.106836	-0.267259	0.0725621	0.242266	0.104766	0.0224157	0.882449	0.292806	0.048294	-0.0815612	0.58999	0.0544607	0.719242	0.23428	0.117084	-0.122956	0.415602
NR3C1	0.0217327	0.886007	-0.271088	0.0684101	-0.123609	0.413111	0.0546472	0.71832	-0.0818098	0.588853	-0.186591	0.214373	-0.0594259	0.694836	0.278073	0.0613215	-0.0972408	0.520292	0.00682834	0.964077	-0.0156325	0.917873
CELF4	-0.123753	0.412563	-0.271076	0.0684224	0.101375	0.502624	-0.228333	0.126947	0.19472	0.194713	0.241516	0.105878	-0.67125	3.29578e-07	0.583377	2.09058e-05	-0.369656	0.0114586	-0.382467	0.00871093	0.00979454	0.94849
CEP164	-0.0762132	0.614675	-0.271012	0.0684896	0.29765	0.0445381	-0.11934	0.429553	-0.197683	0.187876	-0.0934891	0.536589	0.0401809	0.790912	-0.0496013	0.743399	0.229207	0.12546	0.00961186	0.949449	-0.0115241	0.93941
LOC107052240	-0.0507583	0.737624	0.27101	0.068492	0.0123295	0.935184	-0.0775322	0.608546	-0.124751	0.408776	0.236312	0.11385	-0.0510594	0.736123	0.0276041	0.855503	-0.0169049	0.911214	0.0749379	0.620626	0.217591	0.146326
ARHGAP22	-0.0486764	0.748025	0.270908	0.0686007	-0.13074	0.386466	0.00379915	0.980009	-0.128824	0.393524	-0.0382831	0.800581	0.3741	0.0104314	-0.311494	0.0350953	0.208851	0.163641	0.1078	0.475787	0.13871	0.357918
LIMA1	-0.130718	0.386548	-0.270772	0.0687455	0.0928496	0.539391	0.0527132	0.727899	-0.187616	0.211821	0.00893747	0.952992	0.066095	0.662533	-0.102864	0.496334	0.215956	0.149458	-0.216893	0.147658	-0.117063	0.438468
SYNPO2	-0.0260212	0.863708	-0.27068	0.0688424	0.299299	0.0433151	-0.0232024	0.878354	0.401056	0.00574055	0.0165021	0.913322	-0.23069	0.122966	-0.0570701	0.706379	-0.30547	0.0389787	-0.319162	0.0306194	-0.0676634	0.655021
ACOX2	0.204112	0.173629	0.270652	0.0688728	-0.00588696	0.969027	0.180575	0.229782	-0.237995	0.111223	0.528026	0.000162326	0.0603987	0.690089	-0.31104	0.0353764	0.142542	0.344658	-0.0512267	0.73529	-0.0753261	0.618812
CFAP43	0.0284024	0.85137	0.270621	0.0689059	-0.0844245	0.576957	-0.0896936	0.553324	-0.141986	0.346563	0.301758	0.041542	0.199694	0.183332	-0.244584	0.101383	0.293659	0.0476149	0.00943593	0.950374	0.00355583	0.981289
KIAA1328	-0.0837261	0.580124	0.270577	0.0689528	-0.113941	0.450862	-0.0623625	0.680542	-0.0206605	0.891596	0.00528237	0.972207	0.244	0.102227	-0.282209	0.0574089	0.0893665	0.554778	0.00455555	0.97603	0.288824	0.0515709
MGAT3	-0.0816665	0.589509	0.27053	0.069003	-0.267636	0.0721447	0.0534898	0.724048	-0.0285346	0.850686	-0.355897	0.0152056	-0.0656008	0.664907	-0.000131554	0.999308	-0.007433	0.960898	-0.0713439	0.637525	-0.24913	0.0949949
SHANK2	0.00945082	0.950295	0.270479	0.0690573	0.00223916	0.988217	0.0299516	0.843362	0.325817	0.0271284	-0.211892	0.157455	-0.130826	0.38615	0.00215686	0.98865	-0.164153	0.275661	0.121821	0.419954	0.277574	0.0618076
FYN	-0.0235459	0.876567	-0.270345	0.0692	-0.074929	0.620668	0.641274	1.57335e-06	-0.188845	0.208787	-0.151784	0.313951	0.0683745	0.651626	0.0095604	0.94972	-0.035317	0.815752	-0.120033	0.426858	0.0206251	0.891781
SMURF2	0.0704046	0.641972	-0.270059	0.0695065	0.602562	9.38254e-06	0.134937	0.37127	-0.237974	0.111256	0.122017	0.419199	-0.181518	0.227318	0.01938	0.898278	-0.0762827	0.614352	-0.137808	0.361082	-0.29632	0.0455443
FGF1	0.0183165	0.903834	0.269956	0.0696176	-0.179874	0.231628	0.0387988	0.79795	-0.328199	0.0259623	0.00580481	0.969459	0.312683	0.0343679	-0.322081	0.0290447	0.185738	0.216513	0.0802439	0.596029	-0.16794	0.264583
ATG16L2	-0.157413	0.296126	0.269904	0.0696728	-0.222135	0.137879	0.0522834	0.730034	-0.0826948	0.584815	-0.0128288	0.932565	0.503214	0.000364495	-0.217911	0.14572	0.176471	0.240723	0.489186	0.000560722	0.425331	0.00321199
TM2D3	-0.107747	0.476007	0.269847	0.0697348	-0.347745	0.0178824	0.109594	0.468432	-0.0998477	0.509115	0.155889	0.300886	0.424877	0.00324831	-0.27355	0.06584	0.25026	0.093455	0.272404	0.0670266	0.430268	0.00283926
ERICH3	-0.00489643	0.974236	0.269821	0.0697623	-0.199619	0.1835	0.00292412	0.984613	-0.127279	0.399269	-0.144212	0.338979	0.277411	0.0619671	-0.0660896	0.662559	0.2504	0.0932663	0.198653	0.185674	0.358724	0.0143605
HACE1	0.106939	0.479339	0.269809	0.0697753	-0.0951659	0.529275	-0.0257802	0.864958	-0.121776	0.420126	0.125582	0.405637	0.121463	0.42133	0.0529382	0.726783	0.251423	0.0918926	0.0986152	0.514384	0.133602	0.376063
TXNDC5	0.184174	0.220476	-0.269745	0.0698445	0.0646187	0.669634	0.136553	0.365514	-0.164972	0.273242	-0.195155	0.193698	0.217369	0.146749	-0.0340796	0.822101	0.0504785	0.739019	0.101885	0.500466	0.126795	0.401079
PTPRS	-0.0019079	0.98996	0.269664	0.069931	0.121243	0.42218	-0.330026	0.0250967	0.0523088	0.729908	-0.262085	0.078488	0.00815369	0.95711	0.083546	0.580942	-0.0274313	0.856397	0.25864	0.0826397	0.075415	0.618397
NDUFS2	0.292594	0.0484644	0.269554	0.0700504	0.173104	0.249958	-0.098379	0.515397	-0.0828965	0.583896	-0.106845	0.479728	0.408954	0.00477421	-0.398285	0.00611783	0.284591	0.0552486	0.0579295	0.702161	0.027236	0.857409
CCDC28A	0.0417048	0.783169	-0.269335	0.0702864	0.0178326	0.906363	-0.0669878	0.658252	-0.164278	0.27529	0.168106	0.264105	0.371535	0.0110142	-0.206004	0.169592	0.123515	0.413471	0.22591	0.131141	0.0892858	0.555136
TTLL4	-0.0365708	0.80933	0.269065	0.0705791	-0.185125	0.218059	-0.142602	0.344454	0.156476	0.299047	-0.193767	0.19695	0.125661	0.405339	-0.125256	0.406868	0.0392163	0.795822	0.189823	0.206396	-0.153598	0.308134
EGFL7	-0.0746772	0.621845	-0.268915	0.0707423	-0.18064	0.229612	-0.0571478	0.705998	0.181705	0.226833	-0.225893	0.13117	-0.133951	0.374808	0.0570305	0.706574	-0.179854	0.231681	-0.0757531	0.616819	-0.244633	0.101313
ZBTB38	0.0229892	0.879464	-0.268906	0.0707526	0.463168	0.00118929	0.051167	0.735587	-0.292406	0.0486151	-0.112986	0.45469	-0.376148	0.0099855	0.308621	0.0369057	-0.302025	0.0413531	-0.0840718	0.578556	-0.26626	0.073678
EPB41	-0.141344	0.348773	-0.268833	0.0708319	0.300909	0.0421469	0.0916844	0.544515	0.195946	0.191862	-0.285128	0.0547706	-0.355109	0.0154485	0.115943	0.442895	-0.490776	0.000534497	-0.415281	0.00410588	-0.255077	0.0871117
ABLIM1	-0.0276603	0.855211	0.268777	0.0708931	0.304471	0.039655	-0.153505	0.30843	-0.246431	0.0987494	-0.205597	0.170455	-0.0242859	0.872719	0.0711067	0.638647	-0.123384	0.413967	-0.0757665	0.616757	0.274587	0.0647814
WDR92	0.256074	0.0858414	0.268541	0.0711508	-0.105108	0.48694	-0.0182483	0.90419	0.0613916	0.685256	-0.182922	0.223684	0.27116	0.0683331	-0.093838	0.535063	0.138305	0.359336	0.289303	0.0511676	0.116732	0.439775
RPL17	-0.0445774	0.768632	0.26854	0.0711518	-0.304914	0.0393541	-0.0530074	0.726439	-0.0277155	0.854926	-0.0891841	0.555589	0.807575	1.18991e-11	-0.67839	2.2115e-07	0.499722	0.000406444	0.450953	0.00165947	0.014617	0.923192
HBP1	0.130438	0.387574	0.268416	0.0712868	-0.21534	0.150651	0.333949	0.0233189	-0.0110414	0.941943	-0.0990107	0.512691	0.058317	0.700261	-0.0137794	0.927581	0.140738	0.350864	0.142415	0.345094	0.114263	0.449574
SACS	0.0276562	0.855233	0.268364	0.0713437	-0.181063	0.228506	0.136878	0.364363	-0.0247252	0.870436	-0.0775945	0.608258	-0.139065	0.356677	0.169927	0.258891	-0.0432921	0.775127	-0.0705287	0.641383	0.0420993	0.781169
STXBP5L	0.171995	0.253052	0.26834	0.0713705	0.116312	0.441435	-0.341447	0.0202139	0.339111	0.0211415	0.0613766	0.685329	-0.0939496	0.534575	0.135572	0.369002	-0.11725	0.437732	0.111005	0.462689	0.258726	0.082534
CDK9	0.235548	0.115057	0.268238	0.0714826	0.15873	0.292052	-0.0216221	0.886583	-0.0883109	0.559481	-0.214622	0.152049	0.270197	0.0693584	-0.163497	0.277612	0.169095	0.261264	0.221819	0.138454	0.0562731	0.7103
CNBP	-0.118332	0.433486	0.268112	0.0716205	-0.106931	0.479369	0.136506	0.365682	0.190624	0.204453	-0.0600457	0.69181	0.223625	0.135189	-0.435036	0.00251607	0.142345	0.345332	0.112899	0.455041	-0.301872	0.0414614
OTUD7B	0.221261	0.139475	0.26799	0.0717547	-0.197713	0.187807	-0.327442	0.026328	0.21476	0.15178	-0.0793549	0.60012	0.17739	0.238243	0.0255144	0.866338	0.215174	0.150974	0.132049	0.381688	0.121054	0.422908
ZC3H13	-0.061816	0.683194	-0.267633	0.0721486	0.108554	0.472689	0.0378504	0.80279	-0.277561	0.0618204	-0.0558817	0.712228	-0.0250619	0.868687	0.201485	0.179354	0.102718	0.496949	-0.158216	0.293638	0.0399816	0.791925
ZNF207	-0.192648	0.199598	0.267626	0.0721561	-0.394263	0.00670364	0.0909353	0.547822	-0.108707	0.472059	-0.234903	0.116085	0.304336	0.0397477	-0.177676	0.237475	0.238575	0.110329	-0.00224883	0.988166	-0.162378	0.28096
WAPL	-0.130956	0.385676	-0.267505	0.0722893	0.205267	0.171156	-0.133326	0.377059	0.0143765	0.924452	-0.147304	0.328614	-0.217621	0.14627	0.199794	0.183108	-0.204768	0.172222	-0.155397	0.302433	0.0541678	0.72069
BASP1	0.0360999	0.811741	-0.267502	0.0722931	-0.189473	0.207249	0.0776521	0.607991	-0.157765	0.295035	-0.0915291	0.5452	0.129682	0.390353	0.111838	0.459317	0.00240238	0.987358	0.0114882	0.939598	0.0433652	0.774758
LOC107053144	-0.037922	0.802424	0.267401	0.0724055	-0.107254	0.478035	-0.0872538	0.56421	-0.0692241	0.647579	-0.0383688	0.800143	0.318574	0.030945	-0.300395	0.0425169	0.332514	0.0239567	0.190376	0.205052	0.0670236	0.658081
PIK3CG	0.00305156	0.983942	-0.267334	0.0724787	0.226505	0.1301	0.0877886	0.561815	0.193024	0.198705	-0.320066	0.0301246	-0.514547	0.000253847	0.315754	0.0325464	-0.4718	0.000932795	-0.119904	0.427358	-0.253758	0.0888143
NAA25	0.136422	0.36598	-0.26716	0.0726729	-0.0463712	0.759594	0.00176372	0.990718	-0.297063	0.0449802	0.352382	0.0163146	-0.111614	0.460223	0.330975	0.0246565	0.159432	0.289897	-0.0785874	0.603662	0.237666	0.111733
BAP1	0.0342731	0.821108	0.266846	0.0730215	-0.151121	0.316092	0.0737501	0.62619	-0.149544	0.32123	-0.131985	0.381919	0.241457	0.105967	-0.0517734	0.732569	-0.0554557	0.714328	-0.0182762	0.904045	0.120072	0.426707
RNF220	0.113512	0.45258	-0.266825	0.073046	0.163407	0.277879	-0.0341864	0.821553	-0.154774	0.304399	-0.265491	0.074546	0.0941073	0.533886	-0.0643164	0.671092	0.0333887	0.825651	-0.0525773	0.728574	-0.103784	0.492474
YIPF1	0.0988763	0.513266	0.266715	0.0731684	-0.148864	0.323459	0.05948	0.694572	-0.0911258	0.54698	-0.222251	0.137667	0.376803	0.00984625	-0.304943	0.0393345	0.131392	0.38408	0.265248	0.0748223	-0.0805802	0.594485
LOC107049046	0.0622446	0.681113	0.26667	0.0732191	-0.150407	0.318413	-0.0655976	0.664922	-0.157114	0.297057	-0.0151504	0.920398	0.563075	4.62645e-05	-0.332274	0.0240644	0.436278	0.0024374	0.250112	0.0936566	0.0388505	0.797687
TRPC1	0.0367314	0.808509	-0.266618	0.0732771	0.4297	0.00288016	-0.212645	0.155951	-0.0760651	0.615365	0.00587398	0.969095	-0.142271	0.345588	0.25098	0.0924852	0.0409822	0.786838	-0.11335	0.453229	-0.026948	0.858902
LOC107054318	0.146044	0.332813	0.266576	0.0733243	-0.145271	0.335405	-0.084015	0.578813	-0.100664	0.505641	0.343688	0.0193564	0.152431	0.311869	-0.0313082	0.836362	0.347866	0.01784	0.120361	0.425586	0.0208049	0.890843
TMEM196	0.0715419	0.636589	0.266568	0.0733322	-0.312837	0.0342748	0.333796	0.0233863	-0.310357	0.0358027	-0.00727087	0.961751	0.26287	0.0775646	-0.186664	0.214188	0.421849	0.00350007	-0.0570246	0.706603	-0.1875	0.212108
SCEL	-0.263782	0.0765035	-0.266289	0.073645	0.00145836	0.992325	-0.0200793	0.894628	-0.174337	0.246549	0.0141019	0.925891	-0.0174702	0.908258	0.0739679	0.625169	0.163555	0.277438	-0.0300848	0.842674	0.142167	0.345943
CRTC1	-0.022034	0.884437	0.266281	0.0736547	-0.203571	0.174798	0.220523	0.140833	-0.197417	0.188482	0.414296	0.00420419	-0.0124153	0.934734	-0.0569648	0.706897	0.206346	0.168869	-0.184611	0.219363	0.168363	0.263365
TMEM38B	-0.0201982	0.894008	0.266259	0.073679	-0.10113	0.503664	-0.00299213	0.984255	0.0448433	0.76729	-0.106616	0.480674	0.0226269	0.88135	0.157565	0.295653	-0.208546	0.164272	0.127167	0.399686	0.19685	0.18978
GNAS	0.0217635	0.885847	0.266236	0.0737045	-0.00968927	0.949043	-0.0723995	0.632542	-0.0253786	0.867043	-0.134369	0.373306	-0.0162499	0.914641	0.114668	0.44796	0.014848	0.921982	0.0181837	0.904528	-0.132181	0.381208
ZFYVE27	0.0746994	0.621742	0.266151	0.0738004	-0.157999	0.29431	0.436866	0.00240088	-0.288611	0.0517511	-0.085833	0.570595	-0.0234157	0.877244	-0.0801825	0.596312	0.012997	0.931683	-0.00408158	0.978523	-0.374677	0.0103042
ARHGEF1	0.268398	0.0713068	0.266143	0.0738095	-0.143307	0.342049	-0.0690003	0.648643	-0.170679	0.256757	0.375854	0.0100485	0.0165214	0.913221	-0.0198446	0.895853	0.135457	0.369411	0.207843	0.16573	-0.0528383	0.727278
APOO	-0.187995	0.210881	0.26598	0.0739929	-0.403284	0.00545218	0.451022	0.00165644	0.197807	0.187593	-0.125518	0.405877	0.178684	0.234781	-0.320827	0.029713	0.313013	0.0341683	0.0393575	0.795103	0.166215	0.269591
CDK13	0.048566	0.748578	0.265874	0.0741125	-0.228757	0.126224	0.303352	0.0404247	-0.158202	0.293682	0.523384	0.000189751	-0.158172	0.293775	-0.00765278	0.959743	-0.0160085	0.915905	-0.292344	0.0486655	0.116525	0.440593
NET1	0.102408	0.498258	0.265864	0.0741244	-0.26113	0.0796213	0.15479	0.304348	-0.205787	0.17005	0.376125	0.00999038	0.0158994	0.916476	0.0935743	0.536216	0.0788362	0.602513	0.01371	0.927945	-0.0450899	0.766047
RPAP2	0.0334072	0.825556	-0.265814	0.0741803	0.15864	0.292329	-0.23005	0.124037	-0.202524	0.177074	0.414094	0.0042246	0.0143682	0.924496	0.0020091	0.989427	-0.0695126	0.646206	-0.0583264	0.700215	0.0357079	0.813749
YLPM1	-0.104253	0.490508	0.265786	0.0742124	-0.0723422	0.632812	-0.0669218	0.658569	-0.138054	0.360219	-0.19822	0.186654	0.344661	0.0189939	-0.174856	0.245125	-0.159939	0.288344	0.083959	0.579067	0.152483	0.311701
DPH5	0.0787576	0.602876	0.265784	0.0742145	-0.255905	0.0860554	-0.111176	0.461995	-0.123244	0.414503	-0.157538	0.295737	0.587186	1.79034e-05	-0.348686	0.0175542	0.238075	0.1111	0.280492	0.0590084	0.15097	0.316583
STK32C	-0.141922	0.346786	0.265735	0.0742697	-0.137414	0.362468	-0.135895	0.367852	-0.152602	0.311318	-0.127086	0.399991	0.224239	0.134092	-0.105064	0.487122	0.140737	0.350865	0.172012	0.253006	0.0597373	0.693315
LOC101750312	0.422301	0.00346143	0.265471	0.0745687	0.463789	0.00116893	0.22283	0.136619	-0.295046	0.0465266	-0.0208984	0.890356	0.00320337	0.983143	-0.141138	0.349483	-0.0412959	0.785245	0.126661	0.40158	-0.0693359	0.647047
PAPSS2	-0.0468037	0.757419	0.265303	0.0747592	-0.0974954	0.519195	-0.309175	0.0365507	0.323741	0.0281798	0.101452	0.502299	0.0289374	0.848603	-0.0215766	0.88682	0.107803	0.475775	-0.0341953	0.821507	0.161718	0.282945
PUM2	-0.0922877	0.541859	-0.265288	0.074776	-0.0216943	0.886207	-0.30666	0.0381849	0.556752	5.86313e-05	-0.0889398	0.556677	-0.349769	0.0171832	0.169304	0.260665	-0.327484	0.0263077	-0.125031	0.407717	-0.243846	0.10245
GUK1	0.0315521	0.835105	0.265195	0.074882	-0.101882	0.500477	-0.175043	0.244613	-0.102371	0.498415	0.0865836	0.567218	0.36945	0.0115081	-0.141442	0.348434	0.29577	0.0459667	-0.0259313	0.864174	0.253624	0.0889895
DPF3	0.0936949	0.535689	0.265082	0.0750114	-0.202181	0.177824	-0.21294	0.155365	0.335977	0.0224419	0.357675	0.0146693	-0.125597	0.405578	-0.060578	0.689215	-0.0893914	0.554667	0.131262	0.384555	0.148223	0.32557
KIF20A	0.148809	0.323641	0.265023	0.0750785	-0.128258	0.395624	0.145789	0.333667	-0.266871	0.0729943	0.495161	0.0004678	-0.0454751	0.764105	0.0603543	0.690305	0.0389431	0.797214	-0.149194	0.322376	-0.0991648	0.512031
NCOA5	0.143091	0.342785	-0.264832	0.0752968	0.0634327	0.675359	-0.161347	0.284066	-0.0197713	0.896236	0.314694	0.0331661	-0.190895	0.203797	0.372704	0.0107453	0.233613	0.11816	-0.194022	0.196349	-0.000956709	0.994965
FAM175A	0.0277945	0.854517	0.26475	0.0753896	-0.299509	0.0431611	-0.226501	0.130108	0.23702	0.112739	0.155282	0.302796	0.277388	0.0619889	-0.295843	0.0459103	0.0723102	0.632963	0.0859001	0.570293	0.171031	0.255763
TMEM125	-0.0400016	0.791824	0.26456	0.0756081	-0.208972	0.163391	0.19271	0.199451	0.170281	0.257884	-0.0267028	0.860173	0.121221	0.422262	-0.308499	0.0369845	-0.00325899	0.982851	0.0539375	0.72183	-0.102233	0.498997
LOC769329	-0.0893663	0.554778	0.264217	0.0760015	-0.140196	0.352738	-0.0797245	0.598418	-0.109031	0.470732	-0.102243	0.498953	0.369898	0.0114005	-0.266357	0.0735693	0.273596	0.0657933	0.0579958	0.701835	0.163617	0.277254
ASB3	-0.0728664	0.630343	-0.264078	0.0761622	0.48792	0.000582433	-0.19732	0.188704	-0.175217	0.244136	-0.175445	0.243513	-0.181181	0.228196	0.0556426	0.713406	-0.0422782	0.780262	-0.313519	0.0338641	-0.343886	0.0192825
TET1	-0.0817354	0.589193	-0.264058	0.0761848	0.307701	0.0375013	-0.315581	0.0326472	-0.127406	0.398794	-0.00355754	0.98128	-0.0730236	0.629604	0.117804	0.435558	-0.479563	0.000745657	-0.203883	0.174125	-0.0527338	0.727797
ARPP21	-0.377639	0.00967099	-0.264003	0.0762479	0.186286	0.215135	0.0642068	0.671621	0.292499	0.0485408	-0.1546	0.304949	-0.174525	0.246032	-0.0215178	0.887127	0.122711	0.416538	-0.0818326	0.588749	0.0870263	0.56523
CACNB2	0.232516	0.119946	-0.263914	0.0763515	0.219116	0.14345	-0.30727	0.0377831	0.0404597	0.789493	-0.0510568	0.736136	-0.0201462	0.89428	0.208508	0.16435	0.155316	0.302689	-0.00080611	0.995758	0.168513	0.262932
COL27A1	-0.0249115	0.869469	0.263887	0.0763824	-0.141739	0.347414	0.3145	0.0332804	-0.126525	0.402092	-0.0634589	0.675233	0.0355345	0.814637	-0.0640799	0.672233	0.141126	0.349522	0.16694	0.267479	0.253618	0.088997
NALCN	0.0366301	0.809027	0.263825	0.0764543	-0.0304269	0.840908	0.108202	0.474132	-0.0847594	0.575442	0.259222	0.0819257	-0.0999558	0.508655	0.169178	0.261026	-0.11377	0.451547	0.0575414	0.704064	0.417719	0.00387109
LIMCH1	0.0817879	0.588954	-0.263744	0.0765483	0.196336	0.190962	-0.218265	0.14505	0.0463402	0.75975	0.164938	0.273342	-0.236255	0.113939	0.186728	0.214029	-0.355568	0.0153066	-0.21445	0.152387	-0.0755987	0.61754
PCDH11X	-0.0761751	0.614853	-0.263571	0.076748	-0.0889374	0.556688	0.0449433	0.766786	0.334268	0.0231789	0.10328	0.494585	-0.38616	0.00803299	0.346924	0.0181726	-0.182054	0.225925	-0.224839	0.133027	0.214276	0.152726
TIA1	0.116326	0.441379	-0.263517	0.0768105	0.0652418	0.666633	0.04446	0.769225	0.469045	0.0010087	0.0785092	0.604024	-0.331194	0.0245557	0.115271	0.445561	-0.256844	0.0848708	-0.230242	0.123714	0.0849825	0.574433
H2AZ2	0.262806	0.0776402	0.263362	0.0769907	-0.152893	0.310386	-0.00802906	0.957765	-0.0386201	0.798862	-0.118964	0.43102	0.767994	4.69459e-10	-0.542195	9.93706e-05	0.113848	0.451234	0.409425	0.00472137	0.107677	0.476294
SZRD1	-0.110727	0.463816	0.263161	0.0772247	-0.118945	0.431091	0.249199	0.0948998	-0.0959384	0.525921	-0.093815	0.535163	0.151353	0.315342	-0.09428	0.533133	0.217579	0.146349	0.33964	0.0209283	0.120731	0.424158
DNAJA4	-0.188888	0.208683	-0.263093	0.0773047	-0.0815967	0.589828	-0.108272	0.473844	-0.209287	0.162744	-0.24071	0.107085	0.00533399	0.971935	0.250179	0.0935654	0.159807	0.288748	0.10485	0.488012	0.0981665	0.516309
SLC25A25	-0.0563089	0.710123	-0.262636	0.0778389	0.187182	0.212897	-0.240439	0.107491	0.13872	0.357882	-0.12587	0.404551	-0.321339	0.0294388	0.305619	0.0388785	-0.292518	0.0485254	-0.127848	0.397146	-0.174001	0.247476
NLGN1	-0.0710206	0.639054	0.262521	0.0779742	-0.0572323	0.705582	0.157315	0.296432	0.0494557	0.744127	-0.062248	0.681097	0.0718411	0.635176	-0.128508	0.394696	0.182949	0.223614	-0.0667206	0.659532	0.217225	0.147023
LCOR	-0.112989	0.45468	0.262519	0.0779771	-0.022959	0.879621	0.233419	0.118475	-0.142387	0.345191	0.05585	0.712384	0.226345	0.13038	-0.3012	0.0419389	0.167833	0.264891	0.125337	0.406559	0.273398	0.0659971
BUB3	-0.179163	0.233508	-0.262491	0.0780091	0.182477	0.224831	-0.242728	0.104085	-0.00398597	0.979026	0.00517912	0.97275	0.169093	0.261271	-0.104209	0.490692	-0.0822104	0.587024	0.30404	0.03995	0.239468	0.108963
CARF	-0.148811	0.323635	0.262411	0.0781031	-0.0776932	0.6078	-0.0280951	0.85296	-0.0609427	0.687439	-0.0387614	0.798141	0.0865595	0.567326	0.0107601	0.94342	-0.0943047	0.533025	0.153107	0.3097	0.386131	0.00803816
RFC2	0.084583	0.57624	0.262345	0.0781814	-0.196083	0.191546	-0.160708	0.286002	0.0329105	0.82811	-0.10214	0.499388	0.388709	0.00759226	-0.181345	0.22777	0.108876	0.471368	0.478525	0.000768558	0.387443	0.00780855
TMA16	0.0918232	0.543904	0.262343	0.0781831	-0.29235	0.0486608	-0.119242	0.429936	-0.149322	0.321956	0.0227112	0.88091	0.364264	0.01282	0.0750457	0.620122	0.35664	0.0149794	0.371916	0.0109259	0.444394	0.00197468
GSTK1	-0.00205468	0.989187	0.262268	0.078272	0.0433922	0.774621	0.169687	0.259573	0.0437627	0.772748	-0.0570711	0.706374	0.0665506	0.660347	-0.368045	0.0118519	-0.0365084	0.80965	0.261724	0.078915	-0.0900265	0.551846
CSNK2A1	-0.191599	0.202104	-0.262192	0.0783612	0.00467238	0.975415	0.179179	0.233465	-0.113179	0.453915	-0.31364	0.0337917	-0.228172	0.127223	0.35288	0.0161536	-0.172212	0.252446	-0.23994	0.108246	-0.152299	0.312293
ITGA6	-0.316207	0.0322848	-0.261506	0.0791739	0.147567	0.327739	-0.13594	0.367692	-0.118457	0.433	-0.411982	0.00444333	0.119276	0.429802	-0.120664	0.424415	-0.0491716	0.745547	0.0495262	0.743774	-0.348464	0.0176311
TASP1	0.0643142	0.671102	-0.261482	0.0792028	0.0405535	0.789017	-0.135875	0.367921	-0.155236	0.302941	-0.227953	0.127598	0.0749035	0.620787	0.160779	0.285785	-0.00968075	0.949088	0.134639	0.372336	-0.151279	0.315581
RARRES2	0.0988229	0.513494	0.261469	0.0792181	0.00671011	0.964699	0.0284578	0.851083	-0.317854	0.0313478	0.0335873	0.824631	0.471288	0.000946509	-0.59136	1.50722e-05	0.304304	0.0397694	0.152488	0.311684	-0.189586	0.206974
NEDD8	-0.000792314	0.99583	0.261325	0.0793886	-0.151104	0.316148	0.281506	0.0580594	-0.290286	0.0503474	-0.083791	0.57983	0.258063	0.0833506	0.00700257	0.963161	0.192998	0.198766	0.229931	0.124237	0.0381294	0.801365
MBD4	0.291547	0.0493109	0.261285	0.0794367	-0.0782796	0.605085	-0.0331136	0.827066	-0.105065	0.487116	-0.027658	0.855223	0.282393	0.0572396	-0.0736413	0.626701	-0.0875817	0.562741	0.288654	0.0517148	0.145147	0.335823
HBS1L	-0.0360593	0.811949	0.261083	0.0796774	-0.30201	0.0413637	0.347198	0.0180755	0.268617	0.0710674	-0.218394	0.144806	0.0785997	0.603606	-0.0287971	0.849328	0.0990504	0.512521	0.148817	0.323613	0.1715	0.254442
SLC30A6	0.0120186	0.936815	0.260937	0.079853	-0.267267	0.0725539	0.384293	0.00836984	-0.0729961	0.629733	-0.213112	0.155022	-0.0518122	0.732376	0.174122	0.247143	0.178694	0.234755	0.0112752	0.940716	0.12627	0.403049
SPTAN1	0.0612631	0.685881	0.260855	0.079951	-0.127212	0.39952	0.0198033	0.896069	-0.283816	0.0559438	0.131138	0.385008	0.314715	0.0331534	0.0684887	0.651081	0.251429	0.0918844	0.160213	0.28751	0.549553	7.63427e-05
RAB5B	0.213898	0.153469	0.260719	0.0801134	-0.0513394	0.734729	-0.221203	0.139581	0.11967	0.428271	-0.0288084	0.84927	0.368741	0.0116804	-0.412653	0.00437277	0.183268	0.222793	0.0764081	0.613768	-0.15896	0.291345
LOC427010	0.0883495	0.559309	-0.260526	0.080346	-0.134797	0.371768	0.104118	0.491073	0.260183	0.0807586	0.302363	0.0411154	-0.334659	0.0230087	0.0916672	0.544591	-0.0891647	0.555675	-0.175473	0.243437	-0.173981	0.247532
SH2D3C	0.225608	0.13167	0.260472	0.0804107	-0.216753	0.147927	-0.167626	0.265491	-0.21433	0.152621	0.439057	0.00226919	0.125179	0.407158	-0.020084	0.894604	0.273296	0.0661016	0.0639539	0.672841	0.0223505	0.882788
IL6ST	-0.206446	0.168657	-0.260326	0.0805869	0.298851	0.0436443	0.0397218	0.793248	-0.172122	0.252698	-0.241916	0.105284	-0.0547893	0.717618	0.163208	0.278473	-0.018584	0.902436	-0.0332351	0.826441	0.081126	0.591982
ARNT	0.106129	0.482694	0.260239	0.0806913	-0.0985167	0.514807	-0.173399	0.249141	0.317854	0.0313474	-0.112813	0.455386	0.35709	0.0148437	-0.303576	0.0402697	-0.0721133	0.633891	0.126544	0.402019	0.429727	0.00287821
PEX1	0.154855	0.304143	-0.26023	0.0807026	0.26291	0.0775183	-0.194205	0.195919	0.203579	0.174781	0.413242	0.00431167	-0.263013	0.0773974	0.160424	0.286867	-0.238222	0.110873	-0.109011	0.470816	-0.0462214	0.760348
DYNLT1	-0.128558	0.394509	-0.260225	0.0807086	0.0273385	0.856878	0.30521	0.0391537	-0.323391	0.0283606	0.352968	0.0161252	0.113919	0.450949	-0.29052	0.0501534	0.287112	0.0530333	0.210518	0.160229	-0.0494677	0.744067
PODXL	-0.199536	0.183687	-0.260163	0.080783	0.247339	0.0974728	0.446308	0.00187766	-0.259777	0.081251	-0.254471	0.0878907	-0.367075	0.0120941	0.252856	0.0899939	-0.0689429	0.648917	-0.0936854	0.53573	-0.0537182	0.722916
PLEKHH1	0.0174942	0.908132	0.25989	0.0811139	-0.270174	0.0693836	0.118798	0.431668	-0.17714	0.238916	0.171019	0.255795	0.32477	0.0276547	-0.209933	0.161421	0.315685	0.0325867	0.20647	0.168607	0.128864	0.393375
RRN3	-0.0856985	0.571201	-0.25985	0.0811626	0.225839	0.131264	-0.270913	0.0685953	-0.269236	0.0703936	-0.086925	0.565685	0.149183	0.322411	0.0661048	0.662486	0.0860378	0.569673	0.26706	0.072784	0.1712	0.255287
NFYA	-0.157603	0.295536	-0.259839	0.0811751	-0.209783	0.161727	-0.196296	0.191054	0.462952	0.00119646	0.000299858	0.998422	-0.0970357	0.521177	-0.016528	0.913186	-0.000320632	0.998313	0.0894316	0.554488	-0.189432	0.20735
LDAH	0.030484	0.840613	0.259759	0.0812721	-0.0732972	0.628317	-0.0271022	0.858102	-0.156815	0.297987	-0.102627	0.497334	0.386362	0.00799725	-0.181899	0.226329	0.239186	0.109393	0.207945	0.165518	0.414157	0.00421822
PAFAH1B2	-0.00750044	0.960544	0.259646	0.0814101	-0.189014	0.208373	-0.0567536	0.707935	-0.247301	0.0975263	-0.0120631	0.936582	0.302344	0.0411286	-0.172374	0.251993	0.107682	0.476271	0.305678	0.0388388	0.149692	0.320746
MRPL17	-0.10409	0.491188	0.259527	0.0815547	-0.366876	0.0121442	0.285501	0.0544407	-0.106418	0.481493	-0.182598	0.224518	0.560113	5.17256e-05	-0.426965	0.00308414	0.191969	0.201217	0.321927	0.0291261	0.149228	0.322265
ZMIZ1	0.205349	0.170982	0.259273	0.0818637	0.350573	0.0169119	-0.317853	0.0313479	0.0971036	0.520884	0.0109312	0.942522	0.0276902	0.855056	-0.157247	0.296643	-0.104569	0.489188	-0.0461722	0.760595	0.394342	0.00669172
LSM6	-0.110751	0.463718	0.259145	0.0820205	-0.273339	0.0660578	-0.340958	0.0204053	0.130948	0.385705	0.119752	0.427951	0.455212	0.00147954	-0.428882	0.00293987	0.120419	0.425362	0.172464	0.25174	-0.0579107	0.702253
BEND4	-0.259741	0.0812943	-0.259078	0.082102	-0.0491169	0.745821	0.00929998	0.951088	-0.127705	0.39768	-0.0282924	0.851939	-0.114118	0.450155	0.0958448	0.526327	-0.157694	0.295253	-0.0521405	0.730744	-0.156109	0.300196
BIN1	-0.226804	0.129582	-0.259019	0.0821747	0.174187	0.246963	0.0308144	0.838909	0.0290305	0.848121	-0.203576	0.174787	-0.250275	0.0934353	0.33385	0.0233624	-0.273913	0.0654683	-0.155141	0.303242	0.444694	0.0019592
CLCN7	0.0048742	0.974353	0.258982	0.0822193	0.176059	0.24184	-0.0177291	0.906904	-0.125202	0.407068	-0.200272	0.182041	0.138498	0.35866	-0.181685	0.226885	0.343336	0.0194891	-0.021588	0.886761	-0.0464261	0.759318
ISLR	0.312073	0.0347395	0.258731	0.0825273	-0.120556	0.424834	-0.131054	0.385317	-0.140998	0.349963	0.140588	0.351382	0.042272	0.780293	0.166825	0.267813	0.237001	0.112769	-0.0673568	0.656486	-0.023603	0.87627
WNK1	0.0779047	0.606821	0.258577	0.0827163	-0.0746382	0.622028	0.221767	0.138548	0.0354794	0.81492	-0.0295398	0.845489	0.134441	0.373047	-0.274848	0.0645175	0.0914451	0.54557	0.0748249	0.621155	0.041712	0.783133
LOC121107743	0.0921796	0.542335	-0.258562	0.0827352	-0.0978098	0.517842	-0.126267	0.40306	0.300813	0.0422162	0.235581	0.115006	-0.456562	0.00142624	0.603164	9.14195e-06	-0.0994276	0.510908	-0.139027	0.356808	0.30288	0.0407528
TRPC4AP	0.188436	0.209794	-0.258439	0.0828872	0.431481	0.00275378	0.0352865	0.815908	-0.195859	0.192063	-0.257265	0.0843439	-0.360831	0.0137569	0.508998	0.000303517	-0.0241262	0.873549	-0.187624	0.211801	0.0201631	0.894191
PHRF1	0.0320872	0.832348	-0.258006	0.0834218	0.138549	0.358482	-0.000884719	0.995344	0.00194929	0.989742	-0.204164	0.173518	-0.242468	0.104467	0.29263	0.0484351	-0.141416	0.348525	-0.075389	0.618519	-0.0327636	0.828866
CCDC12	-0.101939	0.500237	-0.257936	0.0835088	-0.0251136	0.868419	-0.159342	0.290171	-0.0352237	0.81623	0.0600144	0.691963	0.193318	0.198009	0.0142328	0.925205	-0.100259	0.507362	0.148136	0.325859	0.307549	0.0376007
FKBP15	0.0533262	0.724859	-0.2579	0.0835536	0.299202	0.0433857	0.215668	0.150016	-0.202947	0.176152	-0.217963	0.14562	-0.14295	0.343266	0.309819	0.0361417	-0.123194	0.414695	-0.130885	0.385933	0.318354	0.0310676
SNTB1	0.106731	0.480199	0.257875	0.0835843	0.0568005	0.707705	0.0746711	0.621874	-0.185632	0.216781	-0.133905	0.374972	-0.176175	0.241526	0.165499	0.27169	0.0774607	0.608878	-0.27498	0.0643835	-0.206815	0.16788
LOC107053511	0.0868114	0.566195	0.257771	0.083713	-0.00277277	0.985409	-0.0647378	0.66906	-0.0396547	0.793589	0.0723538	0.632757	-0.0454482	0.764241	0.10033	0.507062	-0.0609894	0.687212	0.172687	0.251119	0.134067	0.374391
LOC107049008	0.12299	0.415471	0.25767	0.0838388	-0.181198	0.228153	-0.169145	0.261121	0.0840108	0.578832	0.36805	0.0118505	0.212495	0.156249	-0.272929	0.0664808	0.103397	0.494097	0.123681	0.412839	0.23758	0.111867
SLC6A9	-0.116935	0.438974	-0.257664	0.0838464	0.119965	0.427121	-0.0930306	0.538597	-0.338419	0.0214233	-0.107277	0.477943	0.036021	0.812145	0.0657557	0.664162	-0.0474036	0.754406	0.176632	0.240289	-0.314789	0.0331103
TBC1D16	-0.138034	0.360289	0.257381	0.0841988	-0.0821382	0.587353	-0.0919217	0.54347	-0.053594	0.723532	-0.0501359	0.740729	0.319071	0.0306697	-0.200854	0.180749	0.0979558	0.517215	0.123837	0.412244	0.25761	0.0839134
CD200	-0.024844	0.869819	0.257239	0.0843755	-0.123808	0.412353	-0.0852012	0.573445	-0.113529	0.452512	-0.0443662	0.769699	0.360831	0.0137569	-0.242194	0.104872	0.181848	0.226461	0.22193	0.138251	0.190615	0.204475
ANKDD1A	-0.0470284	0.75629	0.25719	0.0844366	-0.0163753	0.913985	0.0422389	0.780461	-0.0619027	0.682772	-0.0743325	0.623459	0.159555	0.289518	-0.133132	0.377759	0.0827565	0.584534	0.111441	0.46092	0.146755	0.330439
LOC100859691	-0.0814281	0.590599	-0.257052	0.0846094	0.183021	0.223429	-0.136645	0.365187	0.358609	0.014394	0.0243341	0.872469	-0.140424	0.351951	0.0662167	0.661949	-0.028667	0.850001	-0.145443	0.334827	0.07838	0.604621
PSMD13	0.001803	0.990512	0.256857	0.0848544	0.121258	0.42212	-0.148215	0.325596	0.298279	0.0440678	0.0936662	0.535814	0.149078	0.322757	-0.410198	0.0046358	-0.142313	0.345442	-0.0395627	0.794058	0.202898	0.176259
CAPN10	-0.0764103	0.613758	-0.256716	0.0850313	-0.00453507	0.976137	0.183879	0.221227	-0.071846	0.635153	-0.286343	0.0537012	-0.186523	0.214543	0.274509	0.0648608	-0.205218	0.17126	-0.0832383	0.582341	-0.189584	0.206978
PITPNM3	-0.0347621	0.818598	0.256514	0.0852862	0.0138476	0.927223	-0.201007	0.180408	-0.235059	0.115836	0.213971	0.153326	0.231574	0.121496	-0.110283	0.465622	0.0454003	0.764482	0.16572	0.271042	-0.0342641	0.821154
MYO1E	0.087131	0.564761	0.256462	0.0853508	-0.290022	0.0505667	-0.240056	0.10807	0.0930378	0.538565	0.0815451	0.590064	0.287957	0.0523077	-0.0438879	0.772115	-0.0187207	0.901722	0.20748	0.166487	0.22966	0.124694
IBA57	0.0317983	0.833836	0.25637	0.0854672	0.13091	0.385843	-0.0292943	0.846758	-0.0537326	0.722845	-0.129013	0.392822	0.180843	0.22908	-0.114085	0.450286	-0.124347	0.410308	0.0379424	0.80232	0.23891	0.109816
LOC422353	0.072602	0.631588	0.256245	0.0856247	-0.238782	0.110011	0.0239655	0.874385	-0.204191	0.17346	0.0304342	0.84087	0.169966	0.258779	0.0643675	0.670845	0.37906	0.0093795	-0.0159026	0.916459	0.368436	0.0117554
DNAJB6	-0.0682908	0.652025	-0.256245	0.0856254	0.0524587	0.729163	0.233034	0.119101	0.0156219	0.917929	-0.283275	0.0564338	-0.274365	0.0650074	0.382807	0.00864647	-0.23034	0.123551	-0.104992	0.487422	0.134817	0.371699
SMARCC1	4.04511e-05	0.999787	-0.256207	0.0856736	-0.129665	0.390417	-0.179715	0.232047	0.231097	0.122288	-0.053288	0.725048	-0.177658	0.237524	0.333004	0.0237371	-0.299706	0.0430175	0.0127195	0.933138	0.355512	0.0153236
FAM184A	-0.0385503	0.799217	0.256202	0.0856802	-0.111584	0.460341	-0.130038	0.389042	-0.00188642	0.990073	-0.0964599	0.523664	0.128133	0.396087	0.0371556	0.806339	-0.179987	0.231328	0.0146678	0.922926	0.25855	0.0827496
MTF1	0.0731507	0.629006	-0.256122	0.0857813	0.432094	0.0027114	-0.016489	0.91339	0.203019	0.175995	-0.139646	0.354649	-0.159985	0.288204	-0.151903	0.313566	-0.213586	0.154084	0.0305106	0.840476	-0.35899	0.014283
CHST8	-0.155031	0.303586	-0.255979	0.0859623	0.443116	0.00204194	-0.00141384	0.99256	-0.0839321	0.579189	-0.193292	0.19807	-0.329309	0.0254332	0.319133	0.0306352	-0.161229	0.284422	-0.146227	0.332201	0.142773	0.343869
PPP3CA	-0.0984319	0.51517	-0.255923	0.0860337	0.155703	0.301471	-0.1839	0.221173	0.163472	0.277688	0.0652712	0.666492	-0.569195	3.66134e-05	0.707504	3.8515e-08	-0.396499	0.00637225	-0.288674	0.0516979	0.241165	0.106403
CLEC16A	-0.231042	0.12238	-0.255783	0.086211	-0.143573	0.341145	-0.250615	0.0929768	0.797683	3.21416e-11	-0.178066	0.23643	-0.172266	0.252294	0.0538326	0.72235	-0.129131	0.392388	-0.0703931	0.642026	0.02814	0.852728
RRP1B	0.15618	0.299972	-0.255607	0.0864353	0.438235	0.00231785	0.00571531	0.96993	-0.158701	0.292143	-0.0306606	0.839702	-0.380849	0.0090231	0.189753	0.206568	-0.327572	0.0262649	-0.269462	0.0701496	-0.49078	0.000534432
SERPING1	0.0629311	0.677786	0.255592	0.0864544	-0.162592	0.280316	-0.0683583	0.651703	0.0220704	0.884247	0.065538	0.665209	0.133168	0.377632	-0.0968302	0.522064	0.0617006	0.683754	0.185312	0.217587	0.142307	0.345466
SNRPGP15	0.222797	0.136678	0.25552	0.0865453	-0.0591499	0.696185	0.162198	0.2815	-0.132882	0.378666	-0.252354	0.0906551	0.316699	0.0320025	-0.120131	0.42648	0.033605	0.82454	0.131315	0.384361	0.261141	0.0796092
SGTA	0.22997	0.124171	0.255519	0.086547	-0.032351	0.83099	0.00477784	0.97486	-0.240041	0.108093	0.241494	0.105911	0.0214912	0.887265	0.173791	0.248056	0.129943	0.389392	0.267069	0.072774	0.376137	0.00998781
BMPR2	0.157316	0.296429	-0.255511	0.0865566	-0.00266045	0.986	0.0782003	0.605452	0.0255307	0.866253	-0.0514647	0.734105	-0.44365	0.0020136	0.456842	0.00141542	-0.145389	0.33501	-0.191975	0.201202	-0.105931	0.483515
CCDC149	-0.189163	0.208008	0.255491	0.0865831	-0.0564851	0.709256	-0.242766	0.104028	0.0804105	0.595264	-0.21263	0.15598	0.280911	0.0586144	-0.337734	0.0217049	-0.289852	0.0507083	0.336626	0.0221674	0.21726	0.146956
LHFPL2	-0.000151176	0.999204	0.255454	0.0866301	-0.289023	0.0514032	0.414621	0.00417148	-0.0278154	0.854408	-0.0776974	0.607781	0.327193	0.0264493	-0.22325	0.135862	0.339791	0.0208679	0.0972881	0.520088	0.160708	0.286004
KARS	0.0543552	0.719764	0.255365	0.0867439	-0.134402	0.373187	-0.0539275	0.72188	0.00235017	0.987633	-0.0759105	0.616086	0.292858	0.0482527	-0.21173	0.15778	0.45142	0.00163883	0.0899675	0.552108	0.0149051	0.921682
SLC30A3	0.337639	0.0217444	0.255128	0.0870465	0.0578139	0.702727	-0.0269254	0.859019	-0.182648	0.224389	0.0981096	0.516554	0.271121	0.0683741	-0.0679796	0.65351	0.188219	0.210328	-0.0932562	0.537608	-0.0698963	0.644384
RAP1GAP1	0.348609	0.017581	0.255115	0.0870635	-0.127221	0.399484	-0.137981	0.360474	-0.115061	0.446397	0.192486	0.199982	0.0432964	0.775105	0.132499	0.380054	-0.21081	0.159636	0.265685	0.0743261	0.411618	0.00448206
LOC107054313	0.0722549	0.633224	0.255114	0.087065	-0.194601	0.19499	-0.00387989	0.979584	-0.0780099	0.606333	0.0445456	0.768793	0.413798	0.0042547	-0.411515	0.00449309	0.046328	0.759811	0.444209	0.00198433	0.296656	0.0452884
SEMA7A	-0.0482317	0.750253	0.255008	0.0872006	-0.208999	0.163335	-0.15699	0.297444	-0.142634	0.344346	0.642421	1.48664e-06	0.186356	0.21496	-0.163547	0.277462	0.280402	0.0590926	-0.00805029	0.957654	0.261784	0.0788437
COL4A6	-0.0578824	0.702391	0.254928	0.0873024	-0.0264999	0.861225	0.0215586	0.886914	0.211244	0.158759	0.212035	0.157169	0.0785381	0.60389	-0.224494	0.133639	0.139639	0.354676	-0.0869592	0.565531	0.0750631	0.620041
COBLL1	-0.20343	0.175103	0.254892	0.0873489	-0.166575	0.268541	0.210069	0.161143	-0.215494	0.150352	-0.0144393	0.924123	-0.0538101	0.722461	0.0230323	0.879239	0.105345	0.485951	0.00549595	0.971083	-0.0359066	0.812731
TMEM234	-0.0152889	0.919672	0.254845	0.0874097	-0.273453	0.0659403	-0.0617035	0.68374	0.0946598	0.531477	0.0430067	0.776572	0.357764	0.0146428	-0.458984	0.0013349	0.227358	0.128621	-0.0574902	0.704316	-0.0277158	0.854924
LARS	-0.0300845	0.842675	0.25481	0.0874547	-0.219115	0.143451	-0.0716335	0.636156	-0.0996007	0.510169	0.041781	0.782783	0.319311	0.0305375	-0.116788	0.439555	0.0166196	0.912707	0.0194991	0.897657	0.192671	0.199542
TK2	0.147202	0.328953	0.254752	0.0875292	0.147931	0.326534	0.0684775	0.651134	-0.0263211	0.862152	-0.150566	0.317894	-0.185525	0.21705	0.332847	0.0238072	-0.177845	0.237021	-0.275111	0.0642522	0.22827	0.127054
LOC112530487	-0.142855	0.343591	-0.254698	0.0875988	-0.328095	0.0260123	-0.0779039	0.606824	0.237139	0.112553	0.26469	0.0754586	-0.0209285	0.890199	-0.0580653	0.701495	0.295216	0.0463947	0.11757	0.436475	-0.240516	0.107377
RNF19A	-0.121421	0.421493	-0.253971	0.0885378	-0.111208	0.461866	-0.12158	0.420879	-0.124291	0.41052	0.101604	0.501656	0.0403599	0.790001	0.139877	0.353847	0.325255	0.0274097	-0.0873572	0.563747	0.202521	0.17708
ECE1	0.0171152	0.910114	-0.253965	0.0885456	0.499298	0.000411829	-0.269698	0.0698947	-0.212167	0.156905	-0.243155	0.103458	0.11971	0.428114	-0.0815349	0.59011	-0.0101063	0.946853	-0.0462114	0.760398	-0.113149	0.454035
ST3GAL1	0.190819	0.203982	-0.253914	0.088612	0.362413	0.0133181	-0.112081	0.458333	-0.0876166	0.562585	-0.133651	0.375887	-0.0641201	0.672039	0.250358	0.0933226	-0.123945	0.411834	0.0703698	0.642137	0.126023	0.403977
UBE2D1	0.0433014	0.77508	-0.253702	0.0888873	-0.0400574	0.79154	0.0214779	0.887335	-0.162135	0.281689	-0.143238	0.342286	0.0334085	0.825549	-0.0446784	0.768123	0.0265079	0.861183	0.0497436	0.742688	-0.652479	8.94947e-07
SCAPER	-0.033839	0.823337	-0.253689	0.0889046	0.229028	0.125763	-0.103692	0.492857	-0.102127	0.499443	-0.142725	0.344035	-0.0983149	0.515672	0.260969	0.0798138	0.00930543	0.951059	0.0793096	0.600329	0.148585	0.324376
SPTY2D1	0.0987655	0.51374	-0.253585	0.0890403	0.306273	0.0384414	-0.240046	0.108086	-0.0718582	0.635095	0.0177766	0.906656	0.0954235	0.528155	0.00604251	0.968209	-0.131562	0.383461	0.0403148	0.79023	0.0913732	0.545888
PPIG	-0.0675566	0.655531	0.253452	0.0892126	-0.164766	0.273847	0.402338	0.00557307	0.244713	0.101198	0.178833	0.234385	-0.328896	0.0256293	0.0518912	0.731983	-0.180032	0.231212	-0.163608	0.277282	0.00476381	0.974934
MRPL23	0.187841	0.211262	0.253069	0.0897143	-0.0667653	0.659318	-0.294238	0.0471575	0.239945	0.108239	0.0226319	0.881323	0.279835	0.0596294	-0.229641	0.124725	0.0786236	0.603495	0.142512	0.344763	0.0277769	0.854608
AGO2	0.174313	0.246615	0.252829	0.0900294	0.163767	0.276807	-0.185763	0.216448	-0.196305	0.191034	0.298689	0.043764	0.122901	0.415814	-0.0129682	0.931834	0.211493	0.158257	0.0577927	0.702831	0.1853	0.217617
SPCS1	0.269676	0.069918	0.252775	0.0901006	-0.358694	0.0143693	0.112184	0.457918	-0.046203	0.76044	0.263167	0.0772177	0.33963	0.0209324	-0.236711	0.113223	0.209727	0.161841	0.130311	0.388039	-0.0254094	0.866883
IQCK	0.0961844	0.524856	0.25273	0.0901598	-0.0641691	0.671802	-0.20656	0.168417	0.0394207	0.794781	0.284712	0.0551402	0.0138955	0.926972	-0.149908	0.32004	-0.0131494	0.930884	-0.0916867	0.544505	-0.217894	0.145752
RPS6KA5	-0.138512	0.358611	0.252684	0.0902198	-0.104679	0.488729	0.254784	0.0874876	-0.0348186	0.818308	-0.189438	0.207336	-0.295553	0.0461336	0.40831	0.00484741	-0.376	0.010017	-0.0350029	0.817363	0.297478	0.0446671
PHF12	-0.096547	0.523287	0.252683	0.090221	-0.0493073	0.744868	-0.111202	0.461892	0.103599	0.493247	-0.130641	0.38683	0.363895	0.0129181	-0.317096	0.0317761	0.00729903	0.961603	0.181504	0.227356	0.374358	0.0103745
BEND3	-0.0373665	0.805262	0.252631	0.0902896	-0.202689	0.176714	0.390438	0.00730526	-0.134461	0.372974	-0.212207	0.156824	0.0279463	0.85373	0.0878187	0.561681	0.109215	0.469979	0.119014	0.430823	0.0479252	0.751789
SMAP1	0.0651317	0.667163	-0.252594	0.0903383	-0.0442251	0.770411	0.036955	0.807365	-0.0544083	0.719501	-0.267836	0.0719239	0.0249636	0.869198	0.15973	0.288985	-0.132762	0.379099	0.186278	0.215155	-0.0981487	0.516386
FAN1	0.318069	0.0312271	0.252453	0.0905246	0.210885	0.159485	-0.168223	0.263766	-0.17656	0.240483	-0.0863812	0.568128	0.135663	0.368678	0.0855467	0.571886	0.0834498	0.58138	-0.0473345	0.754753	0.257822	0.08365
PPIH	-0.116079	0.442356	0.252403	0.090591	-0.45052	0.0016788	-0.155587	0.301834	-0.0052331	0.972466	0.0805659	0.594551	0.670487	3.43706e-07	-0.408714	0.00480135	0.558752	5.44258e-05	0.316671	0.0320183	0.361434	0.0135882
GARNL3	0.145797	0.33364	-0.2524	0.0905947	0.0861605	0.56912	-0.241331	0.106154	-0.250621	0.0929685	-0.0137935	0.927507	-0.402512	0.00555064	0.623391	3.69896e-06	-0.192644	0.199606	-0.104322	0.490217	-0.0704724	0.641651
SLC12A2	-0.0422199	0.780557	-0.252274	0.0907614	-0.0862526	0.568706	0.167859	0.264816	0.059651	0.693736	-0.117617	0.436292	-0.0649167	0.668198	-0.00790778	0.958403	-0.0291553	0.847476	-0.123528	0.413421	-0.424494	0.00327924
ELAPOR2	-0.255108	0.0870717	-0.252138	0.0909416	0.101446	0.502325	0.142213	0.345785	-0.0311294	0.837283	0.0466986	0.757948	-0.219214	0.143266	0.178084	0.236383	-0.213029	0.155186	0.00397291	0.979095	0.0555807	0.713711
BHLHE41	0.318416	0.0310327	0.252075	0.0910241	-0.0722399	0.633294	0.101464	0.502247	-0.11162	0.460196	0.53108	0.0001463	-0.116881	0.439187	0.14474	0.337193	0.254019	0.0884756	-0.161243	0.28438	0.0468328	0.757273
ACLY	-0.0450855	0.766069	-0.252004	0.0911188	0.11381	0.451385	0.0400078	0.791792	0.0912774	0.546311	0.215175	0.150971	-0.36371	0.0129675	0.0574574	0.704477	-0.0831374	0.5828	-0.0125391	0.934084	-0.376109	0.00999382
ADAMTS3	-0.183988	0.220949	-0.251985	0.0911433	-0.176523	0.240582	0.434406	0.00255682	-0.171796	0.253609	0.191555	0.202209	-0.326149	0.026963	0.267498	0.0722975	0.0708389	0.639914	-0.104908	0.487773	0.104553	0.489252
RLTPR	0.0671012	0.65771	0.251942	0.0912009	-0.0661569	0.662236	0.0251177	0.868398	0.0119938	0.936945	-0.0427071	0.778088	0.267353	0.0724587	-0.134854	0.371565	-0.0362722	0.810859	0.440494	0.0021863	0.213656	0.153947
ANKRD50	-0.0810906	0.592144	0.251932	0.0912147	-0.288867	0.0515345	0.709028	3.49461e-08	-0.265665	0.0743494	0.109281	0.46971	-0.0772347	0.609926	-0.131912	0.382186	0.123247	0.414493	-0.117217	0.437863	-0.108241	0.473972
RHOT2	-0.325714	0.0271798	-0.251855	0.091317	-0.0716809	0.635932	-0.205515	0.170628	0.190119	0.205676	-0.116085	0.442333	0.0252144	0.867895	0.0169537	0.910959	0.323278	0.0284192	-0.121545	0.421015	0.0939555	0.534549
ATVR1	-0.101945	0.500212	-0.251815	0.0913699	-0.0662158	0.661953	0.254194	0.0882488	0.0233299	0.877691	-0.157936	0.294503	-0.253694	0.0888973	0.231956	0.120867	-0.173435	0.249042	0.105983	0.483298	-0.242279	0.104746
GAD1	-0.161464	0.283712	-0.251795	0.0913957	0.316962	0.0318521	0.236215	0.114003	0.208334	0.16471	-0.256756	0.0849815	-0.444124	0.00198872	0.303083	0.0406113	-0.174396	0.246387	-0.157762	0.295043	0.0429998	0.776607
KLHL9	0.0679364	0.653717	-0.251764	0.0914381	0.4394	0.00224917	-0.0381456	0.801282	0.119725	0.428055	0.116834	0.439372	-0.282782	0.0568832	0.100477	0.506435	-0.14149	0.34827	-0.160769	0.285819	-0.187764	0.211452
EIF2B3	0.123742	0.412604	-0.251323	0.0920252	0.430431	0.00282766	-0.260849	0.0799585	-0.350506	0.0169343	-0.0341758	0.821607	0.185363	0.217458	-0.0769313	0.611335	-0.142293	0.345511	-0.215009	0.151294	-0.313303	0.0339934
NETO2	0.148042	0.32617	-0.251321	0.0920279	0.0454518	0.764223	-0.118372	0.433333	-0.0224305	0.882372	0.287515	0.0526863	-0.431426	0.00275762	0.662523	5.28979e-07	0.0156618	0.91772	-0.223901	0.134694	0.175038	0.244624
TTL	0.15885	0.291683	0.251198	0.0921929	-0.0854176	0.572468	-0.00690876	0.963654	-0.208326	0.164727	-0.0747915	0.621311	0.354107	0.0157622	-0.142761	0.343911	0.158014	0.294263	0.285619	0.0543361	0.342394	0.019848
C8orf37	0.173559	0.248698	0.251145	0.0922639	-0.24532	0.100327	0.0590323	0.69676	-0.10276	0.496772	0.0103223	0.945719	0.196139	0.191417	-0.0688922	0.649158	0.0528906	0.727019	0.0739239	0.625375	0.487315	0.000593068
SCARB1	0.000615461	0.996761	0.251104	0.0923193	-0.190247	0.205366	-0.129347	0.391589	0.0576912	0.703329	-0.0380797	0.801619	0.491756	0.000518902	-0.463319	0.00118433	0.0556204	0.713516	0.171759	0.253714	0.233641	0.118114
HEATR5A	0.07339	0.627881	0.251093	0.0923331	0.0397373	0.793169	0.424301	0.00329497	-0.339361	0.0210407	-0.0690243	0.648529	0.0845557	0.576364	-0.0499482	0.741666	0.14	0.353422	0.072157	0.633685	0.0831967	0.58253
PABIR3	-0.136599	0.365352	0.251046	0.0923966	-0.420117	0.00365172	0.0848804	0.574895	0.0124239	0.934689	0.201641	0.17901	0.284282	0.0555254	-0.178865	0.234301	0.071011	0.639099	0.0766968	0.612425	0.306339	0.0383978
DYNLL1	0.133395	0.37681	0.251023	0.0924271	-0.395186	0.00656511	-0.250854	0.092654	0.00279855	0.985273	-0.0126554	0.933475	0.592043	1.46504e-05	-0.322115	0.0290268	0.178643	0.234891	0.425731	0.00318026	0.16992	0.25891
MPV17L2	-0.045974	0.761592	0.251022	0.0924285	0.144873	0.336745	0.152521	0.311579	-0.343105	0.0195766	-0.0815934	0.589843	0.172995	0.250262	-0.208123	0.165148	0.0637185	0.673978	0.0646878	0.669301	-0.108341	0.47356
HACD2	0.121172	0.422451	0.250828	0.092689	-0.15743	0.296075	0.210803	0.159651	-0.157867	0.294718	0.606125	8.03916e-06	-0.124415	0.410046	-0.0773792	0.609256	0.238069	0.111108	-0.131069	0.38526	-0.173113	0.249935
TTPAL	-0.0732023	0.628763	-0.250781	0.0927529	-0.202801	0.17647	-0.152269	0.312389	0.0712559	0.637941	-0.0906555	0.54906	-0.342199	0.0199228	0.553343	6.64886e-05	0.0718623	0.635076	-0.119984	0.427048	-0.330563	0.0248467
LOC101748294	0.0149401	0.921499	0.25043	0.0932262	-0.192369	0.200262	0.0407973	0.787777	0.30491	0.039357	-0.058544	0.699149	0.0205891	0.891969	-0.0845792	0.576257	0.153501	0.308442	-0.118445	0.433044	0.125936	0.404303
C22orf23	-0.204445	0.172915	0.250414	0.0932471	-0.179816	0.231782	0.633481	2.29882e-06	-0.0435526	0.77381	-0.224035	0.134456	0.0342824	0.82106	-0.337611	0.0217559	0.13988	0.353835	-0.188285	0.210165	-0.148836	0.323552
TRMT9B	0.181235	0.228056	0.250273	0.0934378	-0.151314	0.315468	-0.0425754	0.778756	-0.129172	0.392237	0.559824	5.22886e-05	0.12006	0.426756	-0.0583736	0.699984	0.203611	0.174712	-0.110722	0.463836	0.194096	0.196174
ZBTB8OS	-0.193243	0.198186	0.250246	0.0934744	-0.0960902	0.525264	-0.0662464	0.661806	-0.046759	0.757644	-0.0131972	0.930633	0.23311	0.118976	-0.183325	0.222646	0.0978607	0.517623	0.0775979	0.608242	0.336847	0.0220745
LOC769000	0.147044	0.329476	0.250062	0.0937242	0.030968	0.838116	0.0750184	0.62025	0.29811	0.0441942	-0.0207137	0.891319	-0.132772	0.379063	-0.0714532	0.637008	-0.0566698	0.708348	-0.0878028	0.561752	0.0697858	0.644908
SH3BGRL	-0.166987	0.267344	-0.2498	0.0940795	-0.216031	0.149313	-0.0382224	0.80089	0.271695	0.0677694	-0.328079	0.0260199	-0.205512	0.170634	0.382619	0.008682	-0.0506285	0.738271	-0.121546	0.421009	-0.0771673	0.610239
KDM1B	0.021166	0.888961	-0.249472	0.094527	0.635996	2.03639e-06	-0.0902828	0.55071	0.0495282	0.743764	0.0461858	0.760527	-0.4317	0.00273856	0.265448	0.0745944	-0.517302	0.000232025	-0.144163	0.339145	0.0852571	0.573193
RAPGEF1	-0.162121	0.28173	0.249384	0.0946471	-0.186067	0.215685	-0.137065	0.363701	0.0535911	0.723546	0.0931005	0.538291	0.26678	0.0730956	-0.302665	0.0409031	0.0390141	0.796853	-0.0250349	0.868827	0.417678	0.00387486
TMEM106C	-0.0364463	0.809968	0.249226	0.0948625	-0.2898	0.0507515	0.308862	0.0367509	-0.0725034	0.632053	-0.18388	0.221226	0.280019	0.059455	-0.272873	0.0665395	0.192698	0.199478	0.0919617	0.543294	0.0573459	0.705024
LMO2	0.0507607	0.737612	-0.249189	0.0949131	-0.0512148	0.73535	-0.119967	0.427116	-0.00123009	0.993527	0.336286	0.0223109	-0.43687	0.00240067	0.496286	0.000451938	-0.267177	0.0726533	-0.286165	0.0538574	0.0687717	0.649732
PISD	0.12325	0.414481	0.249008	0.0951621	-0.0192286	0.899069	0.0112544	0.940825	-0.0367044	0.808647	0.021078	0.889419	-0.00931016	0.951034	-0.020089	0.894578	0.0682524	0.652208	0.0140783	0.926014	0.165954	0.270355
SMG1	-0.204367	0.173082	0.248845	0.0953858	-0.0876706	0.562344	0.0880479	0.560656	-0.0605558	0.689323	-0.0567292	0.708055	0.191282	0.202866	-0.0613632	0.685394	0.0227592	0.880661	0.0579683	0.70197	0.450863	0.00166349
CTSA	-0.0191281	0.899594	0.248796	0.0954532	0.0865212	0.567498	0.423608	0.00335182	-0.0653898	0.665921	-0.300675	0.0423155	0.129312	0.391719	-0.315093	0.0329318	0.048117	0.750828	0.0830061	0.583397	0.19715	0.189093
SLC31A1	0.0294562	0.845921	0.248719	0.0955583	-0.237577	0.111872	0.0317742	0.83396	-0.0146948	0.922784	0.14929	0.32206	0.24285	0.103906	-0.342719	0.0197233	0.237383	0.112173	-0.0699937	0.643921	0.131134	0.385024
RESF1	-0.0781108	0.605866	-0.248471	0.0959002	-0.0811582	0.591835	-0.236093	0.114195	0.369325	0.0115385	-0.261119	0.0796355	-0.308372	0.0370662	0.21745	0.146596	-0.227775	0.127904	-0.0329951	0.827675	-0.215632	0.150085
CCDC47	-0.0122413	0.935646	-0.248448	0.0959325	0.0389227	0.797319	-0.0383617	0.80018	-0.303627	0.0402348	0.152707	0.310981	0.0321447	0.832052	0.266668	0.0732213	0.126928	0.40058	0.0880035	0.560855	-0.0470706	0.756078
NPL	0.167554	0.265699	0.248437	0.0959472	-0.204135	0.17358	-0.288425	0.0519087	0.237404	0.11214	0.0375582	0.804282	0.217732	0.146059	-0.26657	0.0733305	0.189682	0.20674	0.120315	0.425767	-0.262095	0.0784758
DDX27	0.116951	0.43891	0.248369	0.0960415	-0.155172	0.303143	-0.215109	0.1511	0.292181	0.0487971	-0.157775	0.295003	0.339762	0.0208794	-0.290028	0.050562	0.00327399	0.982772	0.06424	0.67146	-0.114843	0.447263
GPCPD1	0.0514456	0.7342	0.248347	0.0960717	-0.266291	0.0736433	-0.17821	0.236045	0.150483	0.318166	-0.213991	0.153287	0.503619	0.000359883	-0.322267	0.0289466	0.24671	0.0983559	0.512074	0.000274991	0.0804117	0.595259
WIPF1	-0.330116	0.0250543	-0.248249	0.0962076	-0.0659877	0.663048	0.147161	0.329088	-0.12819	0.395876	-0.278892	0.0605303	-0.19872	0.185523	0.207675	0.166081	0.257671	0.083838	-0.320286	0.0300049	-0.282435	0.0572014
HIST1H2A4L2	-0.0149126	0.921643	-0.248115	0.0963933	-0.0434974	0.774089	-0.107905	0.475354	0.522188	0.000197465	-0.172015	0.252996	0.166695	0.268194	-0.260149	0.0807997	-0.106406	0.481542	0.22084	0.140249	-0.2828	0.0568663
NFRKB	0.201505	0.17931	0.248076	0.096447	-0.197052	0.189318	0.345944	0.0185247	-0.160489	0.286667	-0.141037	0.349832	0.155182	0.303111	-0.0502438	0.74019	-0.0528253	0.727343	0.317397	0.0316051	0.214263	0.152753
SYBU	0.0462378	0.760265	-0.247934	0.096644	0.183292	0.222733	-0.362294	0.0133508	0.136417	0.365995	0.107963	0.475114	-0.112394	0.457072	0.172347	0.252069	0.070632	0.640894	0.0238772	0.874844	-0.0682273	0.652328
WDR45	0.0193474	0.898449	0.247911	0.0966767	-0.197483	0.188331	0.035455	0.815045	0.205238	0.171218	-0.004977	0.973813	0.0421893	0.780713	-0.0526517	0.728204	-0.0776298	0.608094	0.000125669	0.999339	0.0918558	0.54376
TNRC6C	-0.0498745	0.742034	0.24785	0.0967612	0.155627	0.30171	0.0024228	0.98725	-0.0251336	0.868315	0.0692105	0.647643	-0.120632	0.424537	-0.234287	0.117072	-0.0581487	0.701086	-0.0450533	0.766231	0.0112227	0.940992
GLCCI1	-0.172435	0.251823	0.24778	0.0968587	-0.211223	0.158801	0.0798924	0.597645	0.15954	0.289565	-0.149087	0.322728	-0.0490959	0.745926	0.00661079	0.965221	-0.131586	0.383372	0.0106306	0.9441	0.0843421	0.577331
CSRP1	0.0604411	0.689882	0.247533	0.097202	-0.154276	0.305976	0.30121	0.0419316	0.0486376	0.74822	0.345326	0.0187494	0.0443141	0.769962	-0.204287	0.173253	0.227507	0.128365	-0.129985	0.389238	-0.117961	0.43494
CFAP74	-0.0381982	0.801014	0.247483	0.0972722	-0.13188	0.382302	-0.0784905	0.60411	-0.0667661	0.659314	-0.0346864	0.818986	0.478807	0.000762276	-0.395233	0.006558	0.189538	0.207091	0.195783	0.192241	0.336516	0.0222137
FKBP5	0.548256	8.00109e-05	0.247479	0.097277	0.0290773	0.847879	0.0307176	0.839408	-0.15642	0.299221	0.515322	0.000247525	0.161199	0.284513	-0.174167	0.247018	0.26146	0.0792281	0.0357	0.813789	-0.000657154	0.996542
SIPA1L2	-0.215626	0.150096	-0.247432	0.0973426	0.0184343	0.903218	0.463104	0.00119141	0.287162	0.0529901	-0.325889	0.0270926	-0.215332	0.150667	0.0404323	0.789633	-0.248493	0.09587	-0.00170321	0.991037	-0.0312598	0.836612
PFDN2	0.28791	0.052348	0.247019	0.0979205	0.069202	0.647684	0.123653	0.412942	-0.280854	0.0586681	-0.0116279	0.938865	0.465757	0.00110646	-0.382602	0.00868537	0.124142	0.411085	0.058228	0.700697	-0.29888	0.0436229
SEC16A	0.211524	0.158194	0.246944	0.098026	-0.249086	0.0950539	0.0292921	0.846769	-0.250039	0.0937547	-0.270095	0.0694677	0.0755134	0.617938	0.162276	0.281265	0.268188	0.0715376	0.137662	0.361595	-0.0185885	0.902412
TRAF5	-0.146287	0.332	0.246694	0.0983784	-0.100234	0.507468	0.0320203	0.832692	-0.0129856	0.931743	0.0547585	0.71777	0.175486	0.243402	-0.205734	0.170164	0.0835003	0.58115	0.263002	0.0774103	0.269468	0.0701433
VAMP4	-0.205783	0.170059	-0.246603	0.0985057	0.0730872	0.629305	0.281141	0.0583999	0.117428	0.437034	-0.48443	0.000646223	-0.0171321	0.910026	-0.098406	0.515281	-0.276151	0.0632102	0.0747037	0.621722	-0.229537	0.124901
MSH4	-0.164012	0.276082	-0.246534	0.0986032	-0.00373535	0.980344	-0.206349	0.168861	0.181082	0.228457	-0.205157	0.17139	-0.133589	0.37611	0.126716	0.401377	-0.201612	0.179074	-0.229743	0.124553	-0.156908	0.297697
MAP6D1	0.161769	0.28279	-0.246191	0.0990875	0.0539032	0.722	-0.229867	0.124344	0.221964	0.138189	-0.0774054	0.609135	-0.0932961	0.537434	0.138401	0.359001	-0.0803213	0.595674	0.0793488	0.600149	-0.0907944	0.548445
NXPE3	-0.145166	0.335759	-0.246172	0.0991156	-0.101258	0.503119	0.139655	0.35462	-0.117874	0.435283	-0.148948	0.323184	0.0919011	0.543561	0.133795	0.375368	0.0735603	0.627081	0.237076	0.112651	0.0864804	0.567682
ATP6AP1L	0.215103	0.151111	0.246029	0.099318	-0.156067	0.300329	0.0398729	0.792479	-0.00549536	0.971086	-0.00631677	0.966767	-0.00460541	0.975767	0.0824295	0.586024	0.00438031	0.976951	0.0904359	0.550032	0.111565	0.460418
CMTR1	-0.173776	0.248097	-0.246001	0.0993567	0.324351	0.0278676	0.0459203	0.761863	0.0365953	0.809205	0.0315262	0.835238	-0.304413	0.0396952	0.0927888	0.539658	-0.311938	0.0348226	-0.298674	0.0437751	-0.0387948	0.797971
PPP1R19L	-0.105476	0.485406	0.24575	0.0997138	-0.249257	0.0948201	-0.190631	0.204436	0.173816	0.247986	-0.036383	0.810292	-0.0718909	0.634941	0.151769	0.313998	-0.0936538	0.535868	-0.174295	0.246665	0.135936	0.367705
KAT6B	-0.0962361	0.524632	0.245438	0.100158	-0.100913	0.504583	0.00180553	0.990498	-0.321669	0.0292631	0.18191	0.2263	-0.0550164	0.716496	0.102172	0.499254	-0.0369734	0.807271	-0.134367	0.373311	-0.0418428	0.782469
KIAA0196	0.0185373	0.90268	-0.245364	0.100264	0.299497	0.0431701	0.276791	0.0625766	-0.14341	0.341699	-0.188883	0.208694	-0.119283	0.429774	0.0449541	0.766732	0.0145735	0.92342	0.105747	0.48428	0.0223013	0.883045
LHFPL4	0.0777675	0.607456	-0.245354	0.100278	0.0309936	0.837984	0.278492	0.0609156	-0.319161	0.0306202	-0.0364798	0.809796	-0.018681	0.901929	0.206926	0.167647	0.0921326	0.542542	-0.0693983	0.64675	0.00190429	0.989979
PCGF2	-0.00662563	0.965143	0.24526	0.100413	-0.206113	0.16936	-0.0956429	0.527203	-0.110372	0.465262	-0.179401	0.232878	0.338045	0.0215768	-0.388236	0.0076725	0.109982	0.466847	0.208095	0.165206	-0.0472864	0.754995
CYBC1	0.0327018	0.829184	0.245257	0.100418	-0.23323	0.118781	-0.172654	0.251212	0.173464	0.248959	-0.0433294	0.774939	0.150016	0.319686	0.0593368	0.695271	-0.082914	0.583816	-0.0733349	0.62814	0.224043	0.13444
RWDD4	0.104992	0.487421	0.245208	0.100488	-0.453579	0.0015464	0.205825	0.16997	0.124556	0.409513	0.139542	0.355014	0.205065	0.171586	-0.136749	0.364821	0.352008	0.0164366	0.130261	0.388222	-0.105496	0.485322
HSPE1	0.00895512	0.952899	0.245142	0.100582	-0.238333	0.110701	-0.0412591	0.785432	-0.214506	0.152277	-0.0626197	0.679295	0.79144	5.85327e-11	-0.605136	8.39315e-06	0.431904	0.00272448	0.474449	0.000864693	0.0355978	0.814313
DBF4	0.27177	0.0676905	0.245062	0.100696	0.325879	0.0270974	-0.199149	0.184556	-0.206216	0.169142	0.121706	0.420396	0.258477	0.0828404	-0.179566	0.23244	0.124639	0.409201	0.107853	0.475566	0.21006	0.16116
SUOX	0.183877	0.221234	0.244843	0.10101	0.138521	0.35858	-0.140858	0.350447	-0.209666	0.161966	-0.0187288	0.901679	0.0871865	0.564512	-0.0281206	0.852828	0.059553	0.694215	0.0150168	0.921097	-0.0547619	0.717753
LOC101751538	-0.0635243	0.674917	0.244744	0.101153	0.125243	0.406914	-0.0926805	0.540133	0.004911	0.97416	-0.060137	0.691365	-0.122957	0.415599	0.151018	0.316428	-0.125269	0.406818	0.129601	0.390654	0.255493	0.0865806
SNX11	-0.0386771	0.798571	0.244672	0.101257	-0.0608808	0.68774	-0.151464	0.314982	-0.211027	0.159198	0.105169	0.486684	0.39983	0.00590487	-0.365609	0.012468	0.135636	0.368774	0.211855	0.157529	-0.0501638	0.740589
C1orf35	0.0439233	0.771936	0.244671	0.101258	-0.0868235	0.56614	0.0991121	0.512257	0.185447	0.217245	-0.0397211	0.793252	0.37353	0.0105585	-0.428672	0.00295533	0.0284724	0.851008	0.129053	0.392677	0.164684	0.274091
ANKRD52	-0.177871	0.236951	0.244646	0.101294	-0.296897	0.0451058	0.363588	0.013	0.105717	0.484405	-0.174894	0.245021	-0.178057	0.236456	0.104725	0.488534	0.084776	0.575367	-0.0479603	0.751613	0.0066084	0.965233
RLIM	-0.166411	0.26902	-0.244622	0.101328	0.181215	0.22811	-0.0847197	0.575621	-0.203436	0.17509	-0.145791	0.33366	-0.196124	0.19145	0.297614	0.0445652	-0.117681	0.43604	-0.165969	0.270312	0.109014	0.470803
FYTTD1	0.0746972	0.621752	-0.244537	0.10145	0.0576057	0.703749	-0.162817	0.279644	0.26481	0.0753217	-0.34952	0.0172678	-0.169269	0.260767	0.222315	0.13755	-0.0671498	0.657477	-0.201459	0.179411	-0.0746346	0.622045
TTC26	0.286027	0.0539782	0.244492	0.101516	0.25771	0.0837891	-0.0433575	0.774796	-0.158907	0.291507	-0.134727	0.37202	0.122155	0.418671	-0.0210114	0.889766	0.18156	0.227209	0.0373135	0.805533	-0.0842053	0.577951
MTF2	0.061862	0.68297	-0.244323	0.10176	0.165233	0.272472	-0.0760664	0.615359	-0.0418785	0.782288	-0.0829423	0.583687	0.0233591	0.877539	0.115831	0.443336	0.179641	0.232242	0.00594868	0.968702	-0.151976	0.313332
SEH1L	0.0535708	0.723646	0.2443	0.101793	0.24305	0.103612	0.119518	0.428862	0.168893	0.261842	-0.26712	0.0727166	0.0326035	0.82969	-0.314272	0.0334153	-0.168059	0.264239	-0.114062	0.450379	-0.151727	0.314135
PRMT9	-0.0532633	0.72517	0.24423	0.101894	-0.100666	0.505632	-0.0666689	0.65978	-0.0770753	0.610667	-0.0349526	0.81762	0.326785	0.0266493	-0.285093	0.0548014	0.0918616	0.543735	0.170527	0.257189	-0.0471404	0.755728
TMEM98	0.117892	0.435213	0.24409	0.102097	-0.000193937	0.998979	0.00743291	0.960899	-0.0652373	0.666655	0.0147118	0.922695	0.354933	0.0155031	-0.190068	0.2058	0.0623189	0.680753	-0.0501692	0.740562	0.110668	0.464058
ATXN3	0.0942133	0.533424	-0.244086	0.102103	0.0277708	0.854639	-0.134284	0.373608	0.180668	0.229539	0.464187	0.00115605	-0.347258	0.0180541	0.308274	0.0371296	-0.00869859	0.954247	-0.287433	0.0527565	-0.00338745	0.982175
PLEKHA6	0.237622	0.111801	0.244027	0.102188	-0.151701	0.314219	-0.108815	0.471619	-0.0874725	0.56323	-0.0731275	0.629115	0.273842	0.0655412	0.00957837	0.949625	0.208031	0.165338	0.239955	0.108223	0.310586	0.0356598
CAMK2D	-0.0484389	0.749215	-0.243652	0.102733	-0.181195	0.22816	0.503257	0.000363997	-0.28507	0.0548217	-0.1939	0.196637	-0.0932228	0.537755	0.178104	0.236329	0.147751	0.327131	-0.206689	0.168146	-0.0865322	0.567449
VPS13C	-0.280745	0.0587701	-0.24362	0.10278	-0.110531	0.464615	0.0609428	0.687439	0.353827	0.0158507	-0.334986	0.022867	-0.408892	0.0047813	0.410815	0.00456846	-0.328712	0.0257166	-0.16049	0.286665	0.0992005	0.511879
ENPP1	-0.0881907	0.560018	0.243536	0.102902	-0.248641	0.0956656	0.23796	0.111277	-0.23338	0.118538	-0.0544872	0.719111	-0.0587225	0.698276	-0.0906086	0.549267	-0.0786906	0.603185	-0.034212	0.821422	-0.282237	0.0573834
EIF4G2	0.0860303	0.569706	-0.243456	0.103019	0.118887	0.43132	0.0809173	0.592939	0.247541	0.0971911	-0.0755017	0.617992	-0.437752	0.00234687	0.446338	0.00187618	-0.180728	0.229381	-0.251215	0.0921696	-0.123294	0.414311
STRN3	-0.268321	0.0713916	-0.243324	0.103211	-0.153733	0.307703	0.375274	0.0101737	0.269096	0.0705463	-0.110401	0.465143	-0.439596	0.00223777	0.278516	0.0608927	-0.183205	0.222956	-0.256836	0.0848811	-0.0401576	0.79103
RAB9A	0.119536	0.428789	-0.243116	0.103516	0.444558	0.0019662	-0.191699	0.201863	-0.106422	0.481479	-0.141966	0.346633	-0.184243	0.220298	0.236271	0.113914	-0.248543	0.0958014	-0.277365	0.0620122	-0.0203079	0.893436
ARHGEF16	-0.080572	0.594523	0.243082	0.103565	-0.0226593	0.881181	-0.0517944	0.732465	-0.0559305	0.711987	0.00650448	0.96578	0.11003	0.46665	-0.0684867	0.65109	0.0839302	0.579198	0.111389	0.46113	0.271151	0.0683431
SLC44A5	-0.0241638	0.873354	-0.242722	0.104093	0.137214	0.363175	-0.0598901	0.692569	0.21148	0.158282	0.0117252	0.938354	-0.254792	0.087477	0.164942	0.273331	-0.106748	0.48013	-0.00414736	0.978177	-0.00607847	0.96802
TLN2	-0.0633408	0.675804	0.242682	0.104152	0.193444	0.19771	0.337251	0.0219055	-0.24073	0.107054	-0.249701	0.0942137	0.0499187	0.741813	-0.155403	0.302415	-0.0228794	0.880035	0.0636367	0.674373	0.210079	0.161123
HSD17B4	0.150295	0.318778	0.242572	0.104314	-0.0820805	0.587617	-0.181086	0.228445	-0.0659798	0.663086	-0.0988293	0.513467	0.322768	0.0286841	0.035475	0.814942	0.429571	0.00288948	0.306572	0.038243	0.282922	0.0567556
LOC112533350	0.0474876	0.753985	0.242492	0.104432	-0.0926896	0.540093	-0.087203	0.564438	-0.0896652	0.55345	-0.0348327	0.818235	0.381049	0.00898391	-0.248534	0.0958136	0.147832	0.326862	0.869974	4.21048e-15	0.0922793	0.541896
LOC101750931	0.236478	0.113589	0.242435	0.104515	-0.0411062	0.786208	0.447826	0.00180372	-0.0741846	0.624153	-0.0598127	0.692947	-0.179739	0.231984	0.161813	0.282657	0.0624134	0.680295	0.208676	0.164003	0.0557888	0.712685
FEZ2	-0.0638203	0.673487	0.242386	0.104589	0.118637	0.432297	0.210725	0.159808	-0.0643702	0.670832	-0.183012	0.223452	0.196451	0.190696	-0.349829	0.0171628	0.0319533	0.833038	0.276475	0.062889	-0.0860749	0.569506
FBXW7	0.385731	0.00810941	0.242276	0.10475	0.257518	0.0840277	-0.116026	0.442563	-0.22392	0.134661	-0.0254164	0.866846	-0.0245171	0.871517	0.251496	0.0917944	-0.291378	0.0494488	-0.0698191	0.64475	-0.00862138	0.954653
CEP250	-0.0858499	0.570519	0.242273	0.104755	-0.335143	0.0227992	-0.0821834	0.587147	0.243071	0.103581	0.284869	0.0550004	0.105951	0.48343	-0.189403	0.207422	0.188317	0.210088	0.0849985	0.574361	0.372816	0.0107197
MRPL35	0.115088	0.446286	0.242172	0.104904	-0.0653374	0.666173	-0.0315586	0.835071	-0.196104	0.191497	-0.0968096	0.522153	0.621319	4.07024e-06	-0.474611	0.000860661	0.282475	0.0571646	0.437069	0.00238842	0.115263	0.445592
SRSF3	0.0726649	0.631292	0.242093	0.105022	-0.0403686	0.789957	-0.113947	0.450836	-0.0523896	0.729506	0.0744424	0.622945	0.729595	8.82696e-09	-0.680585	1.95194e-07	0.288532	0.0518181	0.343845	0.0192978	0.0382486	0.800757
PDZD3	0.0881291	0.560293	0.242086	0.105032	-0.135542	0.369108	0.00289009	0.984792	0.00373945	0.980323	-0.150723	0.317386	-0.0940066	0.534326	0.270075	0.0694889	-0.126187	0.403359	-0.0193576	0.898396	0.464611	0.00114248
NUBP1	0.0105253	0.944653	-0.241968	0.105206	-0.139053	0.356718	0.0568025	0.707695	-0.202044	0.178125	0.228258	0.127075	0.0653408	0.666157	0.0622442	0.681115	0.10102	0.504127	0.215819	0.149723	0.104884	0.487872
MEGF11	0.0998546	0.509086	0.241955	0.105225	-0.237675	0.111719	-0.166684	0.268224	0.249341	0.0947061	-0.167018	0.267252	0.519803	0.000213707	-0.239977	0.10819	-0.0593262	0.695323	0.250846	0.0926651	0.290053	0.0505408
SNRPD3	-0.0627587	0.678621	0.241908	0.105296	-0.16549	0.271717	-0.0924625	0.541091	0.258926	0.0822876	-0.167235	0.266624	0.230656	0.123023	-0.259171	0.0819885	0.026065	0.86348	0.164841	0.273627	-0.0281906	0.852466
KIF1A	-0.104376	0.489995	0.241751	0.105528	-0.0586681	0.698542	0.321041	0.0295981	0.13105	0.38533	-0.14875	0.323834	-0.0761794	0.614833	0.0138031	0.927457	-0.018121	0.904856	0.057791	0.70284	0.198195	0.18671
NUCB2	0.240077	0.108038	0.241692	0.105617	-0.0381042	0.801494	0.0860045	0.569823	-0.13128	0.384491	0.106502	0.481144	0.0150622	0.92086	-0.0260636	0.863488	0.0839882	0.578935	0.106385	0.481631	-0.00275755	0.985489
SLIRP	0.152583	0.31138	0.241688	0.105622	-0.187183	0.212895	0.00428753	0.977439	-0.273582	0.065808	-0.0543018	0.720028	0.738777	4.58469e-09	-0.426872	0.00309132	0.299725	0.0430031	0.354304	0.0157001	0.118794	0.431681
CDH8	-0.44972	0.00171506	-0.241647	0.105683	-0.0460917	0.761	0.356573	0.0149995	0.266492	0.073418	-0.298781	0.0436957	-0.184768	0.218964	-0.036525	0.809565	-0.0335223	0.824964	-0.221094	0.139781	-0.0917142	0.544384
TMEFF1	0.0511541	0.735652	-0.241627	0.105713	-0.0899356	0.552249	-0.280912	0.0586136	0.253709	0.0888786	-0.107833	0.47565	-0.177722	0.237351	0.228612	0.12647	-0.0250504	0.868747	-0.0517277	0.732797	-0.25733	0.0842624
GAMT	0.172699	0.251086	0.241622	0.10572	0.112107	0.458231	-0.109731	0.467873	-0.0556349	0.713444	-0.0712528	0.637956	0.00943455	0.950381	-0.0232356	0.878182	0.294601	0.0468729	-0.020085	0.894599	-0.235935	0.114445
GAPVD1	0.10161	0.501629	0.241582	0.10578	0.056977	0.706837	-0.082824	0.584226	0.306645	0.0381946	-0.150471	0.318203	0.338835	0.0212536	-0.286936	0.0531855	-0.10571	0.48443	0.293173	0.0480011	0.168824	0.26204
PRDX3	0.172581	0.251414	-0.24148	0.105932	-0.176766	0.239925	0.274315	0.0650585	-0.189428	0.207361	0.109198	0.470049	0.265702	0.0743071	-0.0797652	0.598231	0.141639	0.347756	0.240903	0.106794	0.127717	0.397636
UBA3	-0.162978	0.279162	-0.241353	0.106121	-0.117704	0.435951	0.48098	0.000715384	0.302886	0.0407487	-0.120129	0.426488	-0.528251	0.000161095	0.363735	0.0129608	-0.00330577	0.982604	-0.185194	0.217886	-0.0992759	0.511556
ATP6V0A1	0.275115	0.0642482	-0.241292	0.106213	0.182913	0.223707	-0.0293945	0.84624	-0.104795	0.488242	0.293074	0.0480801	-0.120414	0.425381	0.0225367	0.881819	0.020823	0.890749	-0.0744325	0.622991	-0.238787	0.110003
CREBZF	-0.0307037	0.839479	0.241285	0.106222	-0.194868	0.194368	-0.146932	0.329849	0.0946632	0.531462	0.117549	0.43656	0.262352	0.0781726	-0.283993	0.0557842	-0.0194085	0.89813	0.176238	0.241356	0.350411	0.016966
DISP3	-0.140781	0.350714	-0.241224	0.106314	-0.221454	0.13912	0.260168	0.0807777	0.241199	0.106351	0.164376	0.275	-0.531236	0.000145524	0.374298	0.0103877	-0.265138	0.0749476	-0.248297	0.0961413	-0.0109066	0.942651
LOC107053464	-0.121417	0.421507	0.241106	0.106491	0.199592	0.183561	0.0306194	0.839914	-0.084161	0.578152	-0.0284828	0.850954	0.307423	0.0376829	-0.450854	0.00166388	0.170351	0.257687	0.115045	0.446457	0.22384	0.134804
DENND6B	0.302429	0.0410688	0.241052	0.106572	-0.0561104	0.711101	-0.108728	0.471975	-0.110915	0.463052	0.242086	0.105031	0.371358	0.0110554	-0.204185	0.173473	0.157534	0.295751	0.4083	0.00484855	0.164057	0.275947
BTBD6	-0.0430336	0.776436	-0.240948	0.106727	0.51125	0.000282382	-0.0556284	0.713476	-0.102463	0.498025	-0.0985884	0.514499	-0.0122242	0.935737	-0.0683471	0.651756	-0.249881	0.09397	-0.0633843	0.675594	0.0760024	0.615657
BLOC1S2	-0.245938	0.0994474	-0.240758	0.107012	0.102011	0.499934	-0.0690977	0.64818	0.129936	0.389417	0.186676	0.21416	-0.0721337	0.633795	-0.0798907	0.597653	0.181544	0.22725	0.029613	0.845111	0.026435	0.861561
IP6K2	-0.142672	0.344216	-0.240696	0.107106	0.330315	0.0249619	0.134292	0.37358	0.129142	0.392346	-0.22013	0.141561	-0.148889	0.323376	-0.0367413	0.808458	-0.298977	0.0435518	-0.393066	0.0068871	-0.413573	0.00427765
MCFD2	0.11241	0.457009	0.240489	0.107417	-0.0515658	0.733602	0.0274472	0.856315	-0.130086	0.388867	0.0452157	0.765412	0.182452	0.224896	-0.287089	0.0530535	0.0292731	0.846867	0.0596718	0.693635	-0.448474	0.00177293
MACF1	0.11503	0.446518	-0.240431	0.107503	0.0745535	0.622425	0.350957	0.0167835	-0.268582	0.0711059	0.420488	0.00361874	-0.328877	0.0256381	0.315457	0.0327194	0.0101807	0.946462	-0.200125	0.182368	-0.085029	0.574223
PROSC	-0.0390258	0.796793	0.240395	0.107558	-0.424622	0.00326888	-0.115123	0.446148	-0.152658	0.311138	-0.131315	0.384364	0.475232	0.000845432	-0.282404	0.0572293	0.13535	0.369791	0.364545	0.0127459	0.0673434	0.656551
SERTAD2	-0.156978	0.297479	-0.240381	0.107579	-0.306415	0.0383471	0.176612	0.240343	0.124598	0.409354	-0.120627	0.424556	-0.0760499	0.615436	0.19939	0.184013	0.24901	0.0951586	0.166931	0.267505	-0.0141539	0.925618
MYO6	-0.0811193	0.592013	-0.240249	0.107779	-0.0325725	0.829849	-0.162268	0.28129	0.266151	0.0738003	0.014351	0.924585	-0.162995	0.279111	0.103299	0.494509	-0.0462325	0.760292	-0.155872	0.30094	-0.0271761	0.85772
BEND6	-0.0502764	0.740027	-0.240163	0.107909	-0.0316964	0.834361	-0.172252	0.252334	-0.0603764	0.690197	0.272721	0.0666966	-0.282135	0.0574774	0.391993	0.0070552	-0.179958	0.231406	-0.149981	0.319801	0.178895	0.234221
TMEM108	0.0458568	0.762183	0.240053	0.108075	-0.123838	0.412241	-0.111468	0.460812	-0.14472	0.337262	0.172716	0.251039	-0.0864802	0.567683	0.297959	0.0443062	0.28621	0.0538178	-0.158114	0.293955	0.107236	0.478113
ATRN	0.211377	0.15849	-0.239914	0.108285	0.0159177	0.91638	-0.0719078	0.634861	0.0896403	0.553561	0.161155	0.284648	-0.493637	0.000490072	0.566137	4.11766e-05	-0.0537775	0.722622	-0.351082	0.0167418	-0.229376	0.125173
TNS3	0.0663075	0.661513	-0.239864	0.108361	-0.0724932	0.632101	0.348278	0.0176957	0.306754	0.0381229	-0.128316	0.395407	-0.424658	0.00326597	0.30743	0.037678	-0.0117236	0.938363	-0.106299	0.481987	-0.0343214	0.82086
SPTB	0.0787399	0.602958	-0.239718	0.108583	0.0232361	0.878179	0.024048	0.873956	-0.289798	0.050753	0.239053	0.109597	-0.0530253	0.72635	0.0376077	0.804029	0.0593301	0.695304	0.00533076	0.971952	-0.198344	0.186373
WSCD1	0.00744601	0.96083	0.239679	0.108642	-0.144135	0.33924	-0.321541	0.0293308	-0.0360754	0.811866	0.284294	0.0555145	0.411	0.00454836	-0.169317	0.260628	0.115064	0.446382	0.0446854	0.768087	0.509257	0.000301015
MKS1	0.028796	0.849334	0.239662	0.108667	-0.121455	0.421364	-0.0872319	0.564308	-0.0892586	0.555257	-0.0270313	0.85847	0.429163	0.0029192	-0.143973	0.339786	0.4114	0.00450533	0.171576	0.254228	0.321538	0.0293323
TIAM1	-0.0194919	0.897694	-0.239572	0.108804	0.303012	0.0406607	0.178039	0.236503	0.164308	0.275204	0.136514	0.365653	-0.395575	0.00650734	0.28101	0.0585221	0.153352	0.308919	-0.306013	0.038615	-0.0414699	0.784361
LOC107053298	-0.0436364	0.773386	0.239526	0.108875	-0.193348	0.197937	-0.157595	0.295563	-0.130586	0.38703	0.185209	0.217847	0.544813	9.05363e-05	-0.492975	0.000500052	0.138047	0.360242	0.341735	0.0201019	0.330656	0.0248036
KIAA1210	0.128717	0.393919	-0.239482	0.108941	0.127231	0.39945	-0.034201	0.821478	0.125207	0.40705	-0.0292976	0.84674	-0.574969	2.9235e-05	0.654683	7.98784e-07	-0.480308	0.000729593	-0.140597	0.35135	0.105518	0.485231
DFNA5	0.213747	0.153768	0.239452	0.108987	-0.168952	0.261672	-0.122125	0.418787	-0.126038	0.40392	-0.143427	0.341642	0.0611361	0.686498	0.149677	0.320792	0.293199	0.04798	0.209785	0.161723	0.0443092	0.769987
MKRN2	0.216098	0.149185	0.239289	0.109236	-0.143925	0.339951	-0.0871002	0.564899	-0.0621976	0.681341	-0.0244919	0.871648	0.278798	0.0606204	-0.0143167	0.924765	-0.0274467	0.856318	0.219934	0.141925	0.378282	0.0095382
CARNMT1	0.0333828	0.825682	0.239266	0.109271	-0.375293	0.0101696	-0.227536	0.128315	0.0690055	0.648619	0.24674	0.0983133	0.425088	0.00323141	-0.308788	0.0367982	0.175402	0.24363	0.08777	0.561899	0.236989	0.112787
TAGLN3	0.0107064	0.943702	0.239164	0.109426	-0.102558	0.497627	-0.0476277	0.753282	0.0828485	0.584115	-0.153756	0.307631	0.521124	0.000204568	-0.379153	0.00936071	0.0209751	0.889956	0.454737	0.0014987	0.428686	0.00295435
SLC7A6	-0.201601	0.179099	0.239154	0.109441	-0.101109	0.50375	0.041912	0.782118	-0.0681174	0.652852	0.0452566	0.765206	0.200943	0.18055	-0.132646	0.379518	0.0979956	0.517043	0.176638	0.240271	0.281086	0.0584511
ETNK1	0.151135	0.316047	-0.238716	0.110113	0.22642	0.130249	0.0204033	0.892938	-0.16254	0.280472	0.118774	0.431761	-0.540153	0.000106798	0.4492	0.001739	-0.251547	0.0917269	-0.140093	0.353097	-0.113637	0.452081
CNTN4	-0.28839	0.0519382	-0.238669	0.110184	-0.130034	0.389059	0.304682	0.0395113	-0.045035	0.766324	-0.0625219	0.679769	-0.278315	0.0610866	0.157943	0.294481	0.0201463	0.894279	-0.131443	0.383896	-0.418286	0.00381813
SFMBT1	0.0459542	0.761692	0.238577	0.110327	-0.153642	0.307992	-0.0760476	0.615447	-0.0980259	0.516913	-0.0874934	0.563137	0.310733	0.0355674	-0.138476	0.358737	0.276319	0.063043	-0.0256542	0.865612	-0.019964	0.89523
LOC107054308	-0.0671088	0.657673	-0.238565	0.110345	-0.162164	0.281601	-0.130647	0.386805	-0.0348812	0.817987	0.297602	0.044574	-0.181471	0.227442	0.201037	0.180344	0.30882	0.0367779	-0.276138	0.0632238	-0.125925	0.404344
TTLL7	0.0932747	0.537528	-0.238556	0.110358	0.232168	0.120518	-0.157448	0.296018	-0.199839	0.183008	0.161524	0.283531	-0.326272	0.0269025	0.364825	0.0126724	-0.142427	0.345054	-0.253971	0.0885373	-0.196578	0.190403
ACYP2	0.121975	0.419363	0.238422	0.110564	-0.186075	0.215666	-0.0351918	0.816394	-0.282615	0.0570359	-0.189841	0.206352	0.502625	0.000371276	-0.35695	0.0148858	0.214845	0.151614	0.250394	0.093274	0.0974175	0.519531
ING1	-0.0456968	0.762988	0.238409	0.110584	0.107903	0.475361	-0.0888246	0.55719	-0.0502932	0.739944	-0.00348596	0.981656	0.35165	0.0165541	-0.392582	0.00696248	0.0620064	0.682269	0.249905	0.0939375	0.384877	0.00826314
CIPC	-0.141926	0.346772	-0.238212	0.110888	0.00540697	0.971551	0.326893	0.0265963	0.127452	0.398623	0.404739	0.00527057	-0.22258	0.137071	0.0261967	0.862797	-0.0833451	0.581855	-0.0512524	0.735162	0.159304	0.290288
TCF20	0.0838322	0.579643	0.238139	0.111001	0.0872315	0.56431	-0.157924	0.294541	-0.163051	0.278943	-0.148001	0.326303	-0.0426307	0.778476	0.0428844	0.777191	0.0597515	0.693246	0.0232079	0.878326	-0.127618	0.398005
RSF1	0.128176	0.395927	-0.238125	0.111023	0.260757	0.0800687	0.176156	0.241577	-0.122482	0.417417	-0.119469	0.429052	-0.391332	0.00716062	0.341688	0.0201205	-0.267608	0.072176	-0.234529	0.116684	-0.0664188	0.660979
ESYT2	-0.107161	0.478419	-0.237945	0.1113	-0.103408	0.494051	0.0801468	0.596476	-0.0990396	0.512567	-0.133649	0.375895	-0.066647	0.659885	0.358726	0.01436	0.0339577	0.822728	0.132792	0.378991	0.359193	0.0142242
PEX11A	-0.0488838	0.746987	0.237648	0.111761	-0.211117	0.159016	-0.247195	0.0976746	0.353629	0.0159135	-0.143205	0.342396	0.0500551	0.741132	0.0706097	0.641	0.00989654	0.947954	0.124757	0.408751	0.173904	0.247743
ORAI1	0.0040536	0.97867	0.237409	0.112133	-0.166173	0.269716	-0.136142	0.366972	-0.143138	0.342626	-0.116291	0.441516	0.508415	0.000309213	-0.419323	0.00372309	0.419235	0.00373106	0.204114	0.173626	-0.0374593	0.804788
HAPLN2	0.50726	0.000320788	0.237342	0.112237	0.305016	0.039285	-0.257981	0.0834529	-0.0349575	0.817596	-0.0192964	0.898715	0.0546819	0.718148	0.0581053	0.701298	-0.162034	0.281993	-0.0645477	0.669976	0.0237615	0.875446
GRIK2	-0.00054508	0.997131	-0.237233	0.112407	0.110709	0.46389	-0.0873597	0.563736	0.0370954	0.806647	-0.0791013	0.60129	-0.223269	0.135828	0.11283	0.455318	-0.192036	0.201057	-0.109949	0.466982	-0.172578	0.251424
DYNC1LI2	-0.0315852	0.834934	0.2372	0.112459	-0.355581	0.0153024	0.109969	0.4669	0.0685617	0.650733	-0.238441	0.110535	-0.05291	0.726922	0.153147	0.309574	-0.0213352	0.888078	0.299631	0.043072	0.0392681	0.795558
ILDR2	-0.0873993	0.563558	0.23716	0.112521	-0.102019	0.499898	-0.133087	0.377924	0.171329	0.254922	0.0771194	0.610462	0.288496	0.0518488	-0.312334	0.0345805	0.0584936	0.699396	0.227548	0.128294	0.199482	0.183808
RGS4	0.00673863	0.964549	0.237114	0.112593	0.120263	0.425967	-0.226075	0.130851	-0.0457893	0.762522	-0.144545	0.337851	0.256034	0.0858929	-0.0219904	0.884664	0.0966413	0.522879	0.149241	0.322222	0.276419	0.0629443
CEP135	0.0784547	0.604276	-0.237024	0.112732	0.474066	0.000874253	0.353269	0.0160283	-0.170348	0.257696	-0.0956247	0.527282	-0.198955	0.184991	0.0853635	0.572712	-0.165417	0.271932	-0.267123	0.0727132	-0.201127	0.180143
GNG11	0.172381	0.251972	0.236997	0.112775	0.202373	0.177403	-0.208367	0.164643	0.094452	0.532382	-0.12962	0.390584	0.0752131	0.61934	-0.13496	0.371188	0.0616774	0.683867	-0.13569	0.36858	-0.163436	0.277795
ADGRA1	-0.100284	0.507255	-0.236877	0.112964	0.0665706	0.660251	-0.191047	0.20343	0.11683	0.439388	-0.11262	0.456161	-0.505413	0.000340118	0.595344	1.27602e-05	-0.121171	0.422455	-0.112506	0.45662	-0.066127	0.662379
SLTM	-0.0647213	0.669139	0.236856	0.112995	-0.106293	0.482014	-0.0811453	0.591894	-0.156838	0.297916	0.190912	0.203756	0.024019	0.874107	-0.00910007	0.952138	0.276291	0.063071	-0.132453	0.38022	0.0881502	0.560199
C7orf25	-0.0184719	0.903022	-0.236799	0.113085	0.449516	0.00172442	0.128762	0.393752	-0.250465	0.0931778	0.11712	0.438247	-0.159435	0.289888	-0.0712645	0.6379	-0.169238	0.260854	-0.0884272	0.558962	-0.1394	0.355506
TMEM186	0.129483	0.391089	-0.236749	0.113163	0.327558	0.0262718	0.383842	0.00845297	0.0206567	0.891616	-0.393962	0.0067494	-0.448763	0.00175937	0.359223	0.0142155	-0.231521	0.121584	-0.234864	0.116148	-0.297126	0.044932
CCDC92	-0.0261275	0.863156	-0.236559	0.113462	-0.00408619	0.978499	-0.0828091	0.584294	-0.124227	0.410763	-0.290505	0.0501664	-0.0342078	0.821443	0.358293	0.0144867	-0.248543	0.0958014	-0.015891	0.91652	-0.0596149	0.693913
CYB5R1	-0.224051	0.134426	0.236469	0.113603	-0.267893	0.0718615	-0.0619085	0.682744	-0.0133697	0.929729	0.0879999	0.560871	0.452943	0.00157313	-0.415904	0.00404466	0.325923	0.0270754	0.337831	0.0216648	0.0422528	0.78039
PLCD4	0.0186578	0.90205	0.236319	0.113839	-0.180888	0.228962	0.091322	0.546114	-0.114835	0.447293	-0.0814707	0.590404	0.0608177	0.688047	0.153368	0.308868	-0.12227	0.418231	0.0671736	0.657363	0.518926	0.000219972
EMC2	0.05767	0.703434	0.236238	0.113967	-0.204393	0.173026	-0.143845	0.340223	0.110364	0.465292	-0.190003	0.205959	0.343352	0.0194832	-0.274277	0.0650972	0.101048	0.50401	0.131644	0.38316	0.293461	0.0477714
AFTPH	-0.0845643	0.576325	-0.236133	0.114132	0.510252	0.000291584	-0.129856	0.389713	-0.0827664	0.584489	-0.142136	0.34605	-0.0739829	0.625098	-0.0391406	0.796208	-0.115998	0.442674	-0.0894257	0.554514	-6.26929e-05	0.99967
SGK1	-0.118719	0.431973	-0.236089	0.114202	0.303384	0.040403	0.415162	0.00411757	0.0595446	0.694256	0.201477	0.179371	-0.442873	0.00205494	0.0800297	0.597014	-0.119422	0.429233	-0.425737	0.00317982	-0.164205	0.275507
LIN7A	0.00622407	0.967254	0.236005	0.114334	-0.232572	0.119855	0.180207	0.230749	-0.167583	0.265615	0.100203	0.507601	0.184927	0.21856	-0.0520588	0.73115	0.247287	0.0975458	0.283426	0.0562973	0.236055	0.114254
ZNF740	0.099609	0.510133	-0.235895	0.114508	0.513344	0.000263939	0.0942244	0.533375	-0.247743	0.0969101	-0.239449	0.108992	-0.249122	0.0950058	0.143275	0.342158	-0.157387	0.296207	0.0285137	0.850794	-0.0373458	0.805367
LPP	0.102165	0.499283	0.235864	0.114557	-0.233969	0.117584	-0.00290446	0.984716	-0.000733213	0.996141	0.226981	0.129274	-0.0710931	0.638711	-0.0112477	0.94086	-0.193954	0.196509	0.179141	0.233567	0.139784	0.354172
ASH1L	0.148803	0.323659	0.235857	0.114568	-0.0836565	0.58044	-0.160285	0.28729	-0.0908938	0.548005	0.392604	0.00695904	0.0198433	0.89586	0.0311555	0.837149	0.0787098	0.603097	0.0243504	0.872384	0.461691	0.00123898
ZFHX3	-0.169683	0.259586	-0.235853	0.114574	-0.0510024	0.736407	-0.0645939	0.669753	0.0357513	0.813526	0.0354102	0.815274	0.0894546	0.554386	-0.139686	0.354511	-0.17769	0.237438	0.0606165	0.689027	0.345843	0.0185611
LOC121110148	-0.0298971	0.843643	0.235807	0.114648	-0.0874225	0.563454	0.25914	0.0820268	-0.0689516	0.648876	-0.0979242	0.51735	0.276882	0.062487	-0.423208	0.00338509	0.0162749	0.91451	0.411509	0.00449365	-0.0383493	0.800243
FRYL	-0.20606	0.169472	-0.235727	0.114774	0.104263	0.490464	-0.14192	0.346789	0.359988	0.0139958	-0.122151	0.418685	-0.234361	0.116953	0.114485	0.44869	-0.51301	0.000266804	-0.096062	0.525386	-0.0592857	0.695521
LUM	0.0842496	0.57775	-0.235719	0.114787	0.337812	0.0216726	-0.186135	0.215515	-0.178533	0.235183	0.424956	0.00324198	-0.395784	0.00647663	0.338885	0.0212332	-0.210116	0.161047	-0.23119	0.122134	-0.0342552	0.8212
DHX57	-0.0833491	0.581837	-0.235671	0.114863	0.132618	0.37962	0.0945151	0.532107	-0.347397	0.0180051	-0.0486769	0.748023	0.0266335	0.860532	0.00859705	0.954781	0.169834	0.259156	-0.225581	0.131718	-0.261629	0.0790278
ZMYND11	0.162758	0.279818	0.235652	0.114892	0.192192	0.200685	-0.0875034	0.563092	-0.166924	0.267526	-0.181535	0.227274	-0.191137	0.203215	0.22052	0.140838	-0.344001	0.0192394	0.0146228	0.923161	0.268091	0.0716436
CERS1	-0.216958	0.147533	-0.235471	0.11518	0.0188079	0.901266	-0.167655	0.265407	0.0226691	0.88113	0.109385	0.469286	0.0488252	0.74728	-0.198035	0.187075	-0.0903864	0.550251	-0.221705	0.138661	-0.252383	0.0906174
PLXNA4	0.12955	0.39084	0.235422	0.115257	0.0064031	0.966313	-0.28304	0.0566476	-0.180546	0.22986	0.182612	0.224482	0.202134	0.177928	-0.0248554	0.86976	0.0265169	0.861137	0.16475	0.273896	0.339594	0.0209469
MANF	0.204426	0.172955	0.235313	0.115431	0.0729274	0.630056	-0.139093	0.356579	-0.247381	0.0974146	-0.111055	0.462487	0.623378	3.70123e-06	-0.505636	0.000337726	0.34378	0.0193222	0.310394	0.0357795	0.0106686	0.9439
MCC	-0.0418724	0.782319	-0.235287	0.115472	0.402554	0.00554522	-0.13769	0.361499	0.0623305	0.680697	-0.208942	0.163454	-0.368293	0.0117906	0.0315761	0.834981	-0.3277	0.0262029	-0.235763	0.114716	-0.293855	0.0474598
MRPL55	0.00892301	0.953068	0.235269	0.115501	0.0352948	0.815866	-0.241401	0.10605	-0.0646144	0.669655	-0.124361	0.410251	0.511131	0.000283471	-0.412091	0.00443184	0.161496	0.283616	0.0542209	0.720428	0.208154	0.165084
LOC425137	-0.152359	0.312098	0.23504	0.115866	-0.108652	0.472286	0.0911418	0.546909	-0.135061	0.370824	-0.0936613	0.535835	0.411865	0.00445575	-0.326979	0.026554	0.0968924	0.521795	0.267236	0.0725875	0.371449	0.0110342
CCDC169	0.0453535	0.764718	0.234917	0.116063	-0.0879897	0.560916	0.179709	0.232064	-0.226819	0.129555	0.335063	0.0228337	0.0196832	0.896696	-0.0196981	0.896618	0.0761587	0.614929	0.0391979	0.795916	-0.0901753	0.551186
NCOR1	-0.00349104	0.98163	-0.234854	0.116162	0.303621	0.0402387	0.0657238	0.664316	0.147755	0.327117	-0.0699922	0.643928	-0.342241	0.0199067	0.200339	0.181893	-0.269929	0.0696458	-0.177948	0.236747	0.0468682	0.757095
CEP70	0.0128985	0.9322	0.234715	0.116385	-0.231229	0.122068	0.101083	0.503863	0.301348	0.0418332	-0.148637	0.324206	0.292569	0.0484844	-0.312475	0.0344945	0.115928	0.442953	0.228495	0.12667	0.0935004	0.536539
FAM114A2	-0.220049	0.14171	-0.234579	0.116603	-0.164574	0.274415	-0.00380747	0.979965	0.211603	0.158037	-0.0158084	0.916952	-0.0791958	0.600854	-0.100384	0.506833	-0.326547	0.0267663	0.00657584	0.965405	0.101438	0.502359
NBR1	0.276116	0.0632455	-0.234579	0.116603	0.281771	0.0578133	-0.269444	0.0701691	-0.036579	0.809288	-0.171134	0.255472	-0.384744	0.00828746	0.502197	0.000376291	-0.153721	0.307742	0.00941097	0.950505	-0.178446	0.235416
PWWP2B	0.330135	0.0250458	0.234511	0.116712	-0.0999282	0.508772	-0.0516231	0.733317	-0.0860442	0.569644	-0.0140075	0.926385	0.393829	0.00676959	-0.135789	0.368226	-0.0360596	0.811947	0.135726	0.368451	0.220625	0.140644
NOL4L	-0.10068	0.505574	-0.234481	0.11676	-0.13683	0.364533	0.0548204	0.717464	0.167183	0.266775	-0.16489	0.273482	-0.18004	0.23119	0.100577	0.50601	-0.0175488	0.907847	-0.000731818	0.996149	-0.203725	0.174465
KIF1B	-0.0632169	0.676403	0.234477	0.116766	-0.0707118	0.640516	0.038354	0.800219	0.412051	0.0044361	-0.136004	0.367463	-0.183207	0.22295	0.0486963	0.747925	-0.201505	0.179309	0.183868	0.221257	0.361531	0.0135612
MPND	0.154121	0.306471	0.234353	0.116967	-0.320471	0.0299047	-0.237571	0.11188	0.356664	0.0149723	0.0460473	0.761224	0.120883	0.423568	-0.0574463	0.704531	0.0552504	0.715341	-0.0866178	0.567064	0.121697	0.42043
KIAA0232	0.0999786	0.508557	0.234352	0.116968	-0.413165	0.00431967	-0.0605821	0.689195	0.095524	0.527719	0.00507685	0.973287	0.222754	0.136756	0.147214	0.328912	0.0301196	0.842494	0.374709	0.010297	0.403428	0.00543395
TLE4	-0.160469	0.286728	-0.234229	0.117166	-0.22959	0.124812	-0.172533	0.251549	0.00680642	0.964192	-0.160054	0.287995	-0.306377	0.0383725	0.464767	0.00113751	0.0407206	0.788167	-0.122045	0.419092	-0.0276629	0.855198
PDHA2	0.00615272	0.967629	0.234218	0.117183	-0.258661	0.0826134	-0.168337	0.263438	0.00529357	0.972148	-0.0573471	0.705019	0.692474	9.73845e-08	-0.570269	3.51233e-05	0.264554	0.0756146	0.555597	6.11936e-05	0.250237	0.0934873
HIVEP1	0.099885	0.508956	-0.234155	0.117284	0.456419	0.00143179	-0.163696	0.277018	-0.0307875	0.839047	-0.156637	0.298545	-0.271517	0.067956	0.375368	0.0101534	-0.273451	0.0659426	-0.0594809	0.694567	0.229592	0.124809
TMEM169	0.189568	0.207018	-0.23412	0.11734	0.131811	0.382554	0.295838	0.0459141	-0.0754192	0.618378	0.221473	0.139086	-0.222816	0.136643	0.0762488	0.614509	0.181728	0.226773	-0.222277	0.13762	-0.185234	0.217783
GOLGB1	0.203063	0.175901	0.234069	0.117422	-0.333477	0.0235272	0.186574	0.214416	-0.214988	0.151336	-0.201372	0.179603	0.172427	0.251845	0.0728573	0.630386	0.323001	0.028563	0.0396371	0.793679	0.00459632	0.975815
RNF34	0.0703517	0.642223	0.23387	0.117744	-0.159928	0.288379	0.0176448	0.907345	-0.228446	0.126754	-0.184987	0.218408	0.433731	0.00260114	-0.299272	0.0433348	0.152643	0.311189	0.277971	0.0614204	-0.0140288	0.926274
GGA1	-0.152436	0.311851	-0.233817	0.11783	0.0193348	0.898515	0.311245	0.0352494	-0.276767	0.0626004	-0.119133	0.430361	0.184747	0.219018	-0.0687825	0.649681	0.237511	0.111974	-0.0254041	0.86691	-0.142129	0.346074
SECISBP2	0.00116719	0.993858	-0.233474	0.118386	0.0412155	0.785653	-0.344405	0.0190887	0.486039	0.000616068	-0.287774	0.0524642	0.0424216	0.779535	-0.0421082	0.781124	-0.115861	0.44322	0.180557	0.229832	0.109309	0.469597
ARFGAP3	-0.0585536	0.699102	-0.233426	0.118463	-0.143939	0.339904	0.00146267	0.992303	0.106491	0.48119	0.41916	0.00373784	-0.144915	0.336604	0.0749984	0.620343	0.128091	0.396244	0.00875486	0.953952	-0.0285829	0.850436
VPS13A	-0.00430808	0.977331	-0.233297	0.118672	0.192773	0.199301	0.19405	0.196283	-0.234023	0.117497	-0.088717	0.557669	-0.171199	0.255289	0.193273	0.198115	-0.295701	0.0460197	0.0606654	0.688789	-0.277414	0.0619642
PLTP	0.00669169	0.964795	-0.233295	0.118675	-0.0720554	0.634164	0.249182	0.0949235	0.0882959	0.559548	-0.0695217	0.646163	0.0603549	0.690302	-0.216325	0.148747	-0.00958535	0.949589	0.0439374	0.771865	-0.182723	0.224195
RNF5	-0.0123493	0.93508	0.232965	0.119213	-0.01645	0.913594	-0.232362	0.120199	0.271047	0.0684535	0.0134741	0.929181	0.148485	0.324707	-0.173538	0.248754	0.0127166	0.933154	0.122219	0.418426	0.27358	0.0658093
NXN	-0.0937191	0.535583	-0.232962	0.119217	0.166231	0.269546	-0.08574	0.571014	0.337588	0.0217654	-0.240635	0.107197	-0.148372	0.32508	-0.0511189	0.735827	-0.196983	0.189475	-0.171175	0.255358	-0.237987	0.111236
ATP8B4	-0.0516781	0.733043	-0.232897	0.119323	0.34651	0.0183206	-0.181607	0.227088	-0.161753	0.282839	-0.182404	0.22502	-0.0125489	0.934033	0.180595	0.229731	0.269233	0.0703971	-0.127094	0.399959	-0.0100862	0.946958
SLC5A11	0.128586	0.394404	0.23287	0.119367	-0.162893	0.279416	0.0590656	0.696597	0.0510853	0.735994	-0.0535797	0.723602	0.295525	0.0461549	-0.213575	0.154107	0.0397491	0.793109	0.285082	0.0548111	0.254593	0.087733
CCNL2	-0.0325136	0.830153	-0.232857	0.119389	-0.162959	0.279217	-0.134769	0.371872	-0.062857	0.678145	-0.136693	0.365017	-0.242169	0.104908	0.279936	0.0595334	-0.0724883	0.632124	-0.110128	0.466254	-0.439945	0.00221765
TAF7	0.109208	0.470007	-0.232828	0.119437	-0.151355	0.315337	-0.0736962	0.626443	-0.146278	0.332032	0.21187	0.1575	-0.149028	0.322919	0.368287	0.011792	0.102665	0.497173	-0.0101035	0.946867	0.331637	0.0243532
C2CD2	-0.0491755	0.745528	0.232818	0.119453	-0.101434	0.502375	0.0114659	0.939715	-0.100105	0.50802	-0.18887	0.208727	0.0468085	0.757395	0.110564	0.464478	0.0801727	0.596356	0.205695	0.170246	-0.0874681	0.56325
TRIM2	-0.320709	0.0297761	-0.232763	0.119542	-0.108298	0.473737	0.0910409	0.547355	0.206552	0.168434	-0.326269	0.026904	-0.303613	0.0402442	0.258305	0.0830526	-0.0818938	0.588469	-0.218857	0.143935	-0.351098	0.0167368
VOPP1	-0.0631118	0.676912	0.232762	0.119544	-0.200678	0.181139	-0.230804	0.122775	-0.020127	0.89438	0.384415	0.00834746	0.405527	0.0051746	-0.287703	0.0525251	0.15181	0.313867	0.165253	0.272414	0.330592	0.0248335
DPYSL3	0.115825	0.443362	-0.232687	0.119667	0.182703	0.224249	-0.121523	0.421099	-0.146568	0.331063	0.0201395	0.894315	-0.179469	0.232698	0.448058	0.00179265	-0.237468	0.112041	-0.167368	0.266236	0.428791	0.00294659
PDYN	0.584398	2.00586e-05	0.232632	0.119757	-0.105292	0.486169	-0.201388	0.179568	-0.0625875	0.679451	0.319191	0.0306035	0.146872	0.330049	-0.130537	0.387211	-0.0806912	0.593976	0.176182	0.241508	-0.0964315	0.523787
SARAF	-0.00436885	0.977012	0.232521	0.119938	-0.207606	0.166224	0.215463	0.150412	-0.216881	0.147681	0.0870164	0.565275	0.101372	0.502636	0.0362227	0.811112	0.505962	0.000334267	-0.0106261	0.944123	0.100547	0.506136
ASIC4	0.037582	0.804161	-0.23245	0.120055	-0.165141	0.272743	0.0451063	0.765964	-0.101493	0.502124	0.1477	0.327298	0.0735069	0.627332	0.130324	0.38799	0.325806	0.0271336	0.104304	0.490293	-0.0746331	0.622052
PFN2	-0.0139892	0.926481	-0.232426	0.120095	0.0161881	0.914965	-0.146735	0.330504	0.00821369	0.956795	-0.0667115	0.659576	-0.224382	0.133838	0.45079	0.00166674	0.028225	0.852288	0.069949	0.644133	0.29993	0.0428543
ADGB	-0.163268	0.278294	-0.232379	0.12017	-0.0647635	0.668936	-0.11236	0.457212	0.0962728	0.524473	-0.352763	0.0161913	-0.159426	0.289915	0.145231	0.335538	-0.108533	0.472772	-0.00303755	0.984016	-0.351767	0.0165155
UBN1	0.147545	0.327814	0.232346	0.120225	0.183525	0.222135	0.151204	0.315825	0.149776	0.320469	-0.101477	0.502193	0.098032	0.516887	-0.196952	0.189546	-0.203372	0.17523	0.0558276	0.712494	0.280207	0.0592765
RALB	-0.114048	0.450433	-0.232134	0.120573	0.574083	3.02702e-05	-0.189273	0.20774	0.0136242	0.928394	-0.0137281	0.92785	-0.276307	0.0630551	0.129241	0.391982	-0.256167	0.0857241	-0.182901	0.223738	-0.0889344	0.556701
MPPED2	0.00927017	0.951244	-0.232105	0.120621	0.275505	0.0638561	-0.156566	0.298766	-0.211866	0.157508	0.21469	0.151916	-0.140338	0.352248	0.140593	0.351364	0.14509	0.336013	-0.239845	0.10839	-0.127215	0.399509
TRHDE	-0.132552	0.379859	-0.232093	0.12064	-0.0180614	0.905167	-0.17524	0.244074	0.129959	0.389334	-0.125755	0.404984	-0.00812655	0.957253	0.0504609	0.739107	-0.117362	0.437294	0.22521	0.13237	0.269136	0.0705019
BNIP2	-0.00262575	0.986182	0.232054	0.120705	-0.289028	0.0513989	0.0394689	0.794535	-0.204948	0.171838	0.228187	0.127197	0.42269	0.00342849	-0.31562	0.0326242	0.184851	0.218755	0.185364	0.217455	0.109373	0.469333
DCAF12L2	-0.022379	0.88264	-0.231982	0.120824	0.0248812	0.869626	0.431372	0.00276135	0.06546	0.665584	0.351578	0.0165777	-0.438623	0.00229474	0.166897	0.267605	-0.0654668	0.665551	-0.210939	0.159376	-0.106258	0.482158
JAZF1	0.130221	0.388369	0.23197	0.120843	-0.193129	0.198456	-0.295128	0.0464627	-0.0848815	0.57489	0.23362	0.118148	0.216508	0.148395	-0.00506576	0.973346	0.425651	0.0031866	0.0379656	0.802201	0.112481	0.456721
NBL1	0.268963	0.0706899	0.231948	0.12088	0.363729	0.0129625	-0.224756	0.133174	-0.226482	0.130142	0.0457777	0.762581	0.0878283	0.561638	-0.0801798	0.596324	-0.187559	0.211962	0.0684698	0.651171	-0.19261	0.199688
GABRA2	-0.08698	0.565438	0.231898	0.120961	-0.176098	0.241734	0.0268588	0.859364	0.384978	0.00824482	0.108334	0.47359	-0.0901843	0.551147	-0.112895	0.455057	-0.117045	0.438542	-0.00365577	0.980763	0.161654	0.283137
GHITM	0.138297	0.359365	0.231803	0.121119	-0.0895411	0.554001	0.201779	0.178707	-0.240885	0.106822	0.225936	0.131094	0.400995	0.00574868	-0.428675	0.00295517	0.214442	0.152402	0.0975936	0.518772	-0.04348	0.774177
FAAP24	0.0974559	0.519365	0.23174	0.121222	-0.209445	0.16242	0.258993	0.0822065	-0.0328008	0.828675	0.442972	0.00204965	0.0183314	0.903756	-0.125414	0.406269	0.230355	0.123526	-0.08658	0.567234	-0.0497129	0.742841
EFNA5	-0.0184879	0.902938	-0.231676	0.121328	-0.128322	0.395384	0.149105	0.322668	0.309719	0.0362052	-0.0194364	0.897984	-0.276902	0.062467	0.0903195	0.550547	-0.0971687	0.520603	0.0164508	0.91359	0.0344264	0.820321
FNIP2	0.239703	0.108605	-0.231658	0.121357	0.361172	0.0136614	-0.201678	0.178928	-0.198519	0.185978	0.344139	0.0191877	-0.495283	0.000466052	0.420196	0.00364468	-0.456148	0.0014424	-0.225206	0.132378	-0.152301	0.312285
NHS	-0.328756	0.0256959	0.231384	0.121811	-0.289959	0.0506187	0.161142	0.284685	0.406572	0.00504945	-0.264958	0.075152	0.00895864	0.952881	-0.19627	0.191113	-0.1428	0.343779	-0.0511901	0.735473	0.132405	0.380393
SIM1	-0.206819	0.167873	-0.231248	0.122037	-0.332554	0.0239387	0.159998	0.288165	0.244981	0.100813	0.150295	0.318777	-0.173736	0.248208	-0.0539137	0.721948	0.273605	0.0657842	-0.0149918	0.921228	-0.219734	0.142296
TRMT61B	0.00884475	0.953479	-0.231196	0.122124	-0.278728	0.060688	-0.263559	0.0767623	-0.14705	0.329456	0.364345	0.0127985	0.205522	0.170612	-0.188782	0.208943	0.181613	0.227072	0.11383	0.451305	-0.165761	0.270922
GUCY1B3	-0.166774	0.267964	-0.23117	0.122166	-0.0916344	0.544735	0.182529	0.224696	-0.00935697	0.950788	-0.19182	0.201573	-0.0047881	0.974806	-0.0558098	0.712582	-0.121752	0.420217	0.0420603	0.781366	0.12882	0.39354
LOC101750578	0.385873	0.00808397	0.230956	0.122522	-0.0395077	0.794338	0.281508	0.0580579	-0.261238	0.079493	0.00034155	0.998203	-0.0248636	0.869717	0.110072	0.466482	-0.132709	0.37929	0.0595784	0.694091	0.25189	0.0912705
TCF12	-0.213974	0.15332	-0.230852	0.122696	0.328265	0.0259304	-0.0349055	0.817862	0.0534023	0.724482	-0.132072	0.381603	-0.154524	0.305191	0.000473027	0.997511	-0.179136	0.233579	-0.0511036	0.735903	-0.23011	0.123936
EML5	-0.0926082	0.540451	0.230848	0.122703	0.132299	0.380779	-0.247145	0.097745	0.130334	0.387954	0.451574	0.00163208	-0.186149	0.215478	-0.0332827	0.826196	0.0432405	0.775389	-0.0514893	0.733983	0.11048	0.464822
PSMC3IP	-0.0690206	0.648547	0.230837	0.12272	-0.0965151	0.523425	-0.0242543	0.872883	-0.0746378	0.62203	-0.00757294	0.960163	0.296589	0.0453397	-0.225001	0.132739	0.279145	0.0602871	0.0129538	0.931909	0.0106071	0.944223
IMPA1	0.0158252	0.916865	-0.230791	0.122797	-0.0732821	0.628388	0.175223	0.244118	0.0100461	0.947169	-0.0298107	0.84409	-0.147957	0.326449	0.153006	0.310025	-0.251503	0.0917853	0.0861294	0.569261	0.12856	0.394501
TPST1	0.0433854	0.774655	0.230708	0.122936	0.287411	0.0527759	-0.0867743	0.566361	-0.171605	0.254146	0.115125	0.446141	0.320945	0.0296496	-0.331283	0.0245152	-0.0302646	0.841746	0.0660584	0.662709	0.222097	0.137947
AURKAIP1	-0.00183529	0.990342	0.23059	0.123132	-0.296163	0.0456649	0.105361	0.485883	-0.261014	0.0797606	-0.00694605	0.963458	0.629032	2.84117e-06	-0.386982	0.00788853	0.49275	0.000503487	0.311143	0.0353128	0.229595	0.124803
PIKFYVE	0.0743384	0.623432	-0.230544	0.123209	0.151879	0.313645	-0.36777	0.0119199	0.131878	0.382309	-0.0845746	0.576278	-0.298808	0.0436759	0.415672	0.00406741	-0.184943	0.218521	0.112309	0.457416	-0.207441	0.166568
LIMD2	-0.225191	0.132404	-0.23042	0.123417	0.310749	0.0355578	-0.242315	0.104693	-0.162506	0.280574	-0.0224035	0.882513	0.242635	0.104222	-0.177701	0.237408	0.00524361	0.97241	0.318022	0.031253	0.100581	0.505995
TMEM63A	-0.0322849	0.83133	-0.230399	0.123452	0.290354	0.0502909	-0.0839641	0.579044	0.129622	0.390574	-0.206808	0.167895	-0.117089	0.438367	-0.0434557	0.7743	0.0624111	0.680306	-0.102289	0.498761	0.106141	0.482643
SCLT1	-0.165424	0.271909	-0.230314	0.123595	0.257241	0.0843734	-0.00630892	0.966808	0.467421	0.00105597	-0.222571	0.137087	-0.337001	0.0220099	-0.00652127	0.965691	-0.295688	0.0460298	-0.305054	0.0392595	0.0353486	0.81559
TSC22D2	-0.0300115	0.843052	0.230261	0.123682	-0.179567	0.232438	0.194006	0.196387	-0.150085	0.319462	0.0967102	0.522582	0.0971826	0.520543	0.00529698	0.97213	-0.0471744	0.755557	-0.086583	0.56722	0.433992	0.00258393
CLIP4	-0.259303	0.0818272	0.230202	0.123782	-0.320329	0.0299817	0.287801	0.0524406	0.217434	0.146625	-0.324661	0.0277099	0.0106151	0.944181	-0.0404252	0.789669	-0.104096	0.491166	0.0142866	0.924923	0.10857	0.472623
COL14A1	0.109872	0.467296	-0.230178	0.123822	0.269229	0.0704014	-0.0664994	0.660593	0.497597	0.000434063	-0.218647	0.14433	-0.119137	0.430345	-0.18291	0.223714	-0.180166	0.230859	-0.0922344	0.542094	-0.185389	0.217393
MIEF2	0.296194	0.0456412	0.229955	0.124197	0.513702	0.000260895	-0.172878	0.250587	-0.2264	0.130283	-0.206208	0.169159	0.00570772	0.96997	0.114293	0.449454	-0.128912	0.393197	0.0943439	0.532854	-0.16026	0.287367
RASSF5	-0.0767542	0.612159	0.229775	0.1245	0.200301	0.181978	-0.154941	0.303872	-0.13602	0.367406	0.125916	0.404377	0.00159908	0.991585	-0.124533	0.409599	-0.0827422	0.584599	-0.180905	0.22892	0.134245	0.37375
SPATA13	0.125087	0.407505	0.229766	0.124515	0.106289	0.482029	-0.124676	0.409059	-0.12694	0.400537	0.0284197	0.85128	0.0976343	0.518597	-0.0312267	0.836782	-0.243652	0.102733	0.0804182	0.595229	0.0958859	0.526149
ZNF326	-0.274301	0.0650719	-0.229745	0.12455	-0.00821747	0.956775	0.426732	0.00310209	-0.271759	0.0677016	0.139465	0.35528	-0.0228127	0.880382	-0.112996	0.454652	0.16666	0.268295	-0.0411256	0.786109	-0.0819183	0.588358
N4BP2	-0.0201192	0.89442	-0.229626	0.124752	-0.132005	0.381847	-0.311707	0.0349643	0.405496	0.00517833	0.118605	0.432421	0.0779524	0.6066	-0.0438277	0.772419	-0.01878	0.901412	0.15428	0.305963	0.155336	0.302627
B3GALT1	-0.134386	0.373242	-0.229372	0.12518	-0.269731	0.069859	0.378005	0.00959524	-0.0367994	0.808161	0.102735	0.496881	-0.319964	0.0301799	0.311456	0.0351189	0.0500519	0.741148	-0.222925	0.136447	0.0350525	0.817108
LOC101751087	0.0835143	0.581086	0.229263	0.125365	-0.156796	0.298046	-0.124131	0.411126	0.129263	0.391901	-0.0332093	0.826574	0.27599	0.063371	-0.0607218	0.688515	0.231785	0.121148	0.0998101	0.509276	0.313707	0.0337514
LOC121111400	0.0358145	0.813203	-0.229245	0.125396	0.345871	0.018551	0.0262861	0.862333	0.238289	0.11077	-0.0180837	0.90505	-0.395026	0.00658889	0.218469	0.144666	-0.20329	0.175406	-0.28918	0.0512704	-0.0411298	0.786088
HAUS1	-0.0924327	0.541222	0.229134	0.125583	-0.260238	0.0806924	0.0851917	0.573488	0.226024	0.130941	-0.179423	0.232819	0.261198	0.0795403	-0.135739	0.368407	0.120537	0.424906	0.136504	0.365689	0.396785	0.00633083
MDGA2	-0.0833768	0.581711	-0.229068	0.125695	0.194558	0.195092	-0.0174742	0.908237	0.0123002	0.935338	-0.120849	0.423698	-0.156588	0.298696	0.315499	0.0326948	-0.102024	0.49988	-0.15341	0.308732	0.266233	0.0737084
DOT1L	-0.0876884	0.562264	-0.228974	0.125855	0.538147	0.000114583	0.0184631	0.903068	0.149869	0.320166	-0.189616	0.2069	-0.173282	0.249464	-0.0340264	0.822374	-0.431158	0.00277629	-0.149172	0.322448	0.103774	0.492516
RPAIN	0.216884	0.147675	0.228888	0.126	-0.231667	0.121343	-0.122286	0.418168	-0.150436	0.318318	0.27882	0.0605997	0.529244	0.000155754	-0.471543	0.000939661	0.0508418	0.737208	0.267738	0.0720323	0.036915	0.80757
EVC2	-0.20015	0.182314	-0.228857	0.126053	-0.118405	0.4332	-0.122255	0.418288	-0.110203	0.465948	-0.173	0.250248	0.00455612	0.976027	0.229077	0.12568	0.176965	0.239388	-0.0225961	0.88151	-0.0943473	0.532839
DLGAP2	-0.486859	0.000601199	-0.228772	0.126198	-0.0987739	0.513704	-0.143641	0.340916	0.362578	0.0132731	-0.14416	0.339153	-0.088159	0.560159	0.0040706	0.978581	-0.301445	0.0417641	0.0477	0.752919	0.201681	0.178922
STX7	0.121731	0.420298	-0.228675	0.126364	0.0863138	0.568431	-0.300938	0.0421266	-0.0599394	0.692329	0.193206	0.198274	0.017207	0.909634	-0.0159395	0.916266	-0.0583149	0.700271	0.19578	0.192247	-0.447384	0.00182497
RPS6KA1	-0.00403057	0.978791	0.228628	0.126443	-0.0991217	0.512215	-0.153017	0.309991	-0.116764	0.43965	0.162466	0.280694	0.0885176	0.558559	-0.178566	0.235095	-0.149888	0.320103	-0.0413742	0.784847	-0.241523	0.105868
SNAP25	-0.0460306	0.761307	-0.228622	0.126453	0.188635	0.209304	-0.104583	0.489126	-0.155187	0.303097	-0.146065	0.332741	0.046461	0.759142	0.106999	0.479089	0.073114	0.629179	0.0868888	0.565847	-0.331384	0.0244688
CRYZL1	0.10092	0.504555	0.228557	0.126565	0.11046	0.464903	-0.127888	0.396999	-0.219062	0.143551	0.209344	0.162627	0.296251	0.0455974	-0.287527	0.0526759	0.0826344	0.58509	-0.173141	0.249856	-0.0648788	0.668381
FUK	-0.0048428	0.974519	0.228356	0.126908	0.0683053	0.651956	-0.0506575	0.738127	-0.117624	0.436262	0.144554	0.337823	0.225248	0.132304	-0.139323	0.355777	0.0803548	0.59552	0.205258	0.171176	0.548	8.07529e-05
PAFAH1B1	-0.081832	0.588752	-0.228255	0.12708	0.224503	0.133623	0.304274	0.0397902	-0.125013	0.407783	-0.27448	0.0648905	-0.362921	0.0131799	0.37575	0.0100707	-0.153749	0.307651	-0.266528	0.0733771	-0.165612	0.271359
CCDC186	-0.173134	0.249876	-0.22805	0.127431	0.486578	0.000606251	0.155637	0.301677	-0.114931	0.446913	0.0110998	0.941637	-0.0380055	0.801998	-0.210132	0.161015	0.0852386	0.573276	-0.0558983	0.712146	-0.155511	0.302075
RPS6KB2	0.0741167	0.624471	0.227967	0.127574	-0.0467528	0.757675	-0.0190242	0.900137	0.00316433	0.983349	0.0486865	0.747975	0.215456	0.150426	-0.317601	0.0314903	-0.022695	0.880995	0.202307	0.177548	0.215547	0.15025
IRF2	-0.214239	0.1528	0.227833	0.127805	-0.250696	0.0928674	0.218913	0.143829	-0.20493	0.171876	-0.204788	0.172179	0.168043	0.264285	-0.139254	0.356018	0.180019	0.231246	-0.0577563	0.70301	-0.0750445	0.620128
REEP5	0.30012	0.0427163	0.227786	0.127885	-0.218287	0.145008	-0.421202	0.00355604	-0.0718116	0.635315	0.166167	0.269732	0.529315	0.000155379	-0.261767	0.0788634	0.172203	0.25247	0.317761	0.0314001	0.030992	0.837992
NUP160	-0.034827	0.818265	-0.227767	0.127917	0.00264645	0.986073	-0.0682711	0.652119	-0.0883538	0.55929	-0.213108	0.155031	0.220352	0.141149	-0.026556	0.860934	0.142058	0.346318	0.0727029	0.631113	-0.217024	0.147408
LOC112532813	0.153047	0.309893	0.227757	0.127934	-0.0795384	0.599275	-0.017943	0.905786	-0.000193716	0.998981	0.00476979	0.974903	0.25844	0.0828852	-0.269911	0.0696658	0.125849	0.404632	0.205402	0.170869	0.0579413	0.702103
GLE1	0.0545622	0.71874	0.227701	0.128031	0.0289753	0.848407	-0.0980165	0.516954	-0.133674	0.375804	-0.0407092	0.788225	0.248958	0.0952302	-0.180756	0.22931	0.180135	0.230939	0.0849208	0.574712	0.150509	0.318079
NPY5R	0.0140059	0.926394	-0.22767	0.128084	0.277411	0.0619671	-0.19335	0.197934	-0.173397	0.249146	-0.0794747	0.599568	-0.0776606	0.607951	0.103177	0.495018	-0.14832	0.32525	-0.0885944	0.558216	-0.150399	0.318437
ADIPOR2	0.217263	0.146951	0.227631	0.128151	-0.00178541	0.990604	0.139573	0.354905	0.0231107	0.878831	-0.0394673	0.794544	0.236603	0.113392	-0.297107	0.0449466	0.128294	0.395488	0.252533	0.0904191	0.0691482	0.64794
TAC3	0.211095	0.15906	-0.227609	0.128189	-0.162039	0.281977	0.158784	0.291886	-0.146312	0.331915	0.297688	0.0445095	0.109666	0.468137	0.0251558	0.8682	0.0761907	0.61478	0.0289756	0.848405	-0.080509	0.594812
TBC1D14	-0.111491	0.460718	-0.22751	0.12836	-0.320752	0.0297532	-0.269232	0.0703979	0.45336	0.00155554	0.0189737	0.900401	-0.169148	0.261113	0.16541	0.271952	0.168766	0.262206	-0.20345	0.175059	-0.207533	0.166377
RPRD1A	-0.0922024	0.542235	-0.22744	0.12848	0.204643	0.17249	0.246955	0.0980105	-0.189656	0.206804	-0.34786	0.0178419	0.128429	0.394987	-0.108735	0.471947	-0.189411	0.207401	-0.0187149	0.901752	-0.120671	0.424386
CDK19	-0.0903714	0.550317	-0.227434	0.128492	-0.119218	0.43003	0.0364531	0.809933	0.0139057	0.926919	0.266065	0.0738979	-0.38902	0.00753993	0.376775	0.00985225	-0.261821	0.0788003	-0.20347	0.175017	-0.0443609	0.769725
ROCK1	-0.031979	0.832905	-0.227354	0.128628	0.553094	6.70975e-05	-0.189713	0.206665	0.207255	0.166957	-0.0247695	0.870206	-0.552904	6.75682e-05	0.225356	0.132113	-0.289274	0.0511917	-0.3033	0.0404609	-0.313088	0.0341233
TECPR1	-0.148099	0.325981	0.227309	0.128706	-0.135517	0.369198	0.525109	0.000179102	-0.155478	0.302179	-0.111927	0.458958	0.0725675	0.63175	-0.231271	0.121998	0.135891	0.367866	-0.131856	0.382388	0.0200445	0.89481
C12orf4	0.0942575	0.533231	0.227302	0.128718	-0.257733	0.0837607	-0.19999	0.182671	0.129418	0.391329	-0.199771	0.18316	0.286829	0.0532788	0.0142544	0.925091	0.0117155	0.938406	0.358645	0.0143837	0.377556	0.00968843
ATP11B	-0.00529772	0.972126	-0.227302	0.128719	0.389217	0.00750686	-0.229989	0.124139	-0.0248595	0.869738	-0.137457	0.362318	-0.0502957	0.739931	0.243785	0.102539	0.0541122	0.720965	0.0460176	0.761373	0.185274	0.217684
POLDIP2	0.102095	0.499577	-0.227266	0.128782	-0.0710334	0.638994	0.00962554	0.949378	-0.212621	0.155998	0.0884165	0.55901	0.315145	0.0329011	-0.173546	0.248733	0.0992077	0.511848	0.405164	0.00521857	0.144897	0.336664
GULP1	-0.243046	0.103618	-0.227249	0.128809	-0.211772	0.157695	0.324119	0.0279861	0.0270873	0.85818	-0.133477	0.376513	-0.12092	0.423424	0.0431463	0.775865	0.210584	0.160094	0.0177227	0.906937	-0.0822247	0.586959
KIF27	-0.154395	0.3056	0.227183	0.128925	-0.135037	0.370909	-0.135414	0.369565	0.636439	1.9932e-06	-0.0464989	0.758952	-0.16541	0.271952	-0.113423	0.452938	-0.208112	0.165171	-0.150292	0.318788	0.114481	0.448704
PDE9A	0.0103422	0.945614	0.226982	0.129273	0.000759794	0.996002	-0.0886358	0.558032	0.0118837	0.937523	-0.0619006	0.682783	0.215783	0.149793	-0.263835	0.076442	-0.000327812	0.998275	0.0559614	0.711835	0.254125	0.0883385
TESC	0.262902	0.0775275	0.226949	0.129329	0.127651	0.397882	0.114294	0.449453	-0.40544	0.00518514	-0.069761	0.645026	0.295409	0.0462446	-0.226795	0.129597	0.271498	0.0679759	0.128286	0.395519	0.0443959	0.769549
HGH1	0.0334251	0.825464	-0.226882	0.129445	0.460135	0.00129335	-0.154954	0.30383	-0.104815	0.488158	-0.0744054	0.623118	0.293905	0.0474198	-0.303442	0.0403625	-0.0759187	0.616047	0.171002	0.255845	0.194938	0.194202
AP1S2	0.204179	0.173486	-0.226734	0.129703	0.216158	0.149068	-0.188053	0.210739	-0.273184	0.0662177	-0.079442	0.599719	0.0425086	0.779094	0.232642	0.119741	0.0567513	0.707947	0.177079	0.23908	-0.0450255	0.766371
SULT4A1	0.251493	0.0917987	-0.226699	0.129763	0.359221	0.0142161	-0.0841514	0.578195	-0.215017	0.151278	-0.0779247	0.606728	-0.58077	2.32191e-05	0.828473	1.19265e-12	-0.161032	0.285019	-0.235887	0.11452	-0.123196	0.414687
C6orf120	0.0921081	0.542649	0.22659	0.129953	0.194603	0.194985	-0.159408	0.289968	0.181267	0.227974	0.0323303	0.831096	0.0489245	0.746783	-0.164451	0.27478	-0.167775	0.265058	0.109099	0.470455	0.217883	0.145773
TOX2	-0.109865	0.467325	-0.226566	0.129995	-0.0110249	0.94203	0.288557	0.0517964	0.038914	0.797363	-0.176868	0.23965	-0.0781436	0.605715	0.0663535	0.661292	-0.276642	0.0627231	0.114621	0.448145	0.235579	0.115008
LOC771456	0.0215617	0.886898	0.226396	0.130291	-0.243807	0.102508	-0.0268545	0.859386	-0.213915	0.153437	0.0405488	0.78904	0.332027	0.0241763	-0.137903	0.360749	0.00123509	0.9935	0.192634	0.19963	0.291985	0.0489553
JMJD1C	-0.106875	0.479603	-0.226392	0.130298	-0.185014	0.21834	-0.12116	0.4225	0.094894	0.530457	0.0587126	0.698324	-0.331697	0.0243258	0.363461	0.0130342	-0.256221	0.0856561	-0.0110007	0.942157	-0.226297	0.130464
ZNF518B	-0.0251447	0.868258	-0.226264	0.130521	0.12981	0.389882	-0.314887	0.0330528	0.19862	0.185749	0.117082	0.438395	-0.358025	0.0145657	0.045177	0.765608	-0.25167	0.0915621	-0.0879578	0.561059	-0.518789	0.000220965
RMND1	-0.17451	0.246074	-0.226242	0.13056	-0.0916428	0.544699	-0.145101	0.335977	-0.137883	0.36082	-0.183816	0.22139	0.0502372	0.740223	0.00511379	0.973093	0.0481789	0.750517	0.207183	0.167108	-0.275981	0.0633799
RABGAP1	0.10537	0.485847	-0.226141	0.130737	0.135786	0.368239	-0.141221	0.349197	0.29006	0.050535	0.0276552	0.855238	-0.527617	0.000164587	0.235072	0.115815	-0.145711	0.33393	-0.442278	0.00208712	-0.28301	0.0566749
CADM3	-0.223444	0.135513	-0.226044	0.130905	-0.0937022	0.535656	0.067343	0.656552	-0.134686	0.372165	0.0737465	0.626207	0.267415	0.0723893	-0.164288	0.275262	0.0323717	0.830883	0.122627	0.416862	0.238269	0.110801
ATF3	0.0502206	0.740306	-0.225929	0.131108	-0.170618	0.256931	-0.155291	0.302766	-0.0637472	0.67384	0.425883	0.00316825	0.0763615	0.613985	0.0342927	0.821007	0.362177	0.013383	-0.19665	0.190239	0.14102	0.349888
INTS8	0.053399	0.724498	0.225921	0.131121	-0.128062	0.396351	0.0292936	0.846761	0.0230974	0.8789	-0.165095	0.272878	0.43303	0.00264784	-0.406832	0.00501877	0.121209	0.422311	0.267219	0.0726068	0.117337	0.437393
PLD1	-0.0437493	0.772815	0.225899	0.13116	0.141554	0.34805	-0.0489924	0.746443	-0.0731527	0.628996	0.0886394	0.558016	-0.261251	0.0794777	0.195971	0.191804	-0.260795	0.0800231	-0.0797168	0.598454	-0.0420345	0.781497
CMC1	-0.300052	0.0427654	-0.2258	0.131333	-0.0693827	0.646824	-0.0715685	0.636463	0.0268524	0.859397	0.0562983	0.710176	0.260791	0.0800269	-0.175537	0.243262	0.333638	0.0234557	0.0342582	0.821184	0.032899	0.828169
LOC107052945	-0.149873	0.320154	0.225794	0.131343	-0.0720575	0.634155	-0.236522	0.11352	0.0294144	0.846137	-0.0402373	0.790624	0.204992	0.171742	-0.17852	0.235218	0.191924	0.201325	-0.0432144	0.77552	0.161369	0.284
PPP2R2D	0.157481	0.295916	-0.225789	0.131353	0.0772175	0.610006	0.0166914	0.912331	0.258555	0.0827439	-0.319631	0.0303616	-0.344924	0.0188971	0.549442	7.66506e-05	-0.103462	0.493821	-0.0469592	0.756638	0.0101034	0.946868
TRAF7	0.299865	0.0429016	0.225677	0.131549	0.223613	0.13521	-0.302352	0.0411231	-0.219338	0.143034	0.0986304	0.514319	0.359818	0.0140445	-0.0523776	0.729566	0.00482029	0.974637	0.206497	0.168549	0.262233	0.078313
EIF4E2	-0.0303567	0.84127	-0.225608	0.13167	0.114028	0.450514	0.0194947	0.89768	0.00865935	0.954453	-0.292798	0.0483001	-0.131993	0.381892	0.138231	0.359596	0.290802	0.0499213	-0.256728	0.085017	-0.166842	0.267765
ASNS	0.0491758	0.745526	0.225583	0.131714	-0.0579598	0.702012	0.0244346	0.871946	-0.130202	0.388439	-0.0965273	0.523372	0.220061	0.141689	-0.0526926	0.728002	-0.0494899	0.743956	0.241584	0.105777	0.340759	0.0204837
WWP1	-0.308298	0.0371139	-0.225572	0.131733	0.156689	0.298382	-0.225047	0.132658	0.279018	0.0604088	-0.192273	0.200491	-0.167899	0.2647	0.145335	0.335189	-0.372164	0.0108688	-0.0867583	0.566433	0.515696	0.000244531
ZNF618	-0.0652778	0.66646	0.225564	0.131747	0.210615	0.160032	-0.177468	0.238033	0.0442773	0.770148	-0.0836312	0.580555	-0.0186957	0.901853	-0.00970884	0.94894	-0.18765	0.211735	-0.0173785	0.908737	0.444475	0.00197052
CTNNA2	-0.0303601	0.841253	-0.225553	0.131767	0.171671	0.253961	-0.106073	0.482926	-0.149689	0.320754	-0.113985	0.450684	0.159208	0.290582	-0.0186085	0.902308	0.0683768	0.651615	0.181365	0.227717	-0.210573	0.160117
COL4A2	-0.0194868	0.897721	0.225478	0.131899	-0.252706	0.090191	-0.0450592	0.766201	-0.0379959	0.802047	-0.0988673	0.513304	0.184998	0.21838	-0.0214234	0.887619	0.427182	0.00306748	0.165607	0.271372	-0.000636181	0.996652
BAIAP2	0.051469	0.734084	-0.225326	0.132166	-0.110724	0.463827	-0.145505	0.334619	0.0823259	0.586497	-0.145565	0.334418	0.0766099	0.612829	0.102241	0.498963	-0.0508128	0.737353	0.195533	0.192818	-0.126033	0.403938
EIF3D	-0.420275	0.00363761	-0.225303	0.132206	-0.126697	0.401444	0.214088	0.153096	0.000415914	0.997811	-0.164157	0.275649	0.266149	0.0738031	-0.193935	0.196553	0.0465981	0.758453	0.16814	0.264005	0.125756	0.40498
ESF1	-0.0401593	0.791021	-0.225301	0.132209	0.232826	0.11944	-0.386099	0.00804387	-0.135832	0.368076	-0.108402	0.47331	0.210069	0.161143	-0.0971624	0.52063	0.0465153	0.758869	0.260174	0.0807694	-0.0160495	0.91569
TBL1XR1	-0.174254	0.246777	0.225196	0.132395	-0.0134883	0.929107	-0.0197123	0.896544	0.116209	0.44184	0.361561	0.013553	-0.00253133	0.986679	-0.263593	0.0767233	-0.141479	0.348307	-0.109515	0.468752	0.0934973	0.536553
GUF1	0.0781966	0.605469	0.225116	0.132537	-0.115722	0.443768	-0.170442	0.257427	-0.0611747	0.68631	-0.0429671	0.776772	0.419391	0.00371692	-0.166193	0.269657	0.308807	0.0367864	0.184957	0.218486	0.234961	0.115991
ARFIP1	0.0409385	0.78706	-0.224975	0.132785	-0.20311	0.175798	0.129846	0.389751	0.0111516	0.941365	0.54898	7.79431e-05	-0.171815	0.253557	0.0923518	0.541577	0.206473	0.1686	-0.178168	0.236157	-0.00323287	0.982988
MHCY2B2	-0.0361629	0.811418	0.224871	0.132969	-0.0708118	0.640042	-0.044529	0.768877	-0.0648451	0.668543	-0.0414717	0.784352	0.210018	0.161247	-0.180218	0.230721	0.346416	0.0183544	0.0748191	0.621182	0.00277135	0.985416
SLC25A26	0.150805	0.317118	0.22472	0.133237	0.0211864	0.888854	0.00164796	0.991328	-0.126903	0.400674	0.0158902	0.916524	0.362801	0.0132126	-0.152523	0.311573	-0.0105793	0.944369	0.293709	0.0475749	0.237093	0.112625
KIAA2022	-0.15909	0.290944	-0.22469	0.13329	0.0292258	0.847112	0.410404	0.00461325	-0.180455	0.230098	0.00577758	0.969602	-0.287724	0.052507	0.280951	0.0585772	0.0459821	0.761552	-0.18277	0.224074	0.0434484	0.774337
ITGB8	-0.383071	0.00859673	-0.22451	0.13361	-0.107129	0.478554	-0.0463427	0.759737	0.0566031	0.708676	-0.0635973	0.674564	-0.124943	0.408048	0.0813281	0.591057	-0.20872	0.163911	0.0361977	0.81124	0.269137	0.0705017
N4BP2L2	0.14688	0.330022	0.224472	0.133678	-0.059156	0.696155	-0.0357607	0.813478	-0.0218241	0.88553	-0.0535909	0.723547	0.239367	0.109117	-0.10854	0.472746	-0.0389348	0.797257	0.140765	0.350769	0.520022	0.000212163
STX2	0.23006	0.12402	-0.224428	0.133755	0.288819	0.0515749	-0.0666729	0.659761	0.0772642	0.60979	0.099002	0.512728	-0.219565	0.142611	0.240136	0.107949	-0.343178	0.0195489	-0.137811	0.361071	0.133814	0.375298
PSMA4	-0.153475	0.308525	-0.224351	0.133892	0.22183	0.138433	-0.227718	0.128001	-0.137611	0.361776	-0.069704	0.645297	-0.0603729	0.690215	0.00642276	0.966209	-0.19775	0.187723	-0.0931974	0.537866	-0.238876	0.109868
RBBP4	0.185745	0.216494	0.224292	0.133997	0.202794	0.176484	0.18559	0.216886	-0.160819	0.285666	0.224934	0.132859	-0.104461	0.489639	0.0932232	0.537753	0.129086	0.392553	-0.249076	0.0950689	-0.208555	0.164252
KMT2D	0.0121466	0.936143	0.224167	0.134221	-0.173665	0.248403	-0.00432031	0.977267	-0.114641	0.448066	-0.0794043	0.599893	0.400683	0.0057901	-0.363352	0.0130635	0.165297	0.272284	0.0460317	0.761302	0.0597948	0.693034
KDM7A	0.0963856	0.523985	-0.224151	0.134249	0.901192	1.3957e-17	-0.138624	0.35822	-0.121567	0.420931	0.0360045	0.812229	-0.313018	0.0341652	0.0375191	0.804482	-0.286414	0.0536397	-0.181927	0.226255	-0.245802	0.0996394
BCL7A	-0.338039	0.0215791	-0.224123	0.134298	-0.20574	0.17015	-0.0428759	0.777234	0.20148	0.179366	-0.275733	0.0636274	-0.0476519	0.75316	0.0977031	0.518301	0.0638977	0.673113	0.0877346	0.562057	0.213401	0.15445
LACC1	0.00537699	0.971709	0.223903	0.134692	0.0069595	0.963387	0.212077	0.157086	0.380171	0.00915681	-0.202165	0.177859	-0.122084	0.418944	-0.226389	0.130303	-0.124341	0.410327	-0.12765	0.397884	0.0670322	0.65804
SLC6A6	0.0228622	0.880125	0.223728	0.135005	-0.12102	0.423039	-0.224403	0.1338	-0.0195849	0.897209	-0.123545	0.413356	0.395718	0.00648637	-0.153853	0.307322	-0.0193183	0.898601	0.186608	0.214329	0.369993	0.0113777
AHI1	-0.361779	0.0134927	-0.223693	0.135067	-0.206252	0.169067	0.0825785	0.585345	0.501351	0.000386356	-0.167174	0.266799	0.0449059	0.766975	-0.112657	0.456015	-0.0806665	0.594089	0.0963935	0.523951	0.279128	0.0603036
FAM188A	-0.0628751	0.678058	-0.22338	0.135628	-0.0432844	0.775166	0.449779	0.00171237	0.357825	0.0146249	-0.0913987	0.545775	-0.235267	0.115503	0.0355587	0.814513	-0.0518728	0.732075	-0.214731	0.151836	-0.207818	0.165782
SCRN1	0.277308	0.0620677	0.223347	0.135687	0.277978	0.0614139	0.272865	0.0665476	-0.159403	0.289986	0.0442948	0.770059	0.140806	0.350628	-0.29149	0.049358	0.0329449	0.827933	0.0835246	0.58104	0.0274286	0.856412
LOC107053500	-0.0330483	0.827402	-0.223219	0.135917	0.0469122	0.756874	0.134574	0.372568	0.0825078	0.585667	-0.123567	0.41327	-0.294034	0.0473182	0.336647	0.0221584	0.0676966	0.654862	-0.0252345	0.867791	0.0691597	0.647885
TBC1D5	0.0679414	0.653693	0.222993	0.136325	-0.214971	0.151369	-0.0978258	0.517774	-0.150515	0.318059	0.186246	0.215236	0.15273	0.310907	-0.074626	0.622085	0.0815887	0.589864	0.298141	0.0441704	0.0537406	0.722805
REEP2	0.106464	0.481303	-0.222989	0.136333	0.619581	4.40767e-06	-0.160369	0.287033	0.0902274	0.550955	-0.240089	0.108021	-0.531994	0.00014179	0.363869	0.012925	-0.559125	5.36741e-05	-0.26918	0.0704553	-0.152158	0.312746
ITIH5	-0.199467	0.183841	-0.222966	0.136374	-0.0659824	0.663074	0.403923	0.0053718	-0.233271	0.118714	-0.25329	0.0894253	-0.0457039	0.762953	-0.064311	0.671117	-0.00143569	0.992445	-0.145019	0.336253	-0.49839	0.000423568
AHNAK2	-0.100831	0.50493	-0.222962	0.13638	-0.0525461	0.728729	-0.0132408	0.930405	0.249225	0.094864	0.255061	0.0871324	-0.559502	5.29222e-05	0.426122	0.00314955	-0.194088	0.196195	-0.248743	0.0955261	0.210048	0.161186
SEC31A	0.11755	0.436554	-0.222868	0.136549	0.50937	0.00029993	-0.234428	0.116846	-0.214183	0.152909	-0.235739	0.114755	0.0462993	0.759956	-0.0261714	0.862929	-0.0434004	0.774579	0.152275	0.312369	0.0032951	0.982661
MDH1	0.143547	0.341234	-0.222727	0.136805	0.0122096	0.935813	-0.178991	0.233966	-0.0402156	0.790735	-0.112421	0.456963	-0.452503	0.00159187	0.897957	2.74003e-17	-0.109634	0.468269	-0.1527	0.311005	0.0998739	0.509003
C1QC	-0.0218468	0.885412	0.222719	0.13682	-0.18333	0.222633	-0.193122	0.198473	-0.210087	0.161107	0.0312065	0.836886	0.26386	0.0764132	-0.204803	0.172147	0.309315	0.0364614	0.171735	0.253781	0.0269072	0.859113
LOC121109802	0.0679204	0.653793	0.222652	0.13694	0.319875	0.0302283	-0.0458931	0.762	-0.212677	0.155888	-0.189524	0.207125	0.0351382	0.816669	-0.106782	0.479986	-0.231306	0.121941	0.209959	0.161367	-0.113103	0.454219
SLC22A15	0.0870437	0.565152	-0.222577	0.137076	0.754301	1.42066e-09	-0.160023	0.288089	-0.131819	0.382524	-0.13568	0.368617	-0.168443	0.263134	0.0446206	0.768414	-0.312029	0.0347666	-0.176623	0.240312	0.0255615	0.866093
ST6GALNAC5	-0.316466	0.0321358	-0.222562	0.137103	-0.317662	0.0314556	0.302129	0.0412795	0.319702	0.0303226	-0.121604	0.420789	-0.138011	0.36037	0.0561063	0.711121	0.21844	0.144721	-0.0185978	0.902364	0.139193	0.35623
PECAM1	-0.157984	0.294356	0.222304	0.137571	-0.0386386	0.798767	-0.036053	0.811981	-0.0324376	0.830544	-0.0250427	0.868787	-0.0479883	0.751473	0.0746361	0.622038	-0.081302	0.591176	0.0123595	0.935026	0.367202	0.012062
PAN3	-0.105577	0.484983	-0.222225	0.137715	0.101431	0.502385	-0.293014	0.0481278	0.169899	0.258969	-0.0646784	0.669346	-0.151926	0.313494	-0.0343364	0.820782	-0.263785	0.0765007	-0.0868715	0.565925	-0.120266	0.425957
CDC42SE2	-0.125517	0.405883	-0.222184	0.137789	0.093711	0.535618	-0.147436	0.328173	0.199657	0.183414	-0.0449952	0.766524	-0.309341	0.0364453	0.298549	0.0438679	0.01238	0.934919	-0.318488	0.030993	-0.113711	0.451782
DISP2	0.158255	0.293517	-0.221885	0.138333	0.847058	1.17041e-13	-0.189408	0.207409	-0.181185	0.228187	-0.197455	0.188396	-0.304828	0.0394124	0.238773	0.110025	-0.467936	0.00104078	-0.210599	0.160064	-0.159507	0.289668
FAM214B	0.209341	0.162634	0.221839	0.138418	-0.265491	0.0745465	-0.21787	0.145797	0.386333	0.00800238	0.119086	0.430543	0.185311	0.217589	-0.226233	0.130575	0.271157	0.0683369	0.00405464	0.978665	-0.0347318	0.818754
TMEM200C	-0.159539	0.28957	-0.22182	0.138452	-0.176205	0.241446	0.345512	0.0186816	0.126273	0.403036	0.25458	0.0877499	-0.434654	0.00254069	0.236817	0.113056	-0.136597	0.365359	-0.430784	0.00280262	-0.0987327	0.513881
UBE3B	-0.0528401	0.727269	0.221552	0.138941	-0.143939	0.339904	0.17664	0.240265	-0.116872	0.439222	-0.00190757	0.989961	0.17646	0.240753	-0.139738	0.354331	0.0734305	0.627691	0.0966343	0.52291	0.0763305	0.61413
VSTM2L	0.172818	0.250754	0.221546	0.138953	-0.0401718	0.790958	0.295346	0.0462933	-0.330615	0.0248228	-0.0723888	0.632592	0.435022	0.00251696	-0.305286	0.0391025	0.247654	0.0970338	0.223726	0.135007	0.171841	0.253486
LOC107055337	-0.304506	0.0396316	-0.221469	0.139093	-0.128861	0.393385	0.0309882	0.838012	-0.0391769	0.796023	-0.12393	0.41189	0.0522348	0.730275	-0.104981	0.487467	0.17622	0.241404	-0.0472189	0.755334	-0.128156	0.396001
ADIPOR1	0.121046	0.422939	0.221469	0.139094	-0.0438164	0.772476	-0.189729	0.206625	-0.30869	0.0368615	0.260668	0.0801747	0.606875	7.77993e-06	-0.508174	0.000311602	0.312598	0.0344196	0.144142	0.339215	-0.0481791	0.750517
KATNBL1	-0.162245	0.281357	-0.221397	0.139224	0.347772	0.0178727	-0.25517	0.0869931	0.312651	0.0343875	-0.249712	0.0941986	-0.158903	0.291521	0.0387798	0.798047	0.027686	0.855078	0.108867	0.471403	-0.0309978	0.837962
SLF1	-0.09235	0.541585	0.221295	0.139412	-0.0836653	0.5804	-0.146098	0.332631	-0.164227	0.275444	-0.00488718	0.974285	0.0633654	0.675685	-0.0362625	0.810908	-0.175367	0.243725	0.00657017	0.965434	-0.129378	0.391475
ATP2B1	-0.202239	0.177697	-0.221075	0.139815	-0.015979	0.916059	-0.290461	0.0502028	0.21223	0.156778	-0.00222098	0.988312	-0.185147	0.218005	0.263655	0.0766507	0.036757	0.808378	-0.164011	0.276085	0.290883	0.049855
CNOT4	-0.0465975	0.758456	0.220953	0.140041	-0.0137233	0.927875	-0.0794706	0.599587	0.150642	0.317649	-0.164648	0.274196	0.220113	0.141592	-0.289623	0.0508995	-0.0773341	0.609465	0.118455	0.433007	0.215612	0.150122
PDCD6	0.181137	0.228313	0.220787	0.140345	-0.0478147	0.752343	-0.0193104	0.898642	0.144598	0.337673	0.0156609	0.917724	0.35481	0.0155415	-0.574381	2.99183e-05	0.279615	0.0598382	0.170703	0.256689	-0.292473	0.0485616
RNF8	0.101187	0.50342	-0.220771	0.140375	-0.0214623	0.887416	-0.0622406	0.681133	0.0120099	0.936861	-0.071353	0.637482	-0.0858758	0.570402	0.125136	0.407319	-0.0748201	0.621177	0.0533267	0.724856	-0.239892	0.108319
ABCF2	0.122114	0.418828	0.220757	0.140401	-0.204483	0.172832	-0.00768303	0.959584	0.138319	0.359285	-0.0249903	0.869059	0.166431	0.268963	-0.250973	0.092495	-0.10439	0.489936	0.2237	0.135055	0.239182	0.109399
RMDN2	0.00659851	0.965285	0.22071	0.140488	-0.173461	0.248968	0.20205	0.178111	-0.00502348	0.973568	-0.213263	0.154724	-0.065171	0.666974	0.0432777	0.7752	-0.0791584	0.601027	-0.226879	0.129451	-0.482713	0.000679841
STON2	0.133445	0.376629	0.220426	0.141013	-0.257529	0.0840142	-0.238773	0.110025	0.154749	0.304477	0.193595	0.197355	0.12358	0.413221	-0.179695	0.2321	0.22201	0.138105	0.0863705	0.568176	-0.109666	0.468137
CNGB1	0.133997	0.374641	0.220344	0.141163	-0.131259	0.384568	-0.168196	0.263846	-0.101465	0.502242	-0.101027	0.504101	0.128873	0.393341	-0.102974	0.495874	0.0641089	0.672093	-0.133463	0.376564	-0.23945	0.108991
FNBP1	0.123539	0.413378	0.220318	0.141211	0.282344	0.0572843	0.018225	0.904312	0.0334776	0.825194	0.122732	0.416461	-0.287698	0.0525294	0.214906	0.151496	-0.229796	0.124464	-0.0564941	0.709212	0.195189	0.19362
ZNF804A	0.0492874	0.744968	0.220308	0.141231	0.127577	0.398156	-0.196513	0.190553	0.132648	0.379512	-0.219693	0.142372	0.0956964	0.526971	-0.0692274	0.647563	-0.215267	0.150793	-0.0117982	0.937971	0.10234	0.498546
MYO10L	-0.0266352	0.860523	0.220195	0.141439	-0.155746	0.301337	-0.107156	0.478441	-0.0586999	0.698386	-0.00156968	0.99174	0.33901	0.0211823	-0.210104	0.161071	0.0362453	0.810996	0.217113	0.147238	0.354268	0.0157112
HRH3	0.0234192	0.877226	-0.220004	0.141794	0.188193	0.210393	0.0498616	0.742098	-0.223846	0.134794	-0.150404	0.31842	0.119997	0.427	-0.0337883	0.823598	0.0448784	0.767113	0.0531721	0.725623	-0.0273803	0.856662
TBXT	-0.217846	0.145844	0.219791	0.142189	0.15333	0.30899	-0.12594	0.404288	-0.103348	0.494301	-0.0540161	0.721441	0.155103	0.30336	-0.235398	0.115295	0.0761788	0.614836	0.206803	0.167906	0.0852523	0.573214
PRPF40A	0.129044	0.392708	-0.219707	0.142345	-0.283013	0.0566722	0.0929717	0.538856	-0.0617709	0.683413	0.301868	0.0414638	0.202295	0.177574	-0.167485	0.265897	0.425494	0.00319899	0.061026	0.687034	-0.0745933	0.622238
MRPS6	-0.0774711	0.60883	0.219539	0.142659	-0.187478	0.212162	0.0401175	0.791234	-0.0397829	0.792937	-0.0574106	0.704707	0.225591	0.1317	-0.404881	0.00525321	-0.0333711	0.825742	-0.0272715	0.857225	-0.44909	0.00174413
HSBP1L1	-0.00204013	0.989264	-0.21944	0.142845	-0.258271	0.0830936	-0.105307	0.486108	-0.133044	0.378078	0.264815	0.0753155	0.346304	0.0183947	-0.223168	0.136009	0.302405	0.0410857	0.239463	0.10897	0.0725257	0.631947
CCDC51	-0.179986	0.231333	0.219341	0.143028	-0.234524	0.116691	-0.0852332	0.573301	-0.184103	0.220656	0.0161045	0.915402	0.196014	0.191706	0.00916412	0.951801	0.329486	0.02535	0.0861113	0.569342	-0.0238808	0.874825
NVL	-0.185854	0.21622	-0.219337	0.143037	0.0513726	0.734564	-0.0993726	0.511143	-0.280245	0.059241	0.134588	0.372517	0.250089	0.0936873	-0.122475	0.417444	0.0800764	0.596799	0.118602	0.432431	0.358383	0.0144602
RPL7	0.0872753	0.564114	0.219319	0.14307	-0.317955	0.031291	-0.0126529	0.933488	-0.267163	0.0726694	-0.141324	0.34884	0.339795	0.0208663	0.229773	0.124502	0.274621	0.0647468	0.208075	0.165247	0.306044	0.0385942
TMEM200A	-0.0546195	0.718457	-0.219276	0.14315	-0.180609	0.229695	-0.103607	0.493216	0.553276	6.66509e-05	-0.185373	0.217433	-0.237451	0.112067	0.316896	0.0318897	-0.230733	0.122893	-0.116973	0.438825	0.334056	0.0232717
KCNH1	-0.17749	0.237975	-0.219275	0.143152	-0.228896	0.125987	0.357405	0.0147495	-0.18536	0.217465	-0.225845	0.131254	-0.110613	0.464279	0.241076	0.106535	-0.025339	0.867248	0.119346	0.429531	-0.0439938	0.77158
PLPP4	-0.339188	0.0211106	-0.219225	0.143246	-0.378664	0.00945989	0.101792	0.50086	0.467641	0.00104947	-0.0811326	0.591952	-0.196047	0.19163	0.174969	0.244814	0.0467249	0.757816	-0.18954	0.207085	0.23026	0.123686
OSBPL1A	-0.0720872	0.634015	-0.219223	0.14325	0.0309789	0.83806	0.474915	0.000853176	-0.0578425	0.702587	-0.205609	0.170428	-0.373907	0.0104744	0.10205	0.499767	-0.211758	0.157723	-0.151484	0.314918	-0.309027	0.0366454
LOC424727	0.152643	0.311187	0.219168	0.143353	-0.204959	0.171813	-0.00157723	0.9917	-0.216527	0.148358	-0.00535731	0.971812	0.308231	0.0371571	-0.195919	0.191925	0.0831859	0.582579	0.15642	0.299222	0.0967823	0.52227
RAPGEF4	-0.069644	0.645582	0.218955	0.143752	-0.0289225	0.84868	-0.0982171	0.516092	-0.11002	0.466695	-0.0684778	0.651133	0.375592	0.0101048	-0.1644	0.27493	0.0699518	0.64412	-0.0530915	0.726022	0.41608	0.00402753
PLEKHA8	0.0573323	0.705091	-0.218904	0.143847	-0.14079	0.350683	-0.166626	0.268394	-0.133548	0.37626	0.0172536	0.909391	0.0756229	0.617427	0.126391	0.402594	0.232224	0.120426	0.0575423	0.70406	-0.0802229	0.596126
ZNF410	-0.136269	0.366521	-0.218687	0.144255	0.281581	0.0579897	0.245428	0.100173	-0.0601407	0.691347	-0.0548487	0.717325	0.0859585	0.57003	-0.235415	0.11527	-0.126834	0.400934	-0.208593	0.164175	-0.196303	0.191037
DENND1B	-0.0638413	0.673385	0.218649	0.144326	-0.285948	0.054047	0.0779638	0.606547	0.251042	0.0924024	-0.161646	0.283163	0.112267	0.457585	0.100949	0.50443	0.0933868	0.537037	0.0212205	0.888677	0.430463	0.00282539
DYNC1I1	0.0189676	0.900432	-0.218609	0.144401	0.236423	0.113675	-0.239955	0.108224	-0.21163	0.157981	0.174518	0.246052	0.0720295	0.634287	0.0913011	0.546206	0.0257903	0.864906	0.0309647	0.838133	0.121688	0.420465
KBP	0.447308	0.00182863	0.218597	0.144423	-0.0353504	0.815581	-0.0143117	0.924791	0.197214	0.188945	-0.104939	0.487641	-0.228401	0.126831	0.241474	0.10594	-0.117792	0.435603	-0.149075	0.322765	-0.202723	0.17664
KIDINS220	-0.112198	0.457862	-0.218561	0.144491	-0.0609702	0.687305	0.547535	8.21173e-05	-0.14899	0.323045	-0.0829278	0.583754	-0.495408	0.000464268	0.594404	1.3274e-05	-0.258506	0.082804	-0.153386	0.308811	0.0686235	0.650439
KIAA0319L	0.0364063	0.810172	0.218558	0.144497	0.444406	0.00197405	-0.213123	0.155	-0.194962	0.194147	-0.166481	0.268816	0.120155	0.426385	-0.179514	0.232579	-0.143863	0.34016	-0.102893	0.496214	0.0566464	0.708462
SQRDL	-0.106537	0.481001	0.21832	0.144946	-0.10835	0.473526	-0.0739372	0.625313	-0.0343173	0.820881	-0.0032962	0.982655	0.267529	0.0722629	-0.320473	0.0299039	0.207157	0.167162	0.133128	0.377775	0.210526	0.160213
CRCP	0.0578987	0.702312	-0.21828	0.145022	-0.0281161	0.852851	-0.0153517	0.919343	-0.218132	0.145301	0.121602	0.420797	0.180982	0.228719	-0.159422	0.289927	-0.00336655	0.982285	0.245759	0.0997016	-0.0278252	0.854357
CAMK2B	0.120848	0.423704	-0.218169	0.145231	0.0263815	0.861839	-0.00177968	0.990634	-0.0535366	0.723816	0.0781019	0.605907	0.220951	0.140044	-0.116772	0.439618	-0.100027	0.508352	0.184817	0.218841	0.0658398	0.663758
DRC3	0.117937	0.435037	0.218168	0.145234	-0.129069	0.392618	0.0115999	0.939012	-0.17269	0.25111	-0.119488	0.428975	0.228861	0.126047	-0.139562	0.354945	0.487649	0.000587181	0.0856265	0.571526	-0.0554526	0.714343
MCF2	-0.0617779	0.683379	0.218167	0.145234	-0.0756423	0.617337	-0.101276	0.503045	-0.0703057	0.642441	0.0840533	0.57864	0.0147852	0.922311	0.0672395	0.657048	-0.0250316	0.868845	-0.0485362	0.748728	0.380145	0.00916187
LOC121110641	0.207255	0.166957	0.218086	0.145388	-0.118287	0.433664	-0.0402237	0.790694	-0.0665012	0.660584	-0.0507071	0.73788	0.23016	0.123852	-0.078122	0.605814	-0.0166767	0.912408	0.213867	0.153531	0.220167	0.141492
ZCRB1	-0.0619386	0.682599	-0.217926	0.145691	0.403887	0.00537629	0.0843553	0.577271	-0.24558	0.0999556	-0.348152	0.0177399	-0.0228481	0.880198	0.0221275	0.88395	-0.147969	0.32641	-0.0681089	0.652893	-0.142479	0.344875
RHPN1	-0.224427	0.133757	-0.217911	0.145719	0.107417	0.477365	-0.0477907	0.752464	0.268404	0.0713	-0.36259	0.0132699	-0.100295	0.507211	0.080865	0.593179	-0.291921	0.0490075	0.117083	0.438391	0.239816	0.108434
ATP5C1	0.00642506	0.966197	0.217683	0.146151	-0.19379	0.196894	-0.133856	0.375148	-0.156956	0.297548	-0.0936164	0.536032	0.844147	1.71733e-13	-0.386605	0.00795454	0.310134	0.035943	0.566807	4.01341e-05	0.424856	0.00325005
MID1	0.282263	0.057359	0.217524	0.146454	0.419816	0.00367858	-0.128336	0.395334	-0.124667	0.409095	-0.0747977	0.621282	0.285253	0.0546594	-0.200477	0.181585	-0.0526647	0.72814	0.0753227	0.618828	-0.00570431	0.969987
CLN8	0.0624379	0.680176	-0.217407	0.146676	-0.164592	0.274363	-0.00437908	0.976958	-0.147132	0.329183	0.455061	0.00148562	0.0518478	0.732199	0.0395646	0.794048	-0.118793	0.431687	-0.0342591	0.821179	0.159309	0.290272
GAL3ST1	0.129664	0.390419	0.217336	0.146813	0.251643	0.091598	-0.102341	0.498539	-0.27725	0.0621246	-0.162784	0.279742	0.506603	0.000327546	-0.244435	0.101597	0.0668422	0.65895	0.24177	0.1055	-0.0181229	0.904846
PDCL	0.08714	0.56472	0.217272	0.146934	-0.0448336	0.76734	-0.192403	0.200182	-0.140451	0.351854	0.0981945	0.516189	0.111824	0.459374	0.0948032	0.530853	0.161026	0.285036	0.17539	0.243663	0.359386	0.0141684
FN1	-0.138698	0.35796	0.217245	0.146986	-0.141666	0.347663	0.117867	0.435311	0.0716181	0.636229	-0.0724711	0.632205	0.0800253	0.597034	-0.234175	0.117253	0.0744569	0.622877	-0.0658964	0.663486	0.162751	0.279842
AMPH	-0.0164573	0.913556	0.217107	0.147248	-0.00863739	0.954569	0.0429885	0.776664	0.122054	0.419059	0.0590526	0.696661	-0.174771	0.245358	0.276059	0.0633022	-0.0471385	0.755737	0.105191	0.486593	0.306908	0.0380211
PTAR1	-0.177988	0.236639	0.216937	0.147574	-0.165942	0.270391	0.701791	5.51666e-08	-0.160539	0.286515	-0.108244	0.47396	-0.130406	0.387691	0.02347	0.876962	-0.0792956	0.600394	0.00950617	0.950005	0.238806	0.109974
LOC424401	-0.0451613	0.765687	-0.216863	0.147715	0.323465	0.0283221	0.138292	0.35938	0.0593037	0.695433	-0.24703	0.0979058	0.163511	0.27757	-0.304831	0.0394104	-0.121385	0.421633	0.0616487	0.684006	-0.152207	0.312588
ZMYM4	0.138126	0.359964	0.21655	0.148314	-0.279753	0.0597075	0.484305	0.000648621	0.255471	0.0866082	-0.0681065	0.652904	-0.0880064	0.560842	-0.0508056	0.737388	-0.0708448	0.639886	0.0233707	0.877479	-0.102527	0.497755
TUBD1	0.410373	0.00461665	0.216493	0.148424	-0.120919	0.423429	-0.0885929	0.558223	-0.0341841	0.821565	-0.0595498	0.694231	0.328815	0.0256674	-0.209473	0.162361	0.063747	0.67384	0.198522	0.18597	0.266547	0.0733564
SLC44A3	0.170458	0.257382	0.216392	0.148618	-0.0935897	0.536148	-0.067928	0.653757	-0.0205208	0.892325	-0.0654293	0.665731	0.256583	0.0851983	-0.0492094	0.745358	0.0976582	0.518494	0.156628	0.298571	0.224812	0.133074
EPHA5	-0.073907	0.625454	0.216305	0.148785	0.233882	0.117724	-0.225219	0.132356	0.081298	0.591195	-0.0592834	0.695532	0.0308398	0.838778	0.132616	0.379628	-0.0768937	0.61151	-0.120796	0.423904	0.3873	0.00783319
MOCS1	0.0491433	0.745689	0.216211	0.148967	-0.0200672	0.894691	-0.12252	0.41727	-0.13706	0.363719	-0.120044	0.426815	0.104567	0.489196	0.00456728	0.975968	-0.0561846	0.710736	0.0801786	0.596329	-0.264939	0.0751736
FBXW8	0.193057	0.198627	0.216173	0.14904	-0.199927	0.182811	0.0120138	0.93684	0.122021	0.419183	-0.18259	0.22454	0.296872	0.0451248	-0.161283	0.284259	0.0330788	0.827245	0.433396	0.00262334	0.11305	0.454435
TMEM192	0.226568	0.129992	-0.216117	0.149148	0.479635	0.000744088	-0.126549	0.402002	0.224043	0.13444	-0.223008	0.136297	-0.283642	0.0561016	0.185778	0.216412	-0.260969	0.0798137	0.061688	0.683815	-0.104689	0.488687
CGA	0.313156	0.0340819	0.216067	0.149245	-0.129967	0.389305	0.0983273	0.515619	-0.0732451	0.628562	0.282815	0.0568535	0.0129854	0.931744	-0.15356	0.308254	0.0431837	0.775676	-0.118032	0.434662	-0.104765	0.488367
HPS4	0.24738	0.097416	0.215724	0.149907	0.26439	0.0758033	-0.194407	0.195444	-0.160533	0.286534	0.295559	0.0461288	-0.0175451	0.907866	0.0708136	0.640034	-0.0445934	0.768552	0.113063	0.454383	0.329594	0.0252991
DLST	0.169461	0.260219	0.215713	0.149929	-0.193789	0.196897	-0.0738363	0.625786	-0.131263	0.384551	-0.034884	0.817972	0.161363	0.284017	-0.130277	0.388163	0.0927591	0.539788	0.198792	0.18536	-0.28891	0.0514984
BDH1A	-0.0864733	0.567714	0.215645	0.150059	-0.320414	0.0299353	0.487902	0.000582746	-0.2045	0.172795	-0.11494	0.446876	-0.11783	0.435456	0.144567	0.337779	0.0338562	0.823249	-0.262985	0.0774309	-0.112399	0.457054
LOC121110129	0.0662977	0.66156	0.215577	0.150191	-0.0913094	0.546169	0.239891	0.10832	0.0245694	0.871246	-0.021585	0.886777	0.282543	0.0571025	-0.509844	0.000295421	-0.104487	0.489527	0.39577	0.00647866	-0.114038	0.450475
TMED8	0.324042	0.0280251	0.215565	0.150215	-0.0607906	0.688179	0.284127	0.0556643	-0.294377	0.0470487	0.36604	0.012357	-0.253972	0.0885363	0.344814	0.0189375	-0.0295684	0.845341	-0.18542	0.217314	0.109553	0.468598
TBPL1	0.017578	0.907694	0.21543	0.150477	-0.161272	0.284294	-0.13814	0.359914	-0.0542099	0.720482	0.334728	0.0229786	0.0239411	0.874512	0.0190381	0.900064	0.00441084	0.976791	0.0203194	0.893376	0.281562	0.0580073
SPSB4	-0.139978	0.353495	0.215193	0.150935	-0.0407174	0.788183	-0.0640176	0.672534	-0.0629203	0.677839	-0.0705515	0.641276	0.0131501	0.93088	0.124447	0.409926	0.14031	0.352345	0.190829	0.203957	0.0812585	0.591375
ELL2	0.00915452	0.951852	-0.215174	0.150972	-0.188625	0.209329	-0.271371	0.0681098	-0.206126	0.169334	0.33269	0.0238773	0.100407	0.506733	0.047351	0.75467	0.245159	0.100557	0.0265178	0.861132	-0.0826658	0.584947
LOC121107768	0.0298403	0.843937	0.215144	0.151031	-0.0983123	0.515683	-0.111178	0.461985	-0.0793315	0.600228	-0.0294997	0.845696	0.421553	0.00352556	-0.221818	0.138455	0.180971	0.228747	0.927919	1.7896e-20	0.238404	0.110592
TAF15	0.0496512	0.74315	0.215121	0.151076	-0.159474	0.289766	0.305183	0.0391723	0.00300256	0.9842	-0.232483	0.12	0.199629	0.183478	-0.0735087	0.627324	0.256162	0.0857304	0.171871	0.2534	0.198178	0.186749
GLTSCR1L	-0.00795048	0.958178	-0.215054	0.151207	-0.145614	0.334255	0.539106	0.0001108	0.00731608	0.961513	-0.235272	0.115496	-0.235968	0.114393	0.202808	0.176455	-0.148843	0.323529	0.0311289	0.837286	-0.0289339	0.848621
RAB3A	0.0920009	0.543121	0.215043	0.151227	-0.0801086	0.596651	-0.209177	0.16297	0.115205	0.445822	-0.297235	0.0448501	0.349579	0.0172476	-0.11853	0.432713	-0.0062311	0.967217	0.056632	0.708533	0.115575	0.444353
CDV3	0.0992483	0.511674	-0.214984	0.151343	-0.152272	0.312379	0.0831441	0.582769	-0.150585	0.317832	0.144415	0.338292	0.145755	0.333782	0.0915704	0.545018	-0.0125781	0.93388	0.0603679	0.690239	0.184036	0.220827
CAPRIN1	-0.0689329	0.648965	-0.214982	0.151348	-0.155674	0.301561	0.168467	0.263067	-0.379421	0.00930664	-0.0235972	0.8763	-0.0198587	0.89578	0.299748	0.0429869	0.0947617	0.531033	-0.19114	0.203207	-0.040984	0.786829
OPRK1	-0.143429	0.341635	-0.214912	0.151484	-0.125235	0.406947	-0.153538	0.308325	-0.0528843	0.72705	-0.156745	0.298206	0.273934	0.0654466	-0.181832	0.226503	0.286141	0.0538779	0.230416	0.123424	-0.216509	0.148394
VAPA	0.176474	0.240716	-0.214822	0.151658	0.284871	0.0549987	0.109187	0.470095	0.234471	0.116776	-0.275575	0.0637858	-0.308539	0.0369582	0.109015	0.470799	-0.263484	0.076849	-0.338774	0.0212785	-0.230236	0.123726
SLC25A15	-0.14196	0.346652	-0.214776	0.151749	-0.22444	0.133734	-0.0633621	0.675701	0.540286	0.0001063	0.0794006	0.59991	0.0466645	0.758119	-0.120087	0.426652	-0.120545	0.424875	-0.171633	0.254068	0.0961548	0.524984
RABGEF1	0.0164567	0.913559	-0.214616	0.152062	-0.11385	0.451227	-0.168571	0.262765	0.494394	0.000478896	0.381999	0.00880031	-0.326133	0.0269714	0.176467	0.240735	-0.231457	0.12169	-0.239263	0.109275	-0.201286	0.179792
LOC112531075	0.0322802	0.831354	0.214544	0.152202	-0.0894227	0.554528	-0.110932	0.462983	-0.080244	0.596029	-0.0312727	0.836545	0.414757	0.00415795	-0.2128	0.155642	0.168519	0.262914	0.925258	3.86468e-20	0.222722	0.136813
GUCY1A3	0.019854	0.895804	0.214371	0.15254	-0.0249741	0.869143	-0.167597	0.265575	-0.194436	0.195377	-0.0499299	0.741757	0.120614	0.424607	0.15076	0.317265	0.0241455	0.873449	0.0716584	0.636039	0.0478135	0.752349
U2SURP	-0.121401	0.421571	-0.21437	0.152543	-0.394359	0.00668912	0.262461	0.0780451	-0.00681649	0.964139	-0.227186	0.128919	-0.056204	0.71064	0.227289	0.128741	0.124241	0.410708	-0.11299	0.454673	0.0997977	0.509329
MBD5	-0.130531	0.387231	0.214351	0.15258	-0.280035	0.0594393	0.138579	0.358376	0.0474886	0.75398	-0.122748	0.416399	-0.0570159	0.706646	-0.0851727	0.573574	0.180484	0.230022	-0.0810433	0.592361	-0.151009	0.316457
DMXL1	-0.0969154	0.521696	-0.21428	0.152718	-0.0517316	0.732777	-0.15065	0.317621	0.0632825	0.676086	-0.107803	0.475774	0.250116	0.093651	-0.0141274	0.925757	-0.0038415	0.979786	0.36595	0.0123803	0.158109	0.29397
BLOC1S3	0.250251	0.0934675	0.214045	0.153181	0.0683396	0.651792	-0.249877	0.0939748	-0.172334	0.252105	0.0865946	0.567169	0.202099	0.178004	0.0445993	0.768522	0.16815	0.263978	0.241096	0.106505	0.171468	0.254533
STK26	0.112858	0.455205	-0.213845	0.153574	0.0768231	0.611838	-0.232998	0.119158	0.158936	0.291418	0.0137538	0.927715	-0.263198	0.0771817	0.173065	0.250068	-0.00705062	0.962908	-0.0796386	0.598814	-0.255086	0.0871004
RNLS	0.0873709	0.563686	-0.213783	0.153696	0.200272	0.182043	-0.2066	0.168332	-0.160139	0.287736	-0.128166	0.395966	0.211664	0.157913	-0.0510236	0.736302	0.0417146	0.78312	0.266675	0.073213	0.140165	0.352846
IRAK2	0.0581128	0.701262	0.213729	0.153803	-0.0901139	0.551458	-0.0707203	0.640476	-0.0525599	0.72866	-0.0227195	0.880868	0.260272	0.080652	0.0143221	0.924737	-0.091793	0.544037	0.507364	0.000319733	0.382086	0.00878353
MHCY2B7	-0.0293512	0.846464	0.21363	0.153997	-0.0594304	0.694814	-0.0470157	0.756354	-0.0667828	0.659234	-0.0327096	0.829144	0.216589	0.148241	-0.18706	0.2132	0.353592	0.0159254	0.0917739	0.544121	6.04957e-05	0.999682
SGCB	0.0621148	0.681743	0.213608	0.154042	-0.130792	0.386274	0.0653545	0.666091	-0.281667	0.0579096	-0.177835	0.237048	0.236017	0.114315	-0.0897125	0.55324	0.226498	0.130113	0.309169	0.0365547	0.0344472	0.820214
PNLDC1	0.132591	0.379719	0.213599	0.154058	-0.100035	0.508317	-0.0668567	0.65888	0.0135878	0.928585	-0.0726468	0.631377	0.0054626	0.971259	0.0707863	0.640163	-0.0436251	0.773443	0.273974	0.0654063	0.0340842	0.822078
MAP2	-0.0589467	0.697178	-0.213503	0.154248	-0.0658556	0.663682	0.0426481	0.778387	-0.0290325	0.848111	0.187409	0.212334	-0.601035	1.00195e-05	0.804321	1.66029e-11	-0.0725461	0.631851	-0.262153	0.0784069	-0.0558537	0.712366
SEMA6A	-0.162483	0.280643	-0.213452	0.154349	-0.0769509	0.611244	-0.245287	0.100375	-0.126993	0.400338	0.0632002	0.676484	0.0376853	0.803633	0.322396	0.0288789	0.0951085	0.529524	0.205523	0.170611	0.434433	0.00255503
PCIF1	0.106935	0.479356	0.213428	0.154397	-0.101883	0.500476	0.0316629	0.834534	-0.0380213	0.801917	-0.184194	0.220425	0.0942265	0.533366	-0.101696	0.501265	-0.0381976	0.801017	-0.0685683	0.650701	-0.211003	0.159246
RTFDC1	-0.143014	0.343049	0.213208	0.154833	-0.363095	0.0131328	-0.0102127	0.946294	-0.2106	0.160063	0.155085	0.303418	0.357653	0.0146759	0.00375199	0.980257	0.495389	0.000464545	0.0422542	0.780383	0.255587	0.0864599
DNAJB14	0.128474	0.394822	0.213172	0.154904	-0.0499459	0.741677	-0.120682	0.424345	-0.170682	0.25675	-0.0173756	0.908752	0.227197	0.128901	0.0459447	0.76174	-0.0564692	0.709335	0.0088963	0.953208	0.171493	0.254463
SLC19A3	0.0796695	0.598671	-0.21312	0.155006	0.580882	2.31153e-05	0.0593589	0.695163	-0.222534	0.137153	-0.15899	0.291252	-0.156472	0.29906	0.147893	0.326662	0.0608785	0.687752	-0.211248	0.158751	-0.20063	0.181246
MAP3K13	0.137227	0.36313	0.213039	0.155167	-0.180466	0.230069	0.0880843	0.560493	0.200568	0.181384	0.0531198	0.725882	0.00642073	0.96622	0.175398	0.243641	0.140296	0.352394	-0.0168083	0.91172	0.181046	0.228549
INPP5K	0.0647589	0.668958	0.213007	0.15523	0.0335189	0.824982	-0.0605264	0.689467	0.0330135	0.827581	0.088667	0.557892	0.44595	0.00189548	-0.472034	0.00092661	0.170563	0.257086	0.00989228	0.947977	0.145437	0.334847
ATXN2	0.216906	0.147632	0.212863	0.155517	0.223229	0.135899	0.103314	0.494443	0.0243606	0.872331	-0.329436	0.0253735	-0.223089	0.136152	0.0910927	0.547126	-0.164815	0.273704	-0.162529	0.280506	-0.293222	0.0479621
SNAP47	0.228251	0.127088	-0.212784	0.155675	0.0248861	0.8696	0.0381221	0.801403	-0.155485	0.302158	-0.0687412	0.649878	-0.37293	0.010694	0.629319	2.80299e-06	-0.307988	0.0373147	0.134966	0.371164	0.056259	0.710369
BMT2	0.0730446	0.629505	0.212678	0.155886	-0.272073	0.0673726	0.0460848	0.761035	0.268857	0.070806	0.421564	0.0035247	-0.174035	0.247381	0.0115507	0.93927	0.0290188	0.848182	-0.143592	0.34108	0.038959	0.797134
RIF1	-0.135843	0.368034	-0.212571	0.156098	0.0818898	0.588488	0.233472	0.118388	-0.207262	0.166942	0.286595	0.0534814	-0.348734	0.0175378	0.0699957	0.643912	-0.309715	0.0362076	-0.268113	0.0716193	-0.477058	0.000801979
HM13	-0.125097	0.407465	-0.212544	0.156151	-0.0669993	0.658197	0.106193	0.482427	-0.0893323	0.554929	-0.107587	0.476665	0.129245	0.391964	-0.0395123	0.794315	-0.0821511	0.587295	-0.195817	0.19216	-0.00616444	0.967568
EIF2A	-0.175335	0.243814	-0.212264	0.15671	-0.209029	0.163275	0.265924	0.0740566	-0.109527	0.468703	-0.245148	0.100573	0.221828	0.138437	-0.20271	0.176668	0.060217	0.690974	-0.00494273	0.973993	-0.160364	0.287048
LOC121107476	0.215454	0.15043	0.212198	0.156843	0.11691	0.439074	-0.246418	0.0987674	-0.152051	0.313088	0.0501292	0.740762	0.218247	0.145084	0.00439097	0.976895	0.167303	0.266427	0.259472	0.0816206	0.168292	0.26357
SLC26A1	0.0898135	0.552792	0.212165	0.156909	0.0198703	0.895719	-0.163643	0.277178	0.15657	0.298755	0.0132133	0.930549	-0.191102	0.2033	0.100794	0.505088	-0.145597	0.33431	-0.0249795	0.869116	0.132797	0.378973
TUBGCP6	-0.085987	0.569901	0.212157	0.156926	0.053951	0.721763	-0.0764642	0.613507	0.269767	0.0698204	-0.0662598	0.661742	0.0794281	0.599783	-0.118309	0.433577	0.0237958	0.875267	0.228399	0.126834	0.10358	0.493326
NR1H3	-0.0872371	0.564285	0.21202	0.157198	-0.209078	0.163173	0.492875	0.000501574	-0.25724	0.0843744	0.3066	0.0382243	-0.0861676	0.569088	0.107427	0.477323	0.229111	0.125623	0.0349554	0.817606	0.0967638	0.52235
FUBP1	-0.225042	0.132668	-0.212007	0.157225	-0.233743	0.117949	0.737729	4.94741e-09	-0.0430963	0.776118	0.130757	0.386405	-0.337662	0.0217348	0.107859	0.475542	0.0505496	0.738664	-0.303725	0.0401668	-0.190857	0.20389
ALKBH8	0.0296397	0.844973	-0.211697	0.157847	0.699619	6.31027e-08	-0.152514	0.311602	-0.144303	0.338672	-0.148812	0.32363	0.0562885	0.710224	-0.129161	0.392277	-0.0775109	0.608645	0.0826625	0.584962	-0.00793211	0.958275
GPR158	-0.00990723	0.947898	-0.211526	0.158192	0.176667	0.240193	0.234052	0.11745	0.158121	0.293931	-0.229715	0.124602	-0.26095	0.0798372	0.16106	0.284935	-0.201379	0.179588	-0.085801	0.57074	0.0250515	0.868741
WDR81	-0.258221	0.0831562	-0.211432	0.158381	0.179126	0.233606	-0.151993	0.313276	-0.177676	0.237475	0.0726896	0.631176	-0.106271	0.482103	-0.0449408	0.766799	-0.0448198	0.767409	-0.00166341	0.991246	-0.136253	0.366578
BRSK1	-0.160532	0.286539	-0.211266	0.158716	-0.0262231	0.86266	0.212509	0.156221	-0.0316734	0.83448	-0.0983725	0.515425	-0.304343	0.0397431	0.329658	0.0252689	-0.0864996	0.567596	-0.133309	0.377121	0.249429	0.0945855
ZC3H7A	-0.252147	0.0909289	-0.211226	0.158795	-0.225106	0.132553	0.304512	0.0396274	0.0494272	0.744269	-0.175088	0.244489	0.00996358	0.947602	-0.0330942	0.827165	-0.0795004	0.59945	0.0612508	0.68594	-0.147996	0.32632
LOC121109549	-0.0550887	0.716139	0.211185	0.158878	-0.243129	0.103496	-0.0960937	0.525249	-0.10341	0.494041	0.0958803	0.526173	0.59174	1.48363e-05	-0.317611	0.0314845	0.195608	0.192644	0.226699	0.129763	0.481503	0.000704483
BMP3	0.0380775	0.80163	0.211035	0.159182	-0.0921025	0.542674	-0.108479	0.472996	0.542094	9.97266e-05	-0.137967	0.360523	-0.172726	0.251011	0.0650096	0.667751	-0.292064	0.0488917	-0.0545194	0.718952	-0.000468291	0.997536
EPC2	0.0445874	0.768582	-0.210967	0.159318	0.343709	0.0193487	0.0691158	0.648094	-0.174906	0.244987	-0.0729835	0.629792	0.0997801	0.509404	-0.151998	0.313261	-0.032149	0.832029	0.0488812	0.747	0.240664	0.107154
MGARP	0.119601	0.428537	0.210918	0.159418	-0.00949317	0.950073	0.0651313	0.667165	-0.320588	0.0298414	-0.0142051	0.92535	0.715867	2.24105e-08	-0.581789	2.22879e-05	0.255654	0.086375	0.508739	0.000306037	0.0380992	0.801519
BIN3	0.0875304	0.562971	0.210835	0.159586	-0.140815	0.350595	-0.110084	0.466432	0.224553	0.133533	-0.128085	0.396265	0.214523	0.152243	-0.116037	0.442521	0.181135	0.228318	0.1084	0.473321	0.0283635	0.851571
TATDN3	-0.0632683	0.676155	0.210689	0.159882	-0.510203	0.000292042	0.0182471	0.904197	0.190989	0.203572	0.418977	0.00375458	0.0891451	0.555762	-0.1634	0.2779	0.380252	0.00914072	0.17027	0.257916	-0.0388964	0.797453
MICU1	0.00846139	0.955494	0.210636	0.15999	0.129001	0.392869	0.148018	0.326247	-0.00043478	0.997712	-0.215257	0.150812	0.29497	0.0465852	-0.295104	0.0464815	0.123137	0.41491	0.166926	0.26752	0.234304	0.117045
TSNAX	-0.016556	0.91304	-0.210555	0.160154	-0.0697756	0.644957	0.000197755	0.998959	-0.225013	0.132718	-0.0482453	0.750185	0.203469	0.175019	-0.1704	0.257546	0.395574	0.00650747	0.027946	0.853732	-0.118027	0.434684
MMRN2	-0.196738	0.190037	-0.210526	0.160213	-0.0975956	0.518764	0.467157	0.00106384	-0.168809	0.262084	-0.188148	0.210503	-0.0983483	0.515529	0.128699	0.393986	-0.0551968	0.715605	0.152992	0.31007	0.263305	0.0770571
SLC4A10	0.0201452	0.894285	-0.210507	0.160252	0.366665	0.0121977	0.480025	0.000735664	-0.139653	0.354625	0.0759783	0.61577	-0.620157	4.29314e-06	0.471682	0.000935943	-0.263914	0.0763509	-0.430851	0.00279786	-0.114983	0.446704
ORC5	0.00733152	0.961432	-0.210506	0.160253	0.629206	2.81793e-06	-0.179619	0.232302	-0.124581	0.409418	-0.135725	0.368457	-0.111259	0.46166	0.214325	0.152631	-0.141247	0.349106	0.0239258	0.874592	0.105788	0.484107
CHMP2A	-0.328697	0.0257238	-0.210439	0.16039	-0.0770149	0.610947	-0.135995	0.367496	-0.0832784	0.582159	-0.069662	0.645496	0.393847	0.00676692	-0.324815	0.0276319	0.0920815	0.542767	0.301464	0.0417508	0.0797446	0.598326
COPS8	0.0649748	0.667918	0.210387	0.160495	0.0747392	0.621555	-0.0669663	0.658355	-0.285177	0.0547273	-0.193897	0.196643	0.0278824	0.854061	0.254175	0.0882738	0.0909654	0.547689	-0.101453	0.502295	0.183876	0.221236
KDM4B	-0.0181251	0.904834	0.210298	0.160677	-0.199991	0.182667	0.0173704	0.908779	0.0265049	0.861199	-0.038243	0.800786	0.0176159	0.907496	-0.0667898	0.659201	0.117535	0.436612	0.1111	0.462303	0.130381	0.387783
SPAG17	-0.190932	0.203708	0.210125	0.161029	-0.138712	0.35791	0.6449	1.31407e-06	-0.149739	0.320592	-0.131879	0.382306	0.0690073	0.64861	-0.194145	0.196061	0.0557068	0.713089	-0.148047	0.326153	0.0731053	0.629219
LYST	-0.000401545	0.997887	-0.210012	0.161259	0.501499	0.000384576	-0.024823	0.869928	-0.205462	0.170741	0.429908	0.00286513	-0.21995	0.141894	0.0206207	0.891804	-0.224915	0.132891	0.00285401	0.984981	-0.104581	0.489137
TMEM38A	0.109487	0.468867	-0.209931	0.161424	0.105843	0.48388	0.14533	0.335206	-0.226728	0.129714	-0.0814278	0.590601	0.0131046	0.931119	0.0379884	0.802085	-0.0195358	0.897465	-0.0106299	0.944103	-0.242286	0.104736
GTF2A2	0.194113	0.196135	0.209857	0.161575	0.0683863	0.651569	-0.0706743	0.640693	-0.40956	0.00470634	0.160272	0.287328	0.299053	0.0434957	-0.316633	0.0320404	0.190827	0.203962	0.293906	0.0474194	-0.00701715	0.963084
CCDC50	0.184762	0.21898	0.209791	0.161711	0.106421	0.481484	-0.31434	0.0333754	-0.15516	0.30318	0.469109	0.00100688	0.0476372	0.753234	-0.0811902	0.591688	0.0802379	0.596057	-0.233476	0.118382	0.0501009	0.740904
TMBIM6	0.0976711	0.518439	-0.20978	0.161732	0.561618	4.88802e-05	-0.178929	0.23413	-0.356238	0.0151014	-0.222541	0.137141	0.0371165	0.80654	-0.0027213	0.98568	-0.228084	0.127374	0.00688189	0.963795	-0.282569	0.0570779
UCKL1	-0.0477312	0.752763	0.209733	0.16183	-0.265522	0.0745105	0.0702648	0.642635	0.0642848	0.671244	0.0913815	0.545851	0.247861	0.0967452	-0.268421	0.0712817	0.057582	0.703865	0.101603	0.501659	0.175629	0.243012
TSSC1	0.201935	0.178363	0.209728	0.161839	0.00503178	0.973525	-0.0700267	0.643765	0.00781012	0.958916	0.00340894	0.982062	0.176881	0.239615	0.0455482	0.763737	-0.0672629	0.656936	0.381537	0.00888916	0.258142	0.0832528
SGSH	0.148773	0.323757	0.209723	0.161849	-0.176287	0.241222	-0.125135	0.407323	-0.16953	0.26002	0.12979	0.389957	0.25782	0.0836529	-0.176976	0.239359	0.395203	0.00656251	0.039468	0.79454	-0.042373	0.779781
KIAA1217	0.198056	0.187027	0.209612	0.162077	-0.0909766	0.547639	-0.0948531	0.530635	-0.0843249	0.577409	0.280028	0.0594467	0.0981816	0.516245	-0.0798535	0.597824	-0.113891	0.45106	-0.069479	0.646366	0.28489	0.0549816
CD82	-0.0365745	0.809312	0.209543	0.162217	0.113013	0.454581	0.413612	0.00427369	-0.370245	0.0113177	0.0903626	0.550356	-0.00298244	0.984306	-0.0564187	0.709583	0.201579	0.179147	-0.13201	0.381829	-0.134936	0.371273
DEPDC5	-0.208062	0.165275	0.209473	0.162361	-0.111874	0.459172	-0.145035	0.3362	0.473966	0.000876767	-0.121655	0.420593	0.029886	0.8437	-0.0731542	0.62899	-0.0325735	0.829845	0.275749	0.0636111	0.204957	0.171818
KPNA3	0.103507	0.493634	-0.20938	0.162554	0.121057	0.422895	-0.0430648	0.776278	0.358158	0.0145262	-0.152419	0.311906	-0.343519	0.01942	0.221177	0.139628	-0.252771	0.0901054	-0.146877	0.330032	-0.196082	0.191549
WRN	0.0812344	0.591486	0.209333	0.16265	-0.0509744	0.736547	-0.0931383	0.538125	-0.0717094	0.635798	0.00300001	0.984213	0.371324	0.0110634	-0.296381	0.0454982	0.0975653	0.518894	0.307376	0.0377137	0.0653123	0.666294
SIDT1	0.19769	0.18786	0.209329	0.162657	-0.127411	0.398775	-0.128129	0.396101	-0.199867	0.182945	0.198968	0.184963	0.496934	0.00044302	-0.282971	0.056711	0.171092	0.25559	0.199726	0.183261	-0.0276247	0.855396
THSD4	0.0957974	0.526533	-0.209216	0.162889	0.214661	0.151973	-0.194308	0.195677	-0.121495	0.421207	0.496391	0.000450484	-0.108996	0.470877	0.121886	0.419704	-0.0402883	0.790365	0.16932	0.260622	0.192334	0.200345
SF3B4	-0.0280856	0.853009	0.209212	0.162898	0.0409798	0.78685	-0.0867354	0.566536	-0.0827388	0.584614	-0.0420289	0.781525	0.421789	0.00350526	-0.439418	0.0022481	0.0766593	0.6126	0.0107439	0.943505	0.252818	0.0900437
LOC121113121	-0.273976	0.0654038	0.208978	0.163378	-0.167476	0.265926	-0.14804	0.326175	0.223959	0.134591	-0.0580675	0.701484	0.387148	0.00785957	-0.369909	0.011398	0.123468	0.413649	0.493869	0.000486631	0.414017	0.00423244
STRN	0.0199359	0.895377	0.20897	0.163395	0.0689708	0.648784	0.0771351	0.610389	-0.241108	0.106487	-0.0926722	0.54017	-0.194501	0.195225	0.362228	0.013369	-0.32548	0.0272966	0.106368	0.481701	0.42376	0.00333929
FLCN	-0.483995	0.000654602	-0.208749	0.163852	-0.103004	0.495747	-0.186139	0.215504	0.486134	0.000614342	-0.153353	0.308914	-0.0540593	0.721227	-0.0572246	0.70562	-0.176842	0.23972	0.114532	0.448503	0.121453	0.42137
ANKIB1	0.266121	0.0738342	-0.208744	0.163862	0.582422	2.17268e-05	-0.281739	0.0578432	-0.247954	0.0966167	0.194861	0.194383	-0.42773	0.00302584	0.409294	0.00473603	-0.283664	0.0560816	-0.0747618	0.62145	-0.110408	0.465114
UBE3C	-0.169847	0.259119	0.208598	0.164163	-0.00445538	0.976556	0.332202	0.0240972	-0.0519875	0.731504	-0.0861772	0.569045	-0.0246878	0.870631	-0.0233217	0.877733	0.0649649	0.667966	-0.137482	0.362231	0.298834	0.0436568
SPIRE2	0.104698	0.488646	-0.208571	0.164219	0.0637616	0.67377	-0.17562	0.243035	-0.163014	0.279053	0.168575	0.262754	0.126078	0.403769	0.0273372	0.856885	-0.155067	0.303472	-0.0174943	0.908132	-0.141766	0.347319
CLCC1	0.0895802	0.553828	0.208466	0.164437	-0.0135055	0.929017	0.0567394	0.708005	-0.141581	0.347956	0.328376	0.0258776	-0.0704049	0.64197	0.0093339	0.95091	-0.0839409	0.57915	-0.163381	0.277957	0.201663	0.178961
FAM234B	0.0444817	0.769115	-0.208407	0.164559	0.165801	0.270805	0.0236137	0.876214	0.301392	0.0418022	-0.162559	0.280416	-0.242227	0.104823	0.194765	0.194607	-0.416843	0.00395407	-0.0449473	0.766766	0.214261	0.152756
CUTC	0.0237222	0.87565	0.208362	0.164653	-0.39815	0.00613667	0.298622	0.0438136	-0.094909	0.530392	0.147186	0.329004	0.293759	0.0475352	-0.225624	0.131642	0.509298	0.000300622	0.272104	0.0673398	0.195571	0.192732
CSRNP3	0.115112	0.446192	0.208339	0.1647	0.20047	0.181602	-0.113666	0.451962	-0.0579556	0.702033	-0.0983431	0.515551	-0.0935649	0.536257	0.192577	0.199766	-0.0108479	0.942959	0.0963095	0.524314	0.133425	0.376703
C8orf59	-0.145682	0.334024	-0.208257	0.16487	-0.336895	0.0220544	0.161438	0.283789	0.112127	0.458151	0.109613	0.468354	0.00621537	0.9673	0.0879597	0.56105	0.138888	0.357296	0.152229	0.312518	0.110847	0.46333
CACTIN	-0.0261821	0.862873	0.208189	0.165011	0.0937623	0.535394	-0.242157	0.104927	-0.240784	0.106973	-0.0434209	0.774476	0.348748	0.0175328	-0.241686	0.105625	0.192585	0.199748	-0.0609266	0.687518	-0.129988	0.389227
BLZF1	-0.159348	0.290153	0.208179	0.165033	-0.172835	0.250707	0.456283	0.00143713	-0.14402	0.33963	-0.12635	0.402747	0.16963	0.259735	-0.233035	0.119099	0.11835	0.433419	0.183151	0.223095	0.0834634	0.581318
LOC107053383	0.0162971	0.914395	0.208172	0.165046	0.445006	0.00194321	0.0945197	0.532087	-0.241338	0.106144	0.111158	0.462066	0.0277334	0.854833	-0.278389	0.0610149	0.140085	0.353126	-0.0707577	0.640299	-0.1844	0.219899
KAT7	-0.080171	0.596364	-0.208071	0.165257	0.12115	0.422539	0.185167	0.217953	0.284325	0.0554862	0.0856176	0.571566	-0.343668	0.0193641	0.164191	0.27555	-0.235806	0.114648	-0.15318	0.309467	0.313717	0.0337456
LRP4	0.266871	0.072994	0.207998	0.165408	-0.236529	0.113508	0.0101887	0.94642	-0.158293	0.293401	0.587494	1.76788e-05	-0.139302	0.355849	0.182455	0.224889	0.167111	0.266983	0.0013588	0.992849	0.140474	0.351778
VDAC3	0.0403579	0.790011	0.207662	0.166107	-0.25548	0.0865962	-0.201138	0.180119	-0.228991	0.125826	0.16541	0.27195	0.524934	0.000180157	-0.205619	0.170408	0.409585	0.00470356	0.428781	0.0029473	0.132418	0.380345
SEC14L5	0.0785035	0.60405	0.207651	0.166131	-0.215092	0.151134	-0.0758915	0.616174	0.369392	0.0115223	0.237266	0.112356	0.00824225	0.956645	-0.206133	0.169318	-0.00079415	0.995821	-0.0508873	0.736981	0.0470558	0.756153
MITF	-0.00603396	0.968254	-0.207522	0.1664	0.655437	7.68138e-07	-0.266623	0.0732712	-0.127943	0.396794	-0.178622	0.234947	-0.166497	0.268771	0.0883555	0.559282	-0.151781	0.313958	-0.149309	0.321997	-0.0382617	0.80069
AGAP1	-0.0190233	0.900141	-0.207441	0.166568	-0.185492	0.217131	-0.143203	0.342405	0.233592	0.118194	0.128842	0.393458	-0.36975	0.011436	0.499979	0.000403223	-0.224715	0.133245	-0.0118116	0.937901	0.217882	0.145774
LLGL2	-0.00367564	0.980658	0.20741	0.166633	0.314314	0.0333904	-0.179799	0.231826	0.305314	0.0390837	-0.094018	0.534276	0.209212	0.162899	-0.3798	0.00923061	-0.0262457	0.862543	0.125041	0.407679	0.244566	0.101409
SHISA6	0.0634893	0.675086	-0.207121	0.167237	0.747774	2.34893e-09	-0.151703	0.314211	-0.186345	0.214988	-0.0527442	0.727745	-0.188087	0.210654	0.0393382	0.795201	-0.167348	0.266294	-0.1704	0.257548	-0.468395	0.0010274
DDX31	0.261747	0.0788876	0.207061	0.167364	-0.0714455	0.637045	-0.17629	0.241213	-0.207563	0.166314	0.438078	0.00232724	0.0499192	0.741811	0.0930563	0.538484	-0.00364132	0.980839	0.234096	0.117379	0.321166	0.0295309
MKL1	0.191921	0.201331	0.206897	0.167708	-0.165333	0.272177	-0.126245	0.403143	0.274161	0.0652146	-0.157706	0.295218	0.0601968	0.691073	-0.124551	0.409531	-0.1844	0.219898	0.0652839	0.666431	-0.232901	0.119317
COL5A1	-0.0754036	0.618451	-0.206896	0.167711	-0.169235	0.260862	0.211413	0.158419	-0.12907	0.392614	-0.169779	0.25931	0.0559729	0.711778	0.110432	0.465017	0.098194	0.516191	0.296579	0.045347	0.16973	0.25945
CBSL	0.131148	0.384973	0.206854	0.167799	-0.101505	0.502073	-0.113922	0.45094	0.272329	0.0671051	-0.115465	0.444789	-0.0804108	0.595263	0.175828	0.242468	0.0798849	0.59768	-0.0111404	0.941424	0.170916	0.256086
TRA2A	0.107029	0.478968	0.206739	0.168041	-0.201662	0.178965	0.176694	0.240121	0.0502229	0.740294	0.0426076	0.778593	0.0842791	0.577616	-0.175336	0.243811	0.171848	0.253464	0.190655	0.204377	0.0748178	0.621188
SRC	-0.134532	0.37272	0.206705	0.168113	-0.0395338	0.794205	-0.0867664	0.566397	-0.0861781	0.569042	-0.0509966	0.736436	0.256088	0.0858236	-0.103086	0.495403	0.0621604	0.681522	0.0157848	0.917076	0.235759	0.114723
ARL13B	-0.211964	0.157311	-0.206686	0.168151	-0.322391	0.0288814	-0.103102	0.495336	0.134233	0.373793	0.216668	0.148088	-0.14043	0.351929	0.168948	0.261685	0.144911	0.336617	-0.120224	0.42612	-0.140645	0.351184
LOC112531456	0.254245	0.0881822	0.20663	0.168269	-0.0381234	0.801396	-0.156199	0.299913	-0.170878	0.256195	0.161361	0.284024	0.26895	0.0707043	-0.158101	0.293995	0.0702469	0.64272	0.102838	0.496444	0.224264	0.134048
SNAPC4	-0.0294077	0.846172	0.206472	0.168603	-0.210464	0.160339	-0.0414608	0.784408	0.20039	0.181779	-0.14868	0.324065	0.158128	0.29391	-0.143878	0.34011	-0.0150103	0.921131	0.381776	0.00884307	0.159203	0.290597
DCAF6	-0.0612117	0.686131	-0.206231	0.16911	0.00219793	0.988434	-0.0860644	0.569553	0.237428	0.112104	-0.297807	0.0444199	-0.246032	0.0993128	0.324264	0.0279119	-0.210053	0.161175	-0.0571874	0.705803	0.159978	0.288225
NACAD	0.309173	0.0365518	-0.206197	0.169183	0.583877	2.04866e-05	0.0135232	0.928924	-0.00935773	0.950784	-0.268052	0.0716869	-0.0206871	0.891458	-0.0191073	0.899703	-0.339239	0.0210898	-0.165992	0.270243	-0.200913	0.180618
TBC1D22B	-0.131087	0.385194	0.206075	0.169441	-0.0979325	0.517315	0.0121858	0.935938	0.0133524	0.92982	0.0172451	0.909435	0.0560107	0.711592	0.109297	0.469643	0.143179	0.342484	-0.0494865	0.743973	0.282078	0.0575297
RIC8A	0.0109705	0.942315	0.206065	0.169461	-0.214611	0.152072	-0.0998298	0.509192	0.223006	0.136302	0.0159323	0.916303	0.0744024	0.623132	-0.00956435	0.949699	0.0339907	0.822558	-0.122581	0.417039	0.352877	0.0161545
CLINT1	0.196636	0.190271	-0.206038	0.169519	0.0270134	0.858563	-0.0183626	0.903593	0.116102	0.442264	-0.0720036	0.634409	-0.629635	2.7614e-06	0.606119	8.04113e-06	-0.362431	0.0133133	-0.380326	0.00912599	-0.29223	0.0487573
COPS2	0.0217683	0.885822	-0.206033	0.16953	-0.113802	0.451419	-0.022884	0.880011	0.109259	0.4698	0.0179012	0.906005	-0.0991968	0.511895	0.161845	0.282562	-0.0257442	0.865145	0.1354	0.369615	-0.144475	0.338088
SRSF2	0.0301221	0.842481	0.205993	0.169615	-0.261575	0.0790916	0.574746	2.94931e-05	0.119188	0.430147	-0.250437	0.0932162	0.0493564	0.744623	-0.0788839	0.602293	0.0168435	0.911535	0.0512606	0.735121	0.0911228	0.546993
AUP1	-0.022056	0.884322	-0.205955	0.169695	-0.0749541	0.62055	-0.195769	0.192273	-0.190002	0.20596	0.239386	0.109087	0.30069	0.0423045	-0.151555	0.31469	0.0175178	0.908009	0.202911	0.17623	-0.210669	0.159922
TSPAN2	0.0214093	0.887692	-0.205845	0.169927	0.158236	0.293575	-0.253677	0.0889197	-0.01786	0.90622	-0.0781698	0.605593	0.224449	0.133719	-0.146194	0.332311	0.0398999	0.792341	0.344748	0.0189618	0.0228364	0.880259
KLHDC3	-0.244069	0.102128	-0.205766	0.170095	-0.198425	0.186191	0.105531	0.485177	0.429068	0.00292621	-0.163369	0.277995	0.104536	0.489324	-0.292917	0.0482049	-0.00854912	0.955033	0.0852685	0.573141	0.0285014	0.850858
ECE2	-0.05426	0.720235	-0.205755	0.170118	0.347691	0.0179014	0.0428576	0.777327	-0.0642058	0.671625	-0.0918113	0.543956	-0.088303	0.559517	0.100039	0.5083	-0.180818	0.229148	-0.25795	0.0834909	0.146223	0.332213
TERB2	-0.0649826	0.667881	-0.205553	0.170547	-0.124895	0.408229	-0.192921	0.19895	-0.193286	0.198083	0.108147	0.474359	-0.122403	0.417717	0.319639	0.0303573	-0.119073	0.430594	-0.165632	0.271299	-0.163043	0.278966
FOXP4	-0.269495	0.0701136	0.205532	0.170593	-0.0763892	0.613856	-0.0698597	0.644557	0.180165	0.230861	-0.125633	0.405443	0.156352	0.299435	-0.0796907	0.598574	0.00748543	0.960623	0.170591	0.257007	0.465384	0.00111808
HOMER3	0.101569	0.501804	0.205493	0.170674	-0.0466322	0.758281	0.0963422	0.524173	-0.190076	0.205782	0.0636519	0.6743	0.0153354	0.919429	-0.138695	0.357968	0.127275	0.399283	-0.149032	0.322907	-0.0721862	0.633548
SPINK7	0.158597	0.292463	0.205482	0.170699	0.0595388	0.694284	0.0482266	0.750279	0.0449154	0.766927	-0.0501776	0.740521	-0.015437	0.918897	-0.132218	0.381074	-0.0583493	0.700103	0.322822	0.0286558	0.149304	0.322015
LRRC8A	-0.00200627	0.989442	0.205432	0.170805	0.180286	0.230542	-0.123368	0.414029	0.313182	0.0340667	0.0926902	0.540091	0.00523744	0.972443	-0.188298	0.210132	-0.0876362	0.562497	0.0280821	0.853027	0.16862	0.262625
TBXAS1	-0.0239766	0.874327	-0.20528	0.171128	-0.0925393	0.540753	-0.104538	0.489316	-0.0597195	0.693402	-0.0562248	0.710537	-0.00815656	0.957095	0.152289	0.312324	0.149227	0.322268	0.374982	0.0102374	0.145466	0.334751
SLC39A10	-0.110067	0.4665	-0.205274	0.171141	0.0434408	0.774375	-0.0240823	0.873778	0.115829	0.443345	-0.111038	0.462554	-0.0695973	0.645804	-0.00119743	0.993698	0.1144	0.44903	-0.150468	0.318214	0.091905	0.543543
LOC101748752	0.015335	0.919431	0.205245	0.171204	-0.0259788	0.863928	-0.304869	0.0393843	0.102847	0.496408	0.11087	0.463236	0.643288	1.42402e-06	-0.62054	4.21833e-06	0.0859319	0.57015	0.337272	0.0218966	0.0468537	0.757168
CLSTN1	0.347968	0.0178041	0.205107	0.171496	-0.0739372	0.625312	-0.0515978	0.733443	-0.103878	0.492077	0.111473	0.46079	-0.248412	0.0959818	0.540231	0.000106505	-0.0542388	0.720339	-0.171869	0.253406	0.232305	0.120292
MGAT4B	0.328049	0.0260345	0.204964	0.171804	-0.230312	0.123598	0.169811	0.25922	-0.226923	0.129375	0.0133405	0.929882	0.24594	0.0994432	-0.16879	0.262138	0.331696	0.0243265	0.122433	0.417605	0.0570381	0.706536
NKTR	-0.0490287	0.746262	-0.204949	0.171834	0.22799	0.127535	0.130915	0.385825	0.0241779	0.873281	-0.178182	0.236119	-0.346438	0.0183466	0.194111	0.196139	-0.206424	0.168702	-0.227714	0.128008	-0.238497	0.110449
TMEM136	-0.0492219	0.745295	-0.204893	0.171955	0.432801	0.0026633	-0.137564	0.36194	-0.106276	0.482082	-0.0866972	0.566708	0.0615898	0.684292	-0.0484232	0.749293	-0.169398	0.260398	0.184393	0.219917	0.0784048	0.604506
LOC419677	-0.00759291	0.960058	0.204864	0.172017	-0.179941	0.23145	-0.0812935	0.591215	-0.103008	0.495732	-0.0892157	0.555448	0.464509	0.00114572	-0.257771	0.0837129	0.114945	0.446856	0.124909	0.408177	0.21867	0.144288
ZNF687	0.0280892	0.852991	-0.204829	0.172092	-0.090868	0.548119	-0.0522535	0.730182	0.48901	0.000563703	-0.256728	0.085016	-0.155394	0.302442	0.129641	0.390506	-0.12012	0.426523	0.0430675	0.776264	0.13831	0.359319
LOC107057564	0.359718	0.0140731	0.204769	0.172221	-0.0441929	0.770574	-0.00839118	0.955862	-0.0583697	0.700003	-0.0275491	0.855788	0.446254	0.00188031	-0.22481	0.133077	0.0398921	0.792381	0.170652	0.256834	-0.0718828	0.634979
HDAC11	-0.111326	0.461387	0.204728	0.172308	-0.247578	0.0971389	-0.0346008	0.819425	-0.186721	0.214047	0.034864	0.818075	0.553128	6.70154e-05	-0.323589	0.0282583	0.428171	0.00299269	0.332458	0.0239817	0.35772	0.0146559
CEP89	-0.201032	0.180355	-0.20472	0.172326	-0.106791	0.47995	-0.348571	0.017594	0.252028	0.091087	0.184084	0.220706	-0.163995	0.276132	0.341815	0.020071	-0.109621	0.468321	-0.0887647	0.557457	0.323358	0.0283775
RAP1GAP2	0.0315672	0.835027	-0.204577	0.172632	0.0664238	0.660955	-0.119169	0.430219	0.0738855	0.625555	0.0242478	0.872917	-0.475387	0.000841646	0.55863	5.46751e-05	-0.0079706	0.958073	-0.27122	0.06827	-0.196018	0.191697
NPR1	-0.201747	0.178776	0.204548	0.172693	-0.292439	0.0485885	-0.173359	0.249251	0.20488	0.171982	0.299538	0.0431402	0.124258	0.410645	-0.229885	0.124314	-0.00388037	0.979581	0.28796	0.052305	0.186195	0.215363
NDUFB2	0.250844	0.0926685	0.204544	0.172703	-0.165697	0.271108	0.0157344	0.91734	-0.23746	0.112053	-0.0303125	0.841499	0.698292	6.84634e-08	-0.318127	0.0311943	0.420626	0.00360652	0.324235	0.0279264	0.217827	0.14588
WDSUB1	-0.0554955	0.714132	-0.204541	0.172709	0.185491	0.217134	-0.204727	0.17231	-0.203952	0.173974	-0.22988	0.124323	0.233956	0.117606	-0.21922	0.143256	-0.0664601	0.660781	0.193163	0.198376	-0.363042	0.013147
RGS12	-0.200179	0.182249	-0.204512	0.172771	-0.0224048	0.882506	-0.181665	0.226936	0.00154993	0.991843	-0.0351373	0.816673	-0.256336	0.0855101	0.211649	0.157943	0.0450846	0.766073	0.0255177	0.866321	-0.263661	0.076644
LOC107052984	0.25949	0.0815996	0.20446	0.172883	-0.0265222	0.861109	-0.13519	0.370364	-0.122846	0.416025	0.0260938	0.863331	0.45408	0.00152561	-0.411105	0.00453702	0.040245	0.790585	0.244119	0.102055	0.0330715	0.827282
URM1	0.109606	0.46838	0.204254	0.173325	-0.110566	0.464472	-0.0444727	0.769161	-0.256128	0.0857728	0.142348	0.345322	0.616752	5.01291e-06	-0.317828	0.031362	0.193011	0.198735	0.276372	0.0629908	0.235904	0.114493
IDH3A	-0.153538	0.308325	0.204235	0.173365	-0.35677	0.01494	0.152256	0.31243	-0.169651	0.259677	0.0256637	0.865563	-0.0254243	0.866806	0.0935038	0.536524	0.0167623	0.91196	0.0728968	0.6302	-0.016656	0.912516
GGACT	0.378547	0.00948393	0.203959	0.173959	-0.359683	0.0140832	-0.096709	0.522587	0.0215878	0.886762	0.207335	0.16679	0.120865	0.423639	0.294542	0.0469194	0.128627	0.394253	0.0216399	0.88649	0.300481	0.0424554
NECAB3	0.102483	0.497942	0.203942	0.173996	0.0408299	0.787612	0.36184	0.0134757	-0.101155	0.503557	0.157186	0.296832	-0.00150167	0.992097	-0.189321	0.207621	0.000602049	0.996832	-0.233742	0.11795	-0.0382734	0.80063
GRK6	-0.0830338	0.583271	-0.203923	0.174037	0.298667	0.0437803	-0.144554	0.337822	0.020953	0.890071	-0.102037	0.499822	0.0325062	0.83019	-0.0906483	0.549091	0.0275391	0.855839	-0.160957	0.285247	0.0764643	0.613506
SERBP1	-0.12801	0.396544	-0.203923	0.174037	0.0307463	0.83926	-0.143754	0.340532	0.114664	0.447976	-0.264913	0.0752034	0.0590679	0.696585	0.226093	0.130819	-0.0320788	0.832391	0.118953	0.431062	0.427094	0.00307422
RNF219	-0.0623664	0.680523	-0.203905	0.174076	0.289315	0.0511575	-0.0740677	0.6247	-0.073787	0.626017	0.309765	0.0361758	-0.255798	0.086192	-0.0446775	0.768127	-0.375103	0.0102109	-0.083099	0.582975	-0.0420633	0.781351
CBX6	0.202616	0.176872	-0.203799	0.174305	0.604137	8.76497e-06	-0.294483	0.0469654	-0.000573278	0.996983	-0.220986	0.13998	-0.18155	0.227237	0.0591268	0.696298	-0.30572	0.0388107	-0.126636	0.401677	-0.344381	0.0190978
POLA1	-0.341765	0.0200906	-0.203765	0.174379	0.0449294	0.766856	-0.265102	0.0749878	-0.0198789	0.895675	-0.216243	0.148905	-0.066956	0.658404	0.139424	0.355423	-0.217613	0.146286	0.208961	0.163415	0.164593	0.27436
MAEL	-0.263343	0.0770133	0.203749	0.174413	-0.134444	0.373036	-0.1199	0.427374	0.0317386	0.834144	0.0182856	0.903995	0.159672	0.28916	-0.224278	0.134022	0.0441815	0.770631	0.0345212	0.819834	0.32968	0.0252585
OLA1	0.137523	0.362087	0.203747	0.174417	-0.193141	0.198427	0.134883	0.371463	0.0778555	0.607048	-0.0894172	0.554552	0.248408	0.0959878	-0.210705	0.159849	0.128068	0.396329	0.212796	0.155649	0.252416	0.0905736
ADSS1	0.0365577	0.809397	-0.203737	0.17444	0.400153	0.00586126	0.0117169	0.938398	-0.15955	0.289535	-0.0817648	0.589059	-0.195166	0.193673	0.315635	0.0326155	-0.261566	0.0791022	-0.223349	0.135685	-0.138983	0.356964
PDGFRL	-0.2152	0.150922	-0.203698	0.174524	-0.228682	0.126351	0.293756	0.0475376	0.257459	0.0841018	-0.00267137	0.985942	-0.103894	0.49201	-0.0297527	0.844389	-0.268429	0.0712733	-0.00895719	0.952888	0.0996518	0.509951
SSRP1	-0.17131	0.254977	0.203614	0.174704	-0.149492	0.321398	0.0978835	0.517525	-0.0966673	0.522767	-0.224123	0.134298	0.275372	0.0639888	-0.155835	0.301055	0.0878663	0.561468	0.178053	0.236466	0.415136	0.00412017
PRICKLE1	-0.10676	0.48008	-0.203546	0.174852	-0.0577871	0.702859	-0.174527	0.246028	-0.133703	0.375699	0.160408	0.286916	0.121246	0.422168	-0.196649	0.19024	-0.142606	0.344441	-0.0276131	0.855456	-0.221597	0.138858
MAP7D2	-0.201669	0.178949	-0.203474	0.175009	0.00083689	0.995596	-0.141124	0.34953	-0.0395299	0.794225	-0.0489005	0.746904	-0.344715	0.0189741	0.411695	0.00447389	-0.123796	0.412401	-0.325555	0.0272592	0.0626814	0.678996
COL4A3BP	0.0216319	0.886532	-0.203462	0.175034	0.0463274	0.759814	0.0181371	0.904771	-0.0490283	0.746264	0.0568447	0.707487	-0.233311	0.11865	0.312905	0.0342336	0.0557663	0.712797	0.083816	0.579716	0.143233	0.3423
BORCS8	0.00277742	0.985384	-0.203366	0.175243	0.206776	0.167962	-0.307814	0.0374278	0.0445257	0.768893	-0.387996	0.0077134	0.192602	0.199708	-0.166332	0.26925	-0.207497	0.166451	0.122322	0.418028	-0.162156	0.281625
CROT	-0.41486	0.00414763	-0.203326	0.175329	-0.156837	0.29792	-0.204166	0.173514	0.268505	0.0711901	0.0175044	0.908079	0.157479	0.295922	-0.10534	0.485971	-0.0708233	0.639988	0.0682172	0.652376	0.3708	0.0111863
KMT2A	-0.0577568	0.703007	-0.203274	0.175441	0.320826	0.0297135	-0.0347111	0.818859	0.0303078	0.841522	-0.0683191	0.65189	0.0771347	0.610391	-0.123343	0.414125	-0.374289	0.0103897	0.0268444	0.859439	0.149674	0.320804
PPP1R17	0.0425823	0.778721	0.20322	0.175559	-0.124282	0.410554	-0.145452	0.334796	-0.154864	0.304116	-0.155811	0.301131	0.101636	0.501517	0.0385884	0.799023	0.226881	0.129448	-0.0235938	0.876318	-0.295547	0.0461386
WIZ	-0.149136	0.322566	-0.203115	0.175787	-0.00430602	0.977342	-0.146781	0.330352	-0.135381	0.369682	-0.170766	0.256511	-0.0112701	0.940743	-0.00907006	0.952296	-0.223461	0.135482	-0.118597	0.432452	-0.341449	0.0202133
GABRA3	-0.196552	0.190464	0.203069	0.175886	-0.224662	0.133341	0.0488055	0.747379	0.293967	0.0473714	0.0464209	0.759344	0.0204036	0.892936	-0.139248	0.356037	-0.198953	0.184996	0.083045	0.58322	0.253342	0.0893574
LOC121110898	-0.177717	0.237364	0.202989	0.176062	-0.241743	0.105541	0.458955	0.00133596	0.135219	0.370262	-0.149355	0.321848	0.0288501	0.849054	-0.264612	0.0755479	-0.0923459	0.541604	-0.226839	0.12952	-0.297309	0.0447941
MAN1A2	-0.0905893	0.549352	0.202954	0.176136	-0.0242381	0.872967	0.0443547	0.769757	0.27077	0.0687474	-0.160264	0.287355	0.0368623	0.807839	-0.124816	0.408529	0.00410607	0.978394	-0.0965853	0.523122	0.276531	0.0628335
MAP3K14	0.210255	0.160764	0.202863	0.176334	-0.0813203	0.591092	-0.0567908	0.707752	-0.0716058	0.636287	-0.0130422	0.931446	0.464274	0.00115325	-0.220175	0.141477	-0.00717804	0.962239	0.184933	0.218545	0.32731	0.0263927
FAM104A	-0.217198	0.147075	0.20282	0.176429	-0.30321	0.0405233	-0.0237293	0.875613	0.392804	0.00692779	0.0304752	0.840659	-0.0502787	0.740016	-0.143216	0.342361	-0.0207304	0.891232	0.288889	0.0515156	0.114162	0.449981
UBOX5	-0.126691	0.401468	0.202755	0.176571	-0.00139875	0.992639	-0.0936101	0.536059	-0.0479304	0.751763	-0.0342961	0.820989	0.066176	0.662144	0.0381189	0.801419	-0.0785606	0.603786	0.119435	0.429185	0.31289	0.0342425
ZC2HC1A	-0.23349	0.118359	-0.202719	0.17665	0.301121	0.0419953	-0.365657	0.0124556	-0.150849	0.316976	-0.0207728	0.891011	0.00670809	0.964709	-0.0224241	0.882405	0.0524281	0.729315	0.0168253	0.911631	0.160341	0.287119
RBMS3	-0.118903	0.431257	0.202717	0.176652	-0.401562	0.00567387	0.543636	9.44155e-05	-0.105194	0.486579	0.140721	0.350923	0.0492678	0.745066	-0.151546	0.314719	0.265426	0.0746197	0.0167154	0.912206	-0.00504647	0.973447
H2AFY	0.400799	0.00577472	0.202658	0.176783	-0.121699	0.420424	-0.254506	0.087846	-0.179585	0.23239	0.0751916	0.619441	0.106154	0.482589	0.0960458	0.525456	-0.0840017	0.578874	0.0925335	0.540779	-0.210622	0.160018
RECQL	-0.228187	0.127197	-0.202593	0.176923	-0.0232326	0.878197	-0.138556	0.358455	-0.158204	0.293675	-0.156783	0.298088	0.157308	0.296452	-0.0948618	0.530597	-0.0374192	0.804992	-0.0912361	0.546493	-0.240091	0.108018
CHD9	-0.166602	0.268462	-0.202511	0.177102	0.161431	0.283813	0.0459306	0.761811	-0.0651349	0.667147	-0.251581	0.0916811	-0.178881	0.234256	0.201388	0.179568	-0.171114	0.255528	-0.0831984	0.582522	0.0789887	0.601809
MLLT6	-0.115315	0.445384	-0.202484	0.177161	-0.247268	0.0975728	-0.25002	0.0937811	0.232333	0.120246	0.406345	0.00507647	-0.0872692	0.564141	0.0391122	0.796353	-0.0694669	0.646424	0.12829	0.395504	0.148335	0.325202
CDH10	-0.238912	0.109812	-0.202446	0.177244	0.0090534	0.952383	0.172674	0.251156	-0.0365423	0.809477	0.117612	0.436311	-0.213463	0.154328	0.24416	0.101995	-0.137711	0.361424	0.0191809	0.899318	0.191774	0.201684
NAA35	-0.201275	0.179816	-0.202398	0.17735	-0.0155444	0.918334	-0.344746	0.0189624	-0.0564503	0.709427	0.196817	0.189855	-0.0341167	0.821911	0.0682781	0.652085	-0.0885841	0.558262	-0.0220097	0.884564	0.226352	0.130367
LOC121111528	0.165345	0.272143	0.202293	0.17758	0.0695662	0.645952	-0.0490273	0.746269	-0.209173	0.162978	-0.0241661	0.873342	0.193969	0.196473	-0.133932	0.374874	0.0805471	0.594637	0.261244	0.0794861	0.00311329	0.983617
PELI3	-0.109702	0.467988	0.202168	0.177852	0.0100257	0.947276	-0.121897	0.419661	-0.0780404	0.606192	-0.105554	0.485083	0.110066	0.466505	-0.0180295	0.905334	-0.127838	0.397185	-0.0617867	0.683336	0.0247549	0.870282
LOC101750948	-0.0440577	0.771257	0.202167	0.177855	-0.0634923	0.675071	-0.0771409	0.610362	0.0698157	0.644766	-0.00732974	0.961441	0.137837	0.360978	-0.139609	0.354779	-0.115643	0.444081	0.1498	0.320393	0.277606	0.0617757
ETNPPL	0.411009	0.00454741	0.202155	0.177881	-0.0471987	0.755435	0.0325597	0.829915	-0.134847	0.371591	0.0688351	0.64943	0.383987	0.00842622	-0.213227	0.154794	0.0307611	0.839183	0.23104	0.122382	0.259362	0.0817547
TMEM198	-0.188115	0.210585	-0.202151	0.177891	-0.147949	0.326475	-0.0860583	0.56958	-0.0707277	0.64044	-0.17251	0.251613	0.184118	0.220618	0.0476217	0.753312	-0.0481066	0.75088	0.248527	0.0958227	0.142517	0.344745
USP42	-0.0516472	0.733197	0.202083	0.178039	-0.168844	0.261983	-0.119591	0.428576	-0.123887	0.412052	0.121929	0.419538	0.246486	0.0986713	-0.188305	0.210116	0.175923	0.242212	0.256513	0.0852874	0.200654	0.181191
TGFB1I1	0.135879	0.367906	0.201914	0.17841	-0.0894546	0.554386	-0.0639565	0.672829	-0.0303927	0.841085	0.0931202	0.538204	0.279795	0.0596668	-0.329301	0.0254369	-0.00524635	0.972396	0.133775	0.37544	0.28212	0.0574908
THUMPD2	-0.158763	0.291951	-0.201882	0.178481	-0.0151505	0.920397	-0.194468	0.195302	0.52063	0.000207944	0.0176182	0.907484	-0.165442	0.271856	0.0438303	0.772406	-0.1828	0.223999	0.0987445	0.51383	0.15112	0.316097
CZH18ORF25	0.0450196	0.766401	0.201868	0.178511	-0.0603329	0.690409	-0.184207	0.220391	0.270977	0.0685274	0.0542275	0.720395	0.0909576	0.547723	-0.167877	0.264764	0.06674	0.659439	0.209562	0.162179	0.264205	0.0760153
SFXN4	-0.104006	0.491542	0.201866	0.178515	-0.198214	0.186668	-0.143807	0.340351	-0.173336	0.249316	-0.114882	0.447106	0.535016	0.000127771	-0.193144	0.198421	0.298569	0.0438531	0.427501	0.00304321	0.316861	0.0319099
ITGA11	-0.0475906	0.753468	0.20172	0.178835	-0.143942	0.339894	-0.0460949	0.760984	0.121497	0.421199	-0.0970122	0.521278	0.0759994	0.615671	0.0211525	0.889031	0.0260748	0.86343	0.130174	0.388544	0.31802	0.0312543
SMAP2	0.156043	0.300403	-0.201699	0.178883	0.00889115	0.953235	-0.0946311	0.531602	-0.226063	0.130872	0.331929	0.0242205	-0.168703	0.262386	0.389622	0.00743947	0.138869	0.357362	-0.00628521	0.966933	0.15495	0.303844
CYTH1	-0.095476	0.527927	0.201457	0.179416	-0.229555	0.124871	0.260733	0.0800975	0.234888	0.116109	-0.167008	0.267281	0.18564	0.21676	-0.399699	0.00592268	-0.0997217	0.509653	0.0623068	0.680812	0.270469	0.0690675
SEPSECS	-0.0523193	0.729856	0.201295	0.179774	-0.0809893	0.592609	0.105934	0.483504	-0.102746	0.496833	-0.0319797	0.832902	0.0362646	0.810898	0.0760294	0.615531	-0.0555387	0.713919	0.213093	0.155061	0.378245	0.00954577
XPA	0.0401211	0.791215	-0.201214	0.179952	0.161456	0.283737	-0.296666	0.0452808	-0.0946164	0.531666	0.156004	0.300524	0.135589	0.368942	-0.0155751	0.918174	0.300074	0.0427495	0.140162	0.352857	0.0797835	0.598147
SLC4A1	0.133236	0.377386	0.201181	0.180026	-0.0976679	0.518453	-0.0290603	0.847967	-0.0557364	0.712944	-0.0403879	0.789859	0.0953018	0.528684	-0.0598459	0.692785	0.0170084	0.910673	0.191451	0.202458	0.199969	0.182717
DSN1	-0.0971879	0.52052	0.201085	0.180238	-0.183671	0.22176	-0.131784	0.38265	0.141468	0.348346	-0.092652	0.540259	0.385497	0.00815126	-0.355995	0.0151755	0.217971	0.145606	0.0639868	0.672682	0.262979	0.0774374
DYNC2LI1	-0.0972063	0.520441	0.200967	0.180498	-0.268655	0.0710255	0.245253	0.100422	0.420482	0.00361926	-0.013387	0.929638	0.0819718	0.588113	-0.326472	0.0268032	-0.0608067	0.688101	0.11193	0.458945	0.0962715	0.524479
CCDC77	0.046137	0.760772	0.200691	0.18111	-0.0537214	0.7229	-0.206686	0.168151	0.147035	0.329506	0.138522	0.358575	0.091952	0.543336	-0.0536173	0.723416	0.0900384	0.551793	0.0575217	0.704161	0.323993	0.0280505
DNAAF1	-0.02601	0.863766	0.200623	0.181262	-0.122429	0.41762	-0.142025	0.346432	0.061645	0.684024	-0.104641	0.488888	0.500603	0.000395465	-0.333149	0.0236726	0.0204013	0.892949	0.373034	0.0106703	0.190412	0.204966
NFKB1	0.0324728	0.830363	0.200597	0.181318	-0.143915	0.339984	-0.157505	0.295842	-0.179535	0.232523	0.543398	9.5218e-05	0.136034	0.367358	0.0362437	0.811005	0.166718	0.268127	0.0934121	0.536926	0.240239	0.107793
PPM1L	0.102137	0.499401	0.200455	0.181634	0.122099	0.418886	0.107967	0.475101	0.0304989	0.840537	-0.108559	0.472668	0.299212	0.0433785	-0.264876	0.0752455	0.0325671	0.829877	0.0236283	0.876138	-0.0140693	0.926061
MDN1	-0.313132	0.0340964	-0.200453	0.181638	-0.208475	0.164418	-0.197341	0.188655	-0.0334811	0.825176	-0.219928	0.141936	0.028706	0.849799	0.123369	0.414027	0.333544	0.0234972	0.0133188	0.929995	-0.041385	0.784793
ZNF821	-0.0149603	0.921393	0.200356	0.181854	-0.22932	0.125269	-0.0364822	0.809784	0.060511	0.689542	-0.162022	0.282029	0.194636	0.19491	0.135956	0.367633	0.0818566	0.58864	0.096288	0.524407	0.33349	0.0235212
TMEM259	-0.0261335	0.863125	0.200299	0.18198	-0.169854	0.259099	0.0174578	0.908322	-0.00810537	0.957364	-0.169765	0.259351	0.187205	0.21284	-0.301104	0.0420077	-0.0876179	0.562579	0.0635483	0.674801	-0.00554247	0.970839
AKAP10	0.0861511	0.569163	0.200166	0.182279	-0.12593	0.404327	-0.133909	0.374957	-0.121782	0.420103	0.496415	0.000450144	0.133504	0.376417	-0.0429507	0.776855	0.0598777	0.69263	0.119197	0.430109	0.422378	0.00345493
DAAM1	0.0182726	0.904063	0.200162	0.182286	-0.257741	0.0837504	0.0778226	0.607201	0.198826	0.185284	0.13518	0.370399	0.2505	0.0931308	-0.155822	0.301098	0.147182	0.329016	-0.105638	0.484733	0.25692	0.0847758
SCYL2	-0.163487	0.277642	-0.200151	0.182311	-0.191617	0.202061	0.316861	0.0319098	0.230085	0.123979	0.318943	0.0307401	-0.268495	0.0712012	0.174885	0.245046	-0.0603838	0.690161	0.038376	0.800107	0.0598973	0.692534
LYPD6	0.0125051	0.934263	0.200066	0.1825	-0.142874	0.343525	-0.0602255	0.690933	0.10377	0.49253	0.0126686	0.933405	-0.0545633	0.718735	-0.085779	0.570838	0.0530433	0.726261	0.151474	0.314952	-0.186027	0.215786
TBC1D12	0.156957	0.297544	-0.200035	0.182571	0.13721	0.363191	0.0947354	0.531148	-0.243239	0.103336	0.411954	0.00444634	-0.258672	0.0825995	0.307544	0.0376041	0.161712	0.282963	-0.205341	0.170999	-0.349453	0.0172908
PLCL2	0.207594	0.16625	-0.199981	0.18269	0.14068	0.351064	-0.0769474	0.611261	-0.0741937	0.62411	0.0342314	0.821322	-0.0450675	0.76616	0.289559	0.0509529	0.123456	0.413694	-0.160646	0.28619	-0.0418431	0.782468
SAP30BP	-0.0872095	0.564409	-0.199975	0.182704	-0.337933	0.0216229	0.552175	6.93931e-05	-0.154759	0.304447	-0.15574	0.301354	0.0638159	0.673508	-0.0103959	0.945332	0.27936	0.0600819	0.0229962	0.879427	-0.146202	0.332284
ZEB1	-0.153754	0.307636	-0.199911	0.182847	-0.161955	0.282229	-0.0656121	0.664852	0.0212976	0.888274	0.182776	0.22406	-0.14464	0.337533	0.229576	0.124835	0.292003	0.048941	-0.191179	0.203113	-0.00112817	0.994063
ARHGEF18	-0.0843689	0.577209	0.199846	0.182993	-0.244324	0.101759	-0.229208	0.125457	0.262871	0.0775633	-0.210057	0.161168	0.181975	0.22613	-0.0256877	0.865438	0.0458991	0.761969	0.155353	0.30257	0.0342142	0.82141
INO80C	0.0481153	0.750836	-0.199805	0.183085	0.160845	0.285585	-0.37636	0.00994014	-0.0884642	0.558797	0.212725	0.155792	0.0917046	0.544426	-0.189278	0.207726	0.0321194	0.832182	0.0936006	0.536101	-0.175003	0.24472
PHTF2	-0.210664	0.159933	-0.199472	0.183829	-0.0714406	0.637067	-0.0874038	0.563538	-0.0595746	0.69411	0.00538801	0.971651	0.216138	0.149107	-0.00403553	0.978765	0.129055	0.392667	0.2109	0.159453	0.259839	0.0811758
SNRK	-0.0969664	0.521476	0.199397	0.183998	-0.0567456	0.707975	0.00405793	0.978647	-0.241633	0.105705	0.210648	0.159964	0.109083	0.47052	-0.0371346	0.806447	0.211032	0.159188	0.265452	0.0745907	0.0845115	0.576563
RAB22A	0.0114036	0.940042	-0.199391	0.184012	0.0579977	0.701826	0.150098	0.319418	-0.19661	0.190331	-0.205784	0.170058	-0.143725	0.34063	0.170787	0.256451	-0.152473	0.311733	0.0652145	0.666765	-0.204373	0.17307
NMS	0.126635	0.401679	0.19929	0.184239	-0.147148	0.329129	-0.0731688	0.628921	0.0512523	0.735162	-0.0763519	0.61403	0.193408	0.197797	-0.287545	0.0526602	0.00963639	0.949321	0.491163	0.000528298	0.0113052	0.940559
IL1R1	0.0363726	0.810345	-0.199154	0.184545	-0.167109	0.266988	-0.0383358	0.800312	0.196005	0.191726	-0.23571	0.114801	-0.105868	0.483777	0.035844	0.813051	-0.143937	0.339909	0.262207	0.0783441	-0.187228	0.212783
TNR	-0.11668	0.439981	-0.198948	0.185008	0.104898	0.487813	-0.289992	0.0505918	0.206137	0.169309	0.0691027	0.648156	-0.204935	0.171865	0.176533	0.240556	-0.325866	0.0271037	-0.174206	0.246909	-0.204701	0.172365
ADGRL2	-0.186419	0.214803	-0.198811	0.185318	-0.0707577	0.640299	0.365398	0.0125227	0.223026	0.136264	-0.0715066	0.636755	-0.450564	0.00167685	0.232285	0.120325	-0.220006	0.141791	-0.0771641	0.610254	0.275544	0.0638166
C6orf89	-0.0728319	0.630506	0.198733	0.185492	-0.234715	0.116386	0.138181	0.359771	0.305352	0.0390578	-0.226912	0.129394	0.00208979	0.989003	-0.105709	0.484435	0.0532457	0.725258	-0.263552	0.0767706	-0.107815	0.475725
EIF4ENIF1	0.147341	0.32849	-0.198668	0.185641	0.053027	0.726342	0.0190072	0.900226	-0.213005	0.155236	0.253733	0.0888466	-0.178077	0.236401	0.116924	0.439016	-0.155824	0.301089	-0.216154	0.149076	-0.212557	0.156126
COPS7B	0.0957237	0.526852	0.198423	0.186195	-0.213542	0.154171	0.0255084	0.866369	0.14431	0.338645	-0.140107	0.353047	0.149184	0.322408	-0.16872	0.262339	0.00160509	0.991553	0.174293	0.24667	0.166779	0.267947
PIGC	-0.0126168	0.933677	0.198401	0.186243	-0.131367	0.384173	-0.110497	0.464751	-0.108022	0.474872	-0.0698607	0.644553	0.410682	0.00458288	-0.262345	0.078181	-0.0187646	0.901492	0.140384	0.352089	0.168161	0.263946
TSC2	-0.0906912	0.548901	0.19838	0.186292	0.00244484	0.987134	-0.212482	0.156275	0.200536	0.181454	0.185084	0.218164	-0.145181	0.335709	0.114431	0.448905	-0.139781	0.354179	-0.0674869	0.655864	0.296886	0.0451143
MARK1	0.301896	0.0414443	0.198287	0.186503	-0.0608307	0.687984	-0.0237552	0.875479	-0.23869	0.110153	0.298352	0.0440141	-0.161056	0.284945	0.213202	0.154844	0.0868483	0.566029	0.154615	0.304902	-0.0669948	0.658219
SAFB2	0.0429735	0.77674	0.198244	0.1866	0.00375838	0.980223	-0.359054	0.0142644	0.171801	0.253596	-0.00225039	0.988158	0.153073	0.309808	-0.210232	0.16081	-0.110537	0.464587	0.0400026	0.791819	0.315127	0.0329119
RPL12	0.050095	0.740933	0.19822	0.186655	-0.26026	0.0806665	-0.0198535	0.895807	-0.0874778	0.563206	-0.0148722	0.921855	0.81337	6.47239e-12	-0.640442	1.63924e-06	0.546886	8.40571e-05	0.355315	0.0153846	0.0122511	0.935595
DLGAP4	-0.129216	0.392073	-0.198028	0.18709	0.0464312	0.759292	-0.0478436	0.752198	0.255296	0.086832	-0.205572	0.170507	-0.262336	0.0781922	0.342287	0.0198889	-0.222119	0.137906	-0.173134	0.249877	0.382667	0.00867297
CRY1	-0.164312	0.275191	0.198001	0.187152	-0.281678	0.0578999	0.201668	0.178951	0.293024	0.0481194	0.0491931	0.74544	0.0118936	0.937471	-0.188799	0.208901	-0.0551419	0.715876	0.232856	0.119391	0.061569	0.684393
CHCHD3	0.0219148	0.885058	-0.197855	0.187484	-0.102872	0.496301	-0.362333	0.0133401	0.0390496	0.796672	0.109561	0.468567	-0.0218064	0.885623	0.401298	0.00570862	-0.170355	0.257674	-0.0258055	0.864827	0.370294	0.0113059
LOC101750765	0.196662	0.190212	0.197828	0.187544	-0.014339	0.924648	-0.119931	0.427254	-0.00730041	0.961595	-0.000759737	0.996002	0.0624659	0.68004	-0.0617182	0.683668	-0.115236	0.445698	-0.0639737	0.672746	0.219432	0.142859
SLC38A7	-0.0469775	0.756546	-0.197727	0.187774	-0.195528	0.192831	-0.0599192	0.692427	-0.186118	0.215557	0.312359	0.0345653	0.0157232	0.917398	0.128135	0.396079	0.0663205	0.66145	0.0685645	0.650719	0.0594242	0.694844
UBE2T	-0.151774	0.313984	0.197724	0.187781	-0.174578	0.245886	-0.213008	0.155229	0.17783	0.237061	-0.0694024	0.64673	0.407967	0.00488665	-0.377071	0.00978981	0.066394	0.661098	0.136305	0.366393	0.105211	0.486509
TWF2	-0.19276	0.199331	-0.197646	0.187959	-0.243247	0.103324	0.335138	0.0228012	-0.146903	0.329946	0.284096	0.0556924	-0.2316	0.121454	0.11279	0.455478	0.218383	0.144827	-0.405068	0.00523032	-0.119494	0.428954
PARVA	-0.303582	0.0402658	-0.197643	0.187965	-0.187278	0.212659	0.51532	0.000247542	-0.12936	0.391541	-0.291126	0.0496549	-0.240709	0.107085	0.131971	0.381969	-0.160143	0.287722	-0.154857	0.304138	-0.488482	0.000572715
ENOX2	-0.187356	0.212465	-0.197344	0.188649	-0.193735	0.197023	-0.152018	0.313197	-0.0485199	0.748809	0.0598257	0.692883	-0.246688	0.0983864	0.483246	0.000669239	-0.010831	0.943048	0.0678016	0.65436	0.310117	0.0359534
TDH	0.0949773	0.530095	0.197263	0.188834	-0.292918	0.0482047	-0.22369	0.135073	0.454345	0.0015147	-0.103682	0.492899	0.0423109	0.780096	0.0940987	0.533924	-0.0345003	0.819941	0.10464	0.488892	0.0848781	0.574905
KHDRBS3	-0.107873	0.475485	-0.197229	0.188912	-0.26921	0.0704218	-0.181963	0.226161	0.390348	0.00732002	-0.0853419	0.57281	0.0907541	0.548623	-0.0744067	0.623112	0.302659	0.0409074	0.24758	0.0971373	-0.211248	0.15875
LOC121108209	-0.175575	0.243157	0.197182	0.189018	-0.12233	0.418	-0.102402	0.498284	0.0974401	0.519433	-0.0238667	0.874899	0.11684	0.439347	-0.200434	0.181681	0.0347268	0.818779	0.0237822	0.875338	0.317589	0.0314966
UXS1	-0.119845	0.427589	-0.197102	0.189203	0.172346	0.252071	0.0557415	0.712918	0.0557567	0.712843	0.0916602	0.544622	-0.0835652	0.580855	-0.127428	0.398713	-0.235157	0.115679	-0.0889368	0.55669	0.0593101	0.695402
ADD1	0.109187	0.470093	-0.197093	0.189222	0.32941	0.0253855	-0.207893	0.165625	-0.121181	0.422417	0.138379	0.359078	-0.441209	0.00214607	0.542212	9.93128e-05	-0.356251	0.0150975	-0.0707896	0.640147	0.0965393	0.52332
MLLT1	-0.116914	0.439056	0.197055	0.18931	-0.0414992	0.784213	-0.0558511	0.712378	-0.152547	0.311496	-0.155361	0.302546	0.191748	0.201745	0.0514813	0.734023	0.232733	0.119591	0.111437	0.460938	0.179808	0.231801
KIAA1191	-0.113775	0.451524	-0.197011	0.189411	0.0280781	0.853049	0.207189	0.167096	-0.130655	0.386776	-0.165247	0.272431	0.0340715	0.822143	-0.0691475	0.647943	0.29058	0.0501046	-0.0641549	0.671871	-0.279434	0.0600111
ATP5F1AW	-0.0935436	0.53635	-0.196915	0.18963	-0.0313719	0.836033	0.0704635	0.641693	-0.161007	0.285095	-0.256693	0.0850608	0.131618	0.383256	0.145065	0.3361	0.0539109	0.721962	0.276209	0.0631531	0.442561	0.00207179
RBM23	-0.119042	0.430714	-0.196902	0.18966	-0.265804	0.0741918	-0.0015394	0.991899	0.150138	0.31929	-0.133572	0.376173	0.0690696	0.648314	0.236316	0.113843	-0.0411743	0.785862	0.0520098	0.731394	0.39679	0.00633015
RGS8	0.0124781	0.934405	0.196836	0.189812	0.0181883	0.904504	0.193828	0.196805	-0.299443	0.0432095	-0.176369	0.240999	0.250697	0.0928653	-0.139277	0.355936	0.13208	0.381575	0.345677	0.0186216	0.0423864	0.779713
AHDC1	-0.113044	0.454458	-0.196739	0.190034	-0.084811	0.575208	-0.100759	0.505235	-0.0534334	0.724327	-0.120107	0.426572	0.0754005	0.618465	0.0625179	0.679788	0.180536	0.229885	0.29064	0.0500544	0.154059	0.306666
AKAP6	-0.142403	0.345135	0.196738	0.190036	-0.103616	0.493176	-0.0953342	0.528543	0.0263207	0.862154	-0.0449217	0.766895	-0.199718	0.18328	0.266012	0.0739573	-0.280691	0.0588207	-0.150392	0.318461	0.219939	0.141915
ICE2	-0.15807	0.29409	-0.196556	0.190455	-0.142923	0.343357	-0.134989	0.371083	0.776949	2.18329e-10	-0.170577	0.257047	-0.407902	0.00489417	0.152239	0.312484	-0.320086	0.0301137	-0.193395	0.197828	-0.163982	0.27617
SDK2	0.0277028	0.854991	-0.19649	0.190606	0.206406	0.16874	-0.013259	0.930309	0.242377	0.104602	-0.494108	0.000483093	-0.329503	0.025342	0.251886	0.0912754	-0.455227	0.00147896	-0.309109	0.0365928	-0.184934	0.218543
PAICS	-0.245461	0.100126	-0.196489	0.19061	0.373471	0.0105719	-0.377434	0.00971369	0.0412335	0.785562	-0.391454	0.00714113	-0.071049	0.638919	-0.0947582	0.531048	-0.272689	0.0667304	-0.0751261	0.619747	-0.422966	0.00340534
OSBPL11	0.18534	0.217515	-0.19642	0.190768	0.536422	0.000121687	-0.0723089	0.632969	-0.227404	0.128543	0.158016	0.294258	-0.249199	0.0948992	0.203523	0.174902	-0.227773	0.127907	-0.208905	0.163531	0.0113028	0.940571
ZNF212	0.295083	0.0464973	0.196418	0.190774	-0.217435	0.146624	0.0563843	0.709752	-0.102727	0.496914	0.253218	0.089519	-0.142823	0.343701	0.20959	0.162122	-0.0249099	0.869477	0.0856245	0.571535	0.234187	0.117232
LOC420992	-0.0260098	0.863767	-0.196413	0.190785	0.314953	0.0330138	-0.367507	0.0119855	-0.0926036	0.540471	-0.199392	0.184011	-0.13544	0.369471	0.134544	0.372677	0.0882716	0.559657	-0.202569	0.176977	-0.290719	0.0499896
ARL3	-0.106978	0.479178	0.196342	0.190948	-0.230533	0.123228	-0.0349002	0.817889	0.00902	0.952559	-0.053627	0.723368	0.564368	4.40501e-05	-0.648228	1.11158e-06	0.194475	0.195286	0.434169	0.00257227	0.183094	0.22324
DNAJB12	0.0627573	0.678628	0.196294	0.191059	-0.111066	0.462442	-0.0252915	0.867495	-0.0106109	0.944203	0.215962	0.149447	0.333838	0.0233676	-0.33275	0.0238506	0.302896	0.0407422	0.079962	0.597325	0.00446018	0.976531
LOC121107773	0.0688656	0.649285	0.196279	0.191094	-0.0875268	0.562987	-0.106991	0.479123	-0.0909147	0.547913	-0.0415707	0.78385	0.434739	0.00253521	-0.210598	0.160065	0.109255	0.469816	0.917272	3.31808e-19	0.210825	0.159606
AIMP2	0.121138	0.422583	0.196263	0.191129	0.132057	0.381658	-0.264911	0.0752065	0.183377	0.222514	-0.119482	0.429	0.375966	0.0100243	-0.325423	0.0273254	0.0728441	0.630448	0.328634	0.0257539	0.00495739	0.973916
XPO6	-0.0415716	0.783846	-0.196128	0.191441	-0.235161	0.115674	0.557995	5.59844e-05	-0.0688815	0.649209	0.240229	0.107809	-0.360047	0.013979	0.142351	0.345314	0.01749	0.908154	-0.298125	0.0441828	-0.19602	0.191691
NEGR1	0.161632	0.283205	0.196093	0.191522	-0.0520782	0.731053	-0.0431299	0.775948	0.423127	0.00339181	-0.306285	0.0384338	-0.075541	0.617809	-0.00350346	0.981564	-0.270181	0.0693757	0.0754406	0.618277	0.222583	0.137064
RTF1	0.0182147	0.904366	0.196042	0.191641	-0.333302	0.0236047	0.0187484	0.901577	0.197278	0.188799	-0.143961	0.339828	0.531563	0.0001439	-0.255819	0.0861653	0.25857	0.0827251	0.392322	0.00700337	0.403656	0.00540523
LYRM7	-0.15824	0.293564	0.196	0.191737	-0.149653	0.320873	0.0652868	0.666417	0.265265	0.0748025	-0.0143953	0.924353	-0.010432	0.945143	-0.254339	0.0880614	0.107274	0.477955	0.00969399	0.949018	0.005701	0.970005
CAMK1	-0.0449549	0.766728	0.195953	0.191847	-0.223385	0.135618	0.242332	0.104668	0.175684	0.24286	-0.202903	0.176248	0.335352	0.0227094	-0.273078	0.0663268	0.050322	0.7398	0.00139124	0.992679	0.235936	0.114443
TVP23A	-0.0842778	0.577622	-0.195886	0.192002	-0.130656	0.386774	-0.148199	0.32565	0.0588488	0.697657	0.355574	0.0153045	0.0632945	0.676028	-0.294403	0.0470281	0.0298517	0.843877	0.000165053	0.999131	-0.347073	0.0181197
UBA5	0.188087	0.210653	0.195845	0.192096	0.0463544	0.759678	-0.196964	0.189518	-0.0658149	0.663878	0.227858	0.127762	0.198397	0.186254	-0.230555	0.123191	0.299975	0.0428216	0.0346274	0.819289	0.112926	0.45493
RBM3	0.213206	0.154836	-0.195672	0.192496	0.166425	0.268979	0.0823273	0.586491	-0.00368317	0.980619	0.227254	0.128801	0.227015	0.129215	-0.333135	0.0236788	-0.102465	0.498016	-0.103764	0.492554	-0.233338	0.118606
MTIF2	0.114708	0.447799	0.195662	0.19252	-0.254076	0.0884011	0.461517	0.00124496	-0.295188	0.0464162	-0.219521	0.142693	0.295665	0.0460473	-0.243675	0.102699	0.137541	0.362021	0.0690638	0.648341	-0.16979	0.259279
LOC107054229	-0.077771	0.60744	0.195556	0.192767	0.0209665	0.890001	0.0774048	0.609137	-0.186729	0.214028	-0.16067	0.286118	0.0786231	0.603498	-0.132982	0.378302	0.21271	0.155822	-0.290429	0.050229	-0.057702	0.703277
MAP2K3	-0.256384	0.0854501	0.195446	0.19302	-0.294358	0.0470632	0.256849	0.0848641	-0.00259235	0.986358	0.0563696	0.709825	0.0174659	0.90828	-0.0356036	0.814283	0.15395	0.307013	-0.119191	0.430134	-0.0714427	0.637058
RC3H2	0.301655	0.0416153	0.19539	0.193151	0.340135	0.0207306	0.201301	0.179761	-0.205349	0.170981	-0.17013	0.258313	-0.101718	0.501171	0.163386	0.277944	-0.160289	0.287279	-0.143574	0.341143	0.21578	0.149798
GPD1L2	-0.167745	0.265147	0.195362	0.193216	-0.103137	0.495189	0.50909	0.00030263	-0.261634	0.0790213	0.143424	0.341652	0.06212	0.681718	-0.187684	0.21165	0.354085	0.0157689	-0.202506	0.177113	0.0405152	0.789211
SEC31B	0.0328655	0.828342	-0.195307	0.193345	0.600443	1.0277e-05	-0.139977	0.353501	-0.189662	0.206788	-0.0392496	0.795653	-0.0606849	0.688694	0.0485452	0.748682	-0.16412	0.27576	0.0549362	0.716892	0.147076	0.329369
FOXN3	-0.0263195	0.86216	-0.195264	0.193444	-0.202823	0.176421	0.367112	0.0120846	0.165313	0.272236	-0.0251815	0.868066	-0.281933	0.0576637	0.135173	0.370426	-0.204689	0.172391	0.0815751	0.589927	-0.26402	0.0762285
SUMF2	-0.0495199	0.743806	0.195255	0.193464	-0.267357	0.0724539	-0.0409562	0.78697	-0.208879	0.163584	0.402228	0.00558716	0.20218	0.177827	-0.0506728	0.738051	0.313159	0.0340805	0.125042	0.407673	0.118499	0.432834
CCDC25	0.0428839	0.777193	0.195234	0.193514	-0.199279	0.184264	0.107835	0.475644	-0.303249	0.0404962	0.11593	0.442944	0.360677	0.0138003	-0.156818	0.297978	0.199131	0.184597	0.112353	0.457239	0.390489	0.00729689
CDIN1	-0.228174	0.127219	-0.195196	0.193603	-0.167661	0.26539	-0.185689	0.216637	0.694976	8.37783e-08	-0.0757048	0.617045	-0.18938	0.207476	0.0128842	0.932275	-0.334488	0.0230829	0.0147478	0.922506	-0.0330073	0.827613
ATP2A2	0.198537	0.185936	0.195172	0.193658	0.24782	0.0968028	-0.0526442	0.728242	-0.112851	0.455232	-0.00856022	0.954974	0.23121	0.1221	-0.251226	0.0921558	-0.119988	0.427033	-0.119079	0.430568	0.298281	0.0440666
CHGB	0.166987	0.267342	0.19516	0.193686	-0.0593796	0.695062	-0.0287766	0.849434	-0.145604	0.334287	0.176308	0.241165	0.204651	0.172472	0.0315823	0.834949	0.195191	0.193614	0.386628	0.00795047	0.357746	0.0146483
SLCO5A1	0.0158178	0.916903	0.195153	0.193703	0.00737142	0.961222	-0.264252	0.0759611	-0.0815955	0.589833	0.126769	0.401175	0.275706	0.0636545	-0.323973	0.0280607	0.0817078	0.58932	0.0254342	0.866754	0.195523	0.192842
ACBD7	0.314395	0.0333424	0.195141	0.19373	-0.188991	0.20843	-0.31827	0.0311146	-0.0995258	0.510489	-0.0659873	0.66305	0.664968	4.6405e-07	-0.356243	0.0150999	0.294774	0.046738	0.392507	0.00697424	-0.118285	0.433673
MRPL37	0.0239439	0.874497	-0.195041	0.193964	-0.0699102	0.644317	-0.00678041	0.964329	-0.129683	0.390348	-0.120977	0.423204	0.114607	0.448203	0.0876167	0.562585	0.0901825	0.551154	-0.131606	0.383299	-0.0896717	0.553421
DTD2	0.1832	0.222967	0.194986	0.194092	0.0354282	0.815182	-0.0881579	0.560164	-0.00473407	0.97509	0.23411	0.117357	0.223646	0.135151	-0.284599	0.0552413	0.215734	0.149887	0.153487	0.308487	0.0871778	0.564551
CCNK	-0.0454819	0.764071	0.194969	0.194132	-0.130728	0.386511	0.271024	0.0684776	0.207882	0.165648	-0.248495	0.0958674	0.00720957	0.962073	-0.261958	0.0786377	0.0205199	0.89233	-0.0780074	0.606345	-0.0700451	0.643677
CD44	0.108817	0.471609	0.194925	0.194234	-0.0753321	0.618784	-0.103515	0.493602	0.351969	0.0164493	-0.0735816	0.626981	0.0511167	0.735838	-0.0314813	0.835469	0.137098	0.363584	0.158135	0.293887	0.0712229	0.638097
CALB2	0.0370953	0.806648	0.194919	0.194248	-0.167002	0.267299	-0.0716919	0.63588	-0.0606469	0.688879	-0.146905	0.32994	0.571249	3.38129e-05	-0.380352	0.00912085	0.135397	0.369626	0.222566	0.137095	-0.114214	0.44977
USP5	-0.00169959	0.991056	-0.194915	0.194258	-0.047009	0.756388	0.194983	0.194099	0.109583	0.468477	-0.262547	0.0779439	0.0662823	0.661634	-0.13734	0.362732	-0.066316	0.661472	-0.0719335	0.634739	-0.149458	0.32151
CSRNP1	0.0977293	0.518188	-0.194887	0.194323	0.0206624	0.891587	0.13823	0.359599	-0.153361	0.308888	-0.192952	0.198875	0.0809999	0.59256	0.155361	0.302548	0.085715	0.571127	0.0729755	0.62983	-0.214423	0.152439
MIGA1	0.0645723	0.669858	0.194784	0.194563	-0.125282	0.406767	-0.285386	0.0545418	0.0738727	0.625615	-0.0286256	0.850215	-0.0107184	0.943639	0.317264	0.0316807	-0.0556971	0.713137	0.119088	0.430535	0.469084	0.00100759
EXD1	-0.129443	0.391237	0.194701	0.194758	-0.05511	0.716034	-0.0208991	0.890352	-0.035633	0.814133	-0.00659019	0.965329	0.132295	0.380792	-0.100955	0.504406	0.0522532	0.730184	0.050659	0.738119	0.0870477	0.565134
PAPD4	0.0260918	0.863341	0.19468	0.194807	-0.185421	0.217311	0.134405	0.373173	-0.173428	0.249061	-0.0744508	0.622906	-0.135986	0.367528	0.265945	0.0740321	0.021838	0.885458	0.024857	0.869751	0.195515	0.192861
UMAD1	0.18784	0.211264	0.194613	0.194963	-0.290996	0.0497618	0.0656187	0.664821	-0.0415109	0.784153	0.224726	0.133227	0.308784	0.0368012	-0.322967	0.0285804	0.307182	0.0378405	-0.0411303	0.786086	-0.219256	0.143189
SLC35G2	0.0918324	0.543863	0.194606	0.194979	-0.117263	0.437683	-0.282357	0.0572729	-0.196298	0.19105	0.00385712	0.979704	0.464823	0.00113572	-0.109283	0.469702	0.0815211	0.590173	0.211611	0.158019	0.171177	0.25535
NAPEPLD	0.0521616	0.730639	-0.194523	0.195174	0.494204	0.000481683	-0.437768	0.00234588	0.0156553	0.917754	-0.203984	0.173907	-0.197471	0.188358	0.126007	0.404036	-0.208002	0.165399	-0.25909	0.0820872	-0.378689	0.00945491
NFATC3	-0.256486	0.0853209	-0.194517	0.195188	-0.181077	0.22847	0.329369	0.0254048	0.119874	0.427477	-0.104801	0.488218	-0.0814104	0.59068	0.0740767	0.624658	0.12473	0.408853	-0.00655332	0.965523	0.0595201	0.694376
GOLM1	0.016123	0.915306	-0.194338	0.195606	0.0885236	0.558532	0.377864	0.00962436	-0.113104	0.454218	0.0130933	0.931178	-0.101579	0.501762	0.0213322	0.888094	-0.241201	0.106348	-0.249739	0.0941624	-0.227383	0.12858
LOC100858260	0.282439	0.0571977	0.194287	0.195727	-0.270452	0.0690857	0.109969	0.466903	-0.272949	0.0664608	0.609475	6.93983e-06	-0.0304531	0.840773	0.0902532	0.550841	0.378024	0.00959124	-0.0768927	0.611515	-0.0149353	0.921524
SPON1	0.10627	0.482106	0.194253	0.195807	-0.11976	0.427919	0.140693	0.351018	-0.30063	0.0423478	0.0484293	0.749263	0.0866092	0.567103	0.00411067	0.97837	0.203594	0.174749	-0.0740304	0.624875	0.128525	0.394633
ULK4	0.0776228	0.608127	0.194229	0.195862	-0.161647	0.28316	-0.136475	0.365791	-0.126656	0.401601	0.560783	5.04402e-05	-0.0312067	0.836885	0.032324	0.831129	0.0271387	0.857914	0.0747647	0.621436	0.0322641	0.831437
COL4A1	0.193296	0.19806	-0.194185	0.195965	0.488527	0.000571941	-0.111738	0.459721	-0.285776	0.0541984	-0.0217132	0.886109	-0.131742	0.382804	-0.0216374	0.886503	-0.0158759	0.916599	-0.138603	0.358292	-0.701106	5.75623e-08
EVC	-0.123378	0.413991	0.194062	0.196254	-0.245161	0.100555	0.37867	0.00945874	0.0797569	0.598269	-0.182955	0.223598	0.167383	0.266194	-0.162415	0.280847	0.0171102	0.91014	-0.0330025	0.827637	0.245028	0.100745
PTPRF	-0.0512879	0.734985	0.193944	0.196531	-0.0800398	0.596968	-0.234797	0.116255	0.155468	0.302208	-0.159058	0.291045	-0.101462	0.502254	0.0109611	0.942365	-0.0665239	0.660475	0.0436177	0.773481	-0.119999	0.426989
SRPX	-0.131138	0.385009	-0.193908	0.196617	0.108215	0.474079	0.171091	0.255593	0.139327	0.35576	-0.377044	0.00979553	-0.400831	0.00577048	0.350137	0.0170583	-0.161658	0.283125	-0.0664882	0.660646	0.149876	0.320144
SERPINF1	0.003389	0.982167	0.193873	0.196698	-0.0768169	0.611867	-0.116693	0.439928	-0.0138459	0.927232	-0.0634773	0.675144	0.173494	0.248877	-0.176738	0.240002	0.00611479	0.967829	0.244561	0.101416	0.304908	0.0393581
LOC101750362	0.164041	0.275995	0.193754	0.19698	-0.168742	0.262275	0.0100921	0.946928	-0.161301	0.284205	0.890281	1.24606e-16	-0.0195593	0.897343	-0.102033	0.499841	0.144776	0.337072	-0.0826365	0.58508	0.0167761	0.911888
VGLL2	-0.107256	0.478027	0.193736	0.197021	-0.108654	0.472276	-0.0636065	0.674519	-0.0795813	0.599078	-0.0480668	0.751079	0.305536	0.038934	-0.055081	0.716177	0.0543042	0.720016	-0.0823113	0.586563	0.309049	0.0366311
SLC24A2	0.161222	0.284445	0.193665	0.197189	0.0801114	0.596638	-0.207134	0.167212	0.256762	0.0849737	-0.274567	0.0648015	-0.229479	0.125	0.237237	0.112401	-0.195432	0.193055	0.0801074	0.596657	0.0677942	0.654396
WASHC4	-0.128569	0.39447	-0.193655	0.197212	-0.225834	0.131274	0.0248652	0.869709	0.0484399	0.74921	0.233885	0.117721	-0.0572778	0.705359	0.132037	0.38173	-0.259983	0.0810006	-0.0834103	0.581559	0.270113	0.0694488
PSMB5	0.161461	0.283721	0.193615	0.197308	0.0237889	0.875303	0.102974	0.495873	-0.172616	0.251317	-0.0511262	0.735791	0.585586	1.91124e-05	-0.613891	5.70219e-06	0.337734	0.0217052	0.254634	0.0876807	-0.00878574	0.953789
FNBP4	-0.0394548	0.794607	-0.193583	0.197382	-0.248103	0.0964101	0.19453	0.195156	0.449447	0.00172762	-0.210996	0.159261	-0.103642	0.493069	-0.00611511	0.967827	-0.0693927	0.646776	-0.104743	0.488459	0.154666	0.304743
DCLK2	-0.0694057	0.646715	0.19358	0.197389	-0.187124	0.213042	0.0291496	0.847506	0.419596	0.00369837	-0.181161	0.22825	0.0296978	0.844673	-0.129579	0.390733	-0.0792454	0.600625	0.0858718	0.57042	0.13688	0.364356
TLK2	-0.275935	0.0634254	0.193575	0.1974	-0.300611	0.0423615	0.235738	0.114757	-0.00613379	0.967729	0.0766288	0.612741	0.0164052	0.913829	0.0309159	0.838385	0.211713	0.157814	0.14544	0.334837	0.230651	0.12303
YAF2	-0.0766295	0.612738	0.193472	0.197646	-0.502854	0.000368631	0.18244	0.224928	0.254178	0.0882694	-0.0402212	0.790707	0.132362	0.380551	-0.121278	0.422046	0.0977875	0.517938	-0.164954	0.273293	0.0211051	0.889278
AASS	0.263737	0.0765558	0.193287	0.198081	-0.185827	0.216288	-0.0352563	0.816063	-0.129376	0.391482	-0.0179206	0.905903	0.213659	0.153941	0.0463008	0.759948	0.0579943	0.701843	0.463031	0.00119383	0.23987	0.108352
CARS2	-0.190704	0.204258	0.193135	0.198441	-0.115542	0.444482	0.404057	0.00535498	-0.151191	0.315866	-0.131094	0.385168	-0.102806	0.496582	0.0882963	0.559546	0.0500971	0.740923	-0.143196	0.342426	-0.229302	0.125298
HIBADH	-0.00911912	0.952038	-0.193122	0.198471	-0.232538	0.11991	0.00038192	0.99799	-0.115442	0.444881	0.280031	0.0594434	0.012101	0.936383	0.145534	0.334522	0.0407276	0.788132	0.2581	0.0833055	0.305079	0.039242
BMP2K	0.20731	0.166842	0.193034	0.19868	-0.0492399	0.745205	-0.244104	0.102076	0.207472	0.166503	0.661651	5.54136e-07	-0.0264528	0.861469	-0.170694	0.256715	-0.0349737	0.817512	-0.1284	0.395097	-0.137688	0.361503
LYSMD1	0.154729	0.304541	0.193022	0.198709	-0.274775	0.0645911	0.354257	0.0157147	-0.219394	0.14293	0.446945	0.00184631	0.234683	0.116437	-0.331402	0.0244606	0.328976	0.0255909	0.033336	0.825922	0.0548243	0.717445
OTUD7A	0.0518044	0.732415	-0.192995	0.198774	0.253207	0.089533	-0.130205	0.388429	0.110686	0.463981	0.0295894	0.845233	-0.397851	0.00617876	0.338172	0.0215244	-0.273733	0.065653	-0.064532	0.670052	0.0988084	0.513556
SLC10A7	0.0796874	0.598589	0.19297	0.198833	-0.11081	0.463481	-0.131954	0.382034	0.4393	0.00225497	-0.0802376	0.596058	-0.0320809	0.83238	-0.0675669	0.655482	0.0532186	0.725392	0.00457392	0.975933	0.160238	0.287434
EDIL3	0.200967	0.180498	0.192962	0.198851	0.401792	0.00564388	-0.173269	0.249501	0.00573946	0.969803	0.0352338	0.816179	-0.118955	0.431054	0.215765	0.149827	-0.18459	0.219417	-0.0806599	0.594119	0.225834	0.131274
FARS2	-0.253609	0.0890081	0.192924	0.198942	-0.230404	0.123443	-0.0237046	0.875742	0.420491	0.00361847	-0.145375	0.335054	0.105015	0.487324	-0.325008	0.0275344	-0.123484	0.413588	0.094448	0.5324	0.051336	0.734746
TMEM161A	0.221538	0.138968	-0.192918	0.198957	0.605808	8.15114e-06	-0.145906	0.333276	-0.274141	0.0652353	-0.170744	0.256574	-0.0606142	0.689039	0.105507	0.485275	-0.0152892	0.919671	-0.0858139	0.570681	-0.288676	0.0516957
MXRA8	-0.108712	0.472041	-0.192871	0.199067	-0.0383949	0.80001	-0.0941507	0.533697	-0.173526	0.248788	-0.185017	0.218333	0.112583	0.456311	-0.0988904	0.513205	0.256827	0.0848922	0.205118	0.171473	-0.241908	0.105295
SEC13	-0.212142	0.156955	0.192841	0.19914	-0.344823	0.0189342	-0.122271	0.418227	0.153531	0.308349	0.0409949	0.786774	0.263384	0.0769658	-0.319379	0.0305	0.360697	0.0137948	0.124482	0.409794	-0.0225496	0.881752
PARK7	0.197411	0.188495	0.192728	0.199408	0.0220752	0.884223	-0.0983304	0.515606	-0.105954	0.483417	0.0169191	0.91114	0.565473	4.22352e-05	-0.507853	0.000314796	0.196648	0.190243	0.501828	0.00038065	-0.0507291	0.73777
POM121C	-0.0984376	0.515146	-0.192695	0.199486	0.143938	0.339907	-0.0587294	0.698242	-0.109852	0.467376	-0.133813	0.375302	-0.038805	0.797919	0.276224	0.0631379	-0.0526683	0.728122	0.0674119	0.656223	0.325632	0.0272206
GTF2I	0.0798245	0.597958	0.192565	0.199796	0.0180847	0.905045	-0.118206	0.43398	0.128036	0.396449	0.515057	0.000249668	-0.266608	0.0732884	0.0767367	0.61224	-0.0552617	0.715285	-0.187102	0.213097	-0.0266586	0.860402
TP53BP1	0.146202	0.332283	0.19249	0.199974	0.263964	0.0762931	0.166593	0.268488	0.187691	0.211633	0.00536839	0.971754	-0.180337	0.230409	0.00184656	0.990283	-0.221258	0.13948	-0.228182	0.127205	0.0791086	0.601256
PGAP2	-0.0665614	0.660295	0.192489	0.199977	-0.151366	0.3153	-0.106953	0.479281	-0.0876324	0.562514	0.097905	0.517433	0.548436	7.94931e-05	-0.297932	0.0443268	0.33507	0.0228308	0.11284	0.455277	0.351938	0.0164595
LOC107050459	-0.158964	0.291334	-0.192454	0.20006	0.0723945	0.632566	0.417232	0.00391702	-0.0695206	0.646168	-0.139773	0.35421	-0.551328	7.15726e-05	0.412301	0.00440967	-0.0751757	0.619515	-0.30836	0.0370741	-0.315032	0.0329675
FAT1	-0.147171	0.329056	-0.192351	0.200306	0.0344616	0.82014	0.247919	0.0966655	-0.193953	0.196511	0.0118527	0.937685	-0.236682	0.113268	-0.0355453	0.814582	0.0266078	0.860665	-0.0327393	0.828991	-0.410966	0.00455203
LOC100859645	-0.110241	0.465791	0.192322	0.200374	-0.429982	0.00285979	0.219466	0.142796	-0.0705531	0.641268	-0.0175806	0.90768	0.371764	0.010961	-0.315733	0.0325587	0.47154	0.000939743	0.334784	0.0229545	-0.0849924	0.574388
ATXN7	-0.0837991	0.579793	-0.192313	0.200396	0.0423225	0.780037	-0.235086	0.115793	0.0843135	0.577461	-0.290324	0.050316	-0.248857	0.0953684	0.233193	0.118842	-0.168233	0.26374	-0.260328	0.0805839	-0.364225	0.0128305
NME7	0.131407	0.384026	0.192228	0.200599	-0.113563	0.452377	0.499779	0.000405724	-0.288111	0.052176	0.24651	0.0986378	-0.0704814	0.641608	0.10051	0.506296	0.0432327	0.775428	-0.161834	0.282597	-0.162882	0.279448
CTNS	0.01529	0.919666	0.19222	0.200618	0.0975158	0.519107	0.503129	0.000365463	-0.231033	0.122394	-0.0126317	0.933599	-0.134647	0.372308	0.0269532	0.858875	0.119396	0.429334	-0.173747	0.248176	0.0938055	0.535205
MAPK14	0.0400583	0.791535	0.192002	0.201139	0.306635	0.0382011	-0.012329	0.935186	0.113162	0.453985	-0.154722	0.304565	-0.136942	0.364138	0.117994	0.43481	-0.292796	0.0483017	-0.251472	0.0918273	0.0663024	0.661537
NRN1L	0.0670415	0.657995	0.191948	0.201268	-0.223571	0.135286	-0.184683	0.219179	0.2103	0.160672	-0.0624928	0.67991	0.614194	5.62548e-06	-0.358919	0.0143038	0.354114	0.0157599	0.309687	0.0362252	0.178135	0.236245
AFG3L2	0.381333	0.00892874	-0.191933	0.201304	0.336961	0.0220266	-0.183495	0.22221	-0.356601	0.0149911	-0.00727588	0.961724	0.201651	0.178988	0.163421	0.277838	0.236905	0.112919	0.153339	0.30896	0.193011	0.198737
LRRC55	0.234171	0.117259	-0.191908	0.201364	0.213101	0.155044	-0.105113	0.486916	-0.150819	0.317071	0.239077	0.10956	0.053089	0.726035	-0.0114223	0.939944	0.172327	0.252125	0.23301	0.119139	-0.0767655	0.612106
TOX3	-0.260001	0.0809794	-0.19184	0.201526	0.374803	0.0102764	-0.184164	0.220501	-0.157684	0.295285	-0.139186	0.356252	0.150556	0.317926	-0.125971	0.404172	0.162673	0.280073	0.0612029	0.686173	-0.122939	0.415668
SOGA3	-0.0234598	0.877015	-0.191756	0.201727	0.294505	0.0469483	-0.158142	0.293867	0.196749	0.190011	-0.23982	0.108427	-0.299997	0.0428051	0.238741	0.110074	-0.385374	0.00817336	-0.156296	0.299611	0.217923	0.145696
NPHP1	0.284311	0.055499	0.191746	0.201752	-0.21491	0.151486	-0.184395	0.219911	-0.215764	0.14983	0.450776	0.00166738	0.206002	0.169595	-0.0866308	0.567006	0.131424	0.383966	0.154638	0.304831	0.1424	0.345147
NLRP1L	0.251006	0.09245	0.191722	0.201808	-0.0725358	0.6319	-0.136903	0.364274	-0.169546	0.259975	-0.178222	0.236015	0.04403	0.771397	0.159616	0.289332	0.054943	0.716859	0.0686078	0.650513	-0.131254	0.384584
ACOT9	0.122988	0.415481	0.191704	0.201852	-0.119026	0.430775	-0.0854007	0.572544	-0.179106	0.233659	0.336697	0.0221376	0.00752683	0.960405	0.0445879	0.768579	0.172343	0.252078	-0.0086389	0.954561	0.372941	0.0106914
SERTAD4	0.018093	0.905002	-0.191684	0.201899	0.377712	0.00965593	-0.038976	0.797047	-0.226895	0.129423	-0.0867786	0.566342	-0.244834	0.101024	0.0605426	0.689387	-0.315429	0.0327355	-0.10197	0.500109	-0.431572	0.00274743
MAP2K6	0.154213	0.306177	0.191664	0.201948	-0.260724	0.0801082	-0.172516	0.251597	-0.152651	0.311161	0.14443	0.33824	-0.00793269	0.958272	0.184509	0.219623	-0.0210359	0.889639	0.134297	0.373562	0.266638	0.0732546
DUSP14	0.236789	0.1131	0.191586	0.202135	-0.0635371	0.674855	0.0907904	0.548462	-0.0187009	0.901825	-0.295108	0.0464783	-0.0704313	0.641845	0.120958	0.42328	-0.218315	0.144955	-0.01095	0.942423	-0.299016	0.0435229
ZNF451	-0.15405	0.306695	-0.191576	0.202158	-0.12071	0.424239	-0.183259	0.222817	0.198954	0.184995	-0.0800931	0.596723	-0.128525	0.39463	0.179033	0.233854	-0.290175	0.0504391	0.0774471	0.608941	0.364096	0.0128647
TP53I3	-0.112414	0.456993	-0.191565	0.202186	-0.18509	0.218147	0.505131	0.000343151	-0.201171	0.180047	-0.188637	0.209299	0.156785	0.298083	-0.0711666	0.638363	0.268727	0.0709478	0.040425	0.78967	-0.023871	0.874876
IL12RB1	0.0187582	0.901526	0.191475	0.202402	-0.110642	0.464163	-0.068159	0.652653	-0.0508297	0.737268	-0.033188	0.826683	0.329261	0.0254561	-0.311146	0.0353105	-0.0340548	0.822228	0.203993	0.173886	0.368948	0.01163
INVS	-0.110438	0.464992	0.191065	0.203389	0.267609	0.0721753	-0.239661	0.10867	0.182508	0.22475	-0.0255516	0.866145	0.00285823	0.984959	-0.163466	0.277705	-0.0892107	0.555471	0.164682	0.274097	0.218724	0.144185
SCN1A	-0.0541032	0.72101	-0.191057	0.203407	-0.00278281	0.985356	0.170292	0.257854	0.293583	0.0476747	-0.395574	0.0065075	-0.422278	0.00346346	0.419571	0.00370062	-0.109148	0.470255	-0.0536991	0.723011	0.0681021	0.652925
TPM1	-0.129899	0.389554	-0.191043	0.203441	0.110281	0.465631	-0.362041	0.0134204	-0.207195	0.167083	0.130276	0.388167	-0.161587	0.28334	0.266317	0.0736145	-0.0489738	0.746537	-0.185038	0.218279	-0.187284	0.212643
MTHFD1	-0.30545	0.0389921	0.190973	0.203609	-0.197833	0.187533	-0.170634	0.256885	0.409706	0.00469017	-0.137847	0.360946	0.0999248	0.508786	-0.249479	0.0945169	0.183272	0.222783	0.0806102	0.594347	0.0552493	0.715347
CDK17	0.387672	0.00776905	-0.190856	0.203891	0.304891	0.0393699	0.026722	0.860073	0.193085	0.19856	0.0259135	0.864267	-0.497473	0.000435721	0.371724	0.0109702	-0.582083	2.20264e-05	-0.185925	0.216043	0.0321055	0.832254
EIF2AK2	-0.0969267	0.521647	-0.190726	0.204206	-0.196524	0.190529	0.366097	0.0123424	-0.151611	0.31451	0.275939	0.0634218	-0.28375	0.0560038	0.203817	0.174266	0.0101695	0.946521	0.0243588	0.87234	0.039195	0.795931
ROMO1	0.195162	0.193682	0.190677	0.204324	0.0566601	0.708395	-0.137944	0.360606	-0.310458	0.0357393	-0.133065	0.378001	0.714749	2.41201e-08	-0.318219	0.0311429	0.313898	0.0336377	0.382453	0.0087136	0.136159	0.366913
CHAF1A	-0.286487	0.0535755	-0.190623	0.204456	-0.189249	0.207798	0.147369	0.328396	0.340525	0.0205761	-0.257189	0.0844384	0.0250487	0.868756	-0.1621	0.281793	0.0661823	0.662114	0.0679596	0.653605	-0.300211	0.0426502
CALCOCO2	0.162729	0.279906	0.190589	0.204537	-0.358162	0.0145253	-0.0693018	0.647209	-0.0813336	0.591032	0.358599	0.0143969	0.110683	0.463996	0.132009	0.381834	0.00758459	0.960102	-0.179552	0.232478	0.15144	0.315062
DSCR3	0.0421114	0.781107	-0.190559	0.204609	0.0539579	0.72173	-0.0600991	0.69155	0.17163	0.254077	0.269064	0.0705808	0.0400982	0.791332	-0.162119	0.281737	0.0777589	0.607496	0.245284	0.100378	-0.154388	0.305622
LPIN2	0.0845372	0.576447	0.190509	0.204731	0.133612	0.376026	-0.172123	0.252694	0.112444	0.456871	-0.380121	0.00916658	0.418273	0.0038194	-0.251134	0.0922792	-0.0030991	0.983692	0.196337	0.190959	0.160508	0.286611
PHF14	0.118171	0.434119	0.190443	0.204891	0.047073	0.756066	-0.371373	0.0110518	-0.087102	0.564891	0.0374917	0.804622	0.48801	0.000580858	-0.178838	0.234371	0.115855	0.443243	0.393246	0.00685917	0.355199	0.0154204
TNPO1	-0.265551	0.0744779	-0.190377	0.205051	-0.230155	0.123861	0.360026	0.0139848	-0.105032	0.487256	0.434058	0.00257958	-0.505221	0.000342188	0.258448	0.0828756	0.166461	0.268873	-0.374806	0.0102758	-0.411533	0.00449111
DELE	-0.111281	0.461569	-0.190323	0.205182	0.14245	0.344975	-0.26172	0.0789202	0.738302	4.74594e-09	0.0487195	0.74781	-0.427343	0.00305517	0.0453059	0.764958	-0.2776	0.0617824	-0.13125	0.3846	-0.0647221	0.669136
PROX1	-0.199231	0.184372	-0.19031	0.205213	0.0246556	0.870798	0.418764	0.00377406	0.0801526	0.596449	0.210432	0.160404	-0.229245	0.125395	-0.0213421	0.888042	-0.155718	0.301422	-0.234677	0.116447	0.0198651	0.895746
LOC101748284	-0.201914	0.17841	-0.190246	0.205367	-0.0131586	0.930836	0.0231411	0.878673	-0.129781	0.389987	-0.202999	0.17604	-0.00710683	0.962613	-0.156052	0.300376	-0.114907	0.447007	-0.0207929	0.890906	-0.518289	0.000224633
LRIG3	-0.211428	0.158388	-0.19023	0.205406	-0.0966786	0.522719	-0.117851	0.435373	0.191342	0.20272	-0.159318	0.290247	-0.0721739	0.633605	0.13685	0.364462	0.133523	0.376347	-0.0546591	0.718261	0.0125871	0.933833
VLDLR	-0.127741	0.397545	-0.190183	0.205521	-0.201113	0.180176	-0.0141265	0.925762	0.162848	0.279551	0.147652	0.327458	-0.0713471	0.63751	0.118331	0.433491	-0.198639	0.185706	-0.0400705	0.791473	0.314906	0.0330416
SLC6A17	0.34119	0.0203142	0.190101	0.20572	-0.0664122	0.661011	-0.158768	0.291935	-0.0524649	0.729132	0.0913741	0.545884	0.0676204	0.655226	0.11859	0.432478	0.0119525	0.937162	0.0577781	0.702903	0.107783	0.475857
PLXNA1	-0.0111741	0.941247	-0.190025	0.205904	-0.079178	0.600936	0.0734812	0.627453	0.00351209	0.981519	-0.173339	0.249308	-0.0665666	0.66027	0.226421	0.130248	0.139841	0.353971	-0.163342	0.278073	0.272129	0.0673134
PXK	-0.000336804	0.998228	-0.189873	0.206275	-0.127407	0.398792	0.202608	0.17689	-0.223226	0.135904	0.313622	0.0338022	-0.320174	0.0300659	0.431781	0.00273294	-0.234552	0.116646	-0.0923628	0.541529	-0.0128497	0.932455
LOC107054771	0.0917151	0.54438	0.189857	0.206315	-0.195054	0.193932	-0.215967	0.149437	-0.0829834	0.583501	0.347869	0.0178389	0.135277	0.370052	-0.0652435	0.666625	0.165596	0.271405	-0.118136	0.434254	-0.00501531	0.973611
VAPB	-0.0459214	0.761858	-0.189813	0.20642	0.0382055	0.800977	-0.207263	0.166942	-0.119903	0.427366	-0.108192	0.474173	0.460244	0.00128946	-0.246146	0.0991511	0.435574	0.0024817	0.157156	0.296926	-0.0781215	0.605817
MTA3	-0.151114	0.316116	0.189749	0.206576	-0.340119	0.0207369	0.383483	0.00851973	0.199517	0.183729	-0.15038	0.318501	-0.0370711	0.806771	-0.19656	0.190447	-0.173758	0.248147	0.236338	0.113809	-0.113	0.454633
PARP8	0.0458497	0.762218	-0.189746	0.206585	0.108114	0.474494	0.158548	0.292614	-0.10795	0.475169	-0.146012	0.33292	-0.194141	0.196068	0.116263	0.441626	-0.0392491	0.795655	0.0554755	0.71423	-0.334219	0.0232005
CNTNAP5	-0.0599498	0.692278	-0.189485	0.207221	0.376365	0.00993905	-0.248483	0.0958845	0.124026	0.411524	0.00313642	0.983495	-0.202001	0.178219	0.0299972	0.843126	-0.483586	0.000662562	-0.32409	0.0280005	-0.322935	0.0285969
RFC5	-0.0914105	0.545723	0.189322	0.207618	-0.119673	0.428258	0.177723	0.237349	-0.389932	0.00738823	0.271075	0.0684236	0.24369	0.102678	-0.291744	0.0491512	0.149494	0.321391	0.0200058	0.895012	-0.258817	0.0824217
USP6	-0.0101146	0.946809	0.189297	0.20768	-0.202354	0.177447	-0.00663615	0.965087	-0.00373152	0.980364	0.212448	0.156343	-0.0940884	0.533969	0.248675	0.0956195	0.112359	0.457215	0.136702	0.364987	0.372021	0.0109016
MHCY9	-0.143875	0.34012	-0.189249	0.207798	-0.150392	0.31846	-0.072844	0.630449	0.57772	2.62238e-05	0.0442505	0.770283	-0.178213	0.236038	-0.0602326	0.690898	-0.067406	0.656251	-0.180409	0.230219	-0.156236	0.299799
SLC35F3	-0.00932364	0.950963	-0.189181	0.207963	-0.229025	0.125768	0.174723	0.245489	-0.097655	0.518508	-0.161915	0.282351	-0.223273	0.13582	0.442136	0.00209489	-0.158692	0.29217	-0.0550071	0.716542	-0.250791	0.0927389
EPB41L5	0.0613653	0.685383	0.189143	0.208058	0.0218606	0.885341	0.0612215	0.686083	-0.11455	0.448428	-0.0668942	0.658701	0.396381	0.00638936	-0.420031	0.00365939	0.153291	0.309114	0.256257	0.0856103	0.352979	0.0161217
SLITRK6	-0.0929276	0.539049	-0.18907	0.208236	0.0153775	0.919208	0.113858	0.451194	0.76967	4.07864e-10	-0.222101	0.13794	-0.42763	0.00303337	0.059537	0.694293	-0.26237	0.0781518	-0.304843	0.0394021	-0.352464	0.0162881
PRRG3	0.0745329	0.622521	-0.188958	0.208511	0.723916	1.30655e-08	-0.180474	0.230049	-0.0623494	0.680605	-0.251654	0.0915841	0.0275517	0.855774	-0.0559756	0.711765	-0.0445422	0.76881	-0.160753	0.285866	-0.145885	0.333344
CEP112	-0.0978473	0.517681	0.188893	0.208669	-0.0795505	0.599219	-0.0713843	0.637334	-0.0398686	0.792501	0.0158735	0.916611	0.179537	0.232518	-0.114247	0.44964	0.312845	0.03427	0.247839	0.0967758	0.385715	0.00811217
DCTN3	-0.0449825	0.766589	0.188837	0.208808	-0.0725218	0.631966	-0.184744	0.219024	0.0246191	0.870988	0.0804198	0.595221	0.524694	0.000181615	-0.494417	0.000478562	0.2325	0.119973	0.565178	4.27123e-05	0.170363	0.257651
LYPLA2	0.0521686	0.730604	0.188799	0.208901	0.00538258	0.971679	-0.205628	0.170388	-0.135355	0.369775	-0.0358816	0.812859	0.271206	0.0682851	-0.18662	0.214301	0.183072	0.223296	0.286576	0.0534988	0.252506	0.0904544
ARAP3	-0.0638898	0.673151	-0.188796	0.208909	0.510254	0.000291563	-0.114182	0.4499	-0.0621193	0.681721	-0.0752924	0.61897	-0.101169	0.503499	0.0651993	0.666838	0.00166931	0.991215	-0.0450391	0.766303	0.125432	0.406201
RFX4	-0.139805	0.354096	-0.188274	0.210194	-0.230677	0.122988	-0.237632	0.111786	-0.0124669	0.934463	-0.0174187	0.908527	0.177248	0.238626	-0.0048503	0.974479	0.176354	0.241039	0.0506428	0.7382	-0.163107	0.278776
BACH1	0.184713	0.219103	0.188239	0.210279	-0.155717	0.301427	-0.109504	0.468796	-0.11371	0.451787	0.00821423	0.956792	0.156725	0.298268	-0.0311184	0.83734	0.0533919	0.724533	0.214231	0.152814	0.192717	0.199433
NABP2	-0.0494877	0.743966	-0.188224	0.210317	0.48924	0.000559826	-0.0965454	0.523294	-0.164825	0.273675	-0.160352	0.287085	0.0768265	0.611823	-0.186994	0.213367	-0.271888	0.0675664	-0.141099	0.349615	-0.275485	0.0638755
TBC1D7	-0.142088	0.346215	0.188121	0.210569	0.0542314	0.720376	-0.0648514	0.668513	0.255613	0.086427	-0.0820654	0.587686	0.163768	0.276804	-0.155788	0.301203	-0.178339	0.235701	-0.0360673	0.811908	0.384362	0.00835716
LOC416959	-0.222669	0.13691	-0.188088	0.210652	0.159241	0.290482	0.052162	0.730637	0.352738	0.0161992	-0.0179458	0.905771	-0.380787	0.00903528	0.125498	0.405952	-0.114803	0.447423	-0.329252	0.0254604	-0.195643	0.192563
ZBTB20	-0.306072	0.0385754	-0.188024	0.21081	0.0287935	0.849347	0.00513093	0.973003	-0.0802164	0.596156	-0.0538174	0.722425	-0.26638	0.0735439	0.159599	0.289385	-0.178281	0.235855	-0.0102641	0.946024	-0.00236867	0.987535
SH2D5	-0.157318	0.296423	0.187994	0.210883	-0.144967	0.33643	-0.187716	0.211573	-0.159728	0.288988	-0.129126	0.392408	0.482676	0.000680585	-0.263936	0.0763262	0.29673	0.0452325	0.15367	0.307905	0.272371	0.0670611
WDR25	0.273247	0.0661526	-0.187954	0.210983	0.677648	2.30627e-07	-0.121496	0.421202	-0.125078	0.407538	0.0287843	0.849395	-0.01714	0.909985	-0.0404416	0.789586	-0.177404	0.238205	0.146164	0.332412	-0.124487	0.409776
RYR2	-0.0900724	0.551643	0.187936	0.211028	-0.0177773	0.906652	0.226696	0.129769	-0.0574702	0.704414	-0.0425924	0.778669	-0.217182	0.147105	0.18289	0.223765	-0.181174	0.228216	-0.108385	0.47338	0.190364	0.205082
EIF5B	0.0242172	0.873076	0.187933	0.211034	-0.321547	0.0293276	-0.135605	0.368884	0.0513988	0.734433	0.169098	0.261254	0.393848	0.00676676	-0.288491	0.0518529	-0.026527	0.861084	0.280262	0.0592249	0.303116	0.0405883
CLUH	0.0965715	0.523181	0.187765	0.21145	-0.113461	0.452783	-0.11847	0.432946	0.00579149	0.969529	0.141042	0.349813	-0.0928732	0.539287	0.313542	0.0338503	-0.0692034	0.647677	0.00915074	0.951872	0.379401	0.00931051
C15orf52	0.293486	0.0477515	0.187626	0.211795	0.145746	0.333809	0.158117	0.293944	-0.27336	0.0660358	-0.0911371	0.54693	0.0379757	0.80215	0.0503034	0.739893	-0.204538	0.172716	0.259076	0.0821051	0.254637	0.0876773
WBP1L	-0.133083	0.377938	0.18762	0.211809	-0.094101	0.533914	-0.0490211	0.7463	-0.0685893	0.650601	-0.0386598	0.798659	0.232695	0.119654	0.0142165	0.92529	0.0574219	0.704651	0.0254599	0.866621	0.534329	0.000130841
POLR3A	-0.132362	0.380548	0.187604	0.211851	0.0547509	0.717808	-0.00266087	0.985998	0.0169457	0.911001	-0.326778	0.0266527	0.062632	0.679235	-0.129921	0.389472	0.0341811	0.82158	-0.204564	0.17266	-0.43295	0.00265321
ARID1A	-0.066713	0.659569	-0.187579	0.211911	0.369941	0.0113901	-0.271754	0.0677067	-0.0755107	0.617951	-0.232768	0.119534	-0.10105	0.504	0.0425646	0.778811	-0.130025	0.389092	-0.00891623	0.953104	-0.0474715	0.754065
LOC121106670	-0.206698	0.168126	-0.187415	0.212318	0.070937	0.63945	0.0142975	0.924866	-0.0309211	0.838358	0.137341	0.362729	0.152648	0.311171	-0.0730684	0.629393	-0.084351	0.577291	-0.0662267	0.661901	0.41544	0.00409013
RAB42	0.157226	0.296708	0.187339	0.212506	0.0410813	0.786335	-0.0980035	0.51701	-0.178802	0.234466	-0.0119845	0.936994	-0.0725059	0.632041	0.278259	0.0611405	-0.127196	0.399579	-0.0672927	0.656793	0.0317654	0.834006
CENPN	-0.113265	0.453569	-0.1872	0.212853	-0.066205	0.662005	-0.14777	0.327068	0.197526	0.188232	-0.134107	0.374244	0.13787	0.360866	-0.00742573	0.960937	-0.0196398	0.896922	0.19588	0.192014	0.127768	0.397444
CLIP2	0.143951	0.339862	0.187047	0.213234	0.0920269	0.543007	-0.346438	0.0183464	0.111349	0.461295	0.0920522	0.542895	-0.014772	0.92238	0.154497	0.305277	-0.157626	0.295465	-0.0823745	0.586275	0.450137	0.00169612
RSRC2	-0.343992	0.0192425	-0.186877	0.213657	0.0413917	0.784759	0.0461694	0.760609	0.036323	0.810599	-0.300729	0.0422766	0.0477711	0.752562	0.082297	0.586629	-0.299803	0.0429463	0.0728975	0.630197	0.229234	0.125414
TTC21B	-0.221002	0.139951	-0.186824	0.213791	-0.139733	0.354347	-0.213661	0.153937	0.22567	0.131561	0.0652378	0.666652	-0.00594601	0.968716	-0.0797872	0.59813	-0.0844214	0.576972	-0.0250543	0.868727	-0.0546322	0.718394
GTPBP4	-0.0336409	0.824355	0.186711	0.214072	0.10157	0.5018	-0.12026	0.425977	-0.12451	0.409689	-0.0731047	0.629222	0.364476	0.0127639	-0.298716	0.0437438	-0.0407337	0.788101	0.0229345	0.879749	0.327179	0.0264563
ANKRD6	0.0714607	0.636973	0.186656	0.214209	0.00976852	0.948627	-0.0138332	0.927299	0.00784751	0.95872	-0.0237927	0.875283	-0.055713	0.713059	0.123162	0.414817	-0.0997389	0.509579	-0.244544	0.10144	0.248896	0.0953157
LOC101750098	-0.00181956	0.990425	0.186647	0.214232	-0.0966735	0.52274	-0.0701489	0.643184	-0.00645515	0.966039	0.0237743	0.875379	0.21488	0.151546	-0.253892	0.0886401	-0.0198094	0.896037	0.339125	0.0211359	0.309916	0.0360808
GRID2	-0.29169	0.0491951	-0.186638	0.214254	-0.231425	0.121744	0.524769	0.000181156	0.164738	0.27393	0.00175252	0.990777	-0.110454	0.464924	-0.28798	0.0522878	0.139626	0.35472	-0.128524	0.394636	-0.289367	0.051114
LOC121109766	0.0899549	0.552164	0.186635	0.214263	-0.223061	0.136202	0.367255	0.0120487	0.0227119	0.880907	-0.165829	0.270723	0.0857594	0.570927	-0.106379	0.481655	0.165643	0.271268	0.173324	0.249347	-0.0331301	0.826981
LRRC61	-0.0812234	0.591536	-0.186629	0.214276	-0.122625	0.41687	0.00135811	0.992853	-0.165021	0.273095	-0.0133452	0.929857	0.324825	0.0276267	-0.170307	0.257812	0.185189	0.217898	-0.0211207	0.889197	-0.195973	0.1918
NXNL2	0.0080503	0.957654	0.186596	0.214359	0.0455956	0.763498	-0.11992	0.427297	-0.01489	0.921762	-0.0201585	0.894215	0.0502662	0.740079	-0.153577	0.308201	-0.0241416	0.87347	0.0620072	0.682265	0.223267	0.13583
HNRNPA1	0.174134	0.24711	-0.186592	0.214371	-0.176335	0.241092	-0.163318	0.278147	0.108038	0.474807	-0.132891	0.378631	0.0432342	0.77542	0.0781769	0.60556	-0.107789	0.475831	0.081258	0.591378	-0.0225147	0.881934
LSP1P1	-0.303604	0.0402503	-0.186571	0.214422	-0.118534	0.432697	-0.166585	0.268512	-0.138724	0.357866	-0.00852168	0.955177	0.0379458	0.802303	-0.00363432	0.980876	-0.072796	0.630675	0.10581	0.484016	0.070008	0.643853
EXOC5	-0.253047	0.0897436	-0.186534	0.214515	0.0220793	0.884201	-0.363536	0.013014	-0.0185515	0.902606	-0.0426259	0.7785	0.0934057	0.536954	0.0570557	0.70645	0.140028	0.353324	0.110122	0.466276	0.0292408	0.847034
SERAC1	0.00935688	0.950789	-0.186526	0.214534	0.108248	0.473945	-0.316508	0.032112	0.215716	0.149923	0.0021281	0.988801	-0.0800437	0.59695	0.0806443	0.594191	-0.120718	0.424205	-0.0623992	0.680364	-0.0289021	0.848785
FAM69A	-0.157044	0.297274	0.186514	0.214565	-0.121318	0.42189	-0.0344151	0.820378	0.00943041	0.950403	-0.103048	0.49556	-0.0757564	0.616804	-0.0151431	0.920436	-0.0914179	0.54569	-0.252171	0.0908971	-0.24808	0.0964414
ENOX1	0.023985	0.874284	-0.186418	0.214804	-0.227854	0.127768	0.38383	0.00845525	0.24242	0.104538	0.192958	0.198862	-0.18962	0.206892	0.0866579	0.566884	-0.0991945	0.511904	-0.132952	0.378412	0.126734	0.401309
NR2F1	-0.162279	0.281256	0.18637	0.214924	-0.22223	0.137705	-0.164033	0.27602	0.0255907	0.865942	-0.123801	0.41238	0.217348	0.14679	-0.0469307	0.756781	0.132777	0.379046	0.192871	0.199068	0.200343	0.181884
PLCE1	0.135802	0.368182	0.186343	0.214994	-0.102414	0.498233	-0.108137	0.474398	-0.131164	0.384912	0.221323	0.13936	0.0550939	0.716113	0.213491	0.154272	0.196358	0.190912	-0.057747	0.703056	0.233433	0.118452
ATP2C1	0.245092	0.100654	0.186263	0.215193	-0.248857	0.0953692	-0.0381838	0.801087	-0.26033	0.0805818	0.328339	0.0258948	0.197083	0.189244	0.0682503	0.652218	0.176898	0.239569	0.407519	0.00493845	0.261692	0.078953
SLC6A11	-0.159399	0.289998	-0.18619	0.215377	-0.204692	0.172385	-0.0618769	0.682898	-0.246354	0.0988569	0.348793	0.0175172	-0.240348	0.107629	0.463515	0.00117788	0.0968599	0.521935	-0.122595	0.416985	-0.0330544	0.82737
SYNCRIP	-0.159689	0.289108	-0.18601	0.215828	-0.298403	0.0439758	0.356671	0.0149699	0.405506	0.00517708	-0.134393	0.373217	-0.418765	0.00377398	0.189242	0.207815	-0.0343239	0.820847	-0.291874	0.0490455	-0.397683	0.00620252
SCAI	0.245523	0.100037	0.186006	0.215839	-0.0562568	0.71038	-0.267939	0.0718104	0.00881322	0.953645	-0.129479	0.391104	-0.148045	0.32616	0.254911	0.0873242	-0.0536568	0.72322	0.197851	0.187492	0.0097656	0.948642
APLP2	0.278415	0.0609899	0.185983	0.215896	-0.097639	0.518577	-0.02395	0.874466	0.0787504	0.602909	-0.0962278	0.524668	0.0782211	0.605356	0.144375	0.338426	-0.190023	0.205911	-0.0155008	0.918563	0.364615	0.0127273
MRPS17	-0.0132907	0.930143	0.185915	0.216067	-0.0928065	0.53958	0.00056523	0.997025	-0.29269	0.0483871	-0.0855627	0.571814	0.244485	0.101526	-0.189706	0.206681	0.141808	0.347174	0.234118	0.117344	-0.335648	0.0225825
[truncated: 4,886 more rows]

## Sheet: Pituitary WGCNA analyses
Supplementary Table 6 - WGCNA analyses of the pituitary gland
[truncated: 5,108 more rows]
