# Supplementary material for: FSHβ links photoperiodic signaling to seasonal reproduction in Japanese quail
Source: eLife journal article supplement (doi:10.7554/elife.87751), 2023-07-12

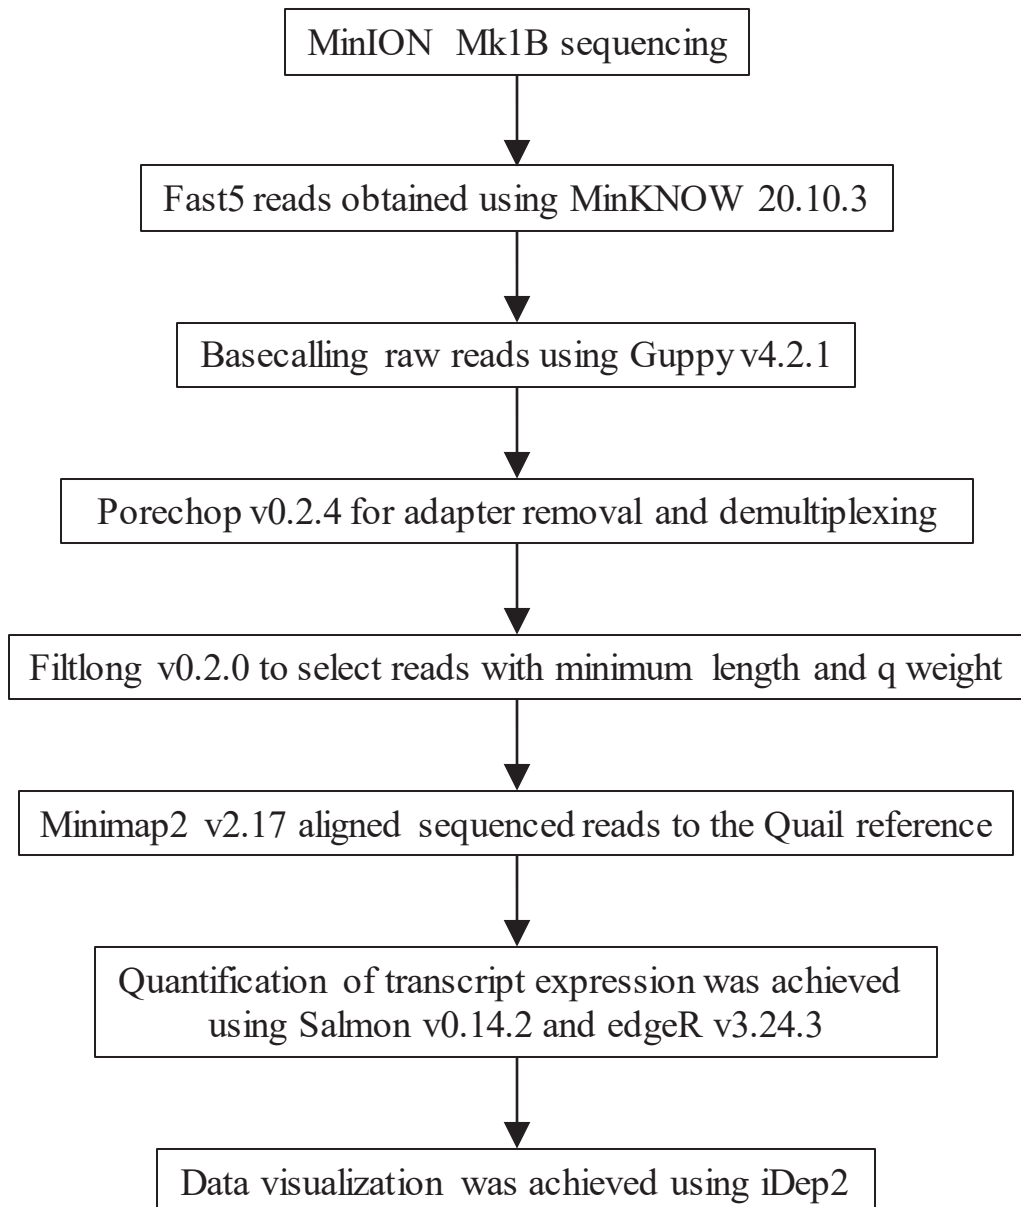

Supplement: supp3 [file elife-87751-supp3-v1.pdf]
